# Supplementary material for: Captodative substitution induced acceleration effect towards 4π electrocyclic ring-opening of substituted cyclobutenes
Source: Royal Society of Chemistry journal article supplement (doi:10.1039/c5ra26590h), 2016-01-01
Supplement: c5ra26590h1.pdf [file c5ra26590h1.pdf]

## Captodative substitution induced acceleration effect towards $4\pi$ electrocyclic ring-opening of substituted cyclobutenes

Nadeem S. Sheikh

Department of Chemistry, Faculty of Science, King Faisal University, P.O. Box 380, Al-Ahsa 31982, Saudi Arabia

Email: n.sadiq.s@gmail.com; nsheikh@kfu.edu.sa; Fax: +966 (0)13 588 6437; Tel. +966 (0)13 589 9574

|       |                                                                                                                         |       |
|-------|-------------------------------------------------------------------------------------------------------------------------|-------|
| 1.    | Complete citation for the reference 28                                                                                  | S 2   |
| 2.    | Linear free energy relationships for monosubstituted cyclobutenes                                                       | S 2   |
| 3.    | Graphical description of torquoselectivity for monosubstituted cyclobutenes                                             | S 3   |
| 4.    | Linear free energy relationships for activation free energy and reaction exothermicity for monosubstituted cyclobutenes | S 4   |
| 5.    | Energies for                                                                                                            | S 5   |
| 5.1   | Butadiene                                                                                                               | S 5   |
| 5.2   | Monosubstituted butadienes                                                                                              | S 6   |
| 5.2.1 | 1-Substituted butadienes (outward rotation of substituents)                                                             | S 6   |
| 5.2.2 | 1-Substituted butadienes (inward rotation of substituents)                                                              | S 7   |
| 5.2.3 | 2-Substituted butadienes                                                                                                | S 8   |
| 5.3   | Disubstituted butadienes                                                                                                | S 9   |
| 5.3.1 | 1,2-Disubstituted butadienes                                                                                            | S 9   |
| 5.3.2 | 1,3-Disubstituted butadienes                                                                                            | S 16  |
| 5.3.3 | 1,4-Disubstituted butadienes                                                                                            | S 23  |
| 5.3.4 | 2,3-Disubstituted butadienes                                                                                            | S 30  |
| 6.    | Cartesian coordinates for                                                                                               | S 36  |
| 6.1   | Butadiene                                                                                                               | S 36  |
| 6.2   | Monosubstituted butadienes                                                                                              | S 38  |
| 6.2.1 | 1-Substituted butadienes (outward rotation of substituents)                                                             | S 38  |
| 6.2.2 | 1-Substituted butadienes (inward rotation of substituents)                                                              | S 47  |
| 6.2.3 | 2-Substituted butadienes                                                                                                | S 56  |
| 6.3   | Disubstituted butadienes                                                                                                | S 65  |
| 6.3.1 | 1,2-Disubstituted butadienes                                                                                            | S 65  |
| 6.3.2 | 1,3-Disubstituted butadienes                                                                                            | S 134 |
| 6.3.3 | 1,4-Disubstituted butadienes                                                                                            | S 203 |
| 6.3.4 | 2,3-Disubstituted butadienes                                                                                            | S 272 |
| 7.    | Intrinsic reaction coordinates (IRC) for the transition states of                                                       | S 312 |
| 7.1   | Butadiene                                                                                                               | S 312 |
| 7.2   | Monosubstituted butadienes                                                                                              | S 313 |
| 7.2.1 | 1-Substituted butadienes (outward rotation of substituents)                                                             | S 313 |
| 7.2.2 | 1-Substituted butadienes (inward rotation of substituents)                                                              | S 320 |
| 7.2.3 | 2-Substituted butadienes                                                                                                | S 327 |
| 7.3   | Representative disubstituted butadienes                                                                                 | S 334 |
| 7.3.1 | NO <sub>2</sub> -NH <sub>2</sub> -Disubstituted butadienes                                                              | S 334 |
| 7.3.2 | NH <sub>2</sub> -NH <sub>2</sub> -Disubstituted butadienes                                                              | S 338 |
| 7.3.3 | NO <sub>2</sub> -NO <sub>2</sub> -Disubstituted butadienes                                                              | S 342 |
| 8.    | Reaction exoergonicity values for                                                                                       | S 346 |
| 8.1   | Monosubstituted cyclobutenes                                                                                            | S 346 |
| 8.2   | Disubstituted cyclobutenes                                                                                              | S 347 |
| 8.3   | Optimised transition state structures for representative 1,2-disubstituted compounds                                    | S 348 |
| 9.    | $E_{extra}$ values for disubstituted cyclobutenes                                                                       | S 349 |

## 1. Complete citation for the reference 28

GAUSSIAN09, Revision D.01, M. J. Frisch, G. W. Trucks, H. B. Schlegel, G. E. Scuseria, M. A. Robb, J. R. Cheeseman, G. Scalmani, V. Barone, B. Mennucci, G. A. Petersson, H. Nakatsuji, M. Caricato, X. Li, H. P. Hratchian, A. F. Izmaylov, J. Bloino, G. Zheng, J. L. Sonnenberg, M. Hada, M. Ehara, K. Toyota, R. Fukuda, J. Hasegawa, M. Ishida, T. Nakajima, Y. Honda, O. Kitao, H. Nakai, T. Vreven, J. A. Montgomery Jr., J. E. Peralta, F. Ogliar, M. Bearpark, J. J. Heyd, E. Brothers, K. N. Kudin, V. N. Staroverov, T. Keith, R. Kobayashi, J. Normand, K. Raghavachari, A. Rendell, J. C. Burant, S. S. Iyengar, J. Tomasi, M. Cossi, N. Rega, J. M. Millam, M. Klene, J. E. Knox, J. B. Cross, V. Bakken, C. Adamo, J. Jaramillo, R. Gomperts, R. E. Stratmann, O. Yazyev, A. J. Austin, R. Cammi, C. Pomelli, J. W. Ochterski, R. L. Martin, K. Morokuma, V. G. Zakrzewski, G. A. Voth, P. Salvador, J. J. Dannenberg, S. Dapprich, A. D. Daniels, O. Farkas, J. B. Foresman, J. V. Ortiz, J. Cioslowski and D. J. Fox, Gaussian, Inc., Wallingford CT, 2013.

## 2. Linear free energy relationships for monosubstituted cyclobutenes

a)

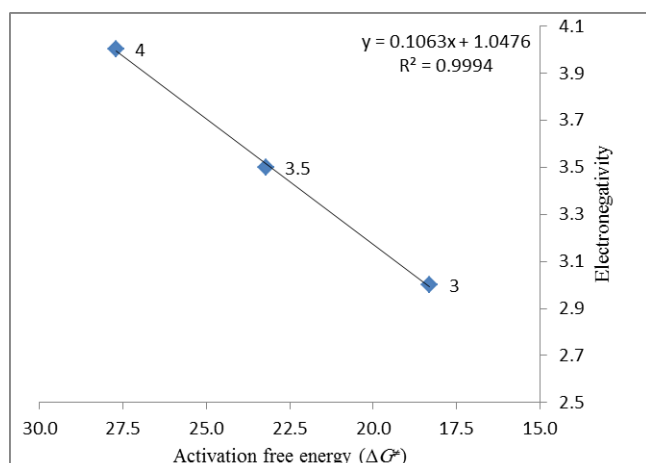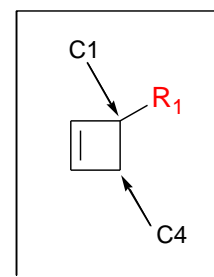

b)

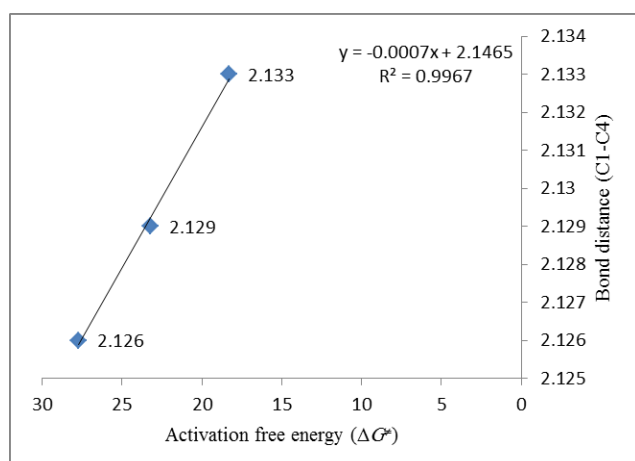

c)

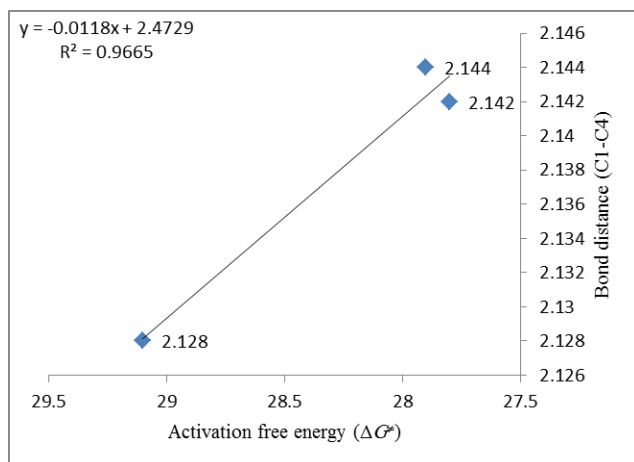

**Fig. 1** Correlations involving linear free energy relationships between the activation free energy ( $\Delta G^\ddagger$ ) of  
**a)**  $\text{NH}_2$ ,  $\text{OH}$  and  $\text{F}$  substituted cyclobutenes at C1 positions against the electronegativity values of N, O, and F atoms;  
**b)**  $\text{NH}_2$ ,  $\text{OH}$  and  $\text{F}$  substituted cyclobutenes at C1 positions against their corresponding C1–C4 bond distances in the transition states;  
**c)**  $\text{C}(\text{O})\text{CH}_3$ ,  $\text{CN}$  and  $\text{NO}_2$  substituted cyclobutenes at C1 positions against their corresponding C1–C4 bond distances in the transition states.

**Note:** By plotting the calculated bond lengths against corresponding barriers for all C1 substituted cyclobutenes, poor/no free energy linear relationships were obtained. Also, poor correlations were observed between the energy barriers and corresponding Hammett constants of the substituents.

### 3. Graphical description of torquoselectivity for monosubstituted cyclobutenes

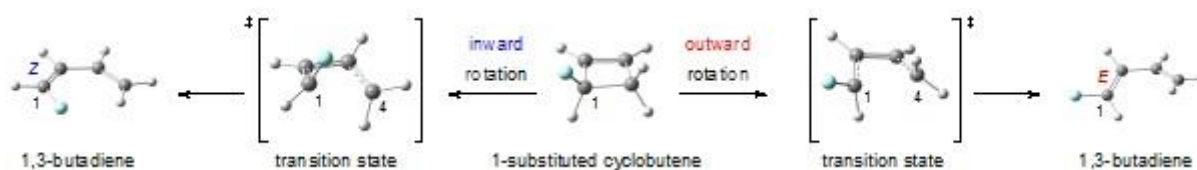

**Fig. 2** Representative pictorial description of inward and outward rotations of F substituent located at C1 position of cyclobutene.

#### 4 Linear free energy relationships for activation free energy and reaction exothermicity for monosubstituted cyclobutenes

a)

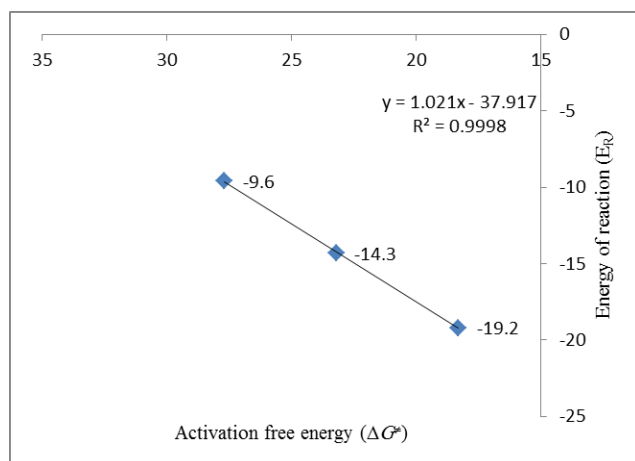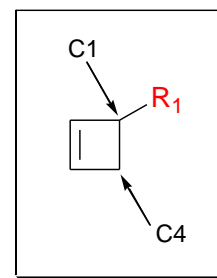

b)

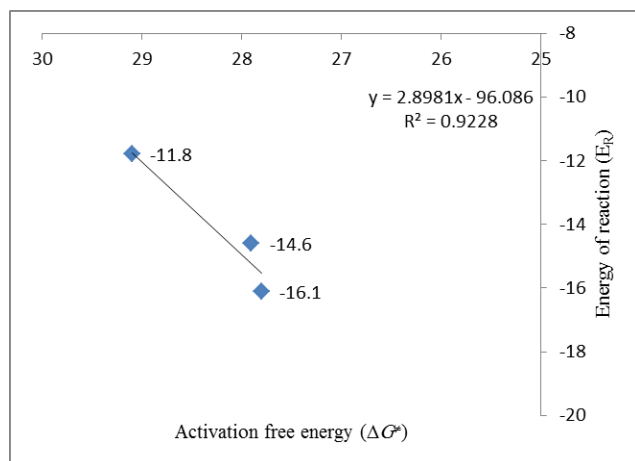

**Fig. 3** Correlations involving linear free energy relationships between the activation free energy ( $\Delta G^\ddagger$ ) and energy of reaction ( $E_R$ ) for

a)  $\text{NH}_2$ , OH and F substituted cyclobutenes at C1 positions;

b)  $\text{C}(\text{O})\text{CH}_3$ , CN and  $\text{NO}_2$  substituted cyclobutenes at C1 positions.

**Note:** Poor/ no correlations were observed by plotting free energy barriers against corresponding energies of reactions and the bond distance (C1–C4) for all C1 substituted cyclobutenes.

## 5. Energies for

## 5.1 Butadiene

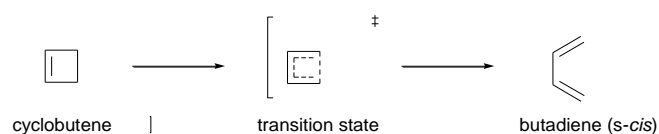

| Butadiene [Product], (Hartree) |                                           |                   |
|--------------------------------|-------------------------------------------|-------------------|
| Total Electronic Energy        | Sum of Electronic and Zero-Point Energies | Gibbs Free Energy |
| -155.9953673                   | -155.9102480                              | -155.9369670      |

  

| Transition State, (Hartree) |                                           |                   |
|-----------------------------|-------------------------------------------|-------------------|
| Total Electronic Energy     | Sum of Electronic and Zero-Point Energies | Gibbs Free Energy |
| -155.9252189                | -155.8412880                              | -155.8669580      |

  

| Cyclobutene [Starting Material], (Hartree) |                                           |                   |
|--------------------------------------------|-------------------------------------------|-------------------|
| Total Electronic Energy                    | Sum of Electronic and Zero-Point Energies | Gibbs Free Energy |
| -155.9797476                               | -155.8931250                              | -155.9187460      |

## 5.2 Monosubstituted butadienes

### 5.2.1 1-Substituted butadienes (outward rotation of substituents)

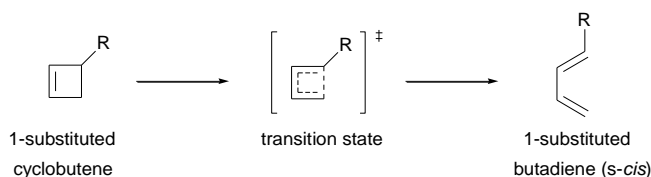

| Entry | R                   | Butadiene [Product], (Hartree) |                                           |                   |
|-------|---------------------|--------------------------------|-------------------------------------------|-------------------|
|       |                     | Total Electronic Energy        | Sum of Electronic and Zero-Point Energies | Gibbs Free Energy |
| 1     | CH <sub>3</sub>     | -195.3158192                   | -195.2024940                              | -195.2315610      |
| 2     | NH <sub>2</sub>     | -211.3559655                   | -211.2533510                              | -211.2819880      |
| 3     | OH                  | -231.2159875                   | -231.1262220                              | -231.1548460      |
| 4     | F                   | -255.2359958                   | -255.1583410                              | -255.1867290      |
| 5     | C(O)CH <sub>3</sub> | -308.6513638                   | -308.5281220                              | -308.5609210      |
| 6     | CN                  | -248.2444639                   | -248.1601200                              | -248.1900280      |
| 7     | NO <sub>2</sub>     | -360.5084487                   | -360.4199600                              | -360.4516760      |

| Entry | R                   | Transition State, (Hartree) |                                           |                   |
|-------|---------------------|-----------------------------|-------------------------------------------|-------------------|
|       |                     | Total Electronic Energy     | Sum of Electronic and Zero-Point Energies | Gibbs Free Energy |
| 1     | CH <sub>3</sub>     | -195.2461315                | -195.1344540                              | -195.1633160      |
| 2     | NH <sub>2</sub>     | -211.2962231                | -211.1947410                              | -211.2221940      |
| 3     | OH                  | -231.1566367                | -231.0676610                              | -231.0949870      |
| 4     | F                   | -255.1766898                | -255.0999920                              | -255.1272450      |
| 5     | C(O)CH <sub>3</sub> | -308.5822332                | -308.4606370                              | -308.4925980      |
| 6     | CN                  | -248.1764687                | -248.0933730                              | -248.1221450      |
| 7     | NO <sub>2</sub>     | -360.4433421                | -360.3561030                              | -360.3865830      |

| Entry | R                   | Cyclobutene [Starting Material], (Hartree) |                                           |                   |
|-------|---------------------|--------------------------------------------|-------------------------------------------|-------------------|
|       |                     | Total Electronic Energy                    | Sum of Electronic and Zero-Point Energies | Gibbs Free Energy |
| 1     | CH <sub>3</sub>     | -195.2970650                               | -195.1822290                              | -195.2098920      |
| 2     | NH <sub>2</sub>     | -211.3275257                               | -211.2237190                              | -211.2514100      |
| 3     | OH                  | -231.1954838                               | -231.1045130                              | -231.1319910      |
| 4     | F                   | -255.2234064                               | -255.1441800                              | -255.1714380      |
| 5     | C(O)CH <sub>3</sub> | -308.6278294                               | -308.5036480                              | -308.5353200      |
| 6     | CN                  | -248.2236211                               | -248.1379740                              | -248.1666860      |
| 7     | NO <sub>2</sub>     | -360.4910476                               | -360.4012970                              | -360.4328970      |

## 5.2.2 1-Substituted butadienes (inward rotation of substituents)

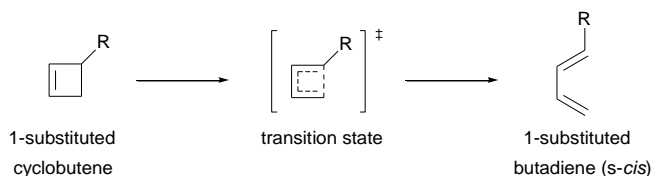

| Entry | R                   | Butadiene [Product], (Hartree) |                                           |                   |
|-------|---------------------|--------------------------------|-------------------------------------------|-------------------|
|       |                     | Total Electronic Energy        | Sum of Electronic and Zero-Point Energies | Gibbs Free Energy |
| 1     | CH <sub>3</sub>     | -195.3132946                   | -195.1994960                              | -195.2284890      |
| 2     | NH <sub>2</sub>     | -211.3578934                   | -211.2544640                              | -211.2828080      |
| 3     | OH                  | -231.2179292                   | -231.1274420                              | -231.1559300      |
| 4     | F                   | -255.2373343                   | -255.1591770                              | -255.1877000      |
| 5     | C(O)CH <sub>3</sub> | -308.6462229                   | -308.5225380                              | -308.5557270      |
| 6     | CN                  | -248.2437889                   | -248.1589680                              | -248.1891530      |
| 7     | NO <sub>2</sub>     | -360.5011987                   | -360.4122020                              | -360.4453190      |

| Entry | R                   | Transition State, (Hartree) |                                           |                   |
|-------|---------------------|-----------------------------|-------------------------------------------|-------------------|
|       |                     | Total Electronic Energy     | Sum of Electronic and Zero-Point Energies | Gibbs Free Energy |
| 1     | CH <sub>3</sub>     | -195.2361213                | -195.1239790                              | -195.1515930      |
| 2     | NH <sub>2</sub>     | -211.2662339                | -211.1653100                              | -211.1928830      |
| 3     | OH                  | -231.1294267                | -231.0414460                              | -231.0689100      |
| 4     | F                   | -255.1530871                | -255.0770170                              | -255.1043250      |
| 5     | C(O)CH <sub>3</sub> | -308.5779420                | -308.4565000                              | -308.4880700      |
| 6     | CN                  | -248.1689824                | -248.0860140                              | -248.1146860      |
| 7     | NO <sub>2</sub>     | -360.4332191                | -360.3461360                              | -360.3763630      |

| Entry | R                   | Cyclobutene [Starting Material], (Hartree) |                                           |                   |
|-------|---------------------|--------------------------------------------|-------------------------------------------|-------------------|
|       |                     | Total Electronic Energy                    | Sum of Electronic and Zero-Point Energies | Gibbs Free Energy |
| 1     | CH <sub>3</sub>     | -195.2970649                               | -195.1822290                              | -195.2098910      |
| 2     | NH <sub>2</sub>     | -211.3298002                               | -211.2257750                              | -211.2533310      |
| 3     | OH                  | -231.1954836                               | -231.1045140                              | -231.1319930      |
| 4     | F                   | -255.2234064                               | -255.1441800                              | -255.1714380      |
| 5     | C(O)CH <sub>3</sub> | -308.6276575                               | -308.5037310                              | -308.5356460      |
| 6     | CN                  | -248.2236212                               | -248.1379750                              | -248.1666860      |
| 7     | NO <sub>2</sub>     | -360.4910476                               | -360.4012970                              | -360.4328970      |

## 5.2.3 2-Substituted butadienes

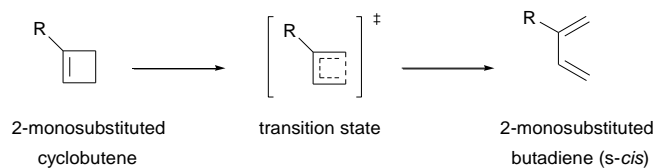

| Entry | R                   | Butadiene [Product], (Hartree) |                                           |                   |
|-------|---------------------|--------------------------------|-------------------------------------------|-------------------|
|       |                     | Total Electronic Energy        | Sum of Electronic and Zero-Point Energies | Gibbs Free Energy |
| 1     | CH <sub>3</sub>     | -155.9953673                   | -155.9102480                              | -155.9369670      |
| 2     | NH <sub>2</sub>     | -195.3148461                   | -195.2015800                              | -195.2304830      |
| 3     | OH                  | -211.3550116                   | -211.2525740                              | -211.2810100      |
| 4     | F                   | -231.219649                    | -231.130029                               | -231.158549       |
| 5     | C(O)CH <sub>3</sub> | -255.2402055                   | -255.1629350                              | -255.1914090      |
| 6     | CN                  | -308.6474341                   | -308.5243420                              | -308.5567410      |
| 7     | NO <sub>2</sub>     | -248.2399994                   | -248.1559100                              | -248.1857340      |

| Entry | R                   | Transition State, (Hartree) |                                           |                   |
|-------|---------------------|-----------------------------|-------------------------------------------|-------------------|
|       |                     | Total Electronic Energy     | Sum of Electronic and Zero-Point Energies | Gibbs Free Energy |
| 1     | CH <sub>3</sub>     | -155.9252189                | -155.8412880                              | -155.8669580      |
| 2     | NH <sub>2</sub>     | -195.2462215                | -195.1344830                              | -195.1628600      |
| 3     | OH                  | -211.2883990                | -211.1873420                              | -211.2148290      |
| 4     | F                   | -231.1511044                | -231.062468                               | -231.089808       |
| 5     | C(O)CH <sub>3</sub> | -255.1704014                | -255.0940470                              | -255.1212990      |
| 6     | CN                  | -308.5831243                | -308.4616620                              | -308.4934700      |
| 7     | NO <sub>2</sub>     | -248.1751392                | -248.0921800                              | -248.1209230      |

| Entry | R                   | Cyclobutene [Starting Material], (Hartree) |                                           |                   |
|-------|---------------------|--------------------------------------------|-------------------------------------------|-------------------|
|       |                     | Total Electronic Energy                    | Sum of Electronic and Zero-Point Energies | Gibbs Free Energy |
| 1     | CH <sub>3</sub>     | -155.9797476                               | -155.8931250                              | -155.9187460      |
| 2     | NH <sub>2</sub>     | -195.3036595                               | -195.1890470                              | -195.2170370      |
| 3     | OH                  | -211.3436203                               | -211.2396740                              | -211.2672100      |
| 4     | F                   | -231.2058093                               | -231.114602                               | -231.142144       |
| 5     | C(O)CH <sub>3</sub> | -255.2258948                               | -255.1465510                              | -255.1737800      |
| 6     | CN                  | -308.6378058                               | -308.5136590                              | -308.5463100      |
| 7     | NO <sub>2</sub>     | -248.2310472                               | -248.1452950                              | -248.1740470      |



### 5.3 Energies for disubstituted butadienes

#### 5.3.1 1,2-Disubstituted butadienes

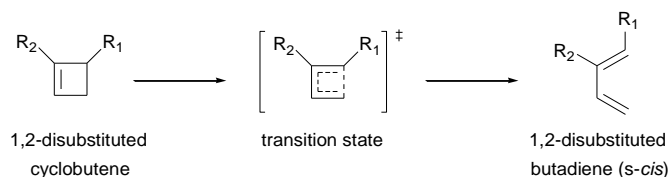

| Entry | R <sub>1</sub>  | R <sub>2</sub>      | Butadiene [Product], (Hartree) |                                           |                   |
|-------|-----------------|---------------------|--------------------------------|-------------------------------------------|-------------------|
|       |                 |                     | Total Electronic Energy        | Sum of Electronic and Zero-Point Energies | Gibbs Free Energy |
| 1     | CH <sub>3</sub> | CH <sub>3</sub>     | -234.6319655                   | -234.4904790                              | -234.5218560      |
| 2     |                 | NH <sub>2</sub>     | -250.6710463                   | -250.5408260                              | -250.5722010      |
| 3     |                 | OH                  | -270.5369862                   | -270.4192610                              | -270.4506810      |
| 4     |                 | F                   | -294.5599033                   | -294.4543960                              | -294.4853380      |
| 5     |                 | C(O)CH <sub>3</sub> | -347.9598784                   | -347.8084610                              | -347.8433550      |
| 6     |                 | CN                  | -287.5623944                   | -287.4501070                              | -287.4821240      |
| 7     |                 | NO <sub>2</sub>     | -399.8225912                   | -399.7062730                              | -399.7401580      |

| Entry | R <sub>1</sub>  | R <sub>2</sub>      | Transition State, (Hartree) |                                           |                   |
|-------|-----------------|---------------------|-----------------------------|-------------------------------------------|-------------------|
|       |                 |                     | Total Electronic Energy     | Sum of Electronic and Zero-Point Energies | Gibbs Free Energy |
| 1     | CH <sub>3</sub> | CH <sub>3</sub>     | -234.5665524                | -234.4269190                              | -234.4575280      |
| 2     |                 | NH <sub>2</sub>     | -250.6083347                | -250.4791770                              | -250.5089560      |
| 3     |                 | OH                  | -270.4717467                | -270.3552400                              | -270.3850500      |
| 4     |                 | F                   | -294.4915834                | -294.3873500                              | -294.4171760      |
| 5     |                 | C(O)CH <sub>3</sub> | -347.9050317                | -347.7555620                              | -347.7893950      |
| 6     |                 | CN                  | -287.4978808                | -287.3871020                              | -287.4184610      |
| 7     |                 | NO <sub>2</sub>     | -399.7625175                | -399.6475330                              | -399.6798700      |

| Entry | R <sub>1</sub>  | R <sub>2</sub>      | Cyclobutene [Starting Material], (Hartree) |                                           |                   |
|-------|-----------------|---------------------|--------------------------------------------|-------------------------------------------|-------------------|
|       |                 |                     | Total Electronic Energy                    | Sum of Electronic and Zero-Point Energies | Gibbs Free Energy |
| 1     | CH <sub>3</sub> | CH <sub>3</sub>     | -234.6207264                               | -234.4779700                              | -234.5079240      |
| 2     |                 | NH <sub>2</sub>     | -250.6607603                               | -250.5286940                              | -250.5582170      |
| 3     |                 | OH                  | -270.5229359                               | -270.4036090                              | -270.4331630      |
| 4     |                 | F                   | -294.5433240                               | -294.4357850                              | -294.4649980      |
| 5     |                 | C(O)CH <sub>3</sub> | -347.9551309                               | -347.8028520                              | -347.8371870      |
| 6     |                 | CN                  | -287.5489776                               | -287.4350970                              | -287.4658260      |
| 7     |                 | NO <sub>2</sub>     | -399.8115851                               | -399.6936700                              | -399.7259750      |

| Entry | R <sub>1</sub>  | R <sub>2</sub>      | Butadiene [Product], (Hartree) |                                           |                   |
|-------|-----------------|---------------------|--------------------------------|-------------------------------------------|-------------------|
|       |                 |                     | Total Electronic Energy        | Sum of Electronic and Zero-Point Energies | Gibbs Free Energy |
| 1     | NH <sub>2</sub> | CH <sub>3</sub>     | -250.6726036                   | -250.5420480                              | -250.5730520      |
| 2     |                 | NH <sub>2</sub>     | -266.7104499                   | -266.5906120                              | -266.6212120      |
| 3     |                 | OH                  | -286.5763658                   | -286.4688560                              | -286.4991720      |
| 4     |                 | F                   | -310.5985978                   | -310.5037440                              | -310.5339790      |
| 5     |                 | C(O)CH <sub>3</sub> | -364.0093457                   | -363.8687810                              | -363.9028840      |
| 6     |                 | CN                  | -303.6100840                   | -303.5085140                              | -303.5402090      |
| 7     |                 | NO <sub>2</sub>     | -415.8816326                   | -415.7754680                              | -415.8079480      |

| Entry | R <sub>1</sub>  | R <sub>2</sub>      | Transition State, (Hartree) |                                           |                   |
|-------|-----------------|---------------------|-----------------------------|-------------------------------------------|-------------------|
|       |                 |                     | Total Electronic Energy     | Sum of Electronic and Zero-Point Energies | Gibbs Free Energy |
| 1     | NH <sub>2</sub> | CH <sub>3</sub>     | -250.6159733                | -250.4865490                              | -250.5162560      |
| 2     |                 | NH <sub>2</sub>     | -266.6560200                | -266.5371430                              | -266.5662970      |
| 3     |                 | OH                  | -286.5175885                | -286.4118430                              | -286.4409670      |
| 4     |                 | F                   | -310.5380930                | -310.4447030                              | -310.4737750      |
| 5     |                 | C(O)CH <sub>3</sub> | -363.9573134                | -363.8181580                              | -363.8516180      |
| 6     |                 | CN                  | -303.5493927                | -303.4490480                              | -303.4795280      |
| 7     |                 | NO <sub>2</sub>     | -415.8139481                | -415.7094630                              | -415.7413880      |

| Entry | R <sub>1</sub>  | R <sub>2</sub>      | Cyclobutene [Starting Material], (Hartree) |                                           |                   |
|-------|-----------------|---------------------|--------------------------------------------|-------------------------------------------|-------------------|
|       |                 |                     | Total Electronic Energy                    | Sum of Electronic and Zero-Point Energies | Gibbs Free Energy |
| 1     | NH <sub>2</sub> | CH <sub>3</sub>     | -250.6515052                               | -250.5197200                              | -250.5496560      |
| 2     |                 | NH <sub>2</sub>     | -266.6908384                               | -266.5697820                              | -266.5994970      |
| 3     |                 | OH                  | -286.5590150                               | -286.4500540                              | -286.4792060      |
| 4     |                 | F                   | -310.5731863                               | -310.4767020                              | -310.5059200      |
| 5     |                 | C(O)CH <sub>3</sub> | -363.9876557                               | -363.8462460                              | -363.8807100      |
| 6     |                 | CN                  | -303.5793002                               | -303.4764660                              | -303.5071910      |
| 7     |                 | NO <sub>2</sub>     | -415.8430584                               | -415.7360390                              | -415.7681570      |

| Entry | R <sub>1</sub> | R <sub>2</sub>      | Butadiene [Product], (Hartree) |                                           |                   |
|-------|----------------|---------------------|--------------------------------|-------------------------------------------|-------------------|
|       |                |                     | Total Electronic Energy        | Sum of Electronic and Zero-Point Energies | Gibbs Free Energy |
| 1     | OH             | CH <sub>3</sub>     | -270.5349183                   | -270.4169570                              | -270.4477490      |
| 2     |                | NH <sub>2</sub>     | -286.5732258                   | -286.4662010                              | -286.4965790      |
| 3     |                | OH                  | -306.4307729                   | -306.3368150                              | -306.3672390      |
| 4     |                | F                   | -330.4531007                   | -330.3711180                              | -330.4013410      |
| 5     |                | C(O)CH <sub>3</sub> | -383.8690168                   | -383.7408660                              | -383.7745340      |
| 6     |                | CN                  | -323.4622866                   | -323.3732840                              | -323.4047300      |
| 7     |                | NO <sub>2</sub>     | -435.7211642                   | -435.6279080                              | -435.6610720      |

| Entry | R <sub>1</sub> | R <sub>2</sub>      | Transition State, (Hartree) |                                           |                   |
|-------|----------------|---------------------|-----------------------------|-------------------------------------------|-------------------|
|       |                |                     | Total Electronic Energy     | Sum of Electronic and Zero-Point Energies | Gibbs Free Energy |
| 1     | OH             | CH <sub>3</sub>     | -270.4775159                | -270.3606430                              | -270.3903090      |
| 2     |                | NH <sub>2</sub>     | -286.5151231                | -286.4092090                              | -286.4383420      |
| 3     |                | OH                  | -306.3773052                | -306.2839690                              | -306.3129870      |
| 4     |                | F                   | -330.3970573                | -330.3157610                              | -330.3445910      |
| 5     |                | C(O)CH <sub>3</sub> | -383.8138828                | -383.6871950                              | -383.7200810      |
| 6     |                | CN                  | -323.4066769                | -323.3186580                              | -323.3489200      |
| 7     |                | NO <sub>2</sub>     | -435.6685527                | -435.5766470                              | -435.6084310      |

| Entry | R <sub>1</sub> | R <sub>2</sub>      | Cyclobutene [Starting Material], (Hartree) |                                           |                   |
|-------|----------------|---------------------|--------------------------------------------|-------------------------------------------|-------------------|
|       |                |                     | Total Electronic Energy                    | Sum of Electronic and Zero-Point Energies | Gibbs Free Energy |
| 1     | OH             | CH <sub>3</sub>     | -270.5200494                               | -270.4011110                              | -270.4309010      |
| 2     |                | NH <sub>2</sub>     | -286.5609380                               | -286.4525630                              | -286.4818410      |
| 3     |                | OH                  | -306.4210657                               | -306.3254580                              | -306.3546640      |
| 4     |                | F                   | -330.4390287                               | -330.3555140                              | -330.3845900      |
| 5     |                | C(O)CH <sub>3</sub> | -383.8517692                               | -383.7233210                              | -383.7567160      |
| 6     |                | CN                  | -323.4449877                               | -323.3551760                              | -323.3858630      |
| 7     |                | NO <sub>2</sub>     | -435.6685527                               | -435.5766470                              | -435.6084310      |

| Entry | R <sub>1</sub> | R <sub>2</sub>      | 1,3-Butadiene [Product], (Hartree) |                                           |                   |
|-------|----------------|---------------------|------------------------------------|-------------------------------------------|-------------------|
|       |                |                     | Total Electronic Energy            | Sum of Electronic and Zero-Point Energies | Gibbs Free Energy |
| 1     | F              | CH <sub>3</sub>     | -294.5556334                       | -294.4497920                              | -294.4803420      |
| 2     |                | NH <sub>2</sub>     | -310.5941462                       | -310.4990730                              | -310.5290730      |
| 3     |                | OH                  | -330.4514227                       | -330.3693850                              | -330.3994600      |
| 4     |                | F                   | -354.4714732                       | -354.4015260                              | -354.4314490      |
| 5     |                | C(O)CH <sub>3</sub> | -407.8858411                       | -407.7702010                              | -407.8039200      |
| 6     |                | CN                  | -347.4772336                       | -347.4005900                              | -347.4319000      |
| 7     |                | NO <sub>2</sub>     | -459.7344641                       | -459.6538930                              | -459.6873000      |

| Entry | R <sub>1</sub> | R <sub>2</sub>      | Transition State, (Hartree) |                                           |                   |
|-------|----------------|---------------------|-----------------------------|-------------------------------------------|-------------------|
|       |                |                     | Total Electronic Energy     | Sum of Electronic and Zero-Point Energies | Gibbs Free Energy |
| 1     | F              | CH <sub>3</sub>     | -294.4982975                | -294.3937250                              | -294.4234230      |
| 2     |                | NH <sub>2</sub>     | -310.5387408                | -310.4447310                              | -310.4736870      |
| 3     |                | OH                  | -330.3977579                | -330.3164940                              | -330.3453530      |
| 4     |                | F                   | -354.4156299                | -354.3465130                              | -354.3752310      |
| 5     |                | C(O)CH <sub>3</sub> | -407.8296920                | -407.7155410                              | -407.7486050      |
| 6     |                | CN                  | -347.4226784                | -347.3470330                              | -347.3772380      |
| 7     |                | NO <sub>2</sub>     | -459.6834206                | -459.6038620                              | -459.6356380      |

| Entry | R <sub>1</sub> | R <sub>2</sub>      | Cyclobutene [Starting Material], (Hartree) |                                           |                   |
|-------|----------------|---------------------|--------------------------------------------|-------------------------------------------|-------------------|
|       |                |                     | Total Electronic Energy                    | Sum of Electronic and Zero-Point Energies | Gibbs Free Energy |
| 1     | F              | CH <sub>3</sub>     | -294.5478951                               | -294.4407190                              | -294.4703220      |
| 2     |                | NH <sub>2</sub>     | -310.5881720                               | -310.4916480                              | -310.5207410      |
| 3     |                | OH                  | -330.4484469                               | -330.3645230                              | -330.3934370      |
| 4     |                | F                   | -354.4653120                               | -354.3935180                              | -354.4223120      |
| 5     |                | C(O)CH <sub>3</sub> | -407.8778259                               | -407.7612160                              | -407.7946280      |
| 6     |                | CN                  | -347.4706341                               | -347.3924620                              | -347.4227550      |
| 7     |                | NO <sub>2</sub>     | -459.7308218                               | -459.6487320                              | -459.6807050      |

| Entry | R <sub>1</sub>      | R <sub>2</sub>      | Butadiene [Product], (Hartree) |                                           |                   |
|-------|---------------------|---------------------|--------------------------------|-------------------------------------------|-------------------|
|       |                     |                     | Total Electronic Energy        | Sum of Electronic and Zero-Point Energies | Gibbs Free Energy |
| 1     | C(O)CH <sub>3</sub> | CH <sub>3</sub>     | -347.9635844                   | -347.8119750                              | -347.8470650      |
| 2     |                     | NH <sub>2</sub>     | -364.0116132                   | -363.8707280                              | -363.9044720      |
| 3     |                     | OH                  | -383.8745303                   | -383.7463400                              | -383.7804360      |
| 4     |                     | F                   | -407.8938486                   | -407.7784870                              | -407.8128000      |
| 5     |                     | C(O)CH <sub>3</sub> | -461.2895212                   | -461.1292680                              | -461.1676670      |
| 6     |                     | CN                  | -400.8892038                   | -400.7672390                              | -400.8025530      |
| 7     |                     | NO <sub>2</sub>     | -513.1466437                   | -513.0215450                              | -513.0590600      |

| Entry | R <sub>1</sub>      | R <sub>2</sub>      | Transition State, (Hartree) |                                           |                   |
|-------|---------------------|---------------------|-----------------------------|-------------------------------------------|-------------------|
|       |                     |                     | Total Electronic Energy     | Sum of Electronic and Zero-Point Energies | Gibbs Free Energy |
| 1     | C(O)CH <sub>3</sub> | CH <sub>3</sub>     | -347.9032526                | -347.7537840                              | -347.7879690      |
| 2     |                     | NH <sub>2</sub>     | -363.9497372                | -363.8106480                              | -363.8440240      |
| 3     |                     | OH                  | -383.8053623                | -383.6792760                              | -383.7126470      |
| 4     |                     | F                   | -407.8230982                | -407.7092160                              | -407.7424420      |
| 5     |                     | C(O)CH <sub>3</sub> | -461.2313200                | -461.0722140                              | -461.1092740      |
| 6     |                     | CN                  | -400.8270336                | -400.7066920                              | -400.7413890      |
| 7     |                     | NO <sub>2</sub>     | -513.0898076                | -512.9655160                              | -513.0016640      |

| Entry | R <sub>1</sub>      | R <sub>2</sub>      | Cyclobutene [Starting Material], (Hartree) |                                           |                   |
|-------|---------------------|---------------------|--------------------------------------------|-------------------------------------------|-------------------|
|       |                     |                     | Total Electronic Energy                    | Sum of Electronic and Zero-Point Energies | Gibbs Free Energy |
| 1     | C(O)CH <sub>3</sub> | CH <sub>3</sub>     | -347.9518105                               | -347.7997030                              | -347.8336730      |
| 2     |                     | NH <sub>2</sub>     | -363.9930521                               | -363.8515130                              | -363.8847750      |
| 3     |                     | OH                  | -383.8538143                               | -383.7250920                              | -383.7586270      |
| 4     |                     | F                   | -407.8726209                               | -407.7559150                              | -407.7889600      |
| 5     |                     | C(O)CH <sub>3</sub> | -461.2822382                               | -461.1208140                              | -461.1585560      |
| 6     |                     | CN                  | -400.8763869                               | -400.7534030                              | -400.7880580      |
| 7     |                     | NO <sub>2</sub>     | -513.1389257                               | -513.0119740                              | -513.0480150      |

| Entry | R <sub>1</sub> | R <sub>2</sub>      | Butadiene [Product], (Hartree) |                                           |                   |
|-------|----------------|---------------------|--------------------------------|-------------------------------------------|-------------------|
|       |                |                     | Total Electronic Energy        | Sum of Electronic and Zero-Point Energies | Gibbs Free Energy |
| 1     | CN             | CH <sub>3</sub>     | -287.5655841                   | -287.4532220                              | -287.4851940      |
| 2     |                | NH <sub>2</sub>     | -303.6127084                   | -303.5110330                              | -303.5424930      |
| 3     |                | OH                  | -323.4677805                   | -323.3789190                              | -323.4103430      |
| 4     |                | F                   | -347.4857252                   | -347.4092940                              | -347.4409050      |
| 5     |                | C(O)CH <sub>3</sub> | -400.8897269                   | -400.7678770                              | -400.8031690      |
| 6     |                | CN                  | -340.4812936                   | -340.3983900                              | -340.4311750      |
| 7     |                | NO <sub>2</sub>     | -452.7401778                   | -452.6533940                              | -452.6882500      |

| Entry | R <sub>1</sub> | R <sub>2</sub>      | Transition State, (Hartree) |                                           |                   |
|-------|----------------|---------------------|-----------------------------|-------------------------------------------|-------------------|
|       |                |                     | Total Electronic Energy     | Sum of Electronic and Zero-Point Energies | Gibbs Free Energy |
| 1     | CN             | CH <sub>3</sub>     | -287.4991006                | -287.3882230                              | -287.4194520      |
| 2     |                | NH <sub>2</sub>     | -303.5433766                | -303.4431640                              | -303.4736420      |
| 3     |                | OH                  | -323.4019116                | -323.3142160                              | -323.3445320      |
| 4     |                | F                   | -347.4180351                | -347.3426380                              | -347.3728680      |
| 5     |                | C(O)CH <sub>3</sub> | -400.8283886                | -400.7080750                              | -400.7426480      |
| 6     |                | CN                  | -340.4198538                | -340.3380600                              | -340.3697720      |
| 7     |                | NO <sub>2</sub>     | -452.6814320                | -452.5957610                              | -452.6289840      |

| Entry | R <sub>1</sub> | R <sub>2</sub>      | Cyclobutene [Starting Material], (Hartree) |                                           |                   |
|-------|----------------|---------------------|--------------------------------------------|-------------------------------------------|-------------------|
|       |                |                     | Total Electronic Energy                    | Sum of Electronic and Zero-Point Energies | Gibbs Free Energy |
| 1     | CN             | CH <sub>3</sub>     | -287.5487916                               | -287.4351690                              | -287.4661320      |
| 2     |                | NH <sub>2</sub>     | -303.5886930                               | -303.4858390                              | -303.5163930      |
| 3     |                | OH                  | -323.4494611                               | -323.3591240                              | -323.3894530      |
| 4     |                | F                   | -347.4652915                               | -347.3870830                              | -347.4173020      |
| 5     |                | C(O)CH <sub>3</sub> | -400.8784590                               | -400.7554470                              | -400.7901780      |
| 6     |                | CN                  | -340.4687163                               | -340.3842240                              | -340.4159590      |
| 7     |                | NO <sub>2</sub>     | -452.7295205                               | -452.6410870                              | -452.6743970      |

| Entry | R <sub>1</sub>  | R <sub>2</sub>      | Butadiene [Product], (Hartree) |                                           |                   |
|-------|-----------------|---------------------|--------------------------------|-------------------------------------------|-------------------|
|       |                 |                     | Total Electronic Energy        | Sum of Electronic and Zero-Point Energies | Gibbs Free Energy |
| 1     | NO <sub>2</sub> | CH <sub>3</sub>     | -399.8252618                   | -399.7086610                              | -399.7423990      |
| 2     |                 | NH <sub>2</sub>     | -415.8827811                   | -415.7767560                              | -415.8093490      |
| 3     |                 | OH                  | -435.7253746                   | -435.6322680                              | -435.6654910      |
| 4     |                 | F                   | -459.7413522                   | -459.6608010                              | -459.6942770      |
| 5     |                 | C(O)CH <sub>3</sub> | -513.1499682                   | -513.0245460                              | -513.0614760      |
| 6     |                 | CN                  | -452.7389122                   | -452.6519800                              | -452.6864810      |
| 7     |                 | NO <sub>2</sub>     | -564.9971149                   | -564.9063610                              | -564.9434730      |

| Entry | R <sub>1</sub>  | R <sub>2</sub>      | Transition State, (Hartree) |                                           |                   |
|-------|-----------------|---------------------|-----------------------------|-------------------------------------------|-------------------|
|       |                 |                     | Total Electronic Energy     | Sum of Electronic and Zero-Point Energies | Gibbs Free Energy |
| 1     | NO <sub>2</sub> | CH <sub>3</sub>     | -399.7651843                | -399.6500470                              | -399.6827220      |
| 2     |                 | NH <sub>2</sub>     | -415.8108911                | -415.7063060                              | -415.7382930      |
| 3     |                 | OH                  | -435.6653758                | -435.5737240                              | -435.6057530      |
| 4     |                 | F                   | -459.6807272                | -459.6012630                              | -459.6331890      |
| 5     |                 | C(O)CH <sub>3</sub> | -513.0939988                | -512.9694440                              | -513.0052960      |
| 6     |                 | CN                  | -452.6829277                | -452.5971270                              | -452.6305450      |
| 7     |                 | NO <sub>2</sub>     | -564.9425995                | -564.8529750                              | -564.8877650      |

| Entry | R <sub>1</sub>  | R <sub>2</sub>      | Cyclobutene [Starting Material], (Hartree) |                                           |                   |
|-------|-----------------|---------------------|--------------------------------------------|-------------------------------------------|-------------------|
|       |                 |                     | Total Electronic Energy                    | Sum of Electronic and Zero-Point Energies | Gibbs Free Energy |
| 1     | NO <sub>2</sub> | CH <sub>3</sub>     | -399.8163703                               | -399.6986310                              | -399.7321700      |
| 2     |                 | NH <sub>2</sub>     | -415.8576339                               | -415.7505180                              | -415.7830830      |
| 3     |                 | OH                  | -435.7166248                               | -435.6221520                              | -435.6545560      |
| 4     |                 | F                   | -459.7318108                               | -459.6494980                              | -459.6819200      |
| 5     |                 | C(O)CH <sub>3</sub> | -513.1448585                               | -513.0177950                              | -513.0546620      |
| 6     |                 | CN                  | -452.7349975                               | -452.6464350                              | -452.6808270      |
| 7     |                 | NO <sub>2</sub>     | -564.9965162                               | -564.9039820                              | -564.9394240      |



## 5.3.2 1,3-Disubstituted butadienes

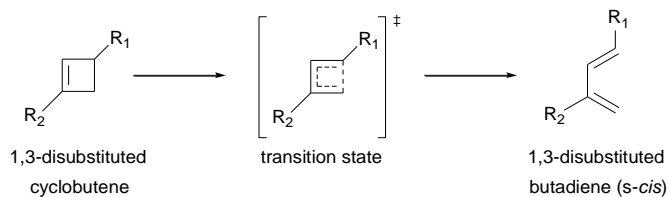

| Entry | R <sub>1</sub>  | R <sub>2</sub>      | Butadiene [Product], (Hartree) |                                           |                   |
|-------|-----------------|---------------------|--------------------------------|-------------------------------------------|-------------------|
|       |                 |                     | Total Electronic Energy        | Sum of Electronic and Zero-Point Energies | Gibbs Free Energy |
| 1     | CH <sub>3</sub> | CH <sub>3</sub>     | -234.6351908                   | -234.4937380                              | -234.5248950      |
| 2     |                 | NH <sub>2</sub>     | -250.6756023                   | -250.5449710                              | -250.5756790      |
| 3     |                 | OH                  | -270.5385510                   | -270.4208630                              | -270.4516150      |
| 4     |                 | F                   | -294.5614371                   | -294.4559890                              | -294.4867130      |
| 5     |                 | C(O)CH <sub>3</sub> | -347.9681674                   | -347.8169590                              | -347.8516930      |
| 6     |                 | CN                  | -287.5613741                   | -287.4491240                              | -287.4812360      |
| 7     |                 | NO <sub>2</sub>     | -399.8265229                   | -399.7103010                              | -399.7442770      |

| Entry | R <sub>1</sub>  | R <sub>2</sub>      | Transition State, (Hartree) |                                           |                   |
|-------|-----------------|---------------------|-----------------------------|-------------------------------------------|-------------------|
|       |                 |                     | Total Electronic Energy     | Sum of Electronic and Zero-Point Energies | Gibbs Free Energy |
| 1     | CH <sub>3</sub> | CH <sub>3</sub>     | -234.5671286                | -234.4277270                              | -234.4590450      |
| 2     |                 | NH <sub>2</sub>     | -250.6096221                | -250.4808650                              | -250.5112620      |
| 3     |                 | OH                  | -270.4728879                | -270.3566000                              | -270.3868830      |
| 4     |                 | F                   | -294.4926520                | -294.3886620                              | -294.4190520      |
| 5     |                 | C(O)CH <sub>3</sub> | -347.9043304                | -347.7551400                              | -347.7896710      |
| 6     |                 | CN                  | -287.4970919                | -287.3863920                              | -287.4178630      |
| 7     |                 | NO <sub>2</sub>     | -399.7627305                | -399.6480610                              | -399.6811070      |

| Entry | R <sub>1</sub>  | R <sub>2</sub>      | Cyclobutene [Starting Material], (Hartree) |                                           |                   |
|-------|-----------------|---------------------|--------------------------------------------|-------------------------------------------|-------------------|
|       |                 |                     | Total Electronic Energy                    | Sum of Electronic and Zero-Point Energies | Gibbs Free Energy |
| 1     | CH <sub>3</sub> | CH <sub>3</sub>     | -234.6209556                               | -234.4782170                              | -234.5081490      |
| 2     |                 | NH <sub>2</sub>     | -250.6611474                               | -250.5291700                              | -250.5586750      |
| 3     |                 | OH                  | -270.5234144                               | -270.4040940                              | -270.4335680      |
| 4     |                 | F                   | -294.5433697                               | -294.4359390                              | -294.4651210      |
| 5     |                 | C(O)CH <sub>3</sub> | -347.9550356                               | -347.8027150                              | -347.8371340      |
| 6     |                 | CN                  | -287.5484949                               | -287.4345790                              | -287.4653030      |
| 7     |                 | NO <sub>2</sub>     | -399.8113344                               | -399.6934170                              | -399.7257930      |



| Entry | R <sub>1</sub>  | R <sub>2</sub>      | Butadiene [Product], (Hartree) |                                           |                   |
|-------|-----------------|---------------------|--------------------------------|-------------------------------------------|-------------------|
|       |                 |                     | Total Electronic Energy        | Sum of Electronic and Zero-Point Energies | Gibbs Free Energy |
| 1     | NH <sub>2</sub> | CH <sub>3</sub>     | -250.6743788                   | -250.5438220                              | -250.5747150      |
| 2     |                 | NH <sub>2</sub>     | -266.7139827                   | -266.5944470                              | -266.6249320      |
| 3     |                 | OH                  | -286.5792110                   | -286.4723330                              | -286.5026780      |
| 4     |                 | F                   | -310.6022493                   | -310.5077540                              | -310.5381080      |
| 5     |                 | C(O)CH <sub>3</sub> | -364.0093873                   | -363.8687920                              | -363.9029290      |
| 6     |                 | CN                  | -303.6024046                   | -303.5011840                              | -303.5330610      |
| 7     |                 | NO <sub>2</sub>     | -415.8690381                   | -415.7635320                              | -415.7970180      |

| Entry | R <sub>1</sub>  | R <sub>2</sub>      | Transition State, (Hartree) |                                           |                   |
|-------|-----------------|---------------------|-----------------------------|-------------------------------------------|-------------------|
|       |                 |                     | Total Electronic Energy     | Sum of Electronic and Zero-Point Energies | Gibbs Free Energy |
| 1     | NH <sub>2</sub> | CH <sub>3</sub>     | -250.6177641                | -250.4885540                              | -250.5184120      |
| 2     |                 | NH <sub>2</sub>     | -266.6620638                | -266.5434220                              | -266.5725670      |
| 3     |                 | OH                  | -286.5257290                | -286.4196450                              | -286.4486710      |
| 4     |                 | F                   | -310.5452982                | -310.4515100                              | -310.4804520      |
| 5     |                 | C(O)CH <sub>3</sub> | -363.9536681                | -363.8147370                              | -363.8481030      |
| 6     |                 | CN                  | -303.5479449                | -303.4475950                              | -303.4780030      |
| 7     |                 | NO <sub>2</sub>     | -415.8136075                | -415.7092540                              | -415.7412710      |

| Entry | R <sub>1</sub>  | R <sub>2</sub>      | Cyclobutene [Starting Material], (Hartree) |                                           |                   |
|-------|-----------------|---------------------|--------------------------------------------|-------------------------------------------|-------------------|
|       |                 |                     | Total Electronic Energy                    | Sum of Electronic and Zero-Point Energies | Gibbs Free Energy |
| 1     | NH <sub>2</sub> | CH <sub>3</sub>     | -250.6519972                               | -250.5202680                              | -250.5502180      |
| 2     |                 | NH <sub>2</sub>     | -266.6936481                               | -266.5726780                              | -266.6022860      |
| 3     |                 | OH                  | -286.5553354                               | -286.4470020                              | -286.4764990      |
| 4     |                 | F                   | -310.5745104                               | -310.4781010                              | -310.5072610      |
| 5     |                 | C(O)CH <sub>3</sub> | -363.9849403                               | -363.8436760                              | -363.8779870      |
| 6     |                 | CN                  | -303.5780884                               | -303.4752840                              | -303.5060350      |
| 7     |                 | NO <sub>2</sub>     | -415.8408927                               | -415.7340620                              | -415.7664390      |

| Entry | R <sub>1</sub> | R <sub>2</sub>      | Butadiene [Product], (Hartree) |                                           |                   |
|-------|----------------|---------------------|--------------------------------|-------------------------------------------|-------------------|
|       |                |                     | Total Electronic Energy        | Sum of Electronic and Zero-Point Energies | Gibbs Free Energy |
| 1     | OH             | CH <sub>3</sub>     | -270.5354428                   | -270.4175670                              | -270.4482970      |
| 2     |                | NH <sub>2</sub>     | -286.5744392                   | -286.4677230                              | -286.4981750      |
| 3     |                | OH                  | -306.4393926                   | -306.3451280                              | -306.3753590      |
| 4     |                | F                   | -330.4615823                   | -330.3795990                              | -330.4097510      |
| 5     |                | C(O)CH <sub>3</sub> | -383.8680011                   | -383.7403780                              | -383.7746080      |
| 6     |                | CN                  | -323.4612478                   | -323.3725000                              | -323.4040740      |
| 7     |                | NO <sub>2</sub>     | -435.7265513                   | -435.6338350                              | -435.6672350      |

| Entry | R <sub>1</sub> | R <sub>2</sub>      | Transition State, (Hartree) |                                           |                   |
|-------|----------------|---------------------|-----------------------------|-------------------------------------------|-------------------|
|       |                |                     | Total Electronic Energy     | Sum of Electronic and Zero-Point Energies | Gibbs Free Energy |
| 1     | OH             | CH <sub>3</sub>     | -270.4782233                | -270.3615260                              | -270.3913580      |
| 2     |                | NH <sub>2</sub>     | -286.5226133                | -286.4164420                              | -286.4454520      |
| 3     |                | OH                  | -306.3852559                | -306.2915850                              | -306.3204590      |
| 4     |                | F                   | -330.4041907                | -330.3228320                              | -330.3516200      |
| 5     |                | C(O)CH <sub>3</sub> | -383.8134235                | -383.6870770                              | -383.7203990      |
| 6     |                | CN                  | -323.4064838                | -323.3186020                              | -323.3488590      |
| 7     |                | NO <sub>2</sub>     | -435.6716083                | -435.5797460                              | -435.6116180      |

| Entry | R <sub>1</sub> | R <sub>2</sub>      | Cyclobutene [Starting Material], (Hartree) |                                           |                   |
|-------|----------------|---------------------|--------------------------------------------|-------------------------------------------|-------------------|
|       |                |                     | Total Electronic Energy                    | Sum of Electronic and Zero-Point Energies | Gibbs Free Energy |
| 1     | OH             | CH <sub>3</sub>     | -270.5201120                               | -270.4012450                              | -270.4309940      |
| 2     |                | NH <sub>2</sub>     | -286.5625024                               | -286.4542780                              | -286.4835360      |
| 3     |                | OH                  | -306.4232291                               | -306.3276720                              | -306.3568640      |
| 4     |                | F                   | -330.4416790                               | -330.3581720                              | -330.3871550      |
| 5     |                | C(O)CH <sub>3</sub> | -383.8521961                               | -383.7238690                              | -383.7581220      |
| 6     |                | CN                  | -323.4449196                               | -323.3550120                              | -323.3855540      |
| 7     |                | NO <sub>2</sub>     | -435.7067893                               | -435.6129450                              | -435.6452350      |

| Entry | R <sub>1</sub> | R <sub>2</sub>      | Butadiene [Product], (Hartree) |                                           |                   |
|-------|----------------|---------------------|--------------------------------|-------------------------------------------|-------------------|
|       |                |                     | Total Electronic Energy        | Sum of Electronic and Zero-Point Energies | Gibbs Free Energy |
| 1     | F              | CH <sub>3</sub>     | -294.5557640                   | -294.4499600                              | -294.4804480      |
| 2     |                | NH <sub>2</sub>     | -310.5959178                   | -310.5009750                              | -310.5310290      |
| 3     |                | OH                  | -330.4580367                   | -330.3760220                              | -330.4061110      |
| 4     |                | F                   | -354.4797227                   | -354.4099160                              | -354.4398980      |
| 5     |                | C(O)CH <sub>3</sub> | -407.8876594                   | -407.7722000                              | -407.8062210      |
| 6     |                | CN                  | -347.4789608                   | -347.4023690                              | -347.4337530      |
| 7     |                | NO <sub>2</sub>     | -459.7439990                   | -459.6634690                              | -459.6966180      |

| Entry | R <sub>1</sub> | R <sub>2</sub>      | Transition State, (Hartree) |                                           |                   |
|-------|----------------|---------------------|-----------------------------|-------------------------------------------|-------------------|
|       |                |                     | Total Electronic Energy     | Sum of Electronic and Zero-Point Energies | Gibbs Free Energy |
| 1     | F              | CH <sub>3</sub>     | -294.4984205                | -294.3940250                              | -294.4239310      |
| 2     |                | NH <sub>2</sub>     | -310.5426794                | -310.4490510                              | -310.4780430      |
| 3     |                | OH                  | -330.4044046                | -330.3230630                              | -330.3518700      |
| 4     |                | F                   | -354.4220857                | -354.3530610                              | -354.3817840      |
| 5     |                | C(O)CH <sub>3</sub> | -407.8317468                | -407.7177000                              | -407.7508450      |
| 6     |                | CN                  | -347.4232778                | -347.3477580                              | -347.3779530      |
| 7     |                | NO <sub>2</sub>     | -459.6874727                | -459.6079810                              | -459.6397890      |

| Entry | R <sub>1</sub> | R <sub>2</sub>      | Cyclobutene [Starting Material], (Hartree) |                                           |                   |
|-------|----------------|---------------------|--------------------------------------------|-------------------------------------------|-------------------|
|       |                |                     | Total Electronic Energy                    | Sum of Electronic and Zero-Point Energies | Gibbs Free Energy |
| 1     | F              | CH <sub>3</sub>     | -294.5486126                               | -294.4415020                              | -294.4710480      |
| 2     |                | NH <sub>2</sub>     | -310.5923519                               | -310.4959500                              | -310.5250140      |
| 3     |                | OH                  | -330.4521014                               | -330.3682720                              | -330.3972410      |
| 4     |                | F                   | -354.4691166                               | -354.3973740                              | -354.4261510      |
| 5     |                | C(O)CH <sub>3</sub> | -407.8786328                               | -407.7620670                              | -407.7959560      |
| 6     |                | CN                  | -347.4705715                               | -347.3924260                              | -347.4227310      |
| 7     |                | NO <sub>2</sub>     | -459.7316707                               | -459.6496070                              | -459.6816940      |

| Entry | R <sub>1</sub>      | R <sub>2</sub>      | Butadiene [Product], (Hartree) |                                           |                   |
|-------|---------------------|---------------------|--------------------------------|-------------------------------------------|-------------------|
|       |                     |                     | Total Electronic Energy        | Sum of Electronic and Zero-Point Energies | Gibbs Free Energy |
| 1     | C(O)CH <sub>3</sub> | CH <sub>3</sub>     | -347.9707245                   | -347.8194590                              | -347.8543180      |
| 2     |                     | NH <sub>2</sub>     | -364.0103554                   | -363.8699850                              | -363.9043660      |
| 3     |                     | OH                  | -383.8716473                   | -383.7443400                              | -383.7787900      |
| 4     |                     | F                   | -407.8946946                   | -407.7795460                              | -407.8143550      |
| 5     |                     | C(O)CH <sub>3</sub> | -461.3032763                   | -461.1422120                              | -461.1804420      |
| 6     |                     | CN                  | -400.8934783                   | -400.7714820                              | -400.8072250      |
| 7     |                     | NO <sub>2</sub>     | -513.1585711                   | -513.0326300                              | -513.0702640      |

| Entry | R <sub>1</sub>      | R <sub>2</sub>      | Transition State, (Hartree) |                                           |                   |
|-------|---------------------|---------------------|-----------------------------|-------------------------------------------|-------------------|
|       |                     |                     | Total Electronic Energy     | Sum of Electronic and Zero-Point Energies | Gibbs Free Energy |
| 1     | C(O)CH <sub>3</sub> | CH <sub>3</sub>     | -347.9036599                | -347.7543230                              | -347.7887600      |
| 2     |                     | NH <sub>2</sub>     | -363.9450862                | -363.8065640                              | -363.8401820      |
| 3     |                     | OH                  | -383.8068871                | -383.6807710                              | -383.7142270      |
| 4     |                     | F                   | -407.8255605                | -407.7116880                              | -407.7450300      |
| 5     |                     | C(O)CH <sub>3</sub> | -461.2389562                | -461.0800820                              | -461.1178570      |
| 6     |                     | CN                  | -400.8292578                | -400.7088580                              | -400.7435840      |
| 7     |                     | NO <sub>2</sub>     | -513.0936766                | -512.9694280                              | -513.0057710      |

| Entry | R <sub>1</sub>      | R <sub>2</sub>      | Cyclobutene [Starting Material], (Hartree) |                                           |                   |
|-------|---------------------|---------------------|--------------------------------------------|-------------------------------------------|-------------------|
|       |                     |                     | Total Electronic Energy                    | Sum of Electronic and Zero-Point Energies | Gibbs Free Energy |
| 1     | C(O)CH <sub>3</sub> | CH <sub>3</sub>     | -347.9524293                               | -347.8003780                              | -347.8343200      |
| 2     |                     | NH <sub>2</sub>     | -363.9937242                               | -363.8523570                              | -363.8858060      |
| 3     |                     | OH                  | -383.8547417                               | -383.7261080                              | -383.7595690      |
| 4     |                     | F                   | -407.8733119                               | -407.7566520                              | -407.7898210      |
| 5     |                     | C(O)CH <sub>3</sub> | -461.2842875                               | -461.1227420                              | -461.1607400      |
| 6     |                     | CN                  | -400.8763526                               | -400.7533290                              | -400.7880950      |
| 7     |                     | NO <sub>2</sub>     | -513.1386180                               | -513.0117250                              | -513.0482200      |

| Entry | R <sub>1</sub> | R <sub>2</sub>      | Butadiene [Product], (Hartree) |                                           |                   |
|-------|----------------|---------------------|--------------------------------|-------------------------------------------|-------------------|
|       |                |                     | Total Electronic Energy        | Sum of Electronic and Zero-Point Energies | Gibbs Free Energy |
| 1     | CN             | CH <sub>3</sub>     | -287.5640992                   | -287.4516550                              | -287.4836400      |
| 2     |                | NH <sub>2</sub>     | -303.6035560                   | -303.5020410                              | -303.5335380      |
| 3     |                | OH                  | -323.4643834                   | -323.3759020                              | -323.4074630      |
| 4     |                | F                   | -347.4860808                   | -347.4098020                              | -347.4414820      |
| 5     |                | C(O)CH <sub>3</sub> | -400.8949129                   | -400.7728350                              | -400.8083590      |
| 6     |                | CN                  | -340.4843911                   | -340.4013120                              | -340.4342290      |
| 7     |                | NO <sub>2</sub>     | -452.7489284                   | -452.6619270                              | -452.6967180      |

| Entry | R <sub>1</sub> | R <sub>2</sub>      | Transition State, (Hartree) |                                           |                   |
|-------|----------------|---------------------|-----------------------------|-------------------------------------------|-------------------|
|       |                |                     | Total Electronic Energy     | Sum of Electronic and Zero-Point Energies | Gibbs Free Energy |
| 1     | CN             | CH <sub>3</sub>     | -287.4982895                | -287.3874880                              | -287.4187910      |
| 2     |                | NH <sub>2</sub>     | -303.5412310                | -303.4410270                              | -303.4714860      |
| 3     |                | OH                  | -323.4014525                | -323.3138620                              | -323.3442060      |
| 4     |                | F                   | -347.4187581                | -347.3434450                              | -347.3736880      |
| 5     |                | C(O)CH <sub>3</sub> | -400.8313075                | -400.7109690                              | -400.7456760      |
| 6     |                | CN                  | -340.4209493                | -340.3391630                              | -340.3708710      |
| 7     |                | NO <sub>2</sub>     | -452.6845620                | -452.5988520                              | -452.6321530      |

| Entry | R <sub>1</sub> | R <sub>2</sub>      | Cyclobutene [Starting Material], (Hartree) |                                           |                   |
|-------|----------------|---------------------|--------------------------------------------|-------------------------------------------|-------------------|
|       |                |                     | Total Electronic Energy                    | Sum of Electronic and Zero-Point Energies | Gibbs Free Energy |
| 1     | CN             | CH <sub>3</sub>     | -287.5486733                               | -287.4351290                              | -287.4661070      |
| 2     |                | NH <sub>2</sub>     | -303.5901698                               | -303.4873720                              | -303.5179010      |
| 3     |                | OH                  | -323.4499610                               | -323.3598590                              | -323.3903380      |
| 4     |                | F                   | -347.4673490                               | -347.3891980                              | -347.4193960      |
| 5     |                | C(O)CH <sub>3</sub> | -400.8787470                               | -400.7557870                              | -400.7908910      |
| 6     |                | CN                  | -340.4694074                               | -340.3848970                              | -340.4166330      |
| 7     |                | NO <sub>2</sub>     | -452.7305820                               | -452.6421350                              | -452.6755590      |

| Entry | R <sub>1</sub>  | R <sub>2</sub>      | Butadiene [Product], (Hartree) |                                           |                   |
|-------|-----------------|---------------------|--------------------------------|-------------------------------------------|-------------------|
|       |                 |                     | Total Electronic Energy        | Sum of Electronic and Zero-Point Energies | Gibbs Free Energy |
| 1     | NO <sub>2</sub> | CH <sub>3</sub>     | -399.8283259                   | -399.7117770                              | -399.7455370      |
| 2     |                 | NH <sub>2</sub>     | -415.8674566                   | -415.7618960                              | -415.7951900      |
| 3     |                 | OH                  | -435.7279735                   | -435.6354590                              | -435.6688400      |
| 4     |                 | F                   | -459.7489933                   | -459.6686350                              | -459.7022010      |
| 5     |                 | C(O)CH <sub>3</sub> | -513.1582463                   | -513.0321040                              | -513.0693630      |
| 6     |                 | CN                  | -452.7469382                   | -452.6597600                              | -452.6944470      |
| 7     |                 | NO <sub>2</sub>     | -565.0113259                   | -564.9202620                              | -564.9568420      |

| Entry | R <sub>1</sub>  | R <sub>2</sub>      | Transition State, (Hartree) |                                           |                   |
|-------|-----------------|---------------------|-----------------------------|-------------------------------------------|-------------------|
|       |                 |                     | Total Electronic Energy     | Sum of Electronic and Zero-Point Energies | Gibbs Free Energy |
| 1     | NO <sub>2</sub> | CH <sub>3</sub>     | -399.7655721                | -399.6506580                              | -399.6837690      |
| 2     |                 | NH <sub>2</sub>     | -415.8091387                | -415.7048640                              | -415.7370330      |
| 3     |                 | OH                  | -435.6682931                | -435.5766090                              | -435.6086900      |
| 4     |                 | F                   | -459.6845946                | -459.6052020                              | -459.6371830      |
| 5     |                 | C(O)CH <sub>3</sub> | -513.0972073                | -512.9727740                              | -513.0090870      |
| 6     |                 | CN                  | -452.6857820                | -452.5999250                              | -452.6333800      |
| 7     |                 | NO <sub>2</sub>     | -564.9486505                | -564.8589190                              | -564.8939920      |

| Entry | R <sub>1</sub>  | R <sub>2</sub>      | Cyclobutene [Starting Material], (Hartree) |                                           |                   |
|-------|-----------------|---------------------|--------------------------------------------|-------------------------------------------|-------------------|
|       |                 |                     | Total Electronic Energy                    | Sum of Electronic and Zero-Point Energies | Gibbs Free Energy |
| 1     | NO <sub>2</sub> | CH <sub>3</sub>     | -399.8169404                               | -399.6993360                              | -399.7334270      |
| 2     |                 | NH <sub>2</sub>     | -415.8605987                               | -415.7536960                              | -415.7868070      |
| 3     |                 | OH                  | -435.7194144                               | -435.6250960                              | -435.6580490      |
| 4     |                 | F                   | -459.7354378                               | -459.6531550                              | -459.6859010      |
| 5     |                 | C(O)CH <sub>3</sub> | -513.1458424                               | -513.0188070                              | -513.0563550      |
| 6     |                 | CN                  | -452.7358868                               | -452.6473420                              | -452.6819460      |
| 7     |                 | NO <sub>2</sub>     | -564.9966542                               | -564.9041820                              | -564.9402660      |

## 5.3.3 1,4-Disubstituted butadienes

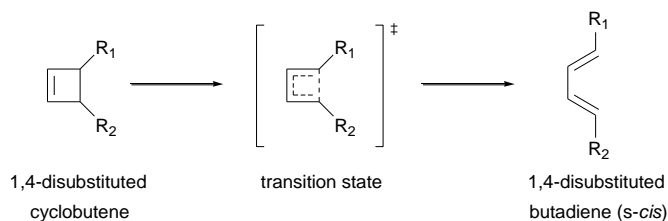

| Entry | R <sub>1</sub>  | R <sub>2</sub>      | Butadiene [Product], (Hartree) |                                           |                   |
|-------|-----------------|---------------------|--------------------------------|-------------------------------------------|-------------------|
|       |                 |                     | Total Electronic Energy        | Sum of Electronic and Zero-Point Energies | Gibbs Free Energy |
| 1     | CH <sub>3</sub> | CH <sub>3</sub>     | -234.6359154                   | -234.4944140                              | -234.5257440      |
| 2     |                 | NH <sub>2</sub>     | -250.6743842                   | -250.5437670                              | -250.5748620      |
| 3     |                 | OH                  | -270.5357303                   | -270.4178030                              | -270.4487060      |
| 4     |                 | F                   | -294.5564868                   | -294.4506260                              | -294.4812810      |
| 5     |                 | C(O)CH <sub>3</sub> | -347.9729971                   | -347.8215760                              | -347.8566650      |
| 6     |                 | CN                  | -287.5662949                   | -287.4537750                              | -287.4860150      |
| 7     |                 | NO <sub>2</sub>     | -399.8309940                   | -399.7143050                              | -399.7483130      |

| Entry | R <sub>1</sub>  | R <sub>2</sub>      | Transition State, (Hartree) |                                           |                   |
|-------|-----------------|---------------------|-----------------------------|-------------------------------------------|-------------------|
|       |                 |                     | Total Electronic Energy     | Sum of Electronic and Zero-Point Energies | Gibbs Free Energy |
| 1     | CH <sub>3</sub> | CH <sub>3</sub>     | -234.5664067                | -234.4269700                              | -234.4586200      |
| 2     |                 | NH <sub>2</sub>     | -250.6148278                | -250.4855690                              | -250.5158600      |
| 3     |                 | OH                  | -270.4760230                | -270.3593210                              | -270.3895020      |
| 4     |                 | F                   | -294.4973344                | -294.3928450                              | -294.4228590      |
| 5     |                 | C(O)CH <sub>3</sub> | -347.9039227                | -347.7545100                              | -347.7888810      |
| 6     |                 | CN                  | -287.4994660                | -287.3885760                              | -287.4199800      |
| 7     |                 | NO <sub>2</sub>     | -399.7673586                | -399.6523190                              | -399.6852420      |

| Entry | R <sub>1</sub>  | R <sub>2</sub>      | Cyclobutene [Starting Material], (Hartree) |                                           |                   |
|-------|-----------------|---------------------|--------------------------------------------|-------------------------------------------|-------------------|
|       |                 |                     | Total Electronic Energy                    | Sum of Electronic and Zero-Point Energies | Gibbs Free Energy |
| 1     | CH <sub>3</sub> | CH <sub>3</sub>     | -234.6142553                               | -234.4712700                              | -234.5009170      |
| 2     |                 | NH <sub>2</sub>     | -250.6447713                               | -250.5128970                              | -250.5426150      |
| 3     |                 | OH                  | -270.5129943                               | -270.3939440                              | -270.4234540      |
| 4     |                 | F                   | -294.5411196                               | -294.4338460                              | -294.4631530      |
| 5     |                 | C(O)CH <sub>3</sub> | -347.9455098                               | -347.7932180                              | -347.8268420      |
| 6     |                 | CN                  | -287.5417026                               | -287.4279430                              | -287.4586160      |
| 7     |                 | NO <sub>2</sub>     | -399.8094494                               | -399.6915910                              | -399.7246140      |

| Entry | R <sub>1</sub>  | R <sub>2</sub>      | Butadiene [Product], (Hartree) |                                           |                   |
|-------|-----------------|---------------------|--------------------------------|-------------------------------------------|-------------------|
|       |                 |                     | Total Electronic Energy        | Sum of Electronic and Zero-Point Energies | Gibbs Free Energy |
| 1     | NH <sub>2</sub> | CH <sub>3</sub>     | -250.6743842                   | -250.5437650                              | -250.5748660      |
| 2     |                 | NH <sub>2</sub>     | -266.7117593                   | -266.5919130                              | -266.6226040      |
| 3     |                 | OH                  | -286.5741956                   | -286.4670610                              | -286.4975820      |
| 4     |                 | F                   | -310.5952335                   | -310.5003690                              | -310.5307860      |
| 5     |                 | C(O)CH <sub>3</sub> | -364.0167708                   | -363.8761250                              | -363.9109890      |
| 6     |                 | CN                  | -303.6102383                   | -303.5084570                              | -303.5404020      |
| 7     |                 | NO <sub>2</sub>     | -415.8772863                   | -415.7715520                              | -415.8056590      |

| Entry | R <sub>1</sub>  | R <sub>2</sub>      | Transition State, (Hartree) |                                           |                   |
|-------|-----------------|---------------------|-----------------------------|-------------------------------------------|-------------------|
|       |                 |                     | Total Electronic Energy     | Sum of Electronic and Zero-Point Energies | Gibbs Free Energy |
| 1     | NH <sub>2</sub> | CH <sub>3</sub>     | -250.6148278                | -250.4855690                              | -250.5158590      |
| 2     |                 | NH <sub>2</sub>     | -266.6567673                | -266.5380440                              | -266.5673000      |
| 3     |                 | OH                  | -286.5200684                | -286.4141080                              | -286.4432770      |
| 4     |                 | F                   | -310.5452323                | -310.4510880                              | -310.4800670      |
| 5     |                 | C(O)CH <sub>3</sub> | -363.9599183                | -363.8206350                              | -363.8542160      |
| 6     |                 | CN                  | -303.5544130                | -303.4536060                              | -303.4840440      |
| 7     |                 | NO <sub>2</sub>     | -415.8246861                | -415.7196490                              | -415.7516050      |

| Entry | R <sub>1</sub>  | R <sub>2</sub>      | Cyclobutene [Starting Material], (Hartree) |                                           |                   |
|-------|-----------------|---------------------|--------------------------------------------|-------------------------------------------|-------------------|
|       |                 |                     | Total Electronic Energy                    | Sum of Electronic and Zero-Point Energies | Gibbs Free Energy |
| 1     | NH <sub>2</sub> | CH <sub>3</sub>     | -250.6447713                               | -250.5128990                              | -250.5426220      |
| 2     |                 | NH <sub>2</sub>     | -266.6785216                               | -266.5573480                              | -266.5869070      |
| 3     |                 | OH                  | -286.5473053                               | -286.4389220                              | -286.4682510      |
| 4     |                 | F                   | -310.5723749                               | -310.4761920                              | -310.5056040      |
| 5     |                 | C(O)CH <sub>3</sub> | -363.9755424                               | -363.8344210                              | -363.8682130      |
| 6     |                 | CN                  | -303.5725979                               | -303.4701430                              | -303.5011570      |
| 7     |                 | NO <sub>2</sub>     | -415.8405217                               | -415.7339220                              | -415.7674850      |



| Entry | R <sub>1</sub> | R <sub>2</sub>      | Butadiene [Product], (Hartree) |                                           |                   |
|-------|----------------|---------------------|--------------------------------|-------------------------------------------|-------------------|
|       |                |                     | Total Electronic Energy        | Sum of Electronic and Zero-Point Energies | Gibbs Free Energy |
| 1     | OH             | CH <sub>3</sub>     | -270.5357303                   | -270.4178020                              | -270.4487050      |
| 2     |                | NH <sub>2</sub>     | -286.5741956                   | -286.4670610                              | -286.4975820      |
| 3     |                | OH                  | -306.4369030                   | -306.3423520                              | -306.3727520      |
| 4     |                | F                   | -330.4561876                   | -330.3739480                              | -330.4041940      |
| 5     |                | C(O)CH <sub>3</sub> | -383.8759720                   | -383.7476320                              | -383.7822370      |
| 6     |                | CN                  | -323.4674960                   | -323.3783230                              | -323.4100330      |
| 7     |                | NO <sub>2</sub>     | -435.7329974                   | -435.6395940                              | -435.6732060      |

| Entry | R <sub>1</sub> | R <sub>2</sub>      | Transition State, (Hartree) |                                           |                   |
|-------|----------------|---------------------|-----------------------------|-------------------------------------------|-------------------|
|       |                |                     | Total Electronic Energy     | Sum of Electronic and Zero-Point Energies | Gibbs Free Energy |
| 1     | OH             | CH <sub>3</sub>     | -270.4760230                | -270.3593210                              | -270.3895030      |
| 2     |                | NH <sub>2</sub>     | -286.5200684                | -286.4141080                              | -286.4432770      |
| 3     |                | OH                  | -306.3839123                | -306.2902280                              | -306.3192400      |
| 4     |                | F                   | -330.4062238                | -330.3246290                              | -330.3534740      |
| 5     |                | C(O)CH <sub>3</sub> | -383.8171419                | -383.6902890                              | -383.7235670      |
| 6     |                | CN                  | -323.4114136                | -323.3230790                              | -323.3533490      |
| 7     |                | NO <sub>2</sub>     | -435.6799311                | -435.5874170                              | -435.6192710      |

| Entry | R <sub>1</sub> | R <sub>2</sub>      | Cyclobutene [Starting Material], (Hartree) |                                           |                   |
|-------|----------------|---------------------|--------------------------------------------|-------------------------------------------|-------------------|
|       |                |                     | Total Electronic Energy                    | Sum of Electronic and Zero-Point Energies | Gibbs Free Energy |
| 1     | OH             | CH <sub>3</sub>     | -270.5129944                               | -270.3939450                              | -270.4234560      |
| 2     |                | NH <sub>2</sub>     | -286.5473053                               | -286.4389230                              | -286.4682530      |
| 3     |                | OH                  | -306.4128641                               | -306.3176540                              | -306.3470230      |
| 4     |                | F                   | -330.4408012                               | -330.3573100                              | -330.3863320      |
| 5     |                | C(O)CH <sub>3</sub> | -383.8439441                               | -383.7155730                              | -383.7492860      |
| 6     |                | CN                  | -323.4402195                               | -323.3503150                              | -323.3807500      |
| 7     |                | NO <sub>2</sub>     | -435.7086370                               | -435.6146100                              | -435.6474180      |

| Entry | R <sub>1</sub> | R <sub>2</sub>      | Butadiene [Product], (Hartree) |                                           |                   |
|-------|----------------|---------------------|--------------------------------|-------------------------------------------|-------------------|
|       |                |                     | Total Electronic Energy        | Sum of Electronic and Zero-Point Energies | Gibbs Free Energy |
| 1     | F              | CH <sub>3</sub>     | -294.5564868                   | -294.4506260                              | -294.4812800      |
| 2     |                | NH <sub>2</sub>     | -310.5952335                   | -310.5003690                              | -310.5307860      |
| 3     |                | OH                  | -330.4561876                   | -330.3739480                              | -330.4041940      |
| 4     |                | F                   | -354.4759562                   | -354.4058010                              | -354.4358150      |
| 5     |                | C(O)CH <sub>3</sub> | -407.8916602                   | -407.7759090                              | -407.8102450      |
| 6     |                | CN                  | -347.4841328                   | -347.4072710                              | -347.4387660      |
| 7     |                | NO <sub>2</sub>     | -459.7481700                   | -459.6671560                              | -459.7004280      |

| Entry | R <sub>1</sub> | R <sub>2</sub>      | Transition State, (Hartree) |                                           |                   |
|-------|----------------|---------------------|-----------------------------|-------------------------------------------|-------------------|
|       |                |                     | Total Electronic Energy     | Sum of Electronic and Zero-Point Energies | Gibbs Free Energy |
| 1     | F              | CH <sub>3</sub>     | -294.4973344                | -294.3928450                              | -294.4228600      |
| 2     |                | NH <sub>2</sub>     | -310.5452322                | -310.4510860                              | -310.4800630      |
| 3     |                | OH                  | -330.4062237                | -330.3246300                              | -330.3534740      |
| 4     |                | F                   | -354.4257427                | -354.3564150                              | -354.3851460      |
| 5     |                | C(O)CH <sub>3</sub> | -407.8311977                | -407.7168870                              | -407.7501140      |
| 6     |                | CN                  | -347.4265294                | -347.3507190                              | -347.3809290      |
| 7     |                | NO <sub>2</sub>     | -459.6930830                | -459.6131700                              | -459.6450440      |

| Entry | R <sub>1</sub> | R <sub>2</sub>      | Cyclobutene [Starting Material], (Hartree) |                                           |                   |
|-------|----------------|---------------------|--------------------------------------------|-------------------------------------------|-------------------|
|       |                |                     | Total Electronic Energy                    | Sum of Electronic and Zero-Point Energies | Gibbs Free Energy |
| 1     | F              | CH <sub>3</sub>     | -294.5411197                               | -294.4338450                              | -294.4631480      |
| 2     |                | NH <sub>2</sub>     | -310.5723749                               | -310.4761930                              | -310.5056070      |
| 3     |                | OH                  | -330.4408012                               | -330.3573100                              | -330.3863320      |
| 4     |                | F                   | -354.4665812                               | -354.3949440                              | -354.4237330      |
| 5     |                | C(O)CH <sub>3</sub> | -407.8684619                               | -407.7519630                              | -407.7853620      |
| 6     |                | CN                  | -347.4644642                               | -347.3864800                              | -347.4167390      |
| 7     |                | NO <sub>2</sub>     | -459.7316444                               | -459.6496270                              | -459.6827810      |

| Entry | R <sub>1</sub>      | R <sub>2</sub>      | Butadiene [Product], (Hartree) |                                           |                   |
|-------|---------------------|---------------------|--------------------------------|-------------------------------------------|-------------------|
|       |                     |                     | Total Electronic Energy        | Sum of Electronic and Zero-Point Energies | Gibbs Free Energy |
| 1     | C(O)CH <sub>3</sub> | CH <sub>3</sub>     | -347.9729971                   | -347.8215770                              | -347.8566710      |
| 2     |                     | NH <sub>2</sub>     | -364.0167708                   | -363.8761240                              | -363.9109880      |
| 3     |                     | OH                  | -383.8759720                   | -383.7476320                              | -383.7822370      |
| 4     |                     | F                   | -407.8916602                   | -407.7759080                              | -407.8102410      |
| 5     |                     | C(O)CH <sub>3</sub> | -461.3052410                   | -461.1441310                              | -461.1828530      |
| 6     |                     | CN                  | -400.8978147                   | -400.7756230                              | -400.8116230      |
| 7     |                     | NO <sub>2</sub>     | -513.1607605                   | -513.0344990                              | -513.0722100      |

| Entry | R <sub>1</sub>      | R <sub>2</sub>      | Transition State, (Hartree) |                                           |                   |
|-------|---------------------|---------------------|-----------------------------|-------------------------------------------|-------------------|
|       |                     |                     | Total Electronic Energy     | Sum of Electronic and Zero-Point Energies | Gibbs Free Energy |
| 1     | C(O)CH <sub>3</sub> | CH <sub>3</sub>     | -347.9039227                | -347.7545100                              | -347.7888810      |
| 2     |                     | NH <sub>2</sub>     | -363.9599183                | -363.8206350                              | -363.8542120      |
| 3     |                     | OH                  | -383.8171419                | -383.6902890                              | -383.7235670      |
| 4     |                     | F                   | -407.8311977                | -407.7168870                              | -407.7501140      |
| 5     |                     | C(O)CH <sub>3</sub> | -461.2372908                | -461.0782280                              | -461.1160850      |
| 6     |                     | CN                  | -400.8285636                | -400.7080250                              | -400.7426630      |
| 7     |                     | NO <sub>2</sub>     | -513.0966329                | -512.9720500                              | -513.0085060      |

| Entry | R <sub>1</sub>      | R <sub>2</sub>      | Cyclobutene [Starting Material], (Hartree) |                                           |                   |
|-------|---------------------|---------------------|--------------------------------------------|-------------------------------------------|-------------------|
|       |                     |                     | Total Electronic Energy                    | Sum of Electronic and Zero-Point Energies | Gibbs Free Energy |
| 1     | C(O)CH <sub>3</sub> | CH <sub>3</sub>     | -347.9455097                               | -347.7932200                              | -347.8268450      |
| 2     |                     | NH <sub>2</sub>     | -363.9755424                               | -363.8344210                              | -363.8682130      |
| 3     |                     | OH                  | -383.8439441                               | -383.7155730                              | -383.7492860      |
| 4     |                     | F                   | -407.8684619                               | -407.7519630                              | -407.7853620      |
| 5     |                     | C(O)CH <sub>3</sub> | -461.2755984                               | -461.1143820                              | -461.1520150      |
| 6     |                     | CN                  | -400.8675451                               | -400.7446510                              | -400.7792940      |
| 7     |                     | NO <sub>2</sub>     | -513.1342062                               | -513.0074310                              | -513.0451330      |

| Entry | R <sub>1</sub> | R <sub>2</sub>      | Butadiene [Product], (Hartree) |                                           |                   |
|-------|----------------|---------------------|--------------------------------|-------------------------------------------|-------------------|
|       |                |                     | Total Electronic Energy        | Sum of Electronic and Zero-Point Energies | Gibbs Free Energy |
| 1     | CN             | CH <sub>3</sub>     | -287.5662949                   | -287.4537740                              | -287.4860120      |
| 2     |                | NH <sub>2</sub>     | -303.6102384                   | -303.5084520                              | -303.5403920      |
| 3     |                | OH                  | -323.4674960                   | -323.3783230                              | -323.4100330      |
| 4     |                | F                   | -347.4841328                   | -347.4072710                              | -347.4387660      |
| 5     |                | C(O)CH <sub>3</sub> | -400.8978147                   | -400.7756220                              | -400.8116190      |
| 6     |                | CN                  | -340.4893639                   | -340.4060240                              | -340.4390450      |
| 7     |                | NO <sub>2</sub>     | -452.7519440                   | -452.6645250                              | -452.6992980      |

| Entry | R <sub>1</sub> | R <sub>2</sub>      | Transition State, (Hartree) |                                           |                   |
|-------|----------------|---------------------|-----------------------------|-------------------------------------------|-------------------|
|       |                |                     | Total Electronic Energy     | Sum of Electronic and Zero-Point Energies | Gibbs Free Energy |
| 1     | CN             | CH <sub>3</sub>     | -287.4994660                | -287.3885760                              | -287.4199810      |
| 2     |                | NH <sub>2</sub>     | -303.5544130                | -303.4536110                              | -303.4840500      |
| 3     |                | OH                  | -323.4114140                | -323.3230830                              | -323.3533500      |
| 4     |                | F                   | -347.4265293                | -347.3507200                              | -347.3809310      |
| 5     |                | C(O)CH <sub>3</sub> | -400.8285636                | -400.7080250                              | -400.7426630      |
| 6     |                | CN                  | -340.4229949                | -340.3410480                              | -340.3727990      |
| 7     |                | NO <sub>2</sub>     | -452.6873695                | -452.6013690                              | -452.6348790      |

| Entry | R <sub>1</sub> | R <sub>2</sub>      | Cyclobutene [Starting Material], (Hartree) |                                           |                   |
|-------|----------------|---------------------|--------------------------------------------|-------------------------------------------|-------------------|
|       |                |                     | Total Electronic Energy                    | Sum of Electronic and Zero-Point Energies | Gibbs Free Energy |
| 1     | CN             | CH <sub>3</sub>     | -287.5417025                               | -287.4279430                              | -287.4586180      |
| 2     |                | NH <sub>2</sub>     | -303.5725979                               | -303.4701430                              | -303.5011570      |
| 3     |                | OH                  | -323.4402195                               | -323.3503150                              | -323.3807500      |
| 4     |                | F                   | -347.4644643                               | -347.3864800                              | -347.4167380      |
| 5     |                | C(O)CH <sub>3</sub> | -400.8675451                               | -400.7446510                              | -400.7792940      |
| 6     |                | CN                  | -340.4617415                               | -340.3774200                              | -340.4091110      |
| 7     |                | NO <sub>2</sub>     | -452.7277645                               | -452.6394720                              | -452.6715590      |

| Entry | R <sub>1</sub>  | R <sub>2</sub>      | Butadiene [Product], (Hartree) |                                           |                   |
|-------|-----------------|---------------------|--------------------------------|-------------------------------------------|-------------------|
|       |                 |                     | Total Electronic Energy        | Sum of Electronic and Zero-Point Energies | Gibbs Free Energy |
| 1     | NO <sub>2</sub> | CH <sub>3</sub>     | -399.8309939                   | -399.7143060                              | -399.7483230      |
| 2     |                 | NH <sub>2</sub>     | -415.8772863                   | -415.7715590                              | -415.8056750      |
| 3     |                 | OH                  | -435.7329974                   | -435.6395940                              | -435.6732060      |
| 4     |                 | F                   | -459.7481698                   | -459.6671550                              | -459.7004320      |
| 5     |                 | C(O)CH <sub>3</sub> | -513.1607606                   | -513.0345000                              | -513.0722140      |
| 6     |                 | CN                  | -452.7519441                   | -452.6645270                              | -452.6993070      |
| 7     |                 | NO <sub>2</sub>     | -565.0139371                   | -564.9225100                              | -564.9590890      |

| Entry | R <sub>1</sub>  | R <sub>2</sub>      | Transition State, (Hartree) |                                           |                   |
|-------|-----------------|---------------------|-----------------------------|-------------------------------------------|-------------------|
|       |                 |                     | Total Electronic Energy     | Sum of Electronic and Zero-Point Energies | Gibbs Free Energy |
| 1     | NO <sub>2</sub> | CH <sub>3</sub>     | -399.7673586                | -399.6523190                              | -399.6852420      |
| 2     |                 | NH <sub>2</sub>     | -415.8246861                | -415.7196480                              | -415.7516050      |
| 3     |                 | OH                  | -435.6799311                | -435.5874170                              | -435.6192770      |
| 4     |                 | F                   | -459.6930828                | -459.6131710                              | -459.6450360      |
| 5     |                 | C(O)CH <sub>3</sub> | -513.0966329                | -512.9720500                              | -513.0085050      |
| 6     |                 | CN                  | -452.6873696                | -452.6013680                              | -452.6348860      |
| 7     |                 | NO <sub>2</sub>     | -564.9508585                | -564.8608640                              | -564.8961680      |

| Entry | R <sub>1</sub>  | R <sub>2</sub>      | Cyclobutene [Starting Material], (Hartree) |                                           |                   |
|-------|-----------------|---------------------|--------------------------------------------|-------------------------------------------|-------------------|
|       |                 |                     | Total Electronic Energy                    | Sum of Electronic and Zero-Point Energies | Gibbs Free Energy |
| 1     | NO <sub>2</sub> | CH <sub>3</sub>     | -399.8094490                               | -399.6915880                              | -399.7245730      |
| 2     |                 | NH <sub>2</sub>     | -415.8405217                               | -415.7339230                              | -415.7674980      |
| 3     |                 | OH                  | -435.7086370                               | -435.6146090                              | -435.6473980      |
| 4     |                 | F                   | -459.7316444                               | -459.6496270                              | -459.6827790      |
| 5     |                 | C(O)CH <sub>3</sub> | -513.1342062                               | -513.0074310                              | -513.0451330      |
| 6     |                 | CN                  | -452.7277645                               | -452.6394720                              | -452.6715590      |
| 7     |                 | NO <sub>2</sub>     | -564.9949230                               | -564.9026000                              | -564.9391110      |

## 5.3.4 2,3-Disubstituted butadienes

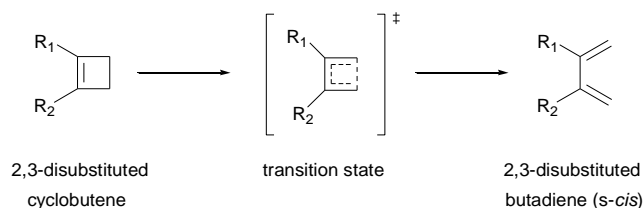

| Entry | R <sub>1</sub>  | R <sub>2</sub>      | Butadiene [Product], (Hartree) |                                           |                   |
|-------|-----------------|---------------------|--------------------------------|-------------------------------------------|-------------------|
|       |                 |                     | Total Electronic Energy        | Sum of Electronic and Zero-Point Energies | Gibbs Free Energy |
| 1     | CH <sub>3</sub> | CH <sub>3</sub>     | -234.6324811                   | -234.4908510                              | -234.5215960      |
| 2     |                 | NH <sub>2</sub>     | -250.6730504                   | -250.5423770                              | -250.5729040      |
| 3     |                 | OH                  | -270.5355160                   | -270.4178910                              | -270.4486510      |
| 4     |                 | F                   | -294.5593409                   | -294.4537810                              | -294.4841550      |
| 5     |                 | C(O)CH <sub>3</sub> | -347.9615921                   | -347.8108730                              | -347.8458040      |
| 6     |                 | CN                  | -287.5594499                   | -287.4472230                              | -287.4790090      |
| 7     |                 | NO <sub>2</sub>     | -399.8218081                   | -399.7056410                              | -399.7391170      |

| Entry | R <sub>1</sub>  | R <sub>2</sub>      | Transition State, (Hartree) |                                           |                   |
|-------|-----------------|---------------------|-----------------------------|-------------------------------------------|-------------------|
|       |                 |                     | Total Electronic Energy     | Sum of Electronic and Zero-Point Energies | Gibbs Free Energy |
| 1     | CH <sub>3</sub> | CH <sub>3</sub>     | -234.5667970                | -234.4273560                              | -234.4584050      |
| 2     |                 | NH <sub>2</sub>     | -250.6092191                | -250.4802510                              | -250.5100350      |
| 3     |                 | OH                  | -270.4717888                | -270.3554080                              | -270.3851640      |
| 4     |                 | F                   | -294.4922832                | -294.3881240                              | -294.4178680      |
| 5     |                 | C(O)CH <sub>3</sub> | -347.9037153                | -347.7542740                              | -347.7880140      |
| 6     |                 | CN                  | -287.4980905                | -287.3874060                              | -287.4189590      |
| 7     |                 | NO <sub>2</sub>     | -399.7641197                | -399.6493760                              | -399.6819660      |

| Entry | R <sub>1</sub>  | R <sub>2</sub>      | Cyclobutene [Starting Material], (Hartree) |                                           |                   |
|-------|-----------------|---------------------|--------------------------------------------|-------------------------------------------|-------------------|
|       |                 |                     | Total Electronic Energy                    | Sum of Electronic and Zero-Point Energies | Gibbs Free Energy |
| 1     | CH <sub>3</sub> | CH <sub>3</sub>     | -234.6266161                               | -234.4840560                              | -234.5143240      |
| 2     |                 | NH <sub>2</sub>     | -250.6653470                               | -250.5335070                              | -250.5634920      |
| 3     |                 | OH                  | -270.5287670                               | -270.4096870                              | -270.4397420      |
| 4     |                 | F                   | -294.5496988                               | -294.4423250                              | -294.4719200      |
| 5     |                 | C(O)CH <sub>3</sub> | -347.9615173                               | -347.8091900                              | -347.8429120      |
| 6     |                 | CN                  | -287.5574633                               | -287.4437020                              | -287.4747840      |
| 7     |                 | NO <sub>2</sub>     | -399.8211254                               | -399.7034350                              | -399.7362070      |

| Entry | R <sub>1</sub>  | R <sub>2</sub>      | Butadiene [Product], (Hartree) |                                           |                   |
|-------|-----------------|---------------------|--------------------------------|-------------------------------------------|-------------------|
|       |                 |                     | Total Electronic Energy        | Sum of Electronic and Zero-Point Energies | Gibbs Free Energy |
| 1     | NH <sub>2</sub> | NH <sub>2</sub>     | -266.7159621                   | -266.5959680                              | -266.6258150      |
| 2     |                 | OH                  | -286.5803862                   | -286.4728210                              | -286.5025260      |
| 3     |                 | F                   | -310.5982570                   | -310.5037430                              | -310.5336550      |
| 4     |                 | C(O)CH <sub>3</sub> | -364.0043637                   | -363.8643720                              | -363.8985520      |
| 5     |                 | CN                  | -303.5984368                   | -303.4973090                              | -303.5287410      |
| 6     |                 | NO <sub>2</sub>     | -415.8613986                   | -415.7559520                              | -415.7890600      |

| Entry | R <sub>1</sub>  | R <sub>2</sub>      | Transition State, (Hartree) |                                           |                   |
|-------|-----------------|---------------------|-----------------------------|-------------------------------------------|-------------------|
|       |                 |                     | Total Electronic Energy     | Sum of Electronic and Zero-Point Energies | Gibbs Free Energy |
| 1     | NH <sub>2</sub> | NH <sub>2</sub>     | -266.6491713                | -266.5310040                              | -266.5603050      |
| 2     |                 | OH                  | -286.5122680                | -286.4064510                              | -286.4355960      |
| 3     |                 | F                   | -310.5321891                | -310.4386060                              | -310.4676200      |
| 4     |                 | C(O)CH <sub>3</sub> | -363.9503898                | -363.8116440                              | -363.8446370      |
| 5     |                 | CN                  | -303.5441730                | -303.4440130                              | -303.4745130      |
| 6     |                 | NO <sub>2</sub>     | -415.8143210                | -415.7100060                              | -415.7416350      |

| Entry | R <sub>1</sub>  | R <sub>2</sub>      | Cyclobutene [Starting Material], (Hartree) |                                           |                   |
|-------|-----------------|---------------------|--------------------------------------------|-------------------------------------------|-------------------|
|       |                 |                     | Total Electronic Energy                    | Sum of Electronic and Zero-Point Energies | Gibbs Free Energy |
| 1     | NH <sub>2</sub> | NH <sub>2</sub>     | -266.6921892                               | -266.5742370                              | -266.6036470      |
| 2     |                 | OH                  | -286.5611928                               | -286.4545070                              | -286.4836030      |
| 3     |                 | F                   | -310.5837994                               | -310.4883450                              | -310.5174530      |
| 4     |                 | C(O)CH <sub>3</sub> | -364.0089290                               | -363.8674200                              | -363.9005370      |
| 5     |                 | CN                  | -303.6032762                               | -303.5008010                              | -303.5312280      |
| 6     |                 | NO <sub>2</sub>     | -415.8750826                               | -415.7679220                              | -415.7998470      |

| Entry | R <sub>1</sub> | R <sub>2</sub>      | Butadiene [Product], (Hartree) |                                           |                   |
|-------|----------------|---------------------|--------------------------------|-------------------------------------------|-------------------|
|       |                |                     | Total Electronic Energy        | Sum of Electronic and Zero-Point Energies | Gibbs Free Energy |
| 1     | OH             | OH                  | -306.4434338                   | -306.3491510                              | -306.3790000      |
| 2     |                | F                   | -330.4589063                   | -330.3771040                              | -330.4069720      |
| 3     |                | C(O)CH <sub>3</sub> | -383.8681277                   | -383.7408370                              | -383.7747700      |
| 4     |                | CN                  | -323.4608971                   | -323.3723960                              | -323.4037250      |
| 5     |                | NO <sub>2</sub>     | -435.7224868                   | -435.6301800                              | -435.6630510      |

| Entry | R <sub>1</sub> | R <sub>2</sub>      | Transition State, (Hartree) |                                           |                   |
|-------|----------------|---------------------|-----------------------------|-------------------------------------------|-------------------|
|       |                |                     | Total Electronic Energy     | Sum of Electronic and Zero-Point Energies | Gibbs Free Energy |
| 1     | OH             | OH                  | -306.3739625                | -306.2809410                              | -306.3099870      |
| 2     |                | F                   | -330.3911852                | -330.3103410                              | -330.3392620      |
| 3     |                | C(O)CH <sub>3</sub> | -383.8115153                | -383.6853290                              | -383.7183890      |
| 4     |                | CN                  | -323.4017002                | -323.3140710                              | -323.3443890      |
| 5     |                | NO <sub>2</sub>     | -435.6648658                | -435.5733570                              | -435.6051880      |

| Entry | R <sub>1</sub> | R <sub>2</sub>      | Cyclobutene [Starting Material], (Hartree) |                                           |                   |
|-------|----------------|---------------------|--------------------------------------------|-------------------------------------------|-------------------|
|       |                |                     | Total Electronic Energy                    | Sum of Electronic and Zero-Point Energies | Gibbs Free Energy |
| 1     | OH             | OH                  | -306.4240683                               | -306.3293530                              | -306.3593220      |
| 2     |                | F                   | -330.4451608                               | -330.3615190                              | -330.3909540      |
| 3     |                | C(O)CH <sub>3</sub> | -383.8685617                               | -383.7394640                              | -383.7729930      |
| 4     |                | CN                  | -323.4598842                               | -323.3692280                              | -323.3996660      |
| 5     |                | NO <sub>2</sub>     | -435.7217429                               | -435.6270210                              | -435.6589210      |



| Entry | R <sub>1</sub> | R <sub>2</sub>      | Butadiene [Product], (Hartree) |                                           |                   |
|-------|----------------|---------------------|--------------------------------|-------------------------------------------|-------------------|
|       |                |                     | Total Electronic Energy        | Sum of Electronic and Zero-Point Energies | Gibbs Free Energy |
| 1     | F              | F                   | -354.4782489                   | -354.4087740                              | -354.4386040      |
| 2     |                | C(O)CH <sub>3</sub> | -407.8882098                   | -407.7732300                              | -407.8070550      |
| 3     |                | CN                  | -347.4792500                   | -347.4030790                              | -347.4343790      |
| 4     |                | NO <sub>2</sub>     | -459.7407515                   | -459.6606860                              | -459.6934860      |

| Entry | R <sub>1</sub> | R <sub>2</sub>      | Transition State, (Hartree) |                                           |                   |
|-------|----------------|---------------------|-----------------------------|-------------------------------------------|-------------------|
|       |                |                     | Total Electronic Energy     | Sum of Electronic and Zero-Point Energies | Gibbs Free Energy |
| 1     | F              | F                   | -354.4091651                | -354.3404530                              | -354.3692220      |
| 2     |                | C(O)CH <sub>3</sub> | -407.8285477                | -407.7147640                              | -407.7477800      |
| 3     |                | CN                  | -347.4173700                | -347.3420700                              | -347.3723100      |
| 4     |                | NO <sub>2</sub>     | -459.6796934                | -459.6004880                              | -459.6322470      |

| Entry | R <sub>1</sub> | R <sub>2</sub>      | Cyclobutene [Starting Material], (Hartree) |                                           |                   |
|-------|----------------|---------------------|--------------------------------------------|-------------------------------------------|-------------------|
|       |                |                     | Total Electronic Energy                    | Sum of Electronic and Zero-Point Energies | Gibbs Free Energy |
| 1     | F              | F                   | -354.4637186                               | -354.3916920                              | -354.4204770      |
| 2     |                | C(O)CH <sub>3</sub> | -407.8843297                               | -407.7675120                              | -407.8010950      |
| 3     |                | CN                  | -347.4749201                               | -347.3964040                              | -347.4266650      |
| 4     |                | NO <sub>2</sub>     | -459.7341134                               | -459.6517080                              | -459.6835980      |

| Entry | R <sub>1</sub>      | R <sub>2</sub>      | Butadiene [Product], (Hartree) |                                           |                   |
|-------|---------------------|---------------------|--------------------------------|-------------------------------------------|-------------------|
|       |                     |                     | Total Electronic Energy        | Sum of Electronic and Zero-Point Energies | Gibbs Free Energy |
| 1     | C(O)CH <sub>3</sub> | C(O)CH <sub>3</sub> | -461.2924416                   | -461.1322950                              | -461.1703030      |
| 2     |                     | CN                  | -400.8868009                   | -400.7651840                              | -400.8005350      |
| 3     |                     | NO <sub>2</sub>     | -513.1510919                   | -513.0256560                              | -513.0626720      |

| Entry | R <sub>1</sub>      | R <sub>2</sub>      | Transition State, (Hartree) |                                           |                   |
|-------|---------------------|---------------------|-----------------------------|-------------------------------------------|-------------------|
|       |                     |                     | Total Electronic Energy     | Sum of Electronic and Zero-Point Energies | Gibbs Free Energy |
| 1     | C(O)CH <sub>3</sub> | C(O)CH <sub>3</sub> | -461.2355083                | -461.0764250                              | -461.1134380      |
| 2     |                     | CN                  | -400.8298668                | -400.7095510                              | -400.7439490      |
| 3     |                     | NO <sub>2</sub>     | -513.0920487                | -512.9678000                              | -513.0036660      |

| Entry | R <sub>1</sub>      | R <sub>2</sub>      | Cyclobutene [Starting Material], (Hartree) |                                           |                   |
|-------|---------------------|---------------------|--------------------------------------------|-------------------------------------------|-------------------|
|       |                     |                     | Total Electronic Energy                    | Sum of Electronic and Zero-Point Energies | Gibbs Free Energy |
| 1     | C(O)CH <sub>3</sub> | C(O)CH <sub>3</sub> | -461.2854982                               | -461.1234040                              | -461.1607210      |
| 2     |                     | CN                  | -400.8860555                               | -400.7629460                              | -400.7977250      |
| 3     |                     | NO <sub>2</sub>     | -513.1445384                               | -513.0174940                              | -513.0544030      |

| Entry | R <sub>1</sub> | R <sub>2</sub>  | Butadiene [Product], (Hartree) |                                           |                   |
|-------|----------------|-----------------|--------------------------------|-------------------------------------------|-------------------|
|       |                |                 | Total Electronic Energy        | Sum of Electronic and Zero-Point Energies | Gibbs Free Energy |
| 1     | CN             | CN              | -340.4778516                   | -340.3950240                              | -340.4277570      |
| 2     |                | NO <sub>2</sub> | -452.7405833                   | -452.6538350                              | -452.6880980      |

| Entry | R <sub>1</sub> | R <sub>2</sub>  | Transition State, (Hartree) |                                           |                   |
|-------|----------------|-----------------|-----------------------------|-------------------------------------------|-------------------|
|       |                |                 | Total Electronic Energy     | Sum of Electronic and Zero-Point Energies | Gibbs Free Energy |
| 1     | CN             | CN              | -340.4183856                | -340.3367060                              | -340.3684390      |
| 2     |                | NO <sub>2</sub> | -452.6804783                | -452.5949170                              | -452.6281670      |

| Entry | R <sub>1</sub> | R <sub>2</sub>  | Cyclobutene [Starting Material], (Hartree) |                                           |                   |
|-------|----------------|-----------------|--------------------------------------------|-------------------------------------------|-------------------|
|       |                |                 | Total Electronic Energy                    | Sum of Electronic and Zero-Point Energies | Gibbs Free Energy |
| 1     | CN             | CN              | -340.4758236                               | -340.3911410                              | -340.4229180      |
| 2     |                | NO <sub>2</sub> | -452.7352720                               | -452.6467870                              | -452.6802320      |

| Entry | R <sub>1</sub>  | R <sub>2</sub>  | Butadiene [Product], (Hartree) |                                           |                   |
|-------|-----------------|-----------------|--------------------------------|-------------------------------------------|-------------------|
|       |                 |                 | Total Electronic Energy        | Sum of Electronic and Zero-Point Energies | Gibbs Free Energy |
| 1     | NO <sub>2</sub> | NO <sub>2</sub> | -565.0054468                   | -564.9147420                              | -564.9501290      |

| Entry | R <sub>1</sub>  | R <sub>2</sub>  | Transition State, (Hartree) |                                           |                   |
|-------|-----------------|-----------------|-----------------------------|-------------------------------------------|-------------------|
|       |                 |                 | Total Electronic Energy     | Sum of Electronic and Zero-Point Energies | Gibbs Free Energy |
| 1     | NO <sub>2</sub> | NO <sub>2</sub> | -564.9383045                | -564.8489710                              | -564.8837910      |

| Entry | R <sub>1</sub>  | R <sub>2</sub>  | Cyclobutene [Starting Material], (Hartree) |                                           |                   |
|-------|-----------------|-----------------|--------------------------------------------|-------------------------------------------|-------------------|
|       |                 |                 | Total Electronic Energy                    | Sum of Electronic and Zero-Point Energies | Gibbs Free Energy |
| 1     | NO <sub>2</sub> | NO <sub>2</sub> | -564.9863494                               | -564.8944090                              | -564.9289600      |

## 6 Cartesian coordinates for

### 6.1 Butadiene

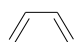

#### Butadiene (Product)

|   |             |             |             |
|---|-------------|-------------|-------------|
| C | 0.72804900  | 0.55279600  | -0.10498400 |
| C | -0.72814800 | 0.55286500  | 0.10497700  |
| C | -1.54954600 | -0.49279200 | -0.07769000 |
| H | -1.16000500 | 1.50560300  | 0.41439300  |
| H | -2.61571700 | -0.41398300 | 0.11653800  |
| H | -1.18661800 | -1.45212900 | -0.43973600 |
| C | 1.54959300  | -0.49274200 | 0.07767500  |
| H | 1.16000300  | 1.50554500  | -0.41433600 |
| H | 2.61572900  | -0.41366700 | -0.11659200 |
| H | 1.18692200  | -1.45213400 | 0.43986000  |

#### Transition state

|   |             |             |             |
|---|-------------|-------------|-------------|
| C | -0.68376900 | 0.73503100  | 0.08458700  |
| C | 0.68376800  | 0.73503100  | -0.08459000 |
| C | 1.06556100  | -0.62765600 | 0.11906700  |
| H | 1.34123200  | 1.54429300  | -0.40024700 |
| H | 1.87767300  | -1.10389600 | -0.44161300 |
| H | 0.87805200  | -1.08464700 | 1.08402500  |
| C | -1.06556100 | -0.62765600 | -0.11906700 |
| H | -1.34123200 | 1.54429000  | 0.40025600  |
| H | -1.87767300 | -1.10389500 | 0.44161400  |
| H | -0.87805200 | -1.08464900 | -1.08402400 |

#### Cyclobutene (Starting material)

|   |             |             |             |
|---|-------------|-------------|-------------|
| C | -0.81532000 | -0.67167500 | 0.00001200  |
| C | -0.81532800 | 0.67166600  | -0.00010500 |
| C | 0.70046700  | 0.78701500  | -0.00002400 |
| H | -1.60358900 | 1.42096600  | -0.00021700 |
| H | 1.14639500  | 1.24731900  | -0.89082800 |

|   |             |             |             |
|---|-------------|-------------|-------------|
| H | 1.14628600  | 1.24746300  | 0.89076000  |
| C | 0.70047600  | -0.78700800 | 0.00010400  |
| H | -1.60357200 | -1.42098500 | 0.00003300  |
| H | 1.14630900  | -1.24730700 | 0.89095800  |
| H | 1.14640200  | -1.24744800 | -0.89063000 |

## 6.2 Monosubstituted butadienes

### 6.2.1 1-Substituted butadienes (outward rotation of substituents)

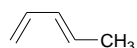

#### Butadiene (Product)

|   |             |             |             |
|---|-------------|-------------|-------------|
| C | 0.72804900  | 0.55279600  | -0.10498400 |
| C | -0.72814800 | 0.55286500  | 0.10497700  |
| C | -1.54954600 | -0.49279200 | -0.07769000 |
| H | -1.16000500 | 1.50560300  | 0.41439300  |
| H | -2.61571700 | -0.41398300 | 0.11653800  |
| H | -1.18661800 | -1.45212900 | -0.43973600 |
| C | 1.54959300  | -0.49274200 | 0.07767500  |
| H | 1.16000300  | 1.50554500  | -0.41433600 |
| H | 2.61572900  | -0.41366700 | -0.11659200 |
| H | 1.18692200  | -1.45213400 | 0.43986000  |

#### Transition state

|   |             |             |             |
|---|-------------|-------------|-------------|
| C | -0.68376900 | 0.73503100  | 0.08458700  |
| C | 0.68376800  | 0.73503100  | -0.08459000 |
| C | 1.06556100  | -0.62765600 | 0.11906700  |
| H | 1.34123200  | 1.54429300  | -0.40024700 |
| H | 1.87767300  | -1.10389600 | -0.44161300 |
| H | 0.87805200  | -1.08464700 | 1.08402500  |
| C | -1.06556100 | -0.62765600 | -0.11906700 |
| H | -1.34123200 | 1.54429000  | 0.40025600  |
| H | -1.87767300 | -1.10389500 | 0.44161400  |
| H | -0.87805200 | -1.08464900 | -1.08402400 |

#### Cyclobutene (Starting material)

|   |             |             |             |
|---|-------------|-------------|-------------|
| C | -0.81532000 | -0.67167500 | 0.00001200  |
| C | -0.81532800 | 0.67166600  | -0.00010500 |
| C | 0.70046700  | 0.78701500  | -0.00002400 |

|   |             |             |             |
|---|-------------|-------------|-------------|
| H | -1.60358900 | 1.42096600  | -0.00021700 |
| H | 1.14639500  | 1.24731900  | -0.89082800 |
| H | 1.14628600  | 1.24746300  | 0.89076000  |
| C | 0.70047600  | -0.78700800 | 0.00010400  |
| H | -1.60357200 | -1.42098500 | 0.00003300  |
| H | 1.14630900  | -1.24730700 | 0.89095800  |
| H | 1.14640200  | -1.24744800 | -0.89063000 |

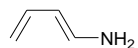

### Butadiene (Product)

|   |             |             |             |
|---|-------------|-------------|-------------|
| C | 0.01757000  | 0.69099400  | -0.04223300 |
| C | -1.42814300 | 0.51659600  | 0.09042300  |
| C | -2.13545200 | -0.61260100 | -0.10355000 |
| H | -1.97751300 | 1.41583300  | 0.37479200  |
| H | -3.20712000 | -0.64137700 | 0.07260000  |
| H | -1.67278200 | -1.53433900 | -0.45012500 |
| C | 0.92724600  | -0.29357800 | 0.13056700  |
| H | 0.37129500  | 1.69544300  | -0.28009200 |
| H | 0.60602100  | -1.28512400 | 0.44440800  |
| N | 2.29150000  | -0.20301100 | -0.11729600 |
| H | 2.89283900  | -0.76876500 | 0.46904200  |
| H | 2.65943400  | 0.73093900  | -0.26079300 |

### Transition state

|   |             |             |             |
|---|-------------|-------------|-------------|
| C | -0.26385000 | 1.02515600  | -0.00781000 |
| C | -1.48151100 | 0.39612500  | -0.05760100 |
| C | -1.17972200 | -1.00700100 | -0.11392200 |
| H | -2.46991300 | 0.84585700  | 0.04553800  |
| H | -1.80847000 | -1.75316100 | 0.38407400  |
| H | -0.68591300 | -1.39008900 | -1.00199000 |
| C | 0.64555600  | -0.02450000 | 0.39023500  |
| H | 0.02258300  | 2.04646600  | -0.25791300 |
| H | 0.56523900  | -0.41338300 | 1.39897200  |
| N | 1.92681100  | -0.12095100 | -0.13393800 |

|   |            |             |             |
|---|------------|-------------|-------------|
| H | 2.03014300 | 0.01187100  | -1.13221400 |
| H | 2.53581700 | -0.83958200 | 0.23568600  |

### Cyclobutene (Starting material)

|   |             |             |             |
|---|-------------|-------------|-------------|
| C | 0.56452500  | -1.04396700 | 0.07911700  |
| C | 1.48906200  | -0.12728400 | -0.24369300 |
| C | 0.58168300  | 1.06068600  | 0.02496100  |
| H | 2.52503200  | -0.19354000 | -0.56843000 |
| H | 0.27976200  | 1.62886700  | -0.86213200 |
| H | 0.90124300  | 1.75493100  | 0.81345700  |
| C | -0.48841200 | -0.01226400 | 0.45302500  |
| H | 0.55298600  | -2.13158300 | 0.09544500  |
| H | -0.69229200 | 0.02091500  | 1.53782700  |
| N | -1.70112800 | -0.02380400 | -0.36667000 |
| H | -2.20663900 | -0.90046300 | -0.24609000 |
| H | -2.33333700 | 0.72447100  | -0.08384800 |

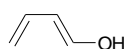

### Butadiene (Product)

|   |             |             |             |
|---|-------------|-------------|-------------|
| C | 0.03517800  | 0.68617200  | -0.07719900 |
| C | -1.40836200 | 0.51146100  | 0.10189500  |
| C | -2.11356900 | -0.61446200 | -0.10442900 |
| H | -1.94782100 | 1.40215300  | 0.42770700  |
| H | -3.18009100 | -0.65538100 | 0.09885100  |
| H | -1.65464800 | -1.52113700 | -0.49296700 |
| C | 0.94114800  | -0.27911100 | 0.14172100  |
| H | 0.39730500  | 1.66865900  | -0.37655000 |
| H | 0.66418700  | -1.26319800 | 0.51690500  |
| O | 2.27541500  | -0.07988700 | -0.10042300 |
| H | 2.79137500  | -0.81636100 | 0.25751100  |

### Transition state

|   |             |            |             |
|---|-------------|------------|-------------|
| C | 0.03517800  | 0.68617200 | -0.07719900 |
| C | -1.40836200 | 0.51146100 | 0.10189500  |



|   |             |             |             |
|---|-------------|-------------|-------------|
| C | -2.11356900 | -0.61446200 | -0.10442900 |
| H | -1.94782100 | 1.40215300  | 0.42770700  |
| H | -3.18009100 | -0.65538100 | 0.09885100  |
| H | -1.65464800 | -1.52113700 | -0.49296700 |
| C | 0.94114800  | -0.27911100 | 0.14172100  |
| H | 0.39730500  | 1.66865900  | -0.37655000 |
| H | 0.66418700  | -1.26319800 | 0.51690500  |
| O | 2.27541500  | -0.07988700 | -0.10042300 |
| H | 2.79137500  | -0.81636100 | 0.25751100  |

### Cyclobutene (Starting material)

|   |             |             |             |
|---|-------------|-------------|-------------|
| C | 0.55204700  | -1.04112500 | 0.06693700  |
| C | 1.48039000  | -0.11192500 | -0.21105600 |
| C | 0.55291200  | 1.07099800  | 0.01545700  |
| H | 2.53412700  | -0.16752600 | -0.47317200 |
| H | 0.26143800  | 1.61261900  | -0.89133200 |
| H | 0.84214300  | 1.79132300  | 0.79325000  |
| C | -0.50750800 | -0.02468200 | 0.42808700  |
| H | 0.54069800  | -2.12748900 | 0.07565000  |
| H | -0.75387900 | 0.00322200  | 1.50047100  |
| O | -1.69389900 | -0.12421800 | -0.34741900 |
| H | -2.34038200 | 0.52199800  | -0.02206200 |

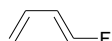

### Butadiene (Product)

|   |             |             |             |
|---|-------------|-------------|-------------|
| C | 0.06680000  | 0.65657500  | -0.09685200 |
| C | -1.38143800 | 0.52292500  | 0.10883500  |
| C | -2.10898900 | -0.58322000 | -0.11127900 |
| H | -1.88930100 | 1.42202800  | 0.45937900  |
| H | -3.17477900 | -0.60577100 | 0.09818000  |
| H | -1.66983400 | -1.49045500 | -0.51996300 |
| C | 0.94312200  | -0.31375300 | 0.16739100  |
| H | 0.45186200  | 1.61104400  | -0.45238500 |
| H | 0.72626600  | -1.28858500 | 0.59090900  |
| F | 2.27097900  | -0.14926900 | -0.06496500 |

**Transition state**

|   |             |             |             |
|---|-------------|-------------|-------------|
| C | -0.16319500 | 1.00958400  | -0.05965900 |
| C | -1.42685200 | 0.45043300  | -0.01871800 |
| C | -1.22637600 | -0.95494000 | -0.12449800 |
| H | -2.37092500 | 0.94692300  | 0.20225000  |
| H | -1.86938800 | -1.67572000 | 0.39042800  |
| H | -0.74440700 | -1.35132400 | -1.01064100 |
| C | 0.64906400  | -0.07441100 | 0.35290600  |
| H | 0.17873500  | 1.99837300  | -0.35567400 |
| H | 0.61730200  | -0.49289300 | 1.35091600  |
| F | 1.91031500  | -0.22326100 | -0.16416200 |

**Cyclobutene (Starting material)**

|   |             |             |             |
|---|-------------|-------------|-------------|
| C | 0.53252000  | -1.04949300 | 0.05025100  |
| C | 1.45762300  | -0.11070300 | -0.21125500 |
| C | 0.52323300  | 1.06756100  | 0.02816000  |
| H | 2.51429600  | -0.15653000 | -0.46237300 |
| H | 0.21890500  | 1.61195400  | -0.87170300 |
| H | 0.80634600  | 1.78542100  | 0.80855300  |
| C | -0.51078600 | -0.03065000 | 0.43781300  |
| H | 0.52726700  | -2.13528100 | 0.05342300  |
| H | -0.81627900 | -0.02007400 | 1.48942300  |
| F | -1.69623000 | -0.03841900 | -0.31634800 |

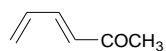**Butadiene (Product)**

|   |             |             |             |
|---|-------------|-------------|-------------|
| C | 0.82819200  | 0.63081700  | -0.06357200 |
| C | 2.28841300  | 0.52427000  | -0.13457900 |
| C | 3.01788400  | -0.55727800 | 0.18699300  |
| H | 2.80923300  | 1.42697900  | -0.45353600 |
| H | 4.10051200  | -0.54974900 | 0.09900000  |
| H | 2.56418700  | -1.47148200 | 0.56191200  |
| C | -0.04818800 | -0.39519200 | -0.11736900 |

|   |             |             |             |
|---|-------------|-------------|-------------|
| H | 0.44164700  | 1.64593200  | 0.02204600  |
| H | 0.29581600  | -1.41862300 | -0.25323500 |
| C | -1.51983600 | -0.26747300 | -0.01644100 |
| O | -2.21570200 | -1.27776800 | -0.05721100 |
| C | -2.15582500 | 1.10562000  | 0.13724600  |
| H | -1.80806200 | 1.60134900  | 1.05178200  |
| H | -1.90135000 | 1.75627000  | -0.70840300 |
| H | -3.24021100 | 0.98687800  | 0.18445600  |

**Transition state**

|   |             |             |             |
|---|-------------|-------------|-------------|
| C | -1.17675300 | -0.88506300 | -0.42543000 |
| C | -2.30862800 | -0.19768200 | -0.07501700 |
| C | -1.83494300 | 1.01156600  | 0.53422300  |
| H | -3.35204200 | -0.43961200 | -0.27175900 |
| H | -2.33428400 | 1.97653800  | 0.39729000  |
| H | -1.24760300 | 0.94518300  | 1.44288800  |
| C | -0.14053400 | 0.11824400  | -0.44844000 |
| H | -1.03054500 | -1.94726000 | -0.60385500 |
| H | -0.23722600 | 0.92895200  | -1.16611500 |
| C | 1.24157100  | -0.16075600 | 0.02365000  |
| O | 1.51221600  | -1.22172900 | 0.57826300  |
| C | 2.29362000  | 0.90913400  | -0.20770800 |
| H | 2.50347800  | 1.00165800  | -1.28201000 |
| H | 1.93849200  | 1.88928500  | 0.13477000  |
| H | 3.21600300  | 0.64643400  | 0.31501300  |

**Cyclobutene (Starting material)**

|   |             |             |             |
|---|-------------|-------------|-------------|
| C | 1.27327900  | 0.46501600  | -0.91375500 |
| C | 2.09921800  | 0.31579600  | 0.13349100  |
| C | 1.23205400  | -0.72077700 | 0.82172100  |
| H | 3.05557400  | 0.75712700  | 0.40277100  |
| H | 0.80346400  | -0.43073900 | 1.78917000  |
| H | 1.65578600  | -1.72730200 | 0.91651700  |
| C | 0.25802700  | -0.56099700 | -0.42379600 |
| H | 1.30381400  | 1.07307800  | -1.81467200 |
| H | 0.18487700  | -1.47342600 | -1.02540800 |
| C | -1.15848400 | -0.12211800 | -0.07904900 |

|   |             |             |             |
|---|-------------|-------------|-------------|
| O | -2.09145500 | -0.90039600 | -0.19876000 |
| C | -1.37136100 | 1.29527100  | 0.41930700  |
| H | -0.58764300 | 1.60566000  | 1.11924400  |
| H | -1.32560600 | 1.98759200  | -0.43217500 |
| H | -2.35502100 | 1.37803600  | 0.88712400  |

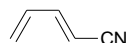

### Butadiene (Product)

|   |             |             |             |
|---|-------------|-------------|-------------|
| C | -0.37143400 | 0.65611600  | -0.04288400 |
| C | -1.82568100 | 0.53029900  | 0.06779600  |
| C | -2.53309500 | -0.59705700 | -0.11396500 |
| H | -2.35923600 | 1.45448600  | 0.28719200  |
| H | -3.61378300 | -0.60472200 | -0.00607400 |
| H | -2.06417600 | -1.53692100 | -0.39589300 |
| C | 0.51899900  | -0.33771200 | 0.17136500  |
| H | 0.01078600  | 1.64271800  | -0.30033200 |
| H | 0.19741900  | -1.32741400 | 0.48776800  |
| C | 1.92507300  | -0.15456800 | 0.01872500  |
| N | 3.07797400  | -0.03008800 | -0.09698300 |

### Transition state

|   |             |             |             |
|---|-------------|-------------|-------------|
| C | 0.66239600  | -1.02192700 | -0.04576600 |
| C | 1.85172600  | -0.34884500 | -0.14918800 |
| C | 1.49628300  | 1.03950100  | -0.13533000 |
| H | 2.86546900  | -0.74523400 | -0.14570300 |
| H | 2.10271900  | 1.79795900  | 0.36946400  |
| H | 0.87344500  | 1.43134200  | -0.93114700 |
| C | -0.24735100 | -0.03842300 | 0.49344800  |
| H | 0.40283000  | -2.03883300 | -0.33079600 |
| H | -0.05430600 | 0.35576900  | 1.48517000  |
| C | -1.61908100 | 0.05300000  | 0.08659700  |
| N | -2.72199900 | 0.15702200  | -0.27793600 |

### Cyclobutene (Starting material)

|   |             |             |             |
|---|-------------|-------------|-------------|
| C | 0.89671100  | -1.05075500 | 0.06086000  |
| C | 1.75570900  | -0.13696700 | -0.41165400 |
| C | 0.91944400  | 1.05880700  | 0.00394500  |
| H | 2.71813500  | -0.20709000 | -0.91034300 |
| H | 0.49883400  | 1.65585700  | -0.81179900 |
| H | 1.35661000  | 1.72925600  | 0.75299900  |
| C | -0.08365000 | -0.01053300 | 0.60537800  |
| H | 0.86607900  | -2.13555800 | 0.08660800  |
| H | -0.14403400 | 0.02575300  | 1.70006100  |
| C | -1.43881000 | -0.01362100 | 0.05676600  |
| N | -2.51315000 | -0.02140100 | -0.38704300 |

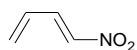

### Butadiene (Product)

|   |             |             |             |
|---|-------------|-------------|-------------|
| C | 0.78138300  | 0.64820800  | -0.05469100 |
| C | 2.23041200  | 0.47473200  | -0.15210000 |
| C | 2.91101500  | -0.63134800 | 0.19149700  |
| H | 2.78204100  | 1.34594600  | -0.50237900 |
| H | 3.99128000  | -0.67794600 | 0.08975700  |
| H | 2.42090100  | -1.50887000 | 0.60625200  |
| C | -0.12001600 | -0.34233400 | -0.13211400 |
| H | 0.40072000  | 1.65997700  | 0.06823800  |
| H | 0.08053000  | -1.39013000 | -0.31028400 |
| N | -1.54197100 | -0.07415200 | 0.00509600  |
| O | -1.92775900 | 1.08384000  | 0.18431300  |
| O | -2.28454600 | -1.05952300 | -0.07216500 |

### Transition state

|   |            |             |             |
|---|------------|-------------|-------------|
| C | 0.99653700 | 0.93510000  | -0.36072300 |
| C | 2.19057600 | 0.32293700  | -0.06274300 |
| C | 1.83974300 | -0.94438400 | 0.49713400  |
| H | 3.20103900 | 0.64932900  | -0.30073900 |
| H | 2.42120400 | -1.85142700 | 0.30696700  |
| H | 1.25033200 | -0.97838300 | 1.40579400  |

|   |             |             |             |
|---|-------------|-------------|-------------|
| C | 0.09510600  | -0.16998100 | -0.44271500 |
| H | 0.75025000  | 1.98223600  | -0.50655800 |
| H | 0.16554400  | -0.93438900 | -1.20507200 |
| N | -1.29941900 | -0.02302100 | -0.01311200 |
| O | -2.06354100 | -0.96549500 | -0.24367300 |
| O | -1.61448600 | 1.01946400  | 0.56938300  |

**Cyclobutene (Starting material)**

|   |             |             |             |
|---|-------------|-------------|-------------|
| C | 2.08336200  | 0.13312300  | -0.24537700 |
| C | 1.26017100  | 0.83002100  | 0.55331600  |
| C | 0.21190500  | -0.25140100 | 0.57651500  |
| H | 1.30979700  | 1.79236800  | 1.05082500  |
| H | 0.01676100  | -0.76666700 | 1.51855000  |
| C | 1.12749500  | -1.03302400 | -0.43696400 |
| H | 3.08659000  | 0.31103500  | -0.62174700 |
| H | 1.45404400  | -2.01966900 | -0.08987600 |
| H | 0.69457100  | -1.12836800 | -1.43877800 |
| N | -1.15283200 | 0.08611000  | 0.01643200  |
| O | -1.28282700 | 1.13602900  | -0.60730300 |
| O | -2.04086500 | -0.74400200 | 0.20493600  |

## 6.2.2 1-Substituted butadienes (intward rotation of substituents)

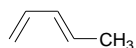

### Butadiene (Product)

|   |             |             |             |
|---|-------------|-------------|-------------|
| C | 1.31971300  | 0.39238900  | 0.19431500  |
| C | 0.05129700  | 1.08213000  | -0.07608200 |
| H | 0.14458100  | 2.15874900  | -0.22446500 |
| H | 2.06585500  | 0.99553900  | 0.71516900  |
| C | -1.19478800 | 0.56862300  | -0.11502600 |
| C | 1.66606200  | -0.85621300 | -0.16237600 |
| H | -2.00453400 | 1.26561500  | -0.33307700 |
| H | 1.00904100  | -1.50115100 | -0.73887700 |
| H | 2.64379200  | -1.25834900 | 0.09037000  |
| C | -1.61625000 | -0.85080200 | 0.14030500  |
| H | -1.78477800 | -1.39597400 | -0.80016200 |
| H | -0.86560900 | -1.40523100 | 0.71282100  |
| H | -2.56455100 | -0.87595900 | 0.69140200  |

### Transition state

|   |             |             |             |
|---|-------------|-------------|-------------|
| C | -1.33798900 | 0.11996900  | -0.41793800 |
| C | -0.45991800 | 1.10075400  | -0.00893000 |
| H | -0.62635800 | 2.17644600  | 0.06523300  |
| H | -2.12280100 | 0.16982200  | -1.17344400 |
| C | 0.68333000  | 0.40298200  | 0.50358900  |
| C | -0.95503800 | -1.04350200 | 0.31223200  |
| H | 1.16403500  | 0.80293100  | 1.40970600  |
| H | -0.97163300 | -1.00931400 | 1.39566800  |
| H | -1.03538100 | -2.05535900 | -0.09973600 |
| C | 1.68735700  | -0.33739400 | -0.36312100 |
| H | 1.23908400  | -0.69056800 | -1.29584700 |
| H | 2.51702800  | 0.34224300  | -0.61780400 |
| H | 2.12957200  | -1.19305000 | 0.16123400  |

### Cyclobutene (Starting material)

|   |            |             |             |
|---|------------|-------------|-------------|
| C | 1.50250800 | -0.12474500 | -0.27247300 |
|---|------------|-------------|-------------|

|   |             |             |             |
|---|-------------|-------------|-------------|
| C | 0.59347000  | -1.04484000 | 0.08779100  |
| H | 0.59311500  | -2.13304500 | 0.10465800  |
| H | 2.52128800  | -0.18559700 | -0.64852100 |
| C | -0.46390600 | -0.01964800 | 0.48167500  |
| C | 0.60381600  | 1.05801900  | 0.04580100  |
| H | -0.65881400 | 0.00727600  | 1.56359600  |
| H | 0.94798500  | 1.72688500  | 0.84567800  |
| H | 0.29980900  | 1.66976200  | -0.81368200 |
| C | -1.78811300 | -0.03169300 | -0.28011100 |
| H | -1.61776400 | -0.03088200 | -1.36423000 |
| H | -2.37704200 | -0.92478400 | -0.03427600 |
| H | -2.39522700 | 0.84783000  | -0.02932600 |

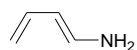

### Butadiene (Product)

|   |             |             |             |
|---|-------------|-------------|-------------|
| C | -1.28512000 | 0.44943300  | -0.12964300 |
| C | 0.01676400  | 1.07742700  | 0.05427700  |
| H | 0.02217600  | 2.16138600  | 0.13565000  |
| H | -2.05806000 | 1.11953000  | -0.51063000 |
| C | 1.23355700  | 0.47667600  | 0.07299400  |
| C | -1.65316800 | -0.82697000 | 0.11573400  |
| H | 2.12247300  | 1.08910400  | 0.20547000  |
| H | -0.99665200 | -1.55665500 | 0.58189200  |
| H | -2.66957100 | -1.15584200 | -0.08265100 |
| N | 1.50154300  | -0.87880200 | -0.02810700 |
| H | 2.42521800  | -1.11885300 | -0.36606300 |
| H | 0.77141700  | -1.44645700 | -0.44709100 |

### Transition state

|   |             |             |             |
|---|-------------|-------------|-------------|
| C | -1.33448200 | 0.17553000  | -0.39559300 |
| C | -0.39616900 | 1.10373800  | -0.01356100 |
| H | -0.50177300 | 2.18566300  | 0.09355500  |
| H | -2.15765800 | 0.28742500  | -1.10303100 |
| C | 0.73290100  | 0.33496400  | 0.46330500  |
| C | -0.98030200 | -1.01898500 | 0.30849500  |



|   |             |             |             |
|---|-------------|-------------|-------------|
| H | 1.25885700  | 0.70215100  | 1.35445800  |
| H | -0.99211200 | -1.00005000 | 1.39269800  |
| H | -1.09795100 | -2.02047800 | -0.11775700 |
| N | 1.65292900  | -0.43871300 | -0.30527300 |
| H | 2.52229100  | 0.07223100  | -0.45825700 |
| H | 1.26615300  | -0.72743400 | -1.20063400 |

### Cyclobutene (Starting material)

|   |             |             |             |
|---|-------------|-------------|-------------|
| C | -1.49080000 | 0.13250300  | -0.23968600 |
| C | -0.56352800 | 1.05647300  | 0.06052000  |
| H | -0.55784700 | 2.14506900  | 0.05942800  |
| H | -2.53072700 | 0.19106100  | -0.55233600 |
| C | 0.49471800  | 0.01810700  | 0.45119300  |
| C | -0.58352000 | -1.05415200 | 0.04693300  |
| H | 0.71104200  | 0.00399900  | 1.52672000  |
| H | -0.89876100 | -1.73971800 | 0.84459000  |
| H | -0.29123800 | -1.64891200 | -0.82684400 |
| N | 1.76867400  | -0.07896900 | -0.25118300 |
| H | 1.63573100  | 0.03044500  | -1.25610200 |
| H | 2.40985600  | 0.65325200  | 0.04906600  |

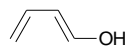

### Butadiene (Product)

|   |             |             |             |
|---|-------------|-------------|-------------|
| C | -1.29875500 | 0.46005200  | 0.00003800  |
| C | 0.03116800  | 1.06352500  | -0.00003400 |
| H | 0.07010000  | 2.15010800  | -0.00011500 |
| H | -2.11575500 | 1.18207700  | 0.00026800  |
| C | 1.23291300  | 0.45684000  | 0.00000800  |
| C | -1.62082400 | -0.84834700 | -0.00005400 |
| H | 2.15618800  | 1.03270800  | -0.00009200 |
| H | -0.87197700 | -1.63224800 | -0.00014000 |
| H | -2.66382300 | -1.15434400 | 0.00008700  |
| O | 1.37984500  | -0.90427500 | -0.00000400 |
| H | 2.31948700  | -1.13651400 | 0.00027600  |

**Transition state**

|   |             |             |             |
|---|-------------|-------------|-------------|
| C | -1.28085800 | 0.22387900  | -0.39714200 |
| C | -0.32096600 | 1.10405700  | 0.05526400  |
| H | -0.38176900 | 2.18209300  | 0.20361400  |
| H | -2.05139900 | 0.39019300  | -1.15238600 |
| C | 0.76612100  | 0.27270300  | 0.47704900  |
| C | -1.03310500 | -1.00885900 | 0.27450000  |
| H | 1.34504100  | 0.49514100  | 1.38548100  |
| H | -1.05405700 | -1.02096900 | 1.35809500  |
| H | -1.21892300 | -1.98126700 | -0.19172200 |
| O | 1.56165900  | -0.32258800 | -0.49633900 |
| H | 2.08067200  | -1.03516200 | -0.09039500 |

**Cyclobutene (Starting material)**

|   |             |             |             |
|---|-------------|-------------|-------------|
| C | 1.46732000  | -0.13104000 | -0.22758900 |
| C | 0.53385700  | -1.05090700 | 0.07112600  |
| H | 0.52280300  | -2.13803600 | 0.09508000  |
| H | 2.51697700  | -0.19985000 | -0.50315800 |
| C | -0.51258800 | -0.01201400 | 0.44579100  |
| C | 0.56155500  | 1.06514100  | 0.02326300  |
| H | -0.75882300 | 0.02329900  | 1.51180800  |
| H | 0.87444100  | 1.77086300  | 0.80435500  |
| H | 0.27222000  | 1.63542500  | -0.86754100 |
| O | -1.76484600 | -0.02072900 | -0.21848500 |
| H | -1.60971200 | -0.15294600 | -1.16821800 |

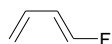**Butadiene (Product)**

|   |             |             |             |
|---|-------------|-------------|-------------|
| C | -1.25708300 | 0.50403500  | -0.00001500 |
| C | 0.10234600  | 1.04735600  | 0.00009800  |
| H | 0.19443800  | 2.13129600  | 0.00013600  |
| H | -2.04008600 | 1.26156600  | -0.00050000 |
| C | 1.27297000  | 0.40053700  | -0.00001300 |
| C | -1.63091700 | -0.78828500 | 0.00007900  |
| H | 2.25267500  | 0.86524900  | -0.00000600 |

|   |             |             |             |
|---|-------------|-------------|-------------|
| H | -0.91760700 | -1.60525300 | 0.00055200  |
| H | -2.68494000 | -1.05219700 | -0.00040600 |
| F | 1.36351400  | -0.95361300 | -0.00007500 |

**Transition state**

|   |             |             |             |
|---|-------------|-------------|-------------|
| C | -1.24799800 | 0.22350100  | -0.39503500 |
| C | -0.28875300 | 1.12234100  | 0.03554700  |
| H | -0.33863500 | 2.20455800  | 0.14916300  |
| H | -1.99976300 | 0.34902600  | -1.17504300 |
| C | 0.77674400  | 0.28735500  | 0.46837000  |
| C | -0.98748200 | -0.98148200 | 0.31580800  |
| H | 1.46713700  | 0.53596400  | 1.27822000  |
| H | -1.00421600 | -0.96166600 | 1.39863100  |
| H | -1.14780900 | -1.97033800 | -0.12243200 |
| F | 1.50091300  | -0.45198100 | -0.45296500 |

**Cyclobutene (Starting material)**

|   |             |             |             |
|---|-------------|-------------|-------------|
| C | 1.45773800  | -0.11066900 | -0.21110500 |
| C | 0.53260500  | -1.04949600 | 0.05013800  |
| H | 0.52732100  | -2.13529300 | 0.05301600  |
| H | 2.51456400  | -0.15642500 | -0.46153900 |
| C | -0.51080400 | -0.03068400 | 0.43756000  |
| C | 0.52326500  | 1.06754700  | 0.02806200  |
| H | -0.81599600 | -0.02009100 | 1.48933600  |
| H | 0.80609300  | 1.78564300  | 0.80834100  |
| H | 0.21907400  | 1.61171100  | -0.87200400 |
| F | -1.69643100 | -0.03841500 | -0.31611900 |

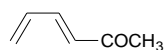**Butadiene (Product)**

|   |            |            |             |
|---|------------|------------|-------------|
| C | 2.15678700 | 0.32222500 | -0.00008100 |
| C | 0.99860800 | 1.21201900 | 0.00005100  |
| H | 1.29509500 | 2.26205000 | 0.00003400  |
| H | 3.10339100 | 0.86307200 | -0.00018700 |

|   |             |             |             |
|---|-------------|-------------|-------------|
| C | -0.35266700 | 1.03896100  | 0.00010200  |
| C | 2.21412100  | -1.02492300 | -0.00003000 |
| H | -0.93843200 | 1.95748700  | 0.00016300  |
| H | 1.32167800  | -1.63807700 | 0.00004500  |
| H | 3.18397300  | -1.51740200 | -0.00021200 |
| C | -1.17504200 | -0.18879200 | 0.00003400  |
| C | -2.67969200 | 0.04083700  | -0.00013000 |
| O | -0.72203100 | -1.33120100 | 0.00013400  |
| H | -2.98161100 | 0.61980200  | -0.88281100 |
| H | -3.19877900 | -0.91972600 | 0.00014700  |
| H | -2.98176000 | 0.62044300  | 0.88207500  |

**Transition state**

|   |             |             |             |
|---|-------------|-------------|-------------|
| C | -1.95224100 | -0.30898100 | -0.14236100 |
| C | -1.41328000 | 0.92326800  | -0.41335600 |
| H | -1.85005500 | 1.76310500  | -0.95084300 |
| H | -2.70724300 | -0.86335500 | -0.69676400 |
| C | -0.11746600 | 0.90279900  | 0.19722900  |
| C | -1.23060800 | -0.80519400 | 0.98854100  |
| H | 0.26416200  | 1.79147600  | 0.71617400  |
| H | -1.25189800 | -0.24326200 | 1.91521300  |
| H | -0.98628800 | -1.86455700 | 1.10734900  |
| C | 0.98588300  | -0.01000600 | -0.25094600 |
| C | 2.28230500  | 0.11996600  | 0.54108800  |
| H | 2.88559400  | -0.78038000 | 0.40223900  |
| H | 2.85507700  | 0.97664300  | 0.16061800  |
| H | 2.10107700  | 0.29112500  | 1.60850400  |
| O | 0.92025100  | -0.75023800 | -1.22295700 |

**Cyclobutene (Starting material)**

|   |             |             |             |
|---|-------------|-------------|-------------|
| C | -2.17956300 | 0.00600100  | -0.27454900 |
| C | -1.42998200 | 0.79603200  | 0.50790100  |
| H | -1.56962900 | 1.78079800  | 0.94281200  |
| H | -3.17406100 | 0.10055700  | -0.70268200 |
| C | -0.26516500 | -0.17368700 | 0.57381200  |
| C | -1.13912000 | -1.09375700 | -0.38476900 |
| H | -0.10531400 | -0.64519400 | 1.55429300  |

|   |             |             |             |
|---|-------------|-------------|-------------|
| H | -1.40326400 | -2.07299500 | 0.03312800  |
| H | -0.71200300 | -1.23744600 | -1.38526200 |
| C | 1.07385200  | 0.25761600  | 0.00124600  |
| C | 2.20964900  | -0.74531100 | 0.11837500  |
| H | 1.87312300  | -1.76295800 | -0.11413200 |
| H | 3.03182800  | -0.46091800 | -0.54254500 |
| H | 2.57702200  | -0.75677600 | 1.15381200  |
| O | 1.23303400  | 1.34669600  | -0.52393900 |

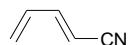

### Butadiene (Product)

|   |             |             |             |
|---|-------------|-------------|-------------|
| C | -1.66599200 | 0.01385500  | -0.00003500 |
| C | -0.71972800 | 1.12836100  | 0.00000400  |
| H | -1.18263800 | 2.11355000  | 0.00002000  |
| H | -2.71096200 | 0.32052600  | -0.00008400 |
| C | 0.63590000  | 1.13522800  | 0.00001500  |
| C | -1.39715600 | -1.30526500 | 0.00002800  |
| H | 1.16116600  | 2.08693200  | 0.00003300  |
| H | -0.39024800 | -1.70863500 | 0.00007600  |
| H | -2.21055600 | -2.02561200 | 0.00001500  |
| C | 1.47617000  | -0.01452700 | 0.00000800  |
| N | 2.19401000  | -0.93323900 | -0.00002600 |

### Transition state

|   |             |             |             |
|---|-------------|-------------|-------------|
| C | 1.51799500  | 0.21360300  | -0.53381900 |
| C | 0.98001900  | -1.00348400 | -0.21076300 |
| H | 1.34685000  | -2.00577100 | -0.42369300 |
| H | 2.15693800  | 0.48057400  | -1.37379800 |
| C | -0.19184900 | -0.70566200 | 0.58098200  |
| C | 0.97176300  | 1.13277400  | 0.41847400  |
| H | -0.44524400 | -1.32909100 | 1.44589400  |
| H | 1.17304100  | 0.98025300  | 1.47228200  |
| H | 0.67951100  | 2.15287000  | 0.15649000  |
| C | -1.35614000 | -0.09132900 | 0.01386100  |
| N | -2.34883200 | 0.34939300  | -0.41279800 |

**Cyclobutene (Starting material)**

|   |             |             |             |
|---|-------------|-------------|-------------|
| C | 1.75551000  | -0.13698000 | -0.41182200 |
| C | 0.89674200  | -1.05073600 | 0.06117000  |
| H | 0.86627200  | -2.13557000 | 0.08629400  |
| H | 2.71759100  | -0.20716900 | -0.91112100 |
| C | -0.08361600 | -0.01047900 | 0.60581400  |
| C | 0.91925400  | 1.05882000  | 0.00394000  |
| H | -0.14461500 | 0.02592100  | 1.70051900  |
| H | 1.35653100  | 1.72970400  | 0.75253400  |
| H | 0.49818600  | 1.65553000  | -0.81183900 |
| C | -1.43843000 | -0.01346200 | 0.05637100  |
| N | -2.51296000 | -0.02162800 | -0.38703200 |

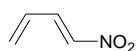**Butadiene (Product)**

|   |             |             |             |
|---|-------------|-------------|-------------|
| C | -2.03424500 | 0.35301000  | -0.03476800 |
| C | -0.84140100 | 1.19386300  | 0.01225800  |
| H | -1.09528900 | 2.25414800  | 0.02812300  |
| H | -2.94552500 | 0.94491200  | -0.10990200 |
| C | 0.50248500  | 1.04050100  | 0.03045200  |
| C | -2.18024500 | -0.98614200 | 0.01566600  |
| H | 1.16039700  | 1.89909800  | 0.05593400  |
| H | -1.34559900 | -1.66725500 | 0.09869000  |
| H | -3.18160000 | -1.40769500 | -0.02520200 |
| N | 1.27909200  | -0.17501200 | 0.00052400  |
| O | 0.71483000  | -1.27488500 | 0.00526700  |
| O | 2.50697000  | -0.02580500 | -0.02938600 |

**Transition state**

|   |             |             |             |
|---|-------------|-------------|-------------|
| C | -1.82291200 | -0.28155700 | -0.24880000 |
| C | -1.24412000 | 0.94233100  | -0.49190700 |
| H | -1.60017000 | 1.77910100  | -1.08887800 |
| H | -2.49820700 | -0.85465300 | -0.88127300 |
| C | -0.02810500 | 0.91054700  | 0.24541800  |

|   |             |             |             |
|---|-------------|-------------|-------------|
| C | -1.25084000 | -0.74950900 | 0.97041700  |
| H | 0.43639400  | 1.77271500  | 0.71966200  |
| H | -1.34641900 | -0.14791800 | 1.86606500  |
| H | -1.03691100 | -1.80640900 | 1.14767000  |
| N | 1.07828500  | -0.02042000 | -0.11146200 |
| O | 0.94233400  | -0.87195700 | -0.98783600 |
| O | 2.12931300  | 0.18061100  | 0.50861400  |

**Cyclobutene (Starting material)**

|   |             |             |             |
|---|-------------|-------------|-------------|
| C | -2.08333900 | 0.13319900  | -0.24530100 |
| C | -1.26013500 | 0.82985400  | 0.55358700  |
| H | -1.30973300 | 1.79208800  | 1.05132200  |
| H | -3.08654000 | 0.31125800  | -0.62166900 |
| C | -0.21187700 | -0.25160300 | 0.57649300  |
| C | -1.12751400 | -1.03295000 | -0.43714800 |
| H | -0.01661800 | -0.76702800 | 1.51841400  |
| H | -1.45411300 | -2.01965500 | -0.09028900 |
| H | -0.69459200 | -1.12806500 | -1.43898200 |
| N | 1.15281500  | 0.08611400  | 0.01639200  |
| O | 1.28259300  | 1.13597300  | -0.60747600 |
| O | 2.04104200  | -0.74377200 | 0.20506000  |

## 6.2.3 2-Substituted butadieness

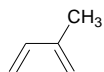**Butadiene (Product)**

|   |             |             |             |
|---|-------------|-------------|-------------|
| C | 0.45563400  | 0.10963500  | -0.05950500 |
| C | -0.85428100 | -0.55138900 | -0.24956900 |
| C | -2.03691800 | -0.10078400 | 0.19382900  |
| H | -0.82661800 | -1.50876800 | -0.77411300 |
| H | -2.95700500 | -0.64589300 | 0.00032700  |
| H | -2.12140600 | 0.81710600  | 0.77111900  |
| C | 0.59750400  | 1.44594400  | -0.08999300 |
| H | -0.24296700 | 2.10542000  | -0.28900600 |
| C | 1.63376300  | -0.81689500 | 0.14468400  |
| H | 2.57060100  | -0.26088500 | 0.25042100  |
| H | 1.49807700  | -1.43739100 | 1.04068500  |
| H | 1.74068800  | -1.50599500 | -0.70460300 |
| H | 1.56441900  | 1.91734500  | 0.06848700  |

**Transition state**

|   |             |             |             |
|---|-------------|-------------|-------------|
| C | 0.44559900  | -0.01579300 | -0.09780300 |
| C | -0.59697600 | -0.92028900 | -0.17369700 |
| C | -1.75451200 | -0.19342800 | 0.23512200  |
| H | -0.58634800 | -1.94386400 | -0.54909100 |
| H | -2.74340900 | -0.36464800 | -0.20534800 |
| H | -1.79060900 | 0.23145000  | 1.23166500  |
| C | -0.20775000 | 1.25843200  | -0.14859900 |
| H | -0.78836000 | 1.52149800  | -1.02530900 |
| C | 1.91670000  | -0.24307400 | 0.11692500  |
| H | 2.52049800  | 0.14946700  | -0.71124700 |
| H | 2.25478000  | 0.27189200  | 1.02807800  |
| H | 2.14465300  | -1.30781800 | 0.23401700  |
| H | 0.17042600  | 2.12693500  | 0.40554500  |



**Cyclobutene (Starting material)**

|   |             |             |             |
|---|-------------|-------------|-------------|
| C | -0.48214800 | 0.05784700  | -0.00045700 |
| C | 0.42693900  | 1.05075300  | -0.00024500 |
| C | 1.62872200  | 0.12195900  | 0.00051400  |
| H | 0.34161000  | 2.13589200  | -0.00130300 |
| H | 2.26742000  | 0.16155400  | 0.89235000  |
| H | 2.27029500  | 0.16173200  | -0.88920000 |
| C | 0.57352600  | -1.04237100 | -0.00033400 |
| H | 0.59314300  | -1.68289300 | -0.89221400 |
| C | -1.97294200 | -0.01528400 | 0.00032000  |
| H | -2.34283300 | -0.55586400 | 0.88284500  |
| H | -2.42249200 | 0.98431200  | -0.00010700 |
| H | -2.34413100 | -0.55693000 | -0.88101800 |
| H | 0.59241200  | -1.68522600 | 0.88986100  |

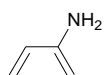**Butadiene (Product)**

|   |             |             |             |
|---|-------------|-------------|-------------|
| C | 0.48371500  | 0.06733800  | -0.05570700 |
| C | -0.85968200 | -0.51358000 | -0.27032600 |
| C | -2.00526000 | -0.00874700 | 0.20691100  |
| H | -0.88148600 | -1.43582300 | -0.85282000 |
| H | -2.96059400 | -0.47867100 | -0.01096000 |
| H | -2.02298400 | 0.88409800  | 0.82712100  |
| C | 0.72180100  | 1.39554800  | -0.07398500 |
| H | -0.06497800 | 2.09713000  | -0.32440100 |
| H | 1.71412700  | 1.80101000  | 0.10857600  |
| N | 1.50073300  | -0.89779900 | 0.06454000  |
| H | 2.40727400  | -0.52453300 | 0.32444600  |
| H | 1.26006900  | -1.70197700 | 0.63490400  |

**Transition state**

|   |             |             |             |
|---|-------------|-------------|-------------|
| C | 0.46682600  | -0.03723900 | -0.09012800 |
| C | -0.59008400 | -0.92689100 | -0.18175300 |
| C | -1.71546600 | -0.15216500 | 0.23321200  |

|   |             |             |             |
|---|-------------|-------------|-------------|
| H | -0.60574800 | -1.93506100 | -0.59120000 |
| H | -2.69848700 | -0.26906400 | -0.23978900 |
| H | -1.77114600 | 0.24710100  | 1.23971400  |
| C | -0.13881600 | 1.26371300  | -0.12123800 |
| H | -0.66566800 | 1.56721600  | -1.01900100 |
| H | 0.28620700  | 2.10119700  | 0.44863400  |
| N | 1.82707400  | -0.29598800 | 0.04814100  |
| H | 2.43516000  | 0.51145400  | 0.09848600  |
| H | 2.09540900  | -1.03543100 | 0.68561900  |

### Cyclobutene (Starting material)

|   |             |             |             |
|---|-------------|-------------|-------------|
| C | 0.50675800  | 0.07086400  | -0.00456100 |
| C | -0.40872300 | 1.06479600  | -0.01442300 |
| C | -1.58970800 | 0.10627900  | -0.00449200 |
| H | -0.34376900 | 2.14919600  | -0.00636800 |
| H | -2.23644600 | 0.11695100  | -0.89208700 |
| H | -2.22628400 | 0.12648800  | 0.89043900  |
| C | -0.51739000 | -1.04473200 | 0.00567000  |
| H | -0.52105200 | -1.67190000 | 0.90644400  |
| H | -0.52723800 | -1.69551000 | -0.87920300 |
| N | 1.88754600  | -0.02569900 | 0.08364700  |
| H | 2.29415700  | -0.84599800 | -0.35151700 |
| H | 2.40219000  | 0.81741800  | -0.14640600 |

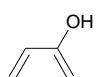

### Butadiene (Product)

|   |             |             |             |
|---|-------------|-------------|-------------|
| C | -0.48330600 | 0.03770500  | 0.03499200  |
| C | 0.86113900  | -0.54920100 | 0.17008100  |
| C | 2.01530200  | 0.05892900  | -0.13254700 |
| H | 0.86855900  | -1.57600600 | 0.53247800  |
| H | 2.96671900  | -0.44330900 | 0.01670200  |
| H | 2.05087100  | 1.06518500  | -0.54269300 |
| C | -0.78566600 | 1.34706100  | 0.07519600  |
| H | -0.01525100 | 2.08843000  | 0.24867800  |
| H | -1.80400300 | 1.70694400  | -0.04966300 |

|   |             |             |             |
|---|-------------|-------------|-------------|
| O | -1.42505900 | -0.95579200 | -0.11685500 |
| H | -2.31123400 | -0.56187300 | -0.15699500 |

**Transition state**

|   |             |             |             |
|---|-------------|-------------|-------------|
| C | 0.47673600  | -0.01849200 | -0.09021700 |
| C | -0.55207400 | -0.93571600 | -0.17276100 |
| C | -1.68897800 | -0.16993400 | 0.22730100  |
| H | -0.55137400 | -1.94383900 | -0.58279600 |
| H | -2.66282500 | -0.28349600 | -0.26285600 |
| H | -1.74978500 | 0.23909000  | 1.22881100  |
| C | -0.11226100 | 1.27739900  | -0.12817300 |
| H | -0.66917400 | 1.56816200  | -1.01093600 |
| H | 0.32067200  | 2.11109300  | 0.43388100  |
| O | 1.82224600  | -0.19011000 | 0.09517100  |
| H | 1.99398200  | -1.08967700 | 0.41563200  |

**Cyclobutene (Starting material)**

|   |             |             |             |
|---|-------------|-------------|-------------|
| C | -0.51527600 | 0.08716800  | -0.00000400 |
| C | 0.39891400  | 1.07049100  | -0.00011100 |
| C | 1.56030100  | 0.08500500  | -0.00002900 |
| H | 0.34763600  | 2.15351400  | -0.00021400 |
| H | 2.19870100  | 0.09024800  | 0.89244900  |
| H | 2.19867900  | 0.09007300  | -0.89252500 |
| C | 0.47428800  | -1.05702300 | 0.00009800  |
| H | 0.47528600  | -1.69368200 | -0.89446500 |
| H | 0.47530700  | -1.69350300 | 0.89478900  |
| O | -1.87479700 | 0.09449200  | 0.00002000  |
| H | -2.20658700 | -0.81642900 | 0.00007900  |

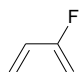**Butadiene (Product)**

|   |             |             |             |
|---|-------------|-------------|-------------|
| C | -0.47990600 | 0.03955600  | 0.03519500  |
| C | 0.86449700  | -0.52760200 | 0.16534700  |
| C | 2.00694800  | 0.11051000  | -0.12355900 |

|   |             |             |             |
|---|-------------|-------------|-------------|
| H | 0.88937100  | -1.55741700 | 0.51764200  |
| H | 2.96831100  | -0.37189000 | 0.02542700  |
| H | 2.02149500  | 1.12284300  | -0.51973800 |
| C | -0.88375500 | 1.31085300  | 0.07074700  |
| H | -0.16896200 | 2.10822100  | 0.23659400  |
| H | -1.92960500 | 1.56751200  | -0.05488900 |
| F | -1.42525800 | -0.94101800 | -0.12126800 |

**Transition state**

|   |             |             |             |
|---|-------------|-------------|-------------|
| C | 0.46823900  | -0.04546000 | -0.07876400 |
| C | -0.56388500 | -0.94260100 | -0.14404300 |
| C | -1.67984500 | -0.12285900 | 0.21013200  |
| H | -0.57873600 | -1.96140200 | -0.52024400 |
| H | -2.64294000 | -0.20037100 | -0.30544500 |
| H | -1.74062200 | 0.31068300  | 1.20094300  |
| C | -0.04575300 | 1.27335300  | -0.13919300 |
| H | -0.58968500 | 1.58343900  | -1.02360600 |
| H | 0.40821000  | 2.08927600  | 0.43036100  |
| F | 1.78569300  | -0.31069100 | 0.12546700  |

**Cyclobutene (Starting material)**

|   |             |             |             |
|---|-------------|-------------|-------------|
| C | -0.51363200 | 0.05222100  | -0.00000100 |
| C | 0.34062300  | 1.07804400  | -0.00010700 |
| C | 1.53361400  | 0.12423400  | -0.00003200 |
| H | 0.24761600  | 2.15759600  | -0.00021100 |
| H | 2.16675600  | 0.15962500  | 0.89392600  |
| H | 2.16672800  | 0.15944700  | -0.89401700 |
| C | 0.49197900  | -1.06168300 | 0.00010300  |
| H | 0.50941200  | -1.69562300 | -0.89398700 |
| H | 0.50943300  | -1.69544000 | 0.89432300  |
| F | -1.85727100 | -0.02694400 | 0.00002100  |

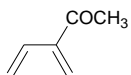

### Butadiene (Product)

|   |             |             |             |
|---|-------------|-------------|-------------|
| C | -0.27553800 | 0.33371700  | -0.10308400 |
| C | -1.46160500 | -0.54539700 | -0.16747100 |
| C | -2.69108200 | -0.21733200 | 0.25279100  |
| H | -1.27604500 | -1.54281600 | -0.55780800 |
| H | -3.51804500 | -0.91611100 | 0.16182700  |
| H | -2.91386200 | 0.74250700  | 0.71454900  |
| C | -0.34416700 | 1.67775700  | -0.18071000 |
| H | -1.29247600 | 2.18680800  | -0.32980000 |
| H | 0.53478000  | 2.30999800  | -0.11294000 |
| C | 1.05499500  | -0.36710900 | 0.00418000  |
| O | 1.10960100  | -1.58800800 | -0.05735400 |
| C | 2.32584700  | 0.44816100  | 0.18039600  |
| H | 2.50468600  | 1.09287900  | -0.68851200 |
| H | 2.26790000  | 1.09300600  | 1.06507500  |
| H | 3.16555300  | -0.24097800 | 0.28982300  |

### Transition state

|   |             |             |             |
|---|-------------|-------------|-------------|
| C | -0.27961700 | 0.11017900  | -0.18661200 |
| C | -1.16546700 | -0.96388800 | -0.17072000 |
| C | -2.37883900 | -0.42021500 | 0.32516000  |
| H | -1.03643400 | -1.96923400 | -0.56959700 |
| H | -3.36349900 | -0.76240700 | -0.00710900 |
| H | -2.38162200 | 0.05209600  | 1.30198700  |
| C | -1.13840400 | 1.25648100  | -0.20914600 |
| H | -1.80442400 | 1.39229300  | -1.05303700 |
| H | -0.90231400 | 2.17015900  | 0.34168200  |
| C | 1.18602500  | 0.15356600  | -0.00329300 |
| C | 1.93768600  | -1.16614000 | 0.02727000  |
| H | 1.59380500  | -1.84398700 | -0.76343000 |
| H | 3.00739100  | -0.97688100 | -0.08752700 |
| H | 1.76835600  | -1.67151700 | 0.98686000  |
| O | 1.76880400  | 1.22369800  | 0.14427800  |

**Cyclobutene (Starting material)**

|   |             |             |             |
|---|-------------|-------------|-------------|
| C | 0.25456700  | -0.00037500 | 0.00014400  |
| C | 1.05907800  | -1.08757200 | 0.00014300  |
| C | 2.33925800  | -0.27737500 | -0.00004300 |
| H | 0.87174900  | -2.15927600 | 0.00023300  |
| H | 2.96980200  | -0.39245700 | -0.89044800 |
| H | 2.97000000  | -0.39236400 | 0.89023400  |
| C | 1.40830100  | 0.99018400  | 0.00000100  |
| H | 1.48343800  | 1.62411200  | 0.89003000  |
| H | 1.48326700  | 1.62404200  | -0.89009300 |
| C | -1.20553900 | 0.20911500  | 0.00028700  |
| C | -2.10278200 | -1.01629400 | 0.00004300  |
| H | -3.14855400 | -0.70153100 | -0.00033000 |
| H | -1.90878300 | -1.63745500 | -0.88318000 |
| H | -1.90938300 | -1.63734800 | 0.88347300  |
| O | -1.66610500 | 1.34577300  | -0.00042100 |

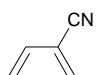**Butadiene (Product)**

|   |             |             |             |
|---|-------------|-------------|-------------|
| C | 0.09232300  | 0.30734200  | -0.08293600 |
| C | -0.99720100 | -0.68357600 | -0.24499200 |
| C | -2.24611700 | -0.52339700 | 0.21082200  |
| H | -0.72432300 | -1.60495200 | -0.75668100 |
| H | -3.00452500 | -1.28125400 | 0.03771400  |
| H | -2.54774000 | 0.35295700  | 0.77948200  |
| C | -0.07476900 | 1.64491000  | -0.06667100 |
| H | -1.05749100 | 2.08276900  | -0.21140700 |
| H | 0.76191300  | 2.32051400  | 0.07749200  |
| C | 1.42297200  | -0.23548900 | 0.04108300  |
| N | 2.48413200  | -0.70411000 | 0.13279500  |

**Transition state**

|   |             |             |             |
|---|-------------|-------------|-------------|
| C | 0.11196800  | 0.04488400  | -0.13787800 |
| C | -0.86190800 | -0.94339100 | -0.18599600 |

|   |             |             |             |
|---|-------------|-------------|-------------|
| C | -2.03479800 | -0.29859300 | 0.28867300  |
| H | -0.79566800 | -1.94350000 | -0.60878200 |
| H | -3.03231000 | -0.53276300 | -0.09361700 |
| H | -2.03107500 | 0.13107900  | 1.28455800  |
| C | -0.62850200 | 1.27282000  | -0.14741700 |
| H | -1.24823300 | 1.49261200  | -1.00804600 |
| C | 1.52438500  | -0.08337100 | 0.01707900  |
| H | -0.31424600 | 2.14856800  | 0.42648300  |
| N | 2.67923800  | -0.17858500 | 0.14180500  |

### Cyclobutene (Starting material)

|   |             |             |             |
|---|-------------|-------------|-------------|
| C | -0.14574800 | 0.05743400  | -0.00000600 |
| C | 0.76628800  | 1.05237200  | -0.00010600 |
| C | 1.95346100  | 0.11150000  | -0.00004400 |
| H | 0.67921800  | 2.13515000  | -0.00020600 |
| H | 2.59113600  | 0.15748600  | 0.89078600  |
| H | 2.59109400  | 0.15731000  | -0.89091400 |
| C | 0.89926500  | -1.05465200 | 0.00009800  |
| H | 0.90587500  | -1.68884500 | -0.89286400 |
| C | -1.56665500 | 0.02741900  | 0.00001500  |
| H | 0.90590300  | -1.68865700 | 0.89319500  |
| N | -2.73041400 | -0.03384000 | 0.00003700  |

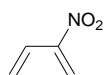

### Butadiene (Product)

|   |             |             |             |
|---|-------------|-------------|-------------|
| C | -0.21488700 | 0.37718100  | -0.10833400 |
| C | -1.34198000 | -0.55679000 | -0.22467100 |
| C | -2.57123400 | -0.29653500 | 0.24010500  |
| H | -1.13208300 | -1.50415000 | -0.71113700 |
| H | -3.38150800 | -1.00457700 | 0.09407200  |
| H | -2.80707800 | 0.61276200  | 0.78803200  |
| C | -0.25364200 | 1.71437700  | -0.13449300 |
| H | -1.19825200 | 2.22623200  | -0.28319700 |
| H | 0.64683000  | 2.30520500  | -0.01850300 |

|   |            |             |            |
|---|------------|-------------|------------|
| N | 1.12988200 | -0.26123600 | 0.02941100 |
| O | 2.11500400 | 0.46255200  | 0.15973100 |
| O | 1.16666800 | -1.49208000 | 0.00142200 |

**Transition state**

|   |             |             |             |
|---|-------------|-------------|-------------|
| C | -0.22398900 | 0.05896000  | -0.15585200 |
| C | -1.17024000 | -0.94338500 | -0.12588300 |
| C | -2.33603100 | -0.25119900 | 0.29859900  |
| H | -1.10193000 | -1.96500100 | -0.48724000 |
| H | -3.33296900 | -0.48309400 | -0.08513300 |
| H | -2.33088900 | 0.24846000  | 1.26142900  |
| C | -0.91861500 | 1.29828900  | -0.22820700 |
| H | -1.54122300 | 1.49069700  | -1.09395200 |
| H | -0.59012900 | 2.18354800  | 0.31805200  |
| N | 1.20747800  | -0.07225500 | 0.01364500  |
| O | 1.85919600  | 0.96797600  | 0.15641700  |
| O | 1.68305900  | -1.21107800 | 0.00100600  |

**Cyclobutene (Starting material)**

|   |             |             |             |
|---|-------------|-------------|-------------|
| C | -0.19792000 | -0.04330900 | -0.00006500 |
| C | -1.05496500 | -1.07479500 | -0.00017100 |
| C | -2.25653200 | -0.14403300 | 0.00016700  |
| H | -0.93670500 | -2.15245200 | -0.00045700 |
| H | -2.88885600 | -0.20524500 | 0.89302800  |
| H | -2.89015100 | -0.20538700 | -0.89172100 |
| C | -1.22970100 | 1.05346800  | -0.00011000 |
| H | -1.24996600 | 1.68537800  | -0.89322100 |
| H | -1.24993700 | 1.68606700  | 0.89251800  |
| N | 1.24345600  | 0.00221200  | 0.00003300  |
| O | 1.85557900  | -1.06929600 | 0.00007600  |
| O | 1.76268800  | 1.12281700  | 0.00001200  |



## 6.3 Disubstituted butadienes

### 6.3.1 1,2-Disubstituted butadienes

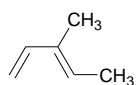

#### Butadiene (Product)

|   |             |             |             |
|---|-------------|-------------|-------------|
| C | 0.05757100  | 0.32661700  | -0.07845400 |
| C | 1.51948000  | 0.16471800  | -0.24813400 |
| C | 2.26930700  | -0.84691300 | 0.21475800  |
| H | 2.02190700  | 0.97677800  | -0.77889300 |
| H | 3.33859600  | -0.88896600 | 0.02425800  |
| H | 1.84343900  | -1.65703900 | 0.80252200  |
| C | -0.76745700 | -0.73840300 | -0.14928300 |
| H | -0.30992900 | -1.70246700 | -0.37344200 |
| C | -2.25878500 | -0.77904600 | 0.02990400  |
| H | -2.74886100 | -1.18882300 | -0.86447200 |
| H | -2.52816700 | -1.44391600 | 0.86318500  |
| H | -2.69923000 | 0.20052100  | 0.23481000  |
| C | -0.39263800 | 1.75429100  | 0.14530200  |
| H | -1.47950400 | 1.86385000  | 0.16417200  |
| H | 0.00271300  | 2.14548600  | 1.09285700  |
| H | -0.00583200 | 2.40699800  | -0.64954800 |

#### Transition state

|   |             |             |             |
|---|-------------|-------------|-------------|
| C | 0.17058000  | 0.61131700  | -0.14307700 |
| C | 1.51773600  | 0.32200900  | -0.05398000 |
| C | 1.58696700  | -1.07379100 | 0.23593600  |
| H | 2.36560100  | 0.97850800  | -0.25374700 |
| H | 2.38295000  | -1.71741200 | -0.15586200 |
| H | 1.14032900  | -1.44748500 | 1.15100100  |
| C | -0.43949000 | -0.66611500 | -0.39866300 |
| H | -0.13849200 | -1.17150300 | -1.31087800 |
| C | -1.79344100 | -1.07582600 | 0.12779400  |
| H | -2.59847800 | -0.61742400 | -0.47002800 |
| H | -1.93052500 | -2.16134000 | 0.06408400  |

|   |             |             |             |
|---|-------------|-------------|-------------|
| H | -1.94690300 | -0.77104100 | 1.17000500  |
| C | -0.55145800 | 1.90719900  | 0.10758200  |
| H | -1.32346900 | 2.10891500  | -0.64606700 |
| H | -1.05045200 | 1.90407700  | 1.08793600  |
| H | 0.15407400  | 2.74594600  | 0.10999300  |

### Cyclobutene (Starting material)

|   |             |             |             |
|---|-------------|-------------|-------------|
| C | 0.74999500  | 0.13772100  | 0.04212000  |
| C | 0.39479700  | 1.39262700  | -0.28777400 |
| C | -1.06759700 | 1.21271400  | 0.07870000  |
| H | 0.95183700  | 2.24503200  | -0.67275300 |
| H | -1.78148200 | 1.27267000  | -0.75372300 |
| H | -1.44235100 | 1.83248000  | 0.90427400  |
| C | -0.66338000 | -0.25645700 | 0.47639400  |
| H | -0.74693000 | -0.43186200 | 1.55970400  |
| C | -1.34877400 | -1.39142600 | -0.28332800 |
| H | -0.87246000 | -2.35785900 | -0.07261200 |
| H | -2.40589700 | -1.47365600 | 0.00075800  |
| H | -1.30100200 | -1.22249500 | -1.36697100 |
| C | 2.02213000  | -0.64359500 | 0.02744800  |
| H | 1.93344800  | -1.53965200 | -0.60272400 |
| H | 2.85599600  | -0.04282900 | -0.35375900 |
| H | 2.28581700  | -0.99132800 | 1.03644900  |

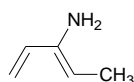

### Butadiene (Product)

|   |             |             |             |
|---|-------------|-------------|-------------|
| C | 0.05711100  | 0.31129500  | -0.07281500 |
| C | 1.52221700  | 0.22047600  | -0.23585000 |
| C | 2.29884800  | -0.77770900 | 0.20798900  |
| H | 1.99434200  | 1.05741800  | -0.75646000 |
| H | 3.36810800  | -0.78666700 | 0.01411300  |
| H | 1.89141400  | -1.61050800 | 0.77548400  |
| C | -0.76135200 | -0.76180500 | -0.16646100 |
| H | -0.31616000 | -1.71562900 | -0.43052200 |
| C | -2.25096600 | -0.69950800 | 0.04095400  |

|   |             |             |             |
|---|-------------|-------------|-------------|
| H | -2.77859400 | -0.23325900 | -0.80820200 |
| H | -2.67419200 | -1.70259400 | 0.15863100  |
| H | -2.51321800 | -0.12171700 | 0.93884800  |
| N | -0.43043700 | 1.59861300  | 0.22034400  |
| H | 0.21040900  | 2.36044300  | 0.03673100  |
| H | -1.36418900 | 1.80572500  | -0.11392900 |

**Transition state**

|   |             |             |             |
|---|-------------|-------------|-------------|
| C | 0.23275000  | 0.60180800  | -0.14120200 |
| C | 1.54949200  | 0.18834600  | -0.05680800 |
| C | 1.45083400  | -1.20897600 | 0.22184000  |
| H | 2.45939800  | 0.75277400  | -0.25855600 |
| H | 2.15797200  | -1.93345600 | -0.20049700 |
| H | 0.98489400  | -1.55040300 | 1.14022400  |
| C | -0.52942300 | -0.59160000 | -0.39919900 |
| H | -0.30761400 | -1.10534900 | -1.32951600 |
| C | -1.91563900 | -0.83163600 | 0.14899300  |
| H | -2.69571700 | -0.41487500 | -0.50926000 |
| H | -2.11753600 | -1.90725800 | 0.22427100  |
| H | -2.04570000 | -0.38251000 | 1.14000000  |
| N | -0.34427300 | 1.83635700  | 0.17081500  |
| H | 0.30962100  | 2.56961300  | 0.41814000  |
| H | -1.06349000 | 2.16931300  | -0.46224900 |

**Cyclobutene (Starting material)**

|   |             |             |             |
|---|-------------|-------------|-------------|
| C | 0.77751800  | 0.05356100  | 0.03784200  |
| C | 0.56484000  | 1.34556600  | -0.29250200 |
| C | -0.90820800 | 1.29926100  | 0.08273700  |
| H | 1.20361500  | 2.14500300  | -0.65769100 |
| H | -1.62520400 | 1.43496900  | -0.73903600 |
| H | -1.22040100 | 1.93273700  | 0.92473500  |
| C | -0.65599600 | -0.20678700 | 0.47058200  |
| H | -0.74908100 | -0.37936600 | 1.55282400  |
| C | -1.45247600 | -1.26254300 | -0.29606500 |
| H | -1.08615700 | -2.27746400 | -0.08894800 |
| H | -2.51200200 | -1.23428300 | -0.01186600 |
| H | -1.38653200 | -1.09348400 | -1.37846700 |

|   |            |             |             |
|---|------------|-------------|-------------|
| N | 1.86794200 | -0.80038100 | 0.11596800  |
| H | 1.65962000 | -1.78359600 | -0.01758300 |
| H | 2.68647400 | -0.51619600 | -0.41130200 |

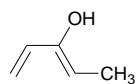

### Butadiene (Product)

|   |             |             |             |
|---|-------------|-------------|-------------|
| C | -0.06744400 | 0.32470800  | 0.05211100  |
| C | -1.53222500 | 0.24858400  | 0.17818700  |
| C | -2.29971900 | -0.79727900 | -0.15756200 |
| H | -1.99665300 | 1.15399700  | 0.56707400  |
| H | -3.37455500 | -0.77376800 | -0.00206800 |
| H | -1.88761000 | -1.70090600 | -0.59993800 |
| C | 0.77882700  | -0.72128500 | 0.12775900  |
| H | 0.33859900  | -1.69058300 | 0.34332700  |
| C | 2.27483000  | -0.67545600 | -0.02441100 |
| H | 2.79100900  | -0.76522200 | 0.94279300  |
| H | 2.62591400  | -1.50716600 | -0.64830800 |
| H | 2.63755500  | 0.24402600  | -0.50358900 |
| O | 0.33021300  | 1.63444300  | -0.12883200 |
| H | 1.29842100  | 1.68844600  | -0.12513900 |

### Transition state

|   |             |             |             |
|---|-------------|-------------|-------------|
| C | 0.25432600  | 0.58316400  | -0.14068000 |
| C | 1.55567600  | 0.13904500  | -0.04486100 |
| C | 1.39388900  | -1.25386900 | 0.23110500  |
| H | 2.48316400  | 0.66373100  | -0.26834200 |
| H | 2.04995200  | -2.01085300 | -0.21408900 |
| H | 0.91911700  | -1.57655700 | 1.15092900  |
| C | -0.57148500 | -0.55515800 | -0.39335900 |
| H | -0.36378800 | -1.10130100 | -1.30794000 |
| C | -1.97258900 | -0.70227400 | 0.14276200  |
| H | -2.70201600 | -0.21195300 | -0.52034400 |
| H | -2.25541300 | -1.76014000 | 0.20135600  |
| H | -2.08214300 | -0.25609000 | 1.13727700  |
| O | -0.29410700 | 1.82498800  | 0.06524800  |

|   |            |            |            |
|---|------------|------------|------------|
| H | 0.34508500 | 2.38781500 | 0.52937000 |
|---|------------|------------|------------|

**Cyclobutene (Starting material)**

|   |             |             |             |
|---|-------------|-------------|-------------|
| C | 0.78817100  | -0.02075300 | 0.03641600  |
| C | 0.72127200  | 1.28008100  | -0.28648000 |
| C | -0.75196300 | 1.36870300  | 0.08949400  |
| H | 1.43375500  | 2.00569300  | -0.66305800 |
| H | -1.44741100 | 1.56798900  | -0.73651200 |
| H | -1.00102600 | 2.03113500  | 0.92896000  |
| C | -0.65838400 | -0.15780400 | 0.47528800  |
| H | -0.77177200 | -0.31938600 | 1.55783400  |
| C | -1.55481000 | -1.12638000 | -0.29662000 |
| H | -1.29033200 | -2.17384800 | -0.09676300 |
| H | -2.60559900 | -0.99614700 | -0.00976500 |
| H | -1.47165300 | -0.95935500 | -1.37752700 |
| O | 1.80104400  | -0.92861600 | -0.00216100 |
| H | 1.47996500  | -1.79023600 | 0.30552500  |

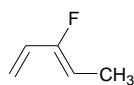**Butadiene (Product)**

|   |             |             |             |
|---|-------------|-------------|-------------|
| C | -0.06656900 | 0.28347200  | 0.04932000  |
| C | -1.52586800 | 0.25956900  | 0.16202100  |
| C | -2.32040200 | -0.77768500 | -0.13908400 |
| H | -1.96464300 | 1.19099500  | 0.51716300  |
| H | -3.39467500 | -0.71770500 | 0.00790800  |
| H | -1.93125400 | -1.70987200 | -0.54107200 |
| C | 0.81162200  | -0.72364100 | 0.11688100  |
| H | 0.39618200  | -1.71201700 | 0.29892800  |
| C | 2.30003500  | -0.60532300 | -0.02446000 |
| H | 2.80900000  | -0.97868200 | 0.87436700  |
| H | 2.66030200  | -1.21134000 | -0.86716600 |
| H | 2.61037400  | 0.42928200  | -0.19034000 |
| F | 0.40242300  | 1.56566600  | -0.12087200 |

**Transition state**

|   |             |             |             |
|---|-------------|-------------|-------------|
| C | 0.25849700  | 0.58098000  | -0.12707000 |
| C | 1.56131500  | 0.18279200  | -0.01167800 |
| C | 1.41310500  | -1.22221500 | 0.21107700  |
| H | 2.47633500  | 0.73812700  | -0.19852900 |
| H | 2.07260900  | -1.95722500 | -0.26258100 |
| H | 0.93252100  | -1.57708300 | 1.11535100  |
| C | -0.56885600 | -0.54116000 | -0.40499500 |
| H | -0.35872200 | -1.07746100 | -1.32510500 |
| C | -1.96223300 | -0.70860200 | 0.14272800  |
| H | -2.70119100 | -0.23111000 | -0.51857500 |
| H | -2.22880600 | -1.77031000 | 0.20266000  |
| H | -2.07170000 | -0.26506700 | 1.13801500  |
| F | -0.25911200 | 1.82104000  | 0.10982100  |

**Cyclobutene (Starting material)**

|   |             |             |             |
|---|-------------|-------------|-------------|
| C | 0.76587600  | -0.10085300 | 0.04576700  |
| C | 0.85656800  | 1.18629100  | -0.29344900 |
| C | -0.60677600 | 1.41846900  | 0.07883900  |
| H | 1.64162800  | 1.83038800  | -0.67174500 |
| H | -1.26807600 | 1.67961800  | -0.75589900 |
| H | -0.78106200 | 2.11137900  | 0.91072300  |
| C | -0.67571200 | -0.11059200 | 0.47945900  |
| H | -0.80378800 | -0.25051000 | 1.56153000  |
| C | -1.65456100 | -0.99474500 | -0.29062300 |
| H | -1.47043600 | -2.05602200 | -0.08537900 |
| H | -2.68872900 | -0.77094600 | -0.00207700 |
| H | -1.55818700 | -0.83828400 | -1.37196600 |
| F | 1.64625300  | -1.12189400 | 0.03276100  |

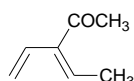**Butadiene (Product)**

|   |            |             |            |
|---|------------|-------------|------------|
| C | 0.32752700 | 0.08573700  | 0.10877200 |
| C | 1.71221100 | -0.42217700 | 0.27461800 |

|   |             |             |             |
|---|-------------|-------------|-------------|
| C | 2.82013300  | 0.17007900  | -0.19171700 |
| H | 1.80175500  | -1.37391200 | 0.79286000  |
| H | 3.80247700  | -0.25536000 | -0.00512900 |
| H | 2.78881900  | 1.07959800  | -0.78828500 |
| C | 0.08864300  | 1.42095500  | 0.12972500  |
| H | 0.96044800  | 2.04033600  | 0.34068700  |
| C | -1.16430900 | 2.21940300  | -0.09834900 |
| H | -1.63174700 | 2.49649000  | 0.85867500  |
| H | -0.90599300 | 3.16088400  | -0.59761100 |
| H | -1.91671500 | 1.71481200  | -0.70482400 |
| C | -0.69954800 | -1.00495100 | -0.03542500 |
| C | -2.19157700 | -0.73000500 | 0.05923200  |
| H | -2.44009400 | -0.01405700 | 0.84837500  |
| H | -2.56736500 | -0.32868000 | -0.89051100 |
| H | -2.69711100 | -1.68023800 | 0.24736400  |
| O | -0.31911900 | -2.15926600 | -0.19784200 |

#### Transition state

|   |             |             |             |
|---|-------------|-------------|-------------|
| C | -0.04606000 | -0.30018200 | -0.20803200 |
| C | -0.49519500 | -1.61106400 | -0.09065000 |
| C | -1.86061200 | -1.50061600 | 0.27989900  |
| H | 0.01747800  | -2.53481900 | -0.35831000 |
| H | -2.61997900 | -2.22090800 | -0.03827200 |
| H | -2.11606900 | -0.96496600 | 1.18856000  |
| C | -1.26311600 | 0.45162000  | -0.40903700 |
| H | -1.81878800 | 0.20496900  | -1.30891000 |
| C | -1.56873900 | 1.80139600  | 0.17414200  |
| H | -1.08201900 | 2.57928200  | -0.43220300 |
| H | -2.64750000 | 1.99575600  | 0.16262200  |
| H | -1.19149500 | 1.91267900  | 1.19512700  |
| C | 1.30667700  | 0.25521500  | -0.02851300 |
| C | 2.45889500  | -0.72865400 | 0.10677200  |
| H | 2.37655300  | -1.55348600 | -0.61090900 |
| H | 3.40275900  | -0.19968700 | -0.04442900 |
| H | 2.45818800  | -1.16815900 | 1.11262600  |
| O | 1.50372200  | 1.46788200  | 0.02332600  |

**Cyclobutene (Starting material)**

|   |             |             |             |
|---|-------------|-------------|-------------|
| C | 0.04236200  | -0.30724300 | -0.11125900 |
| C | -0.46076500 | -1.54652500 | 0.08327700  |
| C | -1.89444600 | -1.12729500 | -0.16498900 |
| H | -0.01113600 | -2.50965500 | 0.31608900  |
| H | -2.56445300 | -1.21393600 | 0.70021300  |
| H | -2.38242600 | -1.59125800 | -1.03189000 |
| C | -1.31850500 | 0.32198100  | -0.40266400 |
| H | -1.41929600 | 0.64455000  | -1.44702400 |
| C | -1.80699700 | 1.42358600  | 0.53457500  |
| H | -1.20737900 | 2.33144800  | 0.40933300  |
| H | -2.85564300 | 1.67285000  | 0.32784100  |
| H | -1.73330700 | 1.10984700  | 1.58397000  |
| C | 1.39794700  | 0.27344100  | -0.09127000 |
| C | 2.55495300  | -0.62319100 | 0.31431300  |
| H | 2.55235100  | -1.55823500 | -0.25853500 |
| H | 3.49796900  | -0.09569000 | 0.15370900  |
| H | 2.46966800  | -0.89060400 | 1.37552900  |
| O | 1.57079400  | 1.45152000  | -0.38764100 |

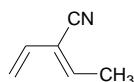**Butadiene (Product)**

|   |             |             |             |
|---|-------------|-------------|-------------|
| C | 0.13990900  | 0.08693900  | -0.10249000 |
| C | 1.58109300  | 0.40514000  | -0.23681900 |
| C | 2.58362300  | -0.35123500 | 0.22915400  |
| H | 1.80915100  | 1.34251200  | -0.74208700 |
| H | 3.61899000  | -0.06584800 | 0.06726800  |
| H | 2.40877700  | -1.26424700 | 0.79346500  |
| C | -0.37143100 | -1.16601500 | -0.12617000 |
| H | 0.33435300  | -1.97939500 | -0.28863500 |
| C | -1.80787400 | -1.54990800 | 0.03395800  |
| H | -2.15528200 | -2.11170700 | -0.84370800 |
| H | -1.92962200 | -2.21696700 | 0.89878000  |
| H | -2.46005300 | -0.68329300 | 0.17317100  |
| C | -0.73815200 | 1.22068600  | 0.03335500  |



|   |             |            |            |
|---|-------------|------------|------------|
| N | -1.42133100 | 2.15790200 | 0.13654600 |
|---|-------------|------------|------------|

**Transition state**

|   |             |             |             |
|---|-------------|-------------|-------------|
| C | 0.18688300  | -0.40880400 | -0.18110500 |
| C | -0.68321400 | -1.48098500 | -0.04958000 |
| C | -1.92830600 | -0.88540100 | 0.28508100  |
| H | -0.50274800 | -2.52908400 | -0.28062600 |
| H | -2.88551300 | -1.29439100 | -0.05026400 |
| H | -1.99634700 | -0.28626300 | 1.18712000  |
| C | -0.67334500 | 0.72489500  | -0.41394000 |
| H | -1.27010300 | 0.67925300  | -1.31882800 |
| C | -0.42985800 | 2.10206300  | 0.13717000  |
| H | 0.34704300  | 2.61035400  | -0.45561500 |
| H | -1.33428800 | 2.71664000  | 0.07554400  |
| H | -0.08672100 | 2.08122600  | 1.17685800  |
| C | 1.60019900  | -0.36009700 | 0.00103700  |
| N | 2.75636100  | -0.30396600 | 0.14197600  |

**Cyclobutene (Starting material)**

|   |             |             |             |
|---|-------------|-------------|-------------|
| C | -0.39196900 | -0.37271300 | 0.04417700  |
| C | 0.28620900  | -1.49117100 | -0.28468200 |
| C | 1.63756300  | -0.91251500 | 0.07715200  |
| H | -0.02701100 | -2.46055100 | -0.66221800 |
| H | 2.33178600  | -0.78521800 | -0.76272100 |
| H | 2.16669600  | -1.41443300 | 0.89674100  |
| C | 0.85973400  | 0.39906600  | 0.47789800  |
| H | 0.88281800  | 0.58144300  | 1.56005600  |
| C | 1.19841100  | 1.67642200  | -0.28373000 |
| H | 0.46957200  | 2.46703100  | -0.06926200 |
| H | 2.19009900  | 2.04612300  | 0.00482300  |
| H | 1.19938600  | 1.50274700  | -1.36680000 |
| C | -1.76522600 | -0.00832300 | 0.01930500  |
| N | -2.88024000 | 0.33118100  | 0.01409400  |

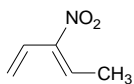

### Butadiene (Product)

|   |             |             |             |
|---|-------------|-------------|-------------|
| C | 0.26099800  | -0.15937900 | -0.12695700 |
| C | 1.70483500  | 0.07607400  | -0.29174200 |
| C | 2.66376000  | -0.72945500 | 0.18309800  |
| H | 1.97954100  | 0.97518400  | -0.83680400 |
| H | 3.71121200  | -0.52398800 | -0.01681300 |
| H | 2.44368200  | -1.60244400 | 0.79311700  |
| C | -0.33490500 | -1.36977400 | -0.10170400 |
| H | 0.35321000  | -2.19692300 | -0.26662500 |
| C | -1.76701700 | -1.75103900 | 0.11856700  |
| H | -2.34330700 | -1.62588800 | -0.80811300 |
| H | -1.82905500 | -2.80301400 | 0.41418700  |
| H | -2.25865900 | -1.12800500 | 0.86975200  |
| N | -0.53730300 | 1.07354000  | 0.01391900  |
| O | -1.76084500 | 1.01150200  | -0.13469900 |
| O | 0.07815400  | 2.11246500  | 0.26798600  |

### Transition state

|   |             |             |             |
|---|-------------|-------------|-------------|
| C | -0.03068800 | -0.34553800 | -0.17985700 |
| C | -0.60411500 | -1.59267600 | -0.05948800 |
| C | -1.95647200 | -1.28956000 | 0.24912900  |
| H | -0.18238600 | -2.56269500 | -0.30710400 |
| H | -2.79253500 | -1.88673800 | -0.12375600 |
| H | -2.17827300 | -0.72299000 | 1.14736900  |
| C | -1.09832500 | 0.58504600  | -0.41554300 |
| H | -1.65905500 | 0.41706300  | -1.33019000 |
| C | -1.23599400 | 1.95702300  | 0.17670600  |
| H | -0.70944600 | 2.68810300  | -0.45309900 |
| H | -2.29128500 | 2.25217400  | 0.20761900  |
| H | -0.81064500 | 2.02698400  | 1.18160500  |
| N | 1.36095900  | -0.01017500 | 0.00116300  |
| O | 2.16189300  | -0.94220800 | 0.12620800  |
| O | 1.66941500  | 1.18890200  | 0.00425700  |

**Cyclobutene (Starting material)**

|   |             |             |             |
|---|-------------|-------------|-------------|
| C | -0.08640600 | -0.34873500 | 0.08122100  |
| C | 0.44347700  | -1.56070300 | -0.13561600 |
| C | 1.84619800  | -1.06191700 | 0.16451800  |
| H | 0.02903500  | -2.52570000 | -0.40538500 |
| H | 2.53834700  | -1.09349600 | -0.68518200 |
| H | 2.32760600  | -1.52154000 | 1.03577600  |
| C | 1.20514400  | 0.36112000  | 0.42446400  |
| H | 1.26194900  | 0.65677200  | 1.47908700  |
| C | 1.66178600  | 1.50536400  | -0.47629300 |
| H | 1.01880400  | 2.38170500  | -0.34498600 |
| H | 2.69076600  | 1.79564700  | -0.23241900 |
| H | 1.62999100  | 1.21395800  | -1.53339600 |
| N | -1.45066900 | 0.11641100  | 0.02747900  |
| O | -2.32365000 | -0.68356000 | -0.31890700 |
| O | -1.64672700 | 1.29693500  | 0.33695600  |

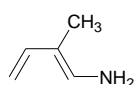**Butadiene (Product)**

|   |             |             |             |
|---|-------------|-------------|-------------|
| C | 0.03464600  | 0.33007700  | -0.07444400 |
| C | 1.49581700  | 0.26661700  | -0.19813700 |
| C | 2.30837900  | -0.72917800 | 0.20164400  |
| H | 1.95850700  | 1.14250500  | -0.65970700 |
| H | 3.37734800  | -0.69295600 | 0.00971600  |
| H | 1.93626100  | -1.60260700 | 0.73291300  |
| C | -0.71848700 | -0.79352200 | -0.14469800 |
| H | -0.25213800 | -1.74655500 | -0.38109400 |
| N | -2.10569100 | -0.84800600 | -0.03201400 |
| H | -2.50501700 | -1.76665700 | 0.10306700  |
| H | -2.55035500 | -0.14520900 | 0.54530000  |
| C | -0.60609400 | 1.68875100  | 0.11352200  |
| H | -1.56876300 | 1.76375700  | -0.40941100 |
| H | -0.78310300 | 1.92537900  | 1.17442800  |
| H | 0.04153400  | 2.48191100  | -0.27843600 |

**Transition state**

|   |             |             |             |
|---|-------------|-------------|-------------|
| C | -0.05896200 | 0.62895000  | -0.12475300 |
| C | 1.30673800  | 0.75995000  | -0.02520800 |
| C | 1.81298100  | -0.55902600 | 0.21733700  |
| H | 1.89743100  | 1.65986100  | -0.20682000 |
| H | 2.77120100  | -0.89504400 | -0.19456400 |
| H | 1.55153300  | -1.05426800 | 1.14802400  |
| C | -0.22591600 | -0.78329900 | -0.39363300 |
| H | 0.13361200  | -1.16654400 | -1.34156400 |
| N | -1.30596300 | -1.50381100 | 0.10740500  |
| H | -1.54257300 | -1.36223400 | 1.08234700  |
| H | -1.38762100 | -2.47244800 | -0.17456300 |
| C | -1.15902900 | 1.63470000  | 0.07976300  |
| H | -1.55776400 | 1.61957700  | 1.10511300  |
| H | -0.77541800 | 2.64795800  | -0.09224300 |
| H | -2.00353400 | 1.46217500  | -0.59860900 |

**Cyclobutene (Starting material)**

|   |             |             |             |
|---|-------------|-------------|-------------|
| C | 0.73041400  | 0.17495300  | 0.04128100  |
| C | 0.29802800  | 1.41362100  | -0.24963500 |
| C | -1.16077300 | 1.11918300  | 0.05053000  |
| H | 0.80618800  | 2.31817800  | -0.57925500 |
| H | -1.82691700 | 1.11125900  | -0.82031600 |
| H | -1.62697600 | 1.69677700  | 0.85999700  |
| C | -0.65772000 | -0.31416100 | 0.44693100  |
| H | -0.74461900 | -0.49568900 | 1.53390000  |
| N | -1.20575100 | -1.40050000 | -0.36842400 |
| H | -0.70103800 | -2.26935900 | -0.19612900 |
| H | -2.17984000 | -1.57450600 | -0.12201900 |
| C | 2.04543000  | -0.52955500 | 0.02055900  |
| H | 2.02560300  | -1.38524500 | -0.66905200 |
| H | 2.85127500  | 0.14049600  | -0.30027600 |
| H | 2.30430400  | -0.92265600 | 1.01412300  |

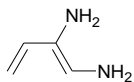

### Butadiene (Product)

|   |             |             |             |
|---|-------------|-------------|-------------|
| C | 0.03492500  | 0.31180400  | -0.06903700 |
| C | 1.49100500  | 0.26730100  | -0.21494100 |
| C | 2.30672700  | -0.71810100 | 0.20279000  |
| H | 1.93823200  | 1.13604000  | -0.70580200 |
| H | 3.37319900  | -0.69058300 | -0.00317300 |
| H | 1.93275100  | -1.57673900 | 0.75550900  |
| C | -0.75414600 | -0.78562200 | -0.16058500 |
| H | -0.33801100 | -1.74189200 | -0.45780000 |
| N | -2.14418900 | -0.73106600 | -0.01754900 |
| H | -2.58931500 | -1.61960900 | 0.17715000  |
| H | -2.45493900 | -0.00274500 | 0.62157700  |
| N | -0.59283600 | 1.56948300  | 0.19372700  |
| H | 0.06839300  | 2.31863700  | 0.36753600  |
| H | -1.24220000 | 1.85568600  | -0.53760800 |

### Transition state

|   |             |             |             |
|---|-------------|-------------|-------------|
| C | 0.11763100  | 0.62213900  | -0.14770500 |
| C | 1.47458400  | 0.40764100  | -0.05715400 |
| C | 1.59511000  | -0.99313400 | 0.22902500  |
| H | 2.27975000  | 1.11593800  | -0.25475100 |
| H | 2.40974900  | -1.59521000 | -0.19111100 |
| H | 1.22582800  | -1.37816900 | 1.17597900  |
| C | -0.44764700 | -0.68527400 | -0.38370500 |
| H | -0.21327400 | -1.17488300 | -1.32087000 |
| N | -1.71132800 | -1.01858900 | 0.11094100  |
| H | -1.90319000 | -0.73023800 | 1.06461300  |
| H | -2.03933100 | -1.95609600 | -0.08390000 |
| N | -0.66477400 | 1.74695200  | 0.16153700  |
| H | -0.12878900 | 2.58962400  | 0.33661700  |
| H | -1.43609700 | 1.92226600  | -0.47668300 |

**Cyclobutene (Starting material)**

|   |             |             |             |
|---|-------------|-------------|-------------|
| C | 0.77097900  | 0.08568100  | 0.03517400  |
| C | 0.49235700  | 1.37734500  | -0.23452800 |
| C | -0.99404300 | 1.22029000  | 0.04690500  |
| H | 1.09289400  | 2.23327800  | -0.52963900 |
| H | -1.65053200 | 1.29274900  | -0.83007900 |
| H | -1.41958300 | 1.81981100  | 0.86374200  |
| C | -0.65250300 | -0.25991400 | 0.43745600  |
| H | -0.74931300 | -0.42685100 | 1.52394500  |
| N | -1.32375700 | -1.28861900 | -0.36483000 |
| H | -1.13394900 | -2.21954300 | 0.00461200  |
| H | -2.33418500 | -1.16309600 | -0.32050200 |
| N | 1.90016200  | -0.71910200 | 0.09780700  |
| H | 1.74202600  | -1.68208900 | -0.18186700 |
| H | 2.71706600  | -0.34062700 | -0.37109300 |

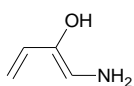**Butadiene (Product)**

|   |             |             |             |
|---|-------------|-------------|-------------|
| C | 0.04932500  | 0.30455500  | -0.05796600 |
| C | 1.51076900  | 0.30421600  | -0.19009400 |
| C | 2.32557000  | -0.69644900 | 0.17229500  |
| H | 1.92689600  | 1.21909400  | -0.61009600 |
| H | 3.39768400  | -0.63229300 | 0.00919300  |
| H | 1.95380700  | -1.60080100 | 0.64747200  |
| C | -0.75822200 | -0.77502100 | -0.14545700 |
| H | -0.35838700 | -1.76016100 | -0.37296300 |
| N | -2.17018200 | -0.56425200 | 0.02916500  |
| H | -2.72176000 | -1.01466300 | -0.69783300 |
| H | -2.50980800 | -0.90658000 | 0.92751800  |
| O | -0.47646700 | 1.55011900  | 0.13617500  |
| H | -1.45007600 | 1.42040700  | 0.13049100  |

**Transition state**

|   |             |            |            |
|---|-------------|------------|------------|
| C | -0.17531600 | 0.60539800 | 0.15428000 |
|---|-------------|------------|------------|

|   |             |             |             |
|---|-------------|-------------|-------------|
| C | -1.50253300 | 0.28341000  | 0.03444400  |
| C | -1.46075800 | -1.12834900 | -0.23271800 |
| H | -2.37424500 | 0.90531000  | 0.23549200  |
| H | -2.18806100 | -1.81520300 | 0.21490600  |
| H | -1.04830700 | -1.48360200 | -1.17206300 |
| C | 0.52740600  | -0.62716200 | 0.38658600  |
| H | 0.33532000  | -1.16371700 | 1.30751700  |
| N | 1.75267300  | -0.90845000 | -0.19753400 |
| H | 2.12538800  | -0.21501700 | -0.83392700 |
| H | 2.45876200  | -1.37162200 | 0.36004500  |
| O | 0.51726700  | 1.78621500  | -0.03433000 |
| H | -0.04849400 | 2.41350000  | -0.51014000 |

### Cyclobutene (Starting material)

|   |             |             |             |
|---|-------------|-------------|-------------|
| C | 0.77138300  | 0.04515900  | 0.03759000  |
| C | 0.60268700  | 1.34729100  | -0.24745500 |
| C | -0.89342000 | 1.30116500  | 0.05143800  |
| H | 1.27058500  | 2.14910500  | -0.54201300 |
| H | -1.55652500 | 1.42591400  | -0.81477500 |
| H | -1.25594300 | 1.93922900  | 0.86968700  |
| C | -0.66101500 | -0.21823200 | 0.44013500  |
| H | -0.78772000 | -0.39062200 | 1.51739000  |
| N | -1.30362700 | -1.32086300 | -0.26080500 |
| H | -2.25763100 | -1.47098000 | 0.06099600  |
| H | -1.33635000 | -1.14983700 | -1.26511400 |
| O | 1.82944300  | -0.80046200 | 0.02054300  |
| H | 1.49561900  | -1.70536100 | 0.14487200  |

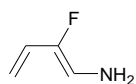

### Butadiene (Product)

|   |             |             |             |
|---|-------------|-------------|-------------|
| C | -0.04671000 | 0.28197400  | 0.05331100  |
| C | -1.49370700 | 0.29550700  | 0.15213400  |
| C | -2.32613200 | -0.72024100 | -0.13815100 |
| H | -1.90682900 | 1.23963800  | 0.50664000  |
| H | -3.39462900 | -0.62911200 | 0.03116700  |

|   |             |             |             |
|---|-------------|-------------|-------------|
| H | -1.97271700 | -1.66374300 | -0.54703500 |
| C | 0.81248300  | -0.75208700 | 0.11218000  |
| H | 0.41872000  | -1.74845600 | 0.28283300  |
| N | 2.18029100  | -0.66470500 | -0.10717900 |
| H | 2.55938800  | 0.27546600  | -0.09457300 |
| H | 2.75255600  | -1.32197700 | 0.40801600  |
| F | 0.51176400  | 1.54113400  | -0.10151500 |

**Transition state**

|   |             |             |             |
|---|-------------|-------------|-------------|
| C | -0.19844200 | 0.60247600  | 0.13694700  |
| C | -1.51186900 | 0.27672100  | -0.00528100 |
| C | -1.43448800 | -1.14508500 | -0.20774100 |
| H | -2.39016200 | 0.89724500  | 0.15530500  |
| H | -2.14354000 | -1.82830400 | 0.27114500  |
| H | -1.00805900 | -1.52616600 | -1.12978600 |
| C | 0.54890300  | -0.59178400 | 0.40112400  |
| H | 0.37857800  | -1.11221600 | 1.33610000  |
| N | 1.76698800  | -0.85892300 | -0.18992500 |
| H | 2.10788800  | -0.22343800 | -0.89919400 |
| H | 2.48692800  | -1.32868500 | 0.34194900  |
| F | 0.41942500  | 1.80889500  | -0.07737100 |

**Cyclobutene (Starting material)**

|   |             |             |             |
|---|-------------|-------------|-------------|
| C | 0.75580100  | -0.03706700 | 0.04224900  |
| C | 0.73365000  | 1.25911500  | -0.26557000 |
| C | -0.75781500 | 1.34456000  | 0.05343400  |
| H | 1.46812600  | 1.98377200  | -0.59711800 |
| H | -1.40892300 | 1.51316800  | -0.81022300 |
| H | -1.03433600 | 2.01755900  | 0.87411000  |
| C | -0.68291800 | -0.18179600 | 0.45148200  |
| H | -0.81419500 | -0.33243700 | 1.53651600  |
| N | -1.48391200 | -1.07839200 | -0.37668600 |
| H | -1.13491100 | -2.03340200 | -0.31287100 |
| H | -2.45221800 | -1.09182800 | -0.06022900 |
| F | 1.71905900  | -0.97966300 | 0.03522700  |



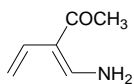

### Butadiene (Product)

|   |             |             |             |
|---|-------------|-------------|-------------|
| C | -0.31608100 | 0.03045000  | -0.08127700 |
| C | -1.65869300 | -0.57841600 | -0.19012200 |
| C | -2.81952500 | -0.04798300 | 0.22621800  |
| H | -1.66647300 | -1.57046600 | -0.63572100 |
| H | -3.75958600 | -0.56752000 | 0.06249100  |
| H | -2.87971000 | 0.90216900  | 0.75466900  |
| C | -0.21606300 | 1.39844700  | -0.13352000 |
| H | -1.13693100 | 1.94485400  | -0.32319000 |
| N | 0.85747000  | 2.22952900  | -0.01584400 |
| H | 0.71235600  | 3.22681700  | -0.04283400 |
| H | 1.76127800  | 1.91551800  | 0.30035400  |
| C | 0.80909000  | -0.92547200 | 0.01167100  |
| C | 2.25230000  | -0.43755000 | 0.09136700  |
| H | 2.50791500  | 0.21626600  | -0.75229800 |
| H | 2.43556400  | 0.10729800  | 1.02882100  |
| H | 2.90960000  | -1.30961000 | 0.07422900  |
| O | 0.60094100  | -2.13861100 | 0.01229600  |

### Transition state

|   |             |             |             |
|---|-------------|-------------|-------------|
| C | 0.04965900  | -0.30692400 | 0.18650000  |
| C | 0.57526300  | -1.57121700 | -0.00256900 |
| C | 1.95811300  | -1.31051800 | -0.28440200 |
| H | 0.10280800  | -2.53918700 | 0.16467900  |
| H | 2.75053000  | -1.98553300 | 0.05620100  |
| H | 2.19862800  | -0.80800200 | -1.21728800 |
| C | 1.26636500  | 0.47262100  | 0.42526100  |
| H | 1.75437200  | 0.32616800  | 1.38348800  |
| N | 1.48842200  | 1.70458100  | -0.15202000 |
| H | 0.70515300  | 2.09325100  | -0.66588000 |
| H | 2.01143200  | 2.38945100  | 0.37850600  |
| C | -1.30914600 | 0.21440100  | 0.01922300  |
| C | -2.45919500 | -0.78010900 | 0.01448400  |
| H | -2.58326700 | -1.18970400 | -0.99655000 |

|   |             |             |             |
|---|-------------|-------------|-------------|
| H | -2.28598900 | -1.62005400 | 0.69594500  |
| H | -3.38165900 | -0.26102300 | 0.28718900  |
| O | -1.52216500 | 1.41913000  | -0.14664100 |

### Cyclobutene (Starting material)

|   |             |             |             |
|---|-------------|-------------|-------------|
| C | -0.02474800 | -0.32242700 | 0.11229600  |
| C | 0.51863200  | -1.54214700 | -0.08767900 |
| C | 1.94389300  | -1.06633600 | 0.10230500  |
| H | 0.09767400  | -2.52306600 | -0.29943800 |
| H | 2.55660700  | -1.08362600 | -0.80627200 |
| H | 2.50275200  | -1.52264400 | 0.92950000  |
| C | 1.31354700  | 0.34886500  | 0.38669000  |
| H | 1.42683000  | 0.64700900  | 1.44229200  |
| N | 1.67577000  | 1.39102500  | -0.56795700 |
| H | 0.99610800  | 2.14892700  | -0.51494600 |
| H | 2.58758800  | 1.78629300  | -0.34140100 |
| C | -1.38179000 | 0.24700700  | 0.08356300  |
| C | -2.54408300 | -0.67071500 | -0.24463200 |
| H | -2.54157800 | -1.55684600 | 0.40158800  |
| H | -3.48426400 | -0.12815900 | -0.12247900 |
| H | -2.46352100 | -1.02255800 | -1.28119500 |
| O | -1.54516200 | 1.44400200  | 0.30659900  |

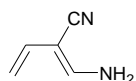

### Butadiene (Product)

|   |             |             |             |
|---|-------------|-------------|-------------|
| C | -0.12947200 | -0.13428000 | -0.08481600 |
| C | -1.53108700 | -0.57447500 | -0.18627700 |
| C | -2.61310000 | 0.12268600  | 0.19558900  |
| H | -1.67152500 | -1.56558400 | -0.61578500 |
| H | -3.61248100 | -0.26847300 | 0.03046100  |
| H | -2.54342900 | 1.08992300  | 0.68840300  |
| C | 0.25406800  | 1.18018100  | -0.11459800 |
| H | -0.50128800 | 1.94354500  | -0.27818900 |
| N | 1.51581800  | 1.65316400  | 0.07129100  |
| H | 2.28998300  | 1.00215600  | 0.13650100  |

|   |            |             |             |
|---|------------|-------------|-------------|
| H | 1.74569300 | 2.59077000  | -0.22277300 |
| C | 0.89637200 | -1.12133000 | 0.02394200  |
| N | 1.77451900 | -1.88588200 | 0.10847300  |

**Transition state**

|   |             |             |             |
|---|-------------|-------------|-------------|
| C | -0.22834500 | -0.38050400 | 0.14691200  |
| C | 0.60818100  | -1.46837800 | -0.00160400 |
| C | 1.89685000  | -0.89440300 | -0.23612800 |
| H | 0.36771600  | -2.51566300 | 0.17576900  |
| H | 2.80967300  | -1.36131400 | 0.14477500  |
| H | 2.04961800  | -0.34145000 | -1.15864500 |
| C | 0.70569000  | 0.70728300  | 0.41544700  |
| H | 1.19155400  | 0.71302200  | 1.38417300  |
| N | 0.54204900  | 1.95443100  | -0.13282100 |
| H | 0.17493400  | 2.03994900  | -1.07149400 |
| H | 1.13772900  | 2.71423300  | 0.16537100  |
| C | -1.63991500 | -0.26356100 | 0.00754000  |
| N | -2.79719000 | -0.16177400 | -0.10045700 |

**Cyclobutene (Starting material)**

|   |             |             |             |
|---|-------------|-------------|-------------|
| C | -0.37379000 | -0.37381400 | 0.03832800  |
| C | 0.34024500  | -1.47710000 | -0.25944800 |
| C | 1.67609800  | -0.84017200 | 0.05834400  |
| H | 0.05589500  | -2.47162200 | -0.59191600 |
| H | 2.32456400  | -0.67559500 | -0.80913400 |
| H | 2.25319700  | -1.30519800 | 0.86703700  |
| C | 0.85209900  | 0.44113400  | 0.45345400  |
| H | 0.87550800  | 0.63319600  | 1.53889800  |
| N | 1.11692100  | 1.61192700  | -0.37179400 |
| H | 0.37445700  | 2.30286800  | -0.27043400 |
| H | 1.98583600  | 2.06227300  | -0.08734600 |
| C | -1.75447400 | -0.04330100 | 0.01680300  |
| N | -2.87556700 | 0.27572800  | 0.01579600  |

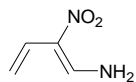

### Butadiene (Product)

|   |             |             |             |
|---|-------------|-------------|-------------|
| C | -0.26586500 | 0.08458700  | -0.08190200 |
| C | -1.67368900 | -0.30865600 | -0.19584500 |
| C | -2.72299200 | 0.42132600  | 0.21318300  |
| H | -1.84485400 | -1.27869200 | -0.65398100 |
| H | -3.73777300 | 0.07729400  | 0.03813700  |
| H | -2.61600100 | 1.36696400  | 0.74083200  |
| C | 0.14828900  | 1.39853600  | -0.12198100 |
| H | -0.63253800 | 2.13721800  | -0.27781100 |
| N | 1.38549300  | 1.89840200  | 0.00512200  |
| H | 2.15929400  | 1.25013700  | 0.11823900  |
| H | 1.55443200  | 2.88524200  | -0.12012100 |
| N | 0.69417300  | -0.96998500 | 0.02362000  |
| O | 1.90996000  | -0.67316300 | 0.12716600  |
| O | 0.29570500  | -2.14081700 | 0.00693100  |

### Transition state

|   |             |             |             |
|---|-------------|-------------|-------------|
| C | 0.02263400  | -0.34350600 | 0.14560700  |
| C | 0.63955800  | -1.55439200 | -0.03062600 |
| C | 1.99795400  | -1.14518200 | -0.24845500 |
| H | 0.23966500  | -2.55151800 | 0.13213800  |
| H | 2.83615800  | -1.72342200 | 0.15126900  |
| H | 2.23292500  | -0.62202200 | -1.17060600 |
| C | 1.11525600  | 0.57980000  | 0.42573600  |
| H | 1.58271700  | 0.48667800  | 1.40054900  |
| N | 1.24251800  | 1.81704000  | -0.15596400 |
| H | 0.48496600  | 2.12406100  | -0.75404800 |
| H | 1.67869700  | 2.55628100  | 0.37881400  |
| N | -1.36765500 | -0.01730900 | 0.00403600  |
| O | -1.66988200 | 1.18189700  | -0.12642400 |
| O | -2.18406600 | -0.94296000 | 0.02290100  |

**Cyclobutene (Starting material)**

|   |             |             |             |
|---|-------------|-------------|-------------|
| C | -0.06585400 | -0.35887800 | 0.08119700  |
| C | 0.50996900  | -1.54752800 | -0.13990300 |
| C | 1.89893000  | -0.98604500 | 0.11001500  |
| H | 0.13009100  | -2.53213700 | -0.38982800 |
| H | 2.53693100  | -0.94913100 | -0.77913000 |
| H | 2.44806400  | -1.43192900 | 0.94758500  |
| C | 1.19766500  | 0.39810900  | 0.40901700  |
| H | 1.26509900  | 0.67497600  | 1.47336300  |
| N | 1.52916900  | 1.46865100  | -0.51943500 |
| H | 0.82010900  | 2.19926500  | -0.47219300 |
| H | 2.42146700  | 1.89433100  | -0.27339500 |
| N | -1.43473800 | 0.08055100  | 0.02959900  |
| O | -1.63402700 | 1.28101200  | 0.25787300  |
| O | -2.30685300 | -0.74772900 | -0.23781100 |

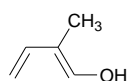**Butadiene (Product)**

|   |             |             |             |
|---|-------------|-------------|-------------|
| C | 0.01122500  | 0.32820500  | -0.07810900 |
| C | 1.47159300  | 0.24825500  | -0.24537500 |
| C | 2.28255500  | -0.71787500 | 0.21738400  |
| H | 1.92195400  | 1.08116800  | -0.79044500 |
| H | 3.34865200  | -0.70703700 | 0.00642800  |
| H | 1.91188000  | -1.53907600 | 0.82695200  |
| C | -0.73530200 | -0.78846200 | -0.14383500 |
| H | -0.29878200 | -1.75952000 | -0.36771600 |
| O | -2.09276700 | -0.77479700 | 0.07743500  |
| H | -2.47868600 | -1.61548700 | -0.20676900 |
| C | -0.59943900 | 1.69271800  | 0.13783800  |
| H | -1.68917500 | 1.66260800  | 0.05817800  |
| H | -0.34137700 | 2.09059600  | 1.12903000  |
| H | -0.21612800 | 2.40808000  | -0.60255300 |

**Transition state**

|   |             |             |             |
|---|-------------|-------------|-------------|
| C | 0.14772700  | -0.60078400 | -0.12444400 |
| C | -1.19941300 | -0.90127200 | -0.06940800 |
| C | -1.86242900 | 0.32608300  | 0.23321400  |
| H | -1.67761800 | -1.84741200 | -0.32637600 |
| H | -2.85227100 | 0.56657400  | -0.17068600 |
| H | -1.64593000 | 0.82088500  | 1.17424800  |
| C | 0.12869700  | 0.81105300  | -0.36221400 |
| H | -0.26689100 | 1.19467200  | -1.29662400 |
| O | 1.09862400  | 1.60043800  | 0.21361300  |
| H | 1.15942200  | 2.45376300  | -0.24388100 |
| C | 1.36182500  | -1.45662700 | 0.09939400  |
| H | 1.72895300  | -1.37399300 | 1.13150300  |
| H | 1.11639800  | -2.51126400 | -0.07411800 |
| H | 2.19050600  | -1.17744200 | -0.56221500 |

**Cyclobutene (Starting material)**

|   |             |             |             |
|---|-------------|-------------|-------------|
| C | 0.71314900  | 0.19713500  | 0.04077200  |
| C | 0.22374000  | 1.42280100  | -0.22085400 |
| C | -1.22786700 | 1.05306900  | 0.03538000  |
| H | 0.69613900  | 2.36421700  | -0.49412400 |
| H | -1.86525000 | 1.01293500  | -0.85554500 |
| H | -1.75211100 | 1.59958100  | 0.83198800  |
| C | -0.64593300 | -0.35695000 | 0.42588500  |
| H | -0.74761600 | -0.58255000 | 1.49933500  |
| O | -1.04318100 | -1.48132600 | -0.35088600 |
| H | -1.89889700 | -1.80468000 | -0.02785300 |
| C | 2.05361300  | -0.45475000 | 0.01977500  |
| H | 2.05448400  | -1.31544900 | -0.66150400 |
| H | 2.83276900  | 0.24388700  | -0.30524100 |
| H | 2.32572000  | -0.83516600 | 1.01428700  |

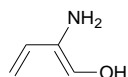

### Butadiene (Product)

|   |             |             |             |
|---|-------------|-------------|-------------|
| C | 0.01772400  | 0.32279500  | -0.07862000 |
| C | 1.47335200  | 0.24827200  | -0.26187700 |
| C | 2.27866700  | -0.70703900 | 0.22937100  |
| H | 1.90466700  | 1.06201800  | -0.84746200 |
| H | 3.34192500  | -0.71516300 | 0.00490600  |
| H | 1.90303600  | -1.50359600 | 0.86717200  |
| C | -0.76220800 | -0.77502800 | -0.14279800 |
| H | -0.37156000 | -1.75721300 | -0.38583000 |
| O | -2.12070100 | -0.67050500 | 0.11294400  |
| H | -2.59490900 | -1.39056200 | -0.32658300 |
| N | -0.52899700 | 1.61750800  | 0.04875900  |
| H | -1.52317000 | 1.60495200  | 0.25351000  |
| H | -0.03661600 | 2.20705000  | 0.71297000  |

### Transition state

|   |             |             |             |
|---|-------------|-------------|-------------|
| C | -0.05960700 | 0.62191300  | 0.12125900  |
| C | -1.43575300 | 0.47584500  | 0.09896800  |
| C | -1.64663600 | -0.89606300 | -0.23628300 |
| H | -2.19059200 | 1.20350500  | 0.39491600  |
| H | -2.47975200 | -1.46670300 | 0.19173400  |
| H | -1.31265000 | -1.27606800 | -1.19646200 |
| C | 0.41549600  | -0.71324500 | 0.33777100  |
| H | 0.18048300  | -1.20087500 | 1.27727200  |
| O | 1.62989000  | -1.08499700 | -0.21085400 |
| H | 1.95826900  | -1.88727800 | 0.22295200  |
| N | 0.75219500  | 1.71330400  | -0.17251400 |
| H | 0.27527300  | 2.60108000  | -0.26726100 |
| H | 1.62348300  | 1.78248000  | 0.34099500  |

### Cyclobutene (Starting material)

|   |            |            |             |
|---|------------|------------|-------------|
| C | 0.74006900 | 0.15761100 | 0.04086300  |
| C | 0.33431600 | 1.42039300 | -0.21647800 |

|   |             |             |             |
|---|-------------|-------------|-------------|
| C | -1.13761800 | 1.11234000  | 0.02514200  |
| H | 0.85504800  | 2.33992000  | -0.46710200 |
| H | -1.77571800 | 1.10647800  | -0.86713500 |
| H | -1.64511700 | 1.66705900  | 0.82794900  |
| C | -0.63634400 | -0.32517300 | 0.41955400  |
| H | -0.74966700 | -0.54240600 | 1.49250500  |
| O | -1.07222400 | -1.43952300 | -0.35529200 |
| H | -1.94312800 | -1.72611100 | -0.03844600 |
| N | 1.92759900  | -0.54897000 | 0.10927300  |
| H | 1.83108200  | -1.53809800 | -0.09532500 |
| H | 2.70955700  | -0.13889600 | -0.38950000 |

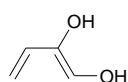

### Butadiene (Product)

|   |             |             |             |
|---|-------------|-------------|-------------|
| C | 0.01192900  | 0.32670100  | -0.06786800 |
| C | 1.45969800  | 0.20916300  | -0.26419100 |
| C | 2.24277800  | -0.76885800 | 0.22045500  |
| H | 1.91205400  | 1.00587000  | -0.85959500 |
| H | 3.30206000  | -0.81068600 | -0.01788400 |
| H | 1.84916100  | -1.55396900 | 0.86148800  |
| C | -0.82756900 | -0.72247200 | -0.14164000 |
| H | -0.45236900 | -1.70834500 | -0.39692500 |
| O | -2.17209600 | -0.59165500 | 0.09182900  |
| H | -2.63001900 | -1.39339600 | -0.19768600 |
| O | -0.50876300 | 1.59690300  | 0.10471500  |
| H | 0.14497200  | 2.15133200  | 0.55770700  |

### Transition state

|   |             |             |             |
|---|-------------|-------------|-------------|
| C | -0.13680900 | 0.60884300  | 0.12218400  |
| C | -1.47698700 | 0.29337300  | 0.07261300  |
| C | -1.48981500 | -1.10221700 | -0.23080900 |
| H | -2.32496700 | 0.91496400  | 0.35731600  |
| H | -2.22919300 | -1.77570300 | 0.21632200  |
| H | -1.08927200 | -1.45536300 | -1.17458300 |
| C | 0.54179500  | -0.62580700 | 0.35230100  |



|   |             |             |             |
|---|-------------|-------------|-------------|
| H | 0.36641700  | -1.15988600 | 1.27952500  |
| O | 1.76432400  | -0.84374600 | -0.22984600 |
| H | 2.25200800  | -1.52912100 | 0.25251900  |
| O | 0.53767600  | 1.78803000  | -0.05475800 |
| H | -0.02009600 | 2.40568000  | -0.55200100 |

### Cyclobutene (Starting material)

|   |             |             |             |
|---|-------------|-------------|-------------|
| C | 0.75282700  | 0.02359000  | 0.03966300  |
| C | 0.55633000  | 1.32800500  | -0.22477900 |
| C | -0.94239000 | 1.24114100  | 0.04279000  |
| H | 1.20803700  | 2.15517300  | -0.48936300 |
| H | -1.58739700 | 1.33648500  | -0.83796800 |
| H | -1.33419700 | 1.86740400  | 0.85612900  |
| C | -0.67249900 | -0.26705400 | 0.42143100  |
| H | -0.81091100 | -0.47673700 | 1.49236500  |
| O | -1.29108900 | -1.26861300 | -0.36939800 |
| H | -2.17324100 | -1.45321800 | -0.01138700 |
| O | 1.78316000  | -0.85233000 | 0.06401000  |
| H | 2.59553000  | -0.41565500 | -0.24130300 |

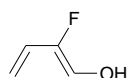

### Butadiene (Product)

|   |             |             |             |
|---|-------------|-------------|-------------|
| C | -0.02468600 | 0.30917600  | 0.05393600  |
| C | -1.47474700 | 0.27024100  | 0.19183700  |
| C | -2.27554900 | -0.74636200 | -0.16597300 |
| H | -1.90741900 | 1.16942200  | 0.62990900  |
| H | -3.34323000 | -0.71023300 | 0.02871400  |
| H | -1.89660400 | -1.63698300 | -0.66135300 |
| C | 0.83125700  | -0.72094300 | 0.12797400  |
| H | 0.45848400  | -1.71910700 | 0.33585000  |
| O | 2.17341600  | -0.56169800 | -0.06919800 |
| H | 2.63854700  | -1.37329100 | 0.17916400  |
| F | 0.48058300  | 1.56567800  | -0.13392800 |

**Transition state**

|   |             |             |             |
|---|-------------|-------------|-------------|
| C | -0.15110500 | 0.60538500  | 0.10710800  |
| C | -1.48437500 | 0.30991200  | 0.03883600  |
| C | -1.48245700 | -1.09730100 | -0.21034200 |
| H | -2.33138300 | 0.94472700  | 0.28692700  |
| H | -2.21102100 | -1.76256500 | 0.26374600  |
| H | -1.07167700 | -1.47559900 | -1.13926000 |
| C | 0.55263900  | -0.60238400 | 0.36555200  |
| H | 0.38421600  | -1.13125100 | 1.29727900  |
| O | 1.76447800  | -0.81598000 | -0.23001700 |
| H | 2.26990300  | -1.48738000 | 0.25426100  |
| F | 0.47065900  | 1.79402600  | -0.10330400 |

**Cyclobutene (Starting material)**

|   |             |             |             |
|---|-------------|-------------|-------------|
| C | 0.75190000  | -0.02201100 | 0.03161800  |
| C | 0.66621800  | 1.28364200  | -0.23166200 |
| C | -0.83548900 | 1.29390400  | 0.04620400  |
| H | 1.37739600  | 2.05731200  | -0.49609100 |
| H | -1.47173900 | 1.43558700  | -0.83328000 |
| H | -1.17150700 | 1.94665900  | 0.86207400  |
| C | -0.68095800 | -0.23530800 | 0.42390700  |
| H | -0.83096700 | -0.43161000 | 1.49522800  |
| O | -1.36967900 | -1.18503600 | -0.36678900 |
| H | -2.24592700 | -1.34413000 | 0.01686300  |
| F | 1.76557200  | -0.90054400 | 0.02990200  |

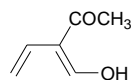**Butadiene (Product)**

|   |             |             |             |
|---|-------------|-------------|-------------|
| C | -0.32179000 | 0.05171300  | -0.09942500 |
| C | -1.66804300 | -0.54820400 | -0.21664000 |
| C | -2.80193800 | -0.04101300 | 0.28872900  |
| H | -1.69788700 | -1.50078300 | -0.74031500 |
| H | -3.75574300 | -0.53590100 | 0.12782800  |
| H | -2.82076400 | 0.86361900  | 0.89391200  |

|   |             |             |             |
|---|-------------|-------------|-------------|
| C | -0.20491100 | 1.40010800  | -0.15660800 |
| H | -1.08734200 | 2.01190000  | -0.33383100 |
| O | 0.95942900  | 2.08822300  | -0.00816900 |
| H | 0.80626600  | 3.03084400  | -0.16991300 |
| C | 0.81875100  | -0.91156500 | 0.00726800  |
| C | 2.23990500  | -0.41504600 | 0.18619300  |
| H | 2.54585300  | 0.21263900  | -0.65821400 |
| H | 2.33116400  | 0.20585800  | 1.08439900  |
| H | 2.89986100  | -1.28193500 | 0.26343000  |
| O | 0.59141400  | -2.11599900 | -0.05738000 |

**Transition state**

|   |             |             |             |
|---|-------------|-------------|-------------|
| C | 0.12774800  | -0.34124000 | 0.12030500  |
| C | 0.99756100  | -1.42152900 | 0.08513700  |
| C | 2.27300600  | -0.86972900 | -0.21064400 |
| H | 0.78263400  | -2.44612000 | 0.38168400  |
| H | 3.19908900  | -1.30252000 | 0.17936900  |
| H | 2.40240900  | -0.32492000 | -1.14053300 |
| C | 1.04072100  | 0.74618000  | 0.36643700  |
| H | 1.55164500  | 0.81089200  | 1.32208100  |
| O | 0.87799000  | 1.94097500  | -0.27855600 |
| H | 1.39262700  | 2.63976100  | 0.15706100  |
| C | -1.34369100 | -0.34522900 | -0.01140900 |
| C | -2.09285300 | 0.97422800  | 0.03305700  |
| H | -1.85678300 | 1.57188200  | -0.85553600 |
| H | -3.16650800 | 0.77523400  | 0.06397200  |
| H | -1.79927100 | 1.57212900  | 0.90435200  |
| O | -1.94308900 | -1.41002900 | -0.13516200 |

**Cyclobutene (Starting material)**

|   |            |             |             |
|---|------------|-------------|-------------|
| C | 0.00611800 | -0.40732000 | 0.07193400  |
| C | 0.76189100 | -1.51778200 | -0.05621000 |
| C | 2.08202500 | -0.79761300 | 0.12754400  |
| H | 0.50771400 | -2.56354200 | -0.20349800 |
| H | 2.69131300 | -0.72202800 | -0.78035700 |
| H | 2.71465000 | -1.12719400 | 0.96272500  |
| C | 1.19987500 | 0.48683200  | 0.36777900  |

|   |             |             |             |
|---|-------------|-------------|-------------|
| H | 1.24529700  | 0.84792200  | 1.40613400  |
| O | 1.34570200  | 1.56777900  | -0.54140200 |
| H | 2.10169500  | 2.11333100  | -0.27228000 |
| C | -1.45608200 | -0.17634000 | -0.00927500 |
| C | -1.94544800 | 1.23476200  | 0.23860800  |
| H | -1.43237100 | 1.93719500  | -0.42920000 |
| H | -3.02610500 | 1.28542600  | 0.08861300  |
| H | -1.70505600 | 1.54239300  | 1.26570600  |
| O | -2.21912900 | -1.09887100 | -0.26861200 |

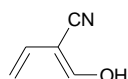

### Butadiene (Product)

|   |             |             |             |
|---|-------------|-------------|-------------|
| C | -0.08567900 | -0.10665100 | -0.10009300 |
| C | -1.48551900 | -0.55797800 | -0.24736500 |
| C | -2.56150000 | 0.07543600  | 0.24064300  |
| H | -1.61801900 | -1.48896100 | -0.79677000 |
| H | -3.56274000 | -0.29887400 | 0.04831800  |
| H | -2.48246900 | 0.96974300  | 0.85459200  |
| C | 0.25653300  | 1.20332700  | -0.12625500 |
| H | -0.49680400 | 1.96579200  | -0.30904600 |
| O | 1.52750900  | 1.62112500  | 0.06620900  |
| H | 1.60236700  | 2.57354600  | -0.09439000 |
| C | 0.92837500  | -1.10941300 | 0.03660500  |
| N | 1.71776300  | -1.95979600 | 0.13520200  |

### Transition state

|   |             |             |             |
|---|-------------|-------------|-------------|
| C | -0.21861100 | -0.35592300 | 0.14116300  |
| C | 0.63889700  | -1.44190600 | 0.04934900  |
| C | 1.90823200  | -0.88042100 | -0.25569000 |
| H | 0.42519400  | -2.47604200 | 0.31322800  |
| H | 2.83943300  | -1.31987500 | 0.11195700  |
| H | 2.01866700  | -0.31741300 | -1.17691500 |
| C | 0.68601200  | 0.73695000  | 0.38283500  |
| H | 1.21855700  | 0.77753100  | 1.32710400  |
| O | 0.47469900  | 1.93004200  | -0.23176400 |

|   |             |             |             |
|---|-------------|-------------|-------------|
| H | 0.94302000  | 2.64701800  | 0.22606000  |
| C | -1.63193400 | -0.27137700 | -0.00853300 |
| N | -2.79114900 | -0.21078500 | -0.11458100 |

### Cyclobutene (Starting material)

|   |             |             |             |
|---|-------------|-------------|-------------|
| C | -0.37075100 | -0.35022800 | 0.03263200  |
| C | 0.33655800  | -1.47052100 | -0.22002000 |
| C | 1.68383100  | -0.82973100 | 0.04416200  |
| H | 0.04030500  | -2.48275900 | -0.47916400 |
| H | 2.30142200  | -0.67744800 | -0.84739400 |
| H | 2.29330800  | -1.27665500 | 0.84019100  |
| C | 0.85755400  | 0.46188900  | 0.42212500  |
| H | 0.89578100  | 0.70080200  | 1.49355600  |
| O | 1.05246400  | 1.61569600  | -0.36628400 |
| H | 1.69009400  | 2.20287700  | 0.06808300  |
| C | -1.75315800 | -0.02380100 | 0.01413700  |
| N | -2.88069000 | 0.26885300  | 0.01382600  |

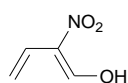

### Butadiene (Product)

|   |             |             |             |
|---|-------------|-------------|-------------|
| C | -0.23857300 | 0.10201300  | -0.10882600 |
| C | -1.64390700 | -0.30299700 | -0.25608200 |
| C | -2.68329600 | 0.35587700  | 0.27522300  |
| H | -1.81480400 | -1.20311900 | -0.83998300 |
| H | -3.70253500 | 0.03493600  | 0.08153100  |
| H | -2.55787200 | 1.21689100  | 0.92828900  |
| C | 0.14085500  | 1.40373500  | -0.15073800 |
| H | -0.64061800 | 2.13595300  | -0.34246300 |
| O | 1.38127700  | 1.88292700  | 0.02240200  |
| H | 1.38251800  | 2.84332300  | -0.11542700 |
| N | 0.73243200  | -0.97707000 | 0.03164100  |
| O | 1.92408800  | -0.69310500 | 0.16626000  |
| O | 0.28911200  | -2.13235400 | -0.00002400 |

**Transition state**

|   |             |             |             |
|---|-------------|-------------|-------------|
| C | 0.03847800  | -0.29116700 | 0.12781100  |
| C | 0.69367300  | -1.50093200 | 0.09255000  |
| C | 2.04322000  | -1.14431700 | -0.17438400 |
| H | 0.31064700  | -2.47194800 | 0.39532400  |
| H | 2.88151000  | -1.69664900 | 0.25679900  |
| H | 2.27504800  | -0.63038700 | -1.10131900 |
| C | 1.06848400  | 0.68139400  | 0.36318800  |
| H | 1.57628000  | 0.68622300  | 1.32260800  |
| O | 1.10546100  | 1.83287400  | -0.34065500 |
| H | 1.65181800  | 2.49975300  | 0.10634500  |
| N | -1.37299100 | -0.04101500 | -0.00613700 |
| O | -2.09675700 | -1.02249600 | -0.21361100 |
| O | -1.77714000 | 1.11840200  | 0.13029200  |

**Cyclobutene (Starting material)**

|   |             |             |             |
|---|-------------|-------------|-------------|
| C | -0.06048200 | -0.35617500 | 0.08052000  |
| C | 0.55434600  | -1.52963800 | -0.12080500 |
| C | 1.93079200  | -0.91709600 | 0.09785300  |
| H | 0.20716900  | -2.53430800 | -0.33611400 |
| H | 2.54456000  | -0.85318000 | -0.80619900 |
| H | 2.52240100  | -1.33659200 | 0.91918500  |
| C | 1.18992800  | 0.43315500  | 0.39917400  |
| H | 1.26128200  | 0.74965500  | 1.44842900  |
| O | 1.55765200  | 1.47191600  | -0.48008400 |
| H | 0.91705300  | 2.19638300  | -0.38173500 |
| N | -1.43572400 | 0.05749400  | 0.02673200  |
| O | -2.29938200 | -0.78524100 | -0.21733500 |
| O | -1.64450700 | 1.26258800  | 0.22602600  |

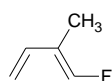**Butadiene (Product)**

|   |             |            |             |
|---|-------------|------------|-------------|
| C | -0.01351200 | 0.30814200 | -0.08067200 |
| C | 1.44986900  | 0.27000800 | -0.27391700 |

|   |             |             |             |
|---|-------------|-------------|-------------|
| C | 2.28976400  | -0.64213700 | 0.23752900  |
| H | 1.86184700  | 1.08332500  | -0.87478900 |
| H | 3.35448600  | -0.60965300 | 0.02238900  |
| H | 1.94480300  | -1.43845600 | 0.89301200  |
| C | -0.71201100 | -0.82986700 | -0.15410500 |
| H | -0.31546300 | -1.81148300 | -0.38630200 |
| F | -2.05932300 | -0.86609800 | 0.04361000  |
| C | -0.65894300 | 1.65201300  | 0.15557800  |
| H | -1.74860400 | 1.57975000  | 0.18845500  |
| H | -0.31173500 | 2.08878700  | 1.10098900  |
| H | -0.38243200 | 2.35366500  | -0.64272400 |

**Transition state**

|   |             |             |             |
|---|-------------|-------------|-------------|
| C | 0.19298900  | -0.56793000 | -0.11307200 |
| C | -1.13661800 | -0.96142800 | -0.08044300 |
| C | -1.88639000 | 0.20112400  | 0.24644300  |
| H | -1.54886600 | -1.92159300 | -0.39089500 |
| H | -2.88697600 | 0.38078200  | -0.16057100 |
| H | -1.69768800 | 0.71020700  | 1.18457800  |
| C | 0.05581700  | 0.82301200  | -0.35916300 |
| H | -0.34271400 | 1.22702400  | -1.28106500 |
| F | 0.99426600  | 1.69581400  | 0.14580800  |
| C | 1.46452400  | -1.33422300 | 0.10822000  |
| H | 1.81658600  | -1.22975500 | 1.14320700  |
| H | 1.29746600  | -2.40253700 | -0.07160300 |
| H | 2.27186200  | -0.98979000 | -0.54783100 |

**Cyclobutene (Starting material)**

|   |             |             |             |
|---|-------------|-------------|-------------|
| C | 0.70118300  | 0.21686900  | 0.03582600  |
| C | 0.14015600  | 1.41500800  | -0.21564800 |
| C | -1.29026100 | 0.96095200  | 0.03869100  |
| H | 0.55667700  | 2.38647400  | -0.47324400 |
| H | -1.92057500 | 0.87219900  | -0.85263500 |
| H | -1.85279100 | 1.47412100  | 0.82949900  |
| C | -0.62586100 | -0.39207000 | 0.43594400  |
| H | -0.73181300 | -0.68021200 | 1.48820600  |
| F | -1.04159500 | -1.50631000 | -0.31785700 |

|   |            |             |             |
|---|------------|-------------|-------------|
| C | 2.07650900 | -0.35782100 | 0.01279300  |
| H | 2.13002700 | -1.21081000 | -0.67617300 |
| H | 2.81426400 | 0.38701000  | -0.30520900 |
| H | 2.36821600 | -0.72962300 | 1.00463000  |

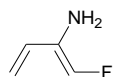

### Butadiene (Product)

|   |             |             |             |
|---|-------------|-------------|-------------|
| C | -0.00734300 | 0.30936800  | -0.07944500 |
| C | 1.45149200  | 0.26340900  | -0.28432800 |
| C | 2.27671500  | -0.64924400 | 0.24766100  |
| H | 1.85454500  | 1.05543800  | -0.91691400 |
| H | 3.33948100  | -0.64461200 | 0.02124900  |
| H | 1.91839400  | -1.42252100 | 0.92268100  |
| C | -0.74610200 | -0.81028900 | -0.15124200 |
| H | -0.40300800 | -1.79780000 | -0.42431400 |
| F | -2.10043100 | -0.74779000 | 0.05884300  |
| N | -0.57542100 | 1.58430200  | 0.06877500  |
| H | -1.56348800 | 1.57080100  | 0.29823900  |
| H | -0.06267100 | 2.19922200  | 0.69217800  |

### Transition state

|   |             |             |             |
|---|-------------|-------------|-------------|
| C | 0.03872900  | 0.60846100  | 0.10731800  |
| C | -1.34797000 | 0.66884100  | 0.09619200  |
| C | -1.76340100 | -0.64712300 | -0.25231800 |
| H | -1.98101100 | 1.48095400  | 0.44766000  |
| H | -2.66787500 | -1.08875300 | 0.18142000  |
| H | -1.49010700 | -1.07689200 | -1.20899200 |
| C | 0.27682700  | -0.77700900 | 0.33480000  |
| H | 0.02943500  | -1.25681000 | 1.27339000  |
| F | 1.45670600  | -1.32734600 | -0.15182200 |
| N | 0.99863200  | 1.60108700  | -0.03464400 |
| H | 0.82616800  | 2.28728700  | -0.75909800 |
| H | 1.95751200  | 1.27370000  | -0.04143000 |



**Cyclobutene (Starting material)**

|   |             |             |             |
|---|-------------|-------------|-------------|
| C | 0.72678800  | 0.18976800  | 0.03246900  |
| C | 0.22387300  | 1.42092400  | -0.21293200 |
| C | -1.22267900 | 1.00306700  | 0.03101000  |
| H | 0.67322800  | 2.38230500  | -0.44288700 |
| H | -1.85945600 | 0.93892800  | -0.85872500 |
| H | -1.77304700 | 1.51661200  | 0.83107500  |
| C | -0.61106500 | -0.37240300 | 0.42922600  |
| H | -0.72330300 | -0.65501900 | 1.48148300  |
| F | -1.05046600 | -1.48176100 | -0.32315300 |
| N | 1.96555600  | -0.41903400 | 0.09989800  |
| H | 1.96013100  | -1.41528000 | -0.08943500 |
| H | 2.71624700  | 0.05340600  | -0.39105600 |

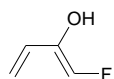**Butadiene (Product)**

|   |             |             |             |
|---|-------------|-------------|-------------|
| C | 0.01285600  | 0.30993300  | 0.07396500  |
| C | -1.43901200 | 0.22725700  | 0.29153800  |
| C | -2.24580900 | -0.70158300 | -0.24200300 |
| H | -1.85916100 | 0.99877800  | 0.94038000  |
| H | -3.30582700 | -0.72829400 | -0.00488800 |
| H | -1.87175500 | -1.45969300 | -0.92544700 |
| C | 0.81181400  | -0.76336700 | 0.15614300  |
| H | 0.48325000  | -1.75664800 | 0.43102900  |
| F | 2.14579500  | -0.67348800 | -0.06068200 |
| O | 0.56381900  | 1.55360100  | -0.13331700 |
| H | -0.10830500 | 2.14499400  | -0.50627400 |

**Transition state**

|   |             |             |             |
|---|-------------|-------------|-------------|
| C | 0.01285600  | 0.30993300  | 0.07396500  |
| C | -1.43901200 | 0.22725700  | 0.29153800  |
| C | -2.24580900 | -0.70158300 | -0.24200300 |
| H | -1.85916100 | 0.99877800  | 0.94038000  |
| H | -3.30582700 | -0.72829400 | -0.00488800 |

|   |             |             |             |
|---|-------------|-------------|-------------|
| H | -1.87175500 | -1.45969300 | -0.92544700 |
| C | 0.81181400  | -0.76336700 | 0.15614300  |
| H | 0.48325000  | -1.75664800 | 0.43102900  |
| F | 2.14579500  | -0.67348800 | -0.06068200 |
| O | 0.56381900  | 1.55360100  | -0.13331700 |
| H | -0.10830500 | 2.14499400  | -0.50627400 |

### Cyclobutene (Starting material)

|   |             |             |             |
|---|-------------|-------------|-------------|
| C | 0.74512800  | 0.07642600  | 0.03585400  |
| C | 0.42070300  | 1.35790000  | -0.21957600 |
| C | -1.06541200 | 1.12494300  | 0.04659900  |
| H | 0.98767700  | 2.24870500  | -0.47170300 |
| H | -1.71522900 | 1.14642400  | -0.83455600 |
| H | -1.52298200 | 1.71033800  | 0.85417200  |
| C | -0.64489100 | -0.32891300 | 0.43350900  |
| H | -0.78857800 | -0.60527700 | 1.48305700  |
| F | -1.23430600 | -1.34194000 | -0.33374000 |
| O | 1.84932100  | -0.70125900 | 0.05556500  |
| H | 2.62013200  | -0.19479500 | -0.25014900 |

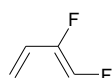

### Butadiene (Product)

|   |             |             |             |
|---|-------------|-------------|-------------|
| C | -0.00207400 | 0.29516100  | 0.06072300  |
| C | -1.45396300 | 0.29326100  | 0.22273000  |
| C | -2.27378000 | -0.68370800 | -0.19053900 |
| H | -1.85721000 | 1.17442000  | 0.72055100  |
| H | -3.34028800 | -0.63887300 | 0.00893500  |
| H | -1.91116100 | -1.54908800 | -0.73951800 |
| C | 0.81359100  | -0.76025800 | 0.14805900  |
| H | 0.48696300  | -1.76489000 | 0.38290400  |
| F | 2.14384700  | -0.64611400 | -0.04389900 |
| F | 0.53604800  | 1.52519100  | -0.15818000 |

**Transition state**

|   |             |             |             |
|---|-------------|-------------|-------------|
| C | -0.05868200 | 0.60328000  | 0.09262700  |
| C | -1.42436200 | 0.47630200  | 0.04927100  |
| C | -1.61038500 | -0.90898400 | -0.22144800 |
| H | -2.17849500 | 1.19912700  | 0.34915000  |
| H | -2.41210300 | -1.48114000 | 0.25462700  |
| H | -1.24640300 | -1.33368400 | -1.14863000 |
| C | 0.46217200  | -0.68057100 | 0.36251500  |
| H | 0.27126400  | -1.21081200 | 1.28663600  |
| F | 1.66778200  | -1.04486300 | -0.15896500 |
| F | 0.70480400  | 1.69890100  | -0.11209800 |

**Cyclobutene (Starting material)**

|   |             |             |             |
|---|-------------|-------------|-------------|
| C | 0.74694300  | 0.04251200  | 0.02670900  |
| C | 0.50897700  | 1.33137300  | -0.23053800 |
| C | -0.98593700 | 1.16985000  | 0.05371800  |
| H | 1.12458500  | 2.18482100  | -0.48920700 |
| H | -1.63909900 | 1.22991000  | -0.82194100 |
| H | -1.39489100 | 1.77964800  | 0.86776600  |
| C | -0.65012400 | -0.31097100 | 0.43757300  |
| H | -0.80414400 | -0.57859300 | 1.48744700  |
| F | -1.29469500 | -1.28426400 | -0.33004000 |
| F | 1.84962800  | -0.71711000 | 0.02239100  |

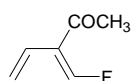**Butadiene (Product)**

|   |             |             |             |
|---|-------------|-------------|-------------|
| C | -0.33004700 | 0.06903500  | -0.11016500 |
| C | -1.67250700 | -0.54156000 | -0.22935600 |
| C | -2.79131400 | -0.05919400 | 0.32780800  |
| H | -1.70634200 | -1.46979300 | -0.79445800 |
| H | -3.74772500 | -0.55174300 | 0.17622900  |
| H | -2.79222600 | 0.82173700  | 0.96653500  |
| C | -0.22841800 | 1.40762900  | -0.17882000 |
| H | -1.05994200 | 2.08059100  | -0.35824800 |

|   |            |             |             |
|---|------------|-------------|-------------|
| F | 0.93115800 | 2.08862300  | -0.04677800 |
| C | 0.82999800 | -0.88414500 | 0.00607900  |
| C | 2.23674700 | -0.37121600 | 0.23386100  |
| O | 0.61222100 | -2.08456600 | -0.09119500 |
| H | 2.28979000 | 0.25903500  | 1.12857200  |
| H | 2.90211400 | -1.23016600 | 0.34406700  |
| H | 2.56939100 | 0.24597100  | -0.60858000 |

**Transition state**

|   |             |             |             |
|---|-------------|-------------|-------------|
| C | -0.08291200 | -0.23430400 | -0.16497600 |
| C | -0.68629100 | -1.49163900 | -0.13339700 |
| C | -2.03007800 | -1.27523400 | 0.24999000  |
| H | -0.28094900 | -2.43255300 | -0.50393600 |
| H | -2.84996500 | -1.90146800 | -0.11120800 |
| H | -2.23877700 | -0.76304600 | 1.18317000  |
| C | -1.22054300 | 0.60523200  | -0.35828800 |
| H | -1.81194500 | 0.58424200  | -1.26555300 |
| F | -1.32854200 | 1.80833200  | 0.24617700  |
| C | 1.33227700  | 0.17565900  | -0.02649200 |
| C | 2.35299000  | -0.93670900 | 0.14887400  |
| H | 2.21525000  | -1.72970800 | -0.59676400 |
| H | 3.35816200  | -0.51922900 | 0.05888300  |
| H | 2.24218500  | -1.39771800 | 1.13867500  |
| O | 1.66628200  | 1.35330700  | -0.05164000 |

**Cyclobutene (Starting material)**

|   |             |             |             |
|---|-------------|-------------|-------------|
| C | -0.01640900 | 0.26995300  | -0.09462600 |
| C | 0.56393900  | 1.48879800  | -0.02655200 |
| C | 1.98240800  | 0.96636100  | -0.16315100 |
| H | 0.16740500  | 2.49959600  | 0.03512400  |
| H | 2.59072700  | 1.03429000  | 0.74502600  |
| H | 2.56490900  | 1.33300100  | -1.01740600 |
| C | 1.30593000  | -0.43274900 | -0.33164200 |
| H | 1.42839500  | -0.91208300 | -1.30696800 |
| F | 1.67965500  | -1.36807000 | 0.63613400  |
| C | -1.40587700 | -0.23598200 | -0.09273000 |
| C | -2.50179500 | 0.71083500  | 0.35779800  |

|   |             |             |             |
|---|-------------|-------------|-------------|
| H | -2.41673900 | 1.68618800  | -0.13634100 |
| H | -3.47738300 | 0.27038000  | 0.14030100  |
| H | -2.41948400 | 0.88464300  | 1.43862300  |
| O | -1.64048800 | -1.38583500 | -0.43976800 |

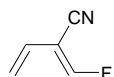

### Butadiene (Product)

|   |             |             |             |
|---|-------------|-------------|-------------|
| C | -0.07998100 | -0.08506000 | -0.11291200 |
| C | -1.46749900 | -0.57592000 | -0.28059800 |
| C | -2.54727400 | -0.00611000 | 0.26915000  |
| H | -1.57598100 | -1.47040600 | -0.89160600 |
| H | -3.54208900 | -0.39620800 | 0.07496000  |
| H | -2.47595700 | 0.84896600  | 0.93706200  |
| C | 0.21471000  | 1.22718600  | -0.13620700 |
| H | -0.50306500 | 2.01962900  | -0.31488800 |
| F | 1.46110800  | 1.68328100  | 0.05172200  |
| C | 0.96496800  | -1.05627000 | 0.03903300  |
| N | 1.77679600  | -1.88206600 | 0.15116800  |

### Transition state

|   |             |             |             |
|---|-------------|-------------|-------------|
| C | -0.19258300 | -0.34455500 | 0.14199100  |
| C | 0.71658000  | -1.39698300 | 0.07159600  |
| C | 1.95080600  | -0.80272600 | -0.28215600 |
| H | 0.56038400  | -2.42417300 | 0.39431400  |
| H | 2.90713700  | -1.19004400 | 0.07784000  |
| H | 2.01789100  | -0.23150600 | -1.20162500 |
| C | 0.66628900  | 0.76782600  | 0.37747500  |
| H | 1.23101900  | 0.88110800  | 1.29413800  |
| F | 0.38322800  | 1.97827500  | -0.16184200 |
| C | -1.60779600 | -0.32443000 | -0.00972800 |
| N | -2.76646500 | -0.31923600 | -0.12902100 |

### Cyclobutene (Starting material)

|   |             |             |            |
|---|-------------|-------------|------------|
| C | -0.36874600 | -0.33774500 | 0.02880000 |
|---|-------------|-------------|------------|

|   |             |             |             |
|---|-------------|-------------|-------------|
| C | 0.36390600  | -1.44362400 | -0.22050200 |
| C | 1.69917800  | -0.77481800 | 0.04899500  |
| H | 0.09104900  | -2.46335300 | -0.47565100 |
| H | 2.31468600  | -0.60052500 | -0.83959800 |
| H | 2.31970100  | -1.20736300 | 0.84270800  |
| C | 0.84838700  | 0.47686500  | 0.43699400  |
| H | 0.88816300  | 0.77405700  | 1.48914800  |
| F | 1.09857100  | 1.61602700  | -0.32283800 |
| C | -1.75610100 | -0.03621600 | 0.01153400  |
| N | -2.88864100 | 0.23516800  | 0.00771600  |

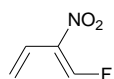

### Butadiene (Product)

|   |             |             |             |
|---|-------------|-------------|-------------|
| C | -0.26772800 | 0.09963200  | -0.10065300 |
| C | -1.63057200 | -0.44292500 | -0.19620600 |
| C | -2.69673200 | 0.13035300  | 0.37775100  |
| H | -1.73378100 | -1.36183300 | -0.76627700 |
| H | -3.69072200 | -0.28549500 | 0.24225600  |
| H | -2.61522300 | 1.01418800  | 1.00615600  |
| C | -0.00089800 | 1.40952100  | -0.23722900 |
| H | -0.77921100 | 2.13138100  | -0.46108500 |
| F | 1.20713300  | 1.96265600  | -0.15891300 |
| N | 0.82371000  | -0.87758100 | 0.06197900  |
| O | 1.86187700  | -0.51134300 | 0.60561500  |
| O | 0.60866700  | -2.01347800 | -0.36644800 |

### Transition state

|   |             |             |             |
|---|-------------|-------------|-------------|
| C | -0.26772800 | 0.09963200  | -0.10065300 |
| C | -1.63057200 | -0.44292500 | -0.19620600 |
| C | -2.69673200 | 0.13035300  | 0.37775100  |
| H | -1.73378100 | -1.36183300 | -0.76627700 |
| H | -3.69072200 | -0.28549500 | 0.24225600  |

|   |             |             |             |
|---|-------------|-------------|-------------|
| H | -2.61522300 | 1.01418800  | 1.00615600  |
| C | -0.00089800 | 1.40952100  | -0.23722900 |
| H | -0.77921100 | 2.13138100  | -0.46108500 |
| F | 1.20713300  | 1.96265600  | -0.15891300 |
| N | 0.82371000  | -0.87758100 | 0.06197900  |
| O | 1.86187700  | -0.51134300 | 0.60561500  |
| O | 0.60866700  | -2.01347800 | -0.36644800 |

### Cyclobutene (Starting material)

|   |             |             |             |
|---|-------------|-------------|-------------|
| C | 0.05925800  | 0.30811300  | 0.05730300  |
| C | -0.54765500 | 1.49836000  | -0.05294000 |
| C | -1.93034100 | 0.89812500  | 0.15860500  |
| H | -0.18517900 | 2.51216900  | -0.18159300 |
| H | -2.57075600 | 0.89669800  | -0.72877800 |
| H | -2.49268900 | 1.27513100  | 1.02029900  |
| C | -1.19155000 | -0.46955500 | 0.36652500  |
| H | -1.25963600 | -0.90822800 | 1.36514400  |
| F | -1.53774500 | -1.45452800 | -0.55024200 |
| N | 1.45052600  | -0.07316000 | 0.01999800  |
| O | 2.26535800  | 0.78081800  | -0.33587300 |
| O | 1.71664300  | -1.22871400 | 0.35589200  |

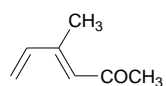

### Butadiene (Product)

|   |             |             |             |
|---|-------------|-------------|-------------|
| C | 0.83940000  | 0.40371000  | -0.13050500 |
| C | 2.25746900  | -0.01517500 | -0.20478800 |
| C | 2.78048700  | -1.12755400 | 0.33298200  |
| H | 2.92832800  | 0.68304000  | -0.70764900 |
| H | 3.83835200  | -1.35415700 | 0.23189800  |
| H | 2.17884200  | -1.83447700 | 0.89893100  |
| C | -0.13462900 | -0.54194500 | -0.17287000 |
| H | 0.17809000  | -1.57153700 | -0.33136800 |
| C | -1.60990200 | -0.46658600 | -0.03764000 |
| O | -2.24658200 | -1.51135100 | -0.16121100 |
| C | -2.35767800 | 0.82174900  | 0.26689000  |

|   |             |            |             |
|---|-------------|------------|-------------|
| H | -1.92390100 | 1.35797200 | 1.11768700  |
| H | -2.34009700 | 1.49542600 | -0.59911800 |
| H | -3.39736700 | 0.56811800 | 0.48610500  |
| C | 0.65743200  | 1.90089600 | -0.02513200 |
| H | -0.35042400 | 2.24285500 | -0.25213000 |
| H | 0.91840900  | 2.24719800 | 0.98488200  |
| H | 1.34695200  | 2.40579800 | -0.71318400 |

**Transition state**

|   |             |             |             |
|---|-------------|-------------|-------------|
| C | -1.17596200 | 0.34318400  | 0.21272800  |
| C | -2.06451200 | -0.67832500 | -0.02807200 |
| C | -1.27537300 | -1.80355700 | -0.42559400 |
| H | -3.14367100 | -0.68773400 | 0.12415700  |
| H | -1.52596500 | -2.82918800 | -0.13358300 |
| H | -0.66460400 | -1.73850900 | -1.31876500 |
| C | 0.08065000  | -0.35333100 | 0.42189900  |
| H | 0.13213000  | -1.04856800 | 1.25592200  |
| C | 1.39234400  | 0.14554300  | -0.05801300 |
| O | 1.48012400  | 1.14733900  | -0.76479900 |
| C | 2.62634100  | -0.64328600 | 0.34898700  |
| H | 2.80376100  | -0.52870000 | 1.42710100  |
| H | 2.49197600  | -1.71528500 | 0.15841800  |
| H | 3.49884000  | -0.27696700 | -0.19667000 |
| C | -1.41610200 | 1.82480800  | 0.22139500  |
| H | -0.86763500 | 2.32815500  | 1.02492600  |
| H | -1.08401900 | 2.27404100  | -0.72200000 |
| H | -2.48611700 | 2.03384200  | 0.33890000  |

**Cyclobutene (Starting material)**

|   |             |             |             |
|---|-------------|-------------|-------------|
| C | -1.25951200 | -0.24482400 | -0.11774700 |
| C | -1.70340400 | 0.89803400  | 0.43536400  |
| C | -0.50844600 | 1.72407600  | 0.00509700  |
| H | -2.60882300 | 1.15634200  | 0.98066800  |
| H | 0.11932200  | 2.13601800  | 0.80542700  |
| H | -0.70277200 | 2.51821700  | -0.72561100 |
| C | 0.02764500  | 0.38793300  | -0.65750700 |
| H | 0.09591300  | 0.44376900  | -1.74996800 |



|   |             |             |             |
|---|-------------|-------------|-------------|
| C | 1.36967200  | -0.10563300 | -0.13867200 |
| O | 2.33394100  | -0.18246400 | -0.88423500 |
| C | 1.47632300  | -0.50619300 | 1.32275400  |
| H | 0.87178600  | 0.13138900  | 1.97612600  |
| H | 1.10087200  | -1.53186100 | 1.44074000  |
| H | 2.52376200  | -0.48635100 | 1.63299400  |
| C | -1.78637900 | -1.63480800 | -0.25106300 |
| H | -1.09969900 | -2.37196000 | 0.18745200  |
| H | -2.75804800 | -1.73892800 | 0.24465600  |
| H | -1.90923500 | -1.90843300 | -1.30795400 |

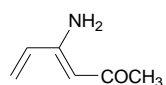

### Butadiene (Product)

|   |             |             |             |
|---|-------------|-------------|-------------|
| C | 0.82462100  | 0.40923400  | -0.10386600 |
| C | 2.25713900  | 0.04423300  | -0.20744900 |
| C | 2.81462500  | -1.06815400 | 0.28744300  |
| H | 2.88824500  | 0.77640500  | -0.71326400 |
| H | 3.87623400  | -1.26212600 | 0.16281200  |
| H | 2.23700100  | -1.81164800 | 0.83014300  |
| C | -0.14582500 | -0.55771800 | -0.15084700 |
| H | 0.19505400  | -1.57244600 | -0.32555000 |
| C | -1.60096500 | -0.46899800 | -0.02758900 |
| O | -2.27996800 | -1.49617800 | -0.09333500 |
| C | -2.30985200 | 0.86645400  | 0.18282500  |
| H | -1.97508300 | 1.35556300  | 1.10821900  |
| H | -2.13410400 | 1.54925900  | -0.65932000 |
| H | -3.38351400 | 0.68125000  | 0.26028800  |
| N | 0.62790500  | 1.77536300  | -0.04133400 |
| H | -0.28792500 | 2.13719900  | 0.17728800  |
| H | 1.39004500  | 2.33812400  | 0.31230400  |

### Transition state

|   |             |             |             |
|---|-------------|-------------|-------------|
| C | -1.18100900 | 0.40370700  | 0.17219100  |
| C | -2.11309500 | -0.59007100 | -0.05362400 |
| C | -1.31145200 | -1.74178900 | -0.35376500 |

|   |             |             |             |
|---|-------------|-------------|-------------|
| H | -3.19175900 | -0.56924000 | 0.08201800  |
| H | -1.57785100 | -2.73835100 | 0.02087800  |
| H | -0.70952500 | -1.77716300 | -1.25609800 |
| C | 0.04593300  | -0.33632900 | 0.44724000  |
| H | 0.05463900  | -0.96684300 | 1.33232200  |
| C | 1.37605800  | 0.14091400  | 0.01697700  |
| O | 1.54293900  | 1.27199900  | -0.44977800 |
| C | 2.53744100  | -0.83095800 | 0.12859300  |
| H | 2.48897700  | -1.41506300 | 1.05499100  |
| H | 2.49884000  | -1.54396200 | -0.70616400 |
| H | 3.48343000  | -0.28632700 | 0.07593400  |
| N | -1.29797500 | 1.77471500  | 0.16904600  |
| H | -2.01645500 | 2.16199600  | -0.43014000 |
| H | -0.41123300 | 2.26310800  | 0.09550200  |

**Cyclobutene (Starting material)**

|   |             |             |             |
|---|-------------|-------------|-------------|
| C | -1.24402000 | -0.31218200 | -0.14912000 |
| C | -1.77021600 | 0.78805700  | 0.43037700  |
| C | -0.61600100 | 1.68009700  | 0.01129400  |
| H | -2.67865100 | 0.98342500  | 0.99245200  |
| H | -0.00221800 | 2.10817000  | 0.81512900  |
| H | -0.84064500 | 2.47338500  | -0.71232500 |
| C | 0.00401900  | 0.38577600  | -0.66474300 |
| H | 0.08899400  | 0.46064200  | -1.75507700 |
| C | 1.35633000  | -0.05564300 | -0.11987400 |
| O | 2.33816200  | -0.07038300 | -0.84641700 |
| C | 1.43682000  | -0.48346300 | 1.33238200  |
| H | 0.87855800  | 0.19298200  | 1.98879700  |
| H | 0.97674300  | -1.47479100 | 1.43879000  |
| H | 2.48262700  | -0.53711000 | 1.64300700  |
| N | -1.55265300 | -1.66052600 | -0.22981400 |
| H | -1.23355100 | -2.12980200 | -1.07053500 |
| H | -2.51017500 | -1.90601100 | -0.00210400 |

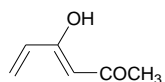

### Butadiene (Product)

|   |             |             |             |
|---|-------------|-------------|-------------|
| C | 0.82456200  | 0.40468800  | -0.05292000 |
| C | 2.27401200  | 0.14953600  | -0.10317000 |
| C | 2.88598100  | -1.01628200 | 0.14514100  |
| H | 2.86626200  | 1.02966400  | -0.34599400 |
| H | 3.96662900  | -1.09797000 | 0.07670900  |
| H | 2.34627300  | -1.91546700 | 0.42958100  |
| C | -0.12902900 | -0.56815900 | -0.08717400 |
| H | 0.22342800  | -1.58932900 | -0.18524100 |
| C | -1.59159600 | -0.47954400 | -0.01598300 |
| O | -2.26369900 | -1.50919700 | -0.05181700 |
| C | -2.30689400 | 0.86516000  | 0.10222700  |
| H | -2.00879600 | 1.40446200  | 1.01263000  |
| H | -2.11587400 | 1.50144100  | -0.77438300 |
| H | -3.38278200 | 0.68374000  | 0.15438700  |
| O | 0.60231200  | 1.74717400  | 0.01218100  |
| H | -0.34626400 | 1.94725500  | 0.02067300  |

### Transition state

|   |             |             |             |
|---|-------------|-------------|-------------|
| C | 1.14468300  | 0.41413700  | -0.24249200 |
| C | 2.13006400  | -0.50329300 | 0.03502500  |
| C | 1.40534700  | -1.66778800 | 0.43745700  |
| H | 3.20242100  | -0.43765800 | -0.13870400 |
| H | 1.72116100  | -2.67169900 | 0.13415800  |
| H | 0.77562300  | -1.64887100 | 1.31880800  |
| C | -0.07829400 | -0.32764000 | -0.44152400 |
| H | -0.10293800 | -1.00788100 | -1.28783400 |
| C | -1.39144800 | 0.09077800  | 0.10593600  |
| O | -1.47944800 | 0.90147400  | 1.02341400  |
| C | -2.62450300 | -0.57907700 | -0.47942500 |
| H | -2.77436600 | -0.24644800 | -1.51553400 |
| H | -2.50597400 | -1.66978600 | -0.50640400 |
| H | -3.50549200 | -0.31895500 | 0.11166500  |
| O | 1.19188400  | 1.76433900  | -0.36101800 |

|   |            |            |            |
|---|------------|------------|------------|
| H | 1.97498500 | 2.11209100 | 0.09480800 |
|---|------------|------------|------------|

**Cyclobutene (Starting material)**

|   |             |             |             |
|---|-------------|-------------|-------------|
| C | -1.23682000 | -0.36584700 | -0.13271900 |
| C | -1.81478800 | 0.71165900  | 0.42007900  |
| C | -0.69557000 | 1.63402000  | -0.03577700 |
| H | -2.73183000 | 0.88067000  | 0.97304100  |
| H | -0.10116200 | 2.11389200  | 0.75171800  |
| H | -0.96044000 | 2.38870600  | -0.78546500 |
| C | -0.01501300 | 0.35214300  | -0.67869000 |
| H | 0.06356100  | 0.39925200  | -1.77101000 |
| C | 1.35401700  | -0.02261800 | -0.12348100 |
| O | 2.32366800  | -0.07471900 | -0.86361600 |
| C | 1.46687100  | -0.35074300 | 1.35338900  |
| H | 0.83904100  | 0.29764800  | 1.97286200  |
| H | 1.11869300  | -1.37925800 | 1.52031800  |
| H | 2.51157900  | -0.28196700 | 1.66497300  |
| O | -1.58292300 | -1.67779900 | -0.17810500 |
| H | -1.01759700 | -2.15048300 | -0.80947600 |

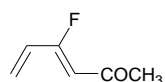**Butadiene (Product)**

|   |             |             |             |
|---|-------------|-------------|-------------|
| C | 0.81370900  | 0.34433000  | -0.05405100 |
| C | 2.26636500  | 0.18278000  | -0.10233300 |
| C | 2.93700200  | -0.95311900 | 0.13979600  |
| H | 2.80897000  | 1.09425100  | -0.34513900 |
| H | 4.01984400  | -0.98215700 | 0.06775600  |
| H | 2.43990000  | -1.87799900 | 0.42022900  |
| C | -0.14261300 | -0.60289400 | -0.08656500 |
| H | 0.18901600  | -1.63236500 | -0.17946500 |
| C | -1.61543900 | -0.45808100 | -0.01315300 |
| O | -2.29788800 | -1.47824900 | -0.04314000 |
| C | -2.26423700 | 0.90751700  | 0.09649800  |
| H | -1.91734300 | 1.43564900  | 0.99196900  |
| H | -2.00207200 | 1.53557300  | -0.76258200 |

|   |             |            |            |
|---|-------------|------------|------------|
| H | -3.34746100 | 0.77608700 | 0.14096500 |
| F | 0.46928100  | 1.66152900 | 0.01447000 |

**Transition state**

|   |             |             |             |
|---|-------------|-------------|-------------|
| C | -1.13041700 | -0.42433200 | -0.22833900 |
| C | -2.16081900 | 0.42521700  | 0.04520700  |
| C | -1.48393900 | 1.62396100  | 0.43628600  |
| H | -3.22623300 | 0.29906100  | -0.12523200 |
| H | -1.82633800 | 2.61101100  | 0.11057700  |
| H | -0.85934300 | 1.63323100  | 1.32107800  |
| C | 0.06989800  | 0.33743200  | -0.42973600 |
| H | 0.07492600  | 1.03500800  | -1.26222800 |
| C | 1.39562500  | -0.07086300 | 0.10299200  |
| O | 1.49444300  | -0.93194800 | 0.96987700  |
| C | 2.61131800  | 0.65337300  | -0.44775800 |
| H | 2.76064200  | 0.38615100  | -1.50265300 |
| H | 2.47262700  | 1.74133600  | -0.40878800 |
| H | 3.50017000  | 0.37435100  | 0.12221100  |
| F | -1.18466500 | -1.76592200 | -0.32065400 |

**Cyclobutene (Starting material)**

|   |             |             |             |
|---|-------------|-------------|-------------|
| C | -1.23737100 | -0.30863200 | -0.19218400 |
| C | -1.81988500 | 0.65694400  | 0.52046500  |
| C | -0.65968400 | 1.60712500  | 0.24456900  |
| H | -2.74788900 | 0.75708000  | 1.07053400  |
| H | -0.07386000 | 1.91207700  | 1.11940500  |
| H | -0.89277800 | 2.49015900  | -0.35951600 |
| C | 0.00097800  | 0.43632900  | -0.60919700 |
| H | 0.07532000  | 0.67329700  | -1.67535100 |
| C | 1.37275300  | -0.02365000 | -0.12403500 |
| O | 2.36859700  | 0.25830100  | -0.76790800 |
| C | 1.44764200  | -0.81592300 | 1.16519800  |
| H | 0.82642400  | -0.37067900 | 1.95117500  |
| H | 1.05974100  | -1.82876000 | 0.99158000  |
| H | 2.48576900  | -0.88349900 | 1.49744700  |
| F | -1.58978800 | -1.56991600 | -0.49787800 |

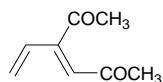**Butadiene (Product)**

|   |             |             |             |
|---|-------------|-------------|-------------|
| C | -0.66999800 | -0.28192100 | -0.18589300 |
| C | -2.00354900 | -0.90236000 | -0.33316000 |
| C | -2.38326500 | -2.06428400 | 0.21934400  |
| H | -2.72120200 | -0.33387000 | -0.92555800 |
| H | -3.37909700 | -2.46397500 | 0.04976800  |
| H | -1.72209200 | -2.64273700 | 0.85990700  |
| C | 0.46303700  | -1.01883600 | -0.14621200 |
| H | 0.37079700  | -2.09866700 | -0.24666800 |
| C | 1.88027300  | -0.59636000 | 0.01049800  |
| O | 2.72015200  | -1.47261200 | 0.19157300  |
| C | 2.29826900  | 0.85922600  | -0.08519600 |
| H | 1.97010500  | 1.30384500  | -1.03090500 |
| H | 1.86350800  | 1.45745500  | 0.72481400  |
| H | 3.38655100  | 0.91158500  | -0.01074400 |
| C | -0.74043800 | 1.23507700  | -0.12647900 |
| C | -0.95120000 | 1.85893900  | 1.23718900  |
| H | -0.22263000 | 1.48535500  | 1.96561200  |
| H | -0.89590500 | 2.94779000  | 1.16346000  |
| H | -1.94323700 | 1.57035400  | 1.61056100  |
| O | -0.72834900 | 1.88835800  | -1.15417200 |

**Transition state**

|   |             |             |             |
|---|-------------|-------------|-------------|
| C | -0.69842500 | 0.51722500  | -0.14472700 |
| C | -0.99148200 | 1.86099800  | -0.00844100 |
| C | 0.25338400  | 2.51925200  | 0.17614000  |
| H | -1.95197600 | 2.34982400  | -0.15796000 |
| H | 0.46325200  | 3.51331500  | -0.22663500 |
| H | 0.89531200  | 2.22799100  | 0.99965100  |
| C | 0.69576800  | 0.51182800  | -0.55623200 |
| H | 0.95221700  | 0.98948200  | -1.49714800 |
| C | 1.78294600  | -0.38448700 | -0.06619300 |
| O | 2.81431100  | -0.49761600 | -0.72126200 |
| C | 1.64357700  | -1.05197300 | 1.29115800  |

|   |             |             |             |
|---|-------------|-------------|-------------|
| H | 2.05990400  | -0.37721500 | 2.05220100  |
| H | 0.60612800  | -1.25238000 | 1.57327700  |
| H | 2.22802200  | -1.97545800 | 1.30970800  |
| C | -1.67200700 | -0.59915200 | -0.02529300 |
| C | -1.31436400 | -1.95656800 | -0.60206500 |
| H | -0.25341600 | -2.20382800 | -0.49942600 |
| H | -1.92846700 | -2.72795200 | -0.13117100 |
| H | -1.53682000 | -1.94824800 | -1.67786900 |
| O | -2.78062700 | -0.38966800 | 0.45492300  |

### Cyclobutene (Starting material)

|   |             |             |             |
|---|-------------|-------------|-------------|
| C | -0.69308500 | 0.57116600  | -0.14309300 |
| C | -0.53800400 | 1.88740400  | 0.10905700  |
| C | 0.88212900  | 1.93794900  | -0.40555100 |
| H | -1.20525700 | 2.64436300  | 0.51106000  |
| H | 1.65489700  | 2.19688200  | 0.32861500  |
| H | 1.04294800  | 2.54493800  | -1.30421800 |
| C | 0.71900200  | 0.39135600  | -0.71398600 |
| H | 0.76899100  | 0.15824900  | -1.78267500 |
| C | 1.70267000  | -0.52262600 | 0.00550200  |
| O | 2.49547800  | -1.19543800 | -0.63340600 |
| C | 1.66652700  | -0.57772400 | 1.52254000  |
| H | 1.43978900  | 0.39388100  | 1.97352800  |
| H | 0.87258200  | -1.26720000 | 1.83998000  |
| H | 2.61997600  | -0.95751500 | 1.89689400  |
| C | -1.85601100 | -0.33661300 | 0.01885000  |
| C | -1.73377100 | -1.73515400 | -0.55201500 |
| H | -0.89027700 | -2.27245100 | -0.09910200 |
| H | -2.65723400 | -2.28954600 | -0.37237300 |
| H | -1.53422300 | -1.69158500 | -1.63074600 |
| O | -2.87159500 | 0.05111700  | 0.58230800  |

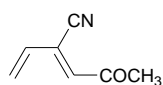

### Butadiene (Product)

|   |            |            |             |
|---|------------|------------|-------------|
| C | 0.81660900 | 0.12564400 | -0.10897600 |
|---|------------|------------|-------------|

|   |             |             |             |
|---|-------------|-------------|-------------|
| C | 2.24994500  | -0.23915400 | -0.19689700 |
| C | 2.77752300  | -1.38687700 | 0.25100300  |
| H | 2.89937100  | 0.51678100  | -0.63418000 |
| H | 3.83861300  | -1.58888700 | 0.13948600  |
| H | 2.18317400  | -2.14624500 | 0.75269100  |
| C | -0.18482400 | -0.79108500 | -0.14706800 |
| H | 0.09703700  | -1.83130500 | -0.28803600 |
| C | -1.66110800 | -0.62590300 | -0.02244100 |
| O | -2.33287800 | -1.65212900 | -0.03431500 |
| C | -2.31271100 | 0.73241400  | 0.11251700  |
| H | -1.96618900 | 1.25274900  | 1.01275500  |
| H | -2.07182700 | 1.37817400  | -0.73954800 |
| H | -3.39398300 | 0.59075500  | 0.16854900  |
| C | 0.58694500  | 1.54262900  | -0.00065600 |
| N | 0.49179200  | 2.69985800  | 0.07684400  |

**Transition state**

|   |             |             |             |
|---|-------------|-------------|-------------|
| C | -1.04754500 | 0.16755200  | -0.18192900 |
| C | -1.63599300 | 1.39945800  | 0.02442100  |
| C | -0.56724200 | 2.26861300  | 0.38232700  |
| H | -2.66812500 | 1.69315100  | -0.15448500 |
| H | -0.53879600 | 3.31871600  | 0.07985100  |
| H | 0.03360400  | 2.03429100  | 1.25381000  |
| C | 0.34467900  | 0.47283400  | -0.43874800 |
| H | 0.55838300  | 1.07552000  | -1.31628600 |
| C | 1.46554600  | -0.34851000 | 0.09812700  |
| O | 1.25732000  | -1.17753100 | 0.97483900  |
| C | 2.84811500  | -0.10083100 | -0.47177400 |
| H | 2.88554400  | -0.42942100 | -1.51916600 |
| H | 3.09098300  | 0.96934200  | -0.46205700 |
| H | 3.59281200  | -0.65423600 | 0.10401100  |
| C | -1.66358800 | -1.11898000 | -0.16262100 |
| N | -2.21097000 | -2.14684700 | -0.18331600 |

**Cyclobutene (Starting material)**

|   |             |            |             |
|---|-------------|------------|-------------|
| C | -1.05256900 | 0.37803800 | -0.07862300 |
| C | -1.04058600 | 1.59237100 | 0.50837400  |



|   |             |             |             |
|---|-------------|-------------|-------------|
| C | 0.38111800  | 1.90259800  | 0.09790700  |
| H | -1.78651800 | 2.15261200  | 1.06459500  |
| H | 1.10139300  | 2.00523600  | 0.91844200  |
| H | 0.51246800  | 2.74553700  | -0.58951100 |
| C | 0.37526500  | 0.48660900  | -0.61757100 |
| H | 0.44554900  | 0.56151400  | -1.70701000 |
| C | 1.45931600  | -0.47689700 | -0.13814500 |
| O | 2.46481200  | -0.62297000 | -0.81097900 |
| C | 1.25718800  | -1.19973800 | 1.17662200  |
| H | 0.89725300  | -0.52120100 | 1.95939700  |
| H | 0.48991300  | -1.97620700 | 1.05481400  |
| H | 2.19294100  | -1.66966000 | 1.48649700  |
| C | -2.03226000 | -0.64441700 | -0.20054600 |
| N | -2.80804700 | -1.50649200 | -0.31249900 |

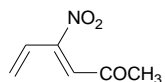

### Butadiene (Product)

|   |             |             |             |
|---|-------------|-------------|-------------|
| C | 0.77452300  | -0.18171500 | -0.11923300 |
| C | 2.16756800  | -0.64477900 | -0.19108700 |
| C | 2.59517800  | -1.80491200 | 0.32369300  |
| H | 2.86612200  | 0.02091400  | -0.68882000 |
| H | 3.62875000  | -2.11646700 | 0.20684800  |
| H | 1.94282900  | -2.47162600 | 0.88308800  |
| C | -0.32636500 | -0.94872800 | -0.17966100 |
| H | -0.16761100 | -2.01353200 | -0.34140600 |
| C | -1.78711100 | -0.55001000 | -0.17128700 |
| O | -2.38550000 | -0.58885600 | -1.23001200 |
| C | -2.46005800 | -0.30960000 | 1.15866900  |
| H | -2.55013500 | -1.26886400 | 1.68815000  |
| H | -1.87667400 | 0.36823900  | 1.78787000  |
| H | -3.46061300 | 0.09743600  | 0.99200900  |
| N | 0.60606300  | 1.28926600  | -0.01222200 |
| O | 1.62574000  | 1.97611500  | 0.01674300  |
| O | -0.54118100 | 1.73742900  | 0.04217600  |

**Transition state**

|   |             |             |             |
|---|-------------|-------------|-------------|
| C | -0.76492000 | 0.41902500  | -0.17244300 |
| C | -1.28817600 | 1.65829300  | 0.10353700  |
| C | -0.14380700 | 2.45132600  | 0.38573700  |
| H | -2.30650300 | 2.01041500  | -0.03484300 |
| H | -0.05415800 | 3.49059500  | 0.06301600  |
| H | 0.51798500  | 2.16899800  | 1.19649600  |
| C | 0.61749100  | 0.59772500  | -0.52294700 |
| H | 0.83273800  | 1.21103500  | -1.39243900 |
| C | 1.80675600  | -0.20180700 | -0.08389400 |
| O | 2.86341100  | -0.02262900 | -0.67694800 |
| C | 1.70845000  | -1.14198800 | 1.09817700  |
| H | 1.02509100  | -0.76877100 | 1.86956900  |
| H | 1.32049800  | -2.10912000 | 0.75964300  |
| H | 2.70501400  | -1.28873500 | 1.52147300  |
| N | -1.47960500 | -0.84026300 | -0.14831600 |
| O | -2.66638900 | -0.81346700 | 0.18769600  |
| O | -0.85929700 | -1.85490600 | -0.48496100 |

**Cyclobutene (Starting material)**

|   |             |             |             |
|---|-------------|-------------|-------------|
| C | -0.73435200 | 0.49690600  | -0.10685300 |
| C | -0.74686000 | 1.74398300  | 0.38383300  |
| C | 0.69594300  | 1.97840800  | -0.02101000 |
| H | -1.49803300 | 2.35510900  | 0.87125800  |
| H | 1.39504000  | 2.12961500  | 0.80932500  |
| H | 0.85831900  | 2.75969700  | -0.77080200 |
| C | 0.68405400  | 0.50463800  | -0.62223600 |
| H | 0.77826300  | 0.49253500  | -1.71184000 |
| C | 1.74743500  | -0.42981500 | -0.04341500 |
| O | 2.78885000  | -0.58561500 | -0.65489600 |
| C | 1.47871400  | -1.10306900 | 1.28415800  |
| H | 1.08567100  | -0.39496700 | 2.02429200  |
| H | 0.71627000  | -1.88092100 | 1.14585900  |
| H | 2.39632600  | -1.56255000 | 1.65749900  |
| N | -1.75984500 | -0.51819300 | -0.16036500 |
| O | -2.86926700 | -0.24131200 | 0.29936600  |
| O | -1.43990200 | -1.60025700 | -0.66320600 |

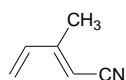

### Butadiene (Product)

|   |             |             |             |
|---|-------------|-------------|-------------|
| C | 0.38993000  | 0.34856000  | -0.08072700 |
| C | 1.84223600  | 0.12659400  | -0.20463000 |
| C | 2.51054200  | -0.95940500 | 0.21235400  |
| H | 2.40537800  | 0.95357500  | -0.63872200 |
| H | 3.58602700  | -1.04016800 | 0.08218800  |
| H | 2.01478700  | -1.78796700 | 0.71255100  |
| C | -0.48251600 | -0.68561600 | -0.17371600 |
| H | -0.12655800 | -1.69029200 | -0.38592500 |
| C | -1.89391500 | -0.54808200 | -0.02891400 |
| N | -3.05129600 | -0.46257200 | 0.08267100  |
| C | -0.04768300 | 1.77541100  | 0.12757500  |
| H | -1.13459500 | 1.87394300  | 0.17881600  |
| H | 0.38336200  | 2.17754200  | 1.05370600  |
| H | 0.31910900  | 2.40659800  | -0.69295700 |

### Transition state

|   |             |             |             |
|---|-------------|-------------|-------------|
| C | -0.67221600 | 0.54229800  | 0.11226700  |
| C | -1.79522800 | -0.23099000 | -0.06772400 |
| C | -1.32602100 | -1.57012300 | -0.24673800 |
| H | -2.84006200 | 0.06954700  | -0.00020000 |
| H | -1.85837000 | -2.43706400 | 0.15793300  |
| H | -0.68048800 | -1.80339000 | -1.08548700 |
| C | 0.32915900  | -0.42880100 | 0.51118300  |
| H | 0.18604500  | -0.96973800 | 1.44013100  |
| C | 1.69929100  | -0.33400400 | 0.09957300  |
| N | 2.80211300  | -0.28273400 | -0.27801100 |
| C | -0.44812600 | 2.01061800  | -0.09245700 |
| H | 0.31183400  | 2.17822500  | -0.86802000 |
| H | -1.36931600 | 2.50652000  | -0.41416600 |
| H | -0.08558700 | 2.50105200  | 0.81926600  |

**Cyclobutene (Starting material)**

|   |             |             |             |
|---|-------------|-------------|-------------|
| C | 0.95153600  | -0.25283000 | 0.02181700  |
| C | 1.35011200  | 0.94983400  | -0.42501500 |
| C | 0.11007900  | 1.69372900  | 0.03028600  |
| H | 2.25033400  | 1.28759400  | -0.93205400 |
| H | -0.53217800 | 2.09142700  | -0.76283300 |
| H | 0.24801900  | 2.46308400  | 0.79930000  |
| C | -0.36195600 | 0.29750100  | 0.60187600  |
| H | -0.41485900 | 0.27417400  | 1.69808200  |
| C | -1.60355300 | -0.24797400 | 0.05717400  |
| N | -2.57876500 | -0.69642400 | -0.38995500 |
| C | 1.49008100  | -1.64152900 | 0.02259700  |
| H | 0.80541400  | -2.32869300 | -0.49216000 |
| H | 2.46251300  | -1.68548000 | -0.47963000 |
| H | 1.61432200  | -2.01951500 | 1.04656600  |

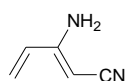**Butadiene (Product)**

|   |             |             |             |
|---|-------------|-------------|-------------|
| C | 0.37312900  | 0.34615900  | -0.08673700 |
| C | 1.83556600  | 0.18169400  | -0.20105400 |
| C | 2.52540200  | -0.88080900 | 0.23375500  |
| H | 2.36530000  | 1.01592300  | -0.66129300 |
| H | 3.60238400  | -0.93828400 | 0.10454800  |
| H | 2.04363500  | -1.71541300 | 0.73634700  |
| C | -0.48660700 | -0.71463400 | -0.19431500 |
| H | -0.11111400 | -1.69691600 | -0.45282400 |
| C | -1.88345500 | -0.55077800 | -0.03096000 |
| N | -3.02852700 | -0.36775500 | 0.11425100  |
| N | -0.05816600 | 1.64416000  | 0.05858600  |
| H | -1.04258300 | 1.80095000  | 0.24261800  |
| H | 0.56501600  | 2.30910900  | 0.49662200  |

**Transition state**

|   |             |            |            |
|---|-------------|------------|------------|
| C | -0.65986600 | 0.57356900 | 0.10507000 |
|---|-------------|------------|------------|

|   |             |             |             |
|---|-------------|-------------|-------------|
| C | -1.81568600 | -0.15469700 | -0.08632200 |
| C | -1.35070200 | -1.50082900 | -0.23950900 |
| H | -2.85010800 | 0.17038800  | -0.00824700 |
| H | -1.89402400 | -2.34489400 | 0.20117700  |
| H | -0.73114700 | -1.78389900 | -1.08344300 |
| C | 0.31602700  | -0.42611800 | 0.51474200  |
| H | 0.17464900  | -0.90404200 | 1.47843300  |
| C | 1.68438700  | -0.34495100 | 0.09245300  |
| N | 2.78235600  | -0.30398300 | -0.30229600 |
| N | -0.41018900 | 1.92131100  | -0.02398600 |
| H | -0.88771700 | 2.42354200  | -0.76104300 |
| H | 0.53821100  | 2.23575800  | 0.13848600  |

### Cyclobutene (Starting material)

|   |             |             |             |
|---|-------------|-------------|-------------|
| C | -0.92648500 | 0.35598900  | 0.01571200  |
| C | -1.46460000 | -0.80050600 | -0.42381700 |
| C | -0.29297900 | -1.65274700 | 0.03152600  |
| H | -2.40288000 | -1.05546500 | -0.90520600 |
| H | 0.30944000  | -2.11817600 | -0.75679200 |
| H | -0.48803800 | -2.39301200 | 0.81761400  |
| C | 0.32008300  | -0.30635400 | 0.59351100  |
| H | 0.37098400  | -0.27941600 | 1.68942500  |
| C | 1.60659100  | 0.12157300  | 0.04603500  |
| N | 2.61664100  | 0.48790000  | -0.39855200 |
| N | -1.28508800 | 1.68585200  | 0.11030600  |
| H | -0.51537500 | 2.34637100  | 0.08322500  |
| H | -2.05066300 | 1.97570100  | -0.48834100 |

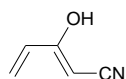

### Butadiene (Product)

|   |            |             |             |
|---|------------|-------------|-------------|
| C | 0.37809400 | 0.34208100  | -0.08381100 |
| C | 1.83014800 | 0.14909400  | -0.22198100 |
| C | 2.51039000 | -0.91108900 | 0.23498500  |
| H | 2.36590200 | 0.95565700  | -0.72601900 |
| H | 3.58250100 | -0.99591200 | 0.08313200  |

|   |             |             |             |
|---|-------------|-------------|-------------|
| H | 2.02216000  | -1.71693100 | 0.77675000  |
| C | -0.53145100 | -0.65751100 | -0.19822600 |
| H | -0.19278000 | -1.65346300 | -0.45939000 |
| C | -1.92827700 | -0.46557400 | -0.02764000 |
| N | -3.08046100 | -0.34850400 | 0.10631000  |
| O | -0.05665400 | 1.61425300  | 0.12527600  |
| H | 0.68525800  | 2.19413900  | 0.35919100  |

**Transition state**

|   |             |             |             |
|---|-------------|-------------|-------------|
| C | -0.66550200 | 0.55751700  | 0.10788300  |
| C | -1.80652600 | -0.18253300 | -0.09010700 |
| C | -1.31374900 | -1.51826100 | -0.23666600 |
| H | -2.84720400 | 0.12154300  | -0.00514500 |
| H | -1.82750500 | -2.37145600 | 0.21837800  |
| H | -0.67492800 | -1.78278900 | -1.07100200 |
| C | 0.35297800  | -0.37879800 | 0.51754000  |
| H | 0.21726500  | -0.89551700 | 1.46135600  |
| C | 1.71478600  | -0.26759000 | 0.09003300  |
| N | 2.81495000  | -0.23807000 | -0.29585400 |
| O | -0.39777800 | 1.87875900  | -0.03574300 |
| H | -1.08196800 | 2.30262400  | -0.57877500 |

**Cyclobutene (Starting material)**

|   |             |             |             |
|---|-------------|-------------|-------------|
| C | 0.92729700  | -0.36049200 | 0.02638500  |
| C | 1.45881100  | 0.78662700  | -0.42805400 |
| C | 0.27262300  | 1.61926400  | 0.03706700  |
| H | 2.38503000  | 1.05020900  | -0.92712000 |
| H | -0.33883400 | 2.07171400  | -0.75052300 |
| H | 0.47084300  | 2.36258800  | 0.81789600  |
| C | -0.32784800 | 0.26517000  | 0.60294600  |
| H | -0.38099100 | 0.23621100  | 1.69809800  |
| C | -1.61104300 | -0.15982100 | 0.04682600  |
| N | -2.63190400 | -0.48737800 | -0.40134000 |
| O | 1.23646400  | -1.67183300 | 0.07994000  |
| H | 2.07652800  | -1.83890200 | -0.37950800 |

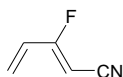

### Butadiene (Product)

|   |             |             |             |
|---|-------------|-------------|-------------|
| C | 0.38612200  | 0.31788700  | -0.04831800 |
| C | 1.84129500  | 0.23075200  | -0.12018900 |
| C | 2.56702700  | -0.86859400 | 0.13085500  |
| H | 2.33271000  | 1.16446100  | -0.38547700 |
| H | 3.64847900  | -0.85181400 | 0.03829400  |
| H | 2.11766600  | -1.80748600 | 0.44410800  |
| C | -0.52294600 | -0.67517500 | -0.12565100 |
| H | -0.17960400 | -1.69138500 | -0.28803700 |
| C | -1.92374400 | -0.46654300 | -0.01815800 |
| N | -3.07840500 | -0.33554400 | 0.06356900  |
| F | -0.05077200 | 1.58945300  | 0.09276500  |

### Transition state

|   |             |             |             |
|---|-------------|-------------|-------------|
| C | -0.65687900 | 0.55958900  | 0.09135600  |
| C | -1.81867900 | -0.12258400 | -0.11262400 |
| C | -1.36583500 | -1.47753500 | -0.21973500 |
| H | -2.84448200 | 0.22796600  | -0.05113500 |
| H | -1.89819800 | -2.30236100 | 0.26308700  |
| H | -0.72799000 | -1.77569000 | -1.04295000 |
| C | 0.34869700  | -0.36978900 | 0.52034300  |
| H | 0.20104200  | -0.88418900 | 1.46386400  |
| C | 1.71064900  | -0.28914600 | 0.08882700  |
| N | 2.81303700  | -0.27217500 | -0.28980400 |
| F | -0.41437200 | 1.87069900  | -0.09036100 |

### Cyclobutene (Starting material)

|   |             |             |             |
|---|-------------|-------------|-------------|
| C | 0.91797200  | -0.38484900 | 0.01725500  |
| C | 1.49704300  | 0.72748900  | -0.43381200 |
| C | 0.33355600  | 1.59075000  | 0.04159400  |
| H | 2.43105300  | 0.95647500  | -0.93164400 |
| H | -0.25942700 | 2.06418400  | -0.74639700 |
| H | 0.56331500  | 2.32093000  | 0.82470500  |

|   |             |             |             |
|---|-------------|-------------|-------------|
| C | -0.31884700 | 0.25685500  | 0.60630500  |
| H | -0.36790500 | 0.22889200  | 1.70122800  |
| C | -1.61693200 | -0.12010800 | 0.05053400  |
| N | -2.64896300 | -0.41351700 | -0.39474900 |
| F | 1.25543900  | -1.67741000 | 0.02489900  |

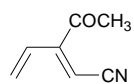

### Butadiene (Product)

|   |             |             |             |
|---|-------------|-------------|-------------|
| C | 0.50851800  | -0.14057200 | -0.07972800 |
| C | 1.97279800  | -0.29384900 | -0.11188200 |
| C | 2.64766500  | -1.35277000 | 0.36040500  |
| H | 2.51156900  | 0.56129200  | -0.51100600 |
| H | 3.73174000  | -1.39116900 | 0.30495900  |
| H | 2.15520000  | -2.19839300 | 0.83602500  |
| C | -0.30785600 | -1.22233200 | -0.18103100 |
| H | 0.14233600  | -2.20000000 | -0.34150400 |
| C | -1.73089700 | -1.24570000 | -0.14975000 |
| N | -2.89233300 | -1.34187400 | -0.13400300 |
| C | 0.01958700  | 1.29744200  | -0.02626900 |
| C | -1.32804000 | 1.63871000  | 0.56817800  |
| H | -2.12999900 | 1.41573300  | -0.14535000 |
| H | -1.53711600 | 1.06510100  | 1.47699100  |
| H | -1.34304900 | 2.70915300  | 0.78553200  |
| O | 0.75312400  | 2.16822900  | -0.46839400 |

### Transition state

|     |             |            |             |
|-----|-------------|------------|-------------|
| 0 1 |             |            |             |
| C   | -0.29652900 | 0.42549900 | -0.21127100 |
| C   | -0.41730300 | 1.79228700 | -0.03269200 |
| C   | 0.89495300  | 2.26307200 | 0.24994800  |
| H   | -1.28845500 | 2.42352300 | -0.19984500 |
| H   | 1.26366400  | 3.23078100 | -0.10019600 |
| H   | 1.42726700  | 1.86449000 | 1.10651700  |
| C   | 1.10821000  | 0.25312500 | -0.52051000 |
| H   | 1.48883400  | 0.71654400 | -1.42418200 |



|   |             |             |             |
|---|-------------|-------------|-------------|
| C | 1.93415900  | -0.80025800 | -0.01521500 |
| N | 2.67491800  | -1.58147800 | 0.43203900  |
| C | -1.29370800 | -0.66304500 | -0.06630200 |
| C | -2.71402700 | -0.27145600 | 0.29613800  |
| H | -3.08445600 | 0.53221700  | -0.35238300 |
| H | -3.36283400 | -1.14492100 | 0.20391200  |
| H | -2.75295600 | 0.09798900  | 1.32870100  |
| O | -0.96375300 | -1.83070200 | -0.22342100 |

### Cyclobutene (Starting material)

|   |             |             |             |
|---|-------------|-------------|-------------|
| C | 0.30637500  | 0.44152900  | 0.10778800  |
| C | 0.03996900  | 1.72251300  | -0.22001600 |
| C | -1.42012800 | 1.65314900  | 0.16906500  |
| H | 0.65021100  | 2.53762200  | -0.59933700 |
| H | -2.13736400 | 1.76029100  | -0.65136100 |
| H | -1.72797900 | 2.29611700  | 1.00165400  |
| C | -1.12043500 | 0.15477700  | 0.58672500  |
| H | -1.20036800 | -0.02763400 | 1.66399500  |
| C | -1.87750600 | -0.86503700 | -0.13521000 |
| N | -2.49683300 | -1.64918600 | -0.72821300 |
| C | 1.50102200  | -0.42860200 | 0.12506900  |
| C | 2.76151300  | 0.08207200  | -0.54387900 |
| H | 2.98191100  | 1.11552400  | -0.25157700 |
| H | 3.60109400  | -0.56458600 | -0.27961900 |
| H | 2.63139300  | 0.06993100  | -1.63391800 |
| O | 1.44176000  | -1.52567100 | 0.66380000  |

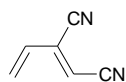

### Butadiene (Product)

|   |            |             |             |
|---|------------|-------------|-------------|
| C | 0.43025400 | 0.12114700  | -0.10296700 |
| C | 1.90008300 | 0.02868400  | -0.19981200 |
| C | 2.63011200 | -1.01138900 | 0.22728600  |
| H | 2.39563200 | 0.89890600  | -0.62479500 |
| H | 3.70954400 | -1.01608000 | 0.11054900  |
| H | 2.18778700 | -1.87230400 | 0.72238500  |

|   |             |             |             |
|---|-------------|-------------|-------------|
| C | -0.39626100 | -0.95723900 | -0.15106800 |
| H | 0.02719400  | -1.94474800 | -0.31286800 |
| C | -1.81092500 | -0.89698300 | -0.02014100 |
| N | -2.97151500 | -0.89615200 | 0.08019000  |
| C | -0.10635300 | 1.44886100  | 0.02597400  |
| N | -0.48586000 | 2.54411500  | 0.12396700  |

**Transition state**

|   |             |             |             |
|---|-------------|-------------|-------------|
| C | 0.69059100  | 0.14118300  | 0.14267100  |
| C | 1.16847800  | 1.41957800  | -0.06715300 |
| C | 0.00866600  | 2.21560400  | -0.28940900 |
| H | 2.18874200  | 1.78148800  | 0.03584500  |
| H | -0.07381100 | 3.24454500  | 0.06946700  |
| H | -0.64562800 | 1.97687700  | -1.12053500 |
| C | -0.69270400 | 0.34580400  | 0.52485700  |
| H | -0.88594000 | 0.88773600  | 1.44365900  |
| C | -1.76237500 | -0.50215000 | 0.09786700  |
| N | -2.65248700 | -1.15055400 | -0.28415900 |
| C | 1.35664500  | -1.10986300 | -0.00638900 |
| N | 1.90975000  | -2.12824300 | -0.12199800 |

**Cyclobutene (Starting material)**

|   |             |             |             |
|---|-------------|-------------|-------------|
| C | 0.69144400  | 0.37997400  | 0.01354700  |
| C | 0.40887600  | 1.62156200  | -0.42606800 |
| C | -1.02837600 | 1.59829300  | 0.04405300  |
| H | 1.00508100  | 2.37826900  | -0.92591100 |
| H | -1.78508600 | 1.61467200  | -0.74680900 |
| H | -1.29695100 | 2.32797400  | 0.81599100  |
| C | -0.70880500 | 0.15259100  | 0.60427700  |
| H | -0.72014700 | 0.09846700  | 1.69874100  |
| C | -1.50024700 | -0.94511900 | 0.05485900  |
| N | -2.13721600 | -1.80885700 | -0.38975400 |
| C | 1.84778900  | -0.44319700 | 0.00416000  |
| N | 2.78478900  | -1.13457200 | 0.01675700  |

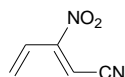

### Butadiene (Product)

|   |             |             |             |
|---|-------------|-------------|-------------|
| C | 0.45823800  | -0.17076900 | -0.08075000 |
| C | 1.89695600  | -0.42837300 | -0.14463700 |
| C | 2.47079800  | -1.56151300 | 0.28702000  |
| H | 2.50182400  | 0.37938900  | -0.54372000 |
| H | 3.54327800  | -1.70532800 | 0.19892600  |
| H | 1.90654400  | -2.36482400 | 0.75480600  |
| C | -0.50970400 | -1.10698100 | -0.18835100 |
| H | -0.18688500 | -2.12589900 | -0.38849000 |
| C | -1.91941700 | -0.93865700 | -0.11136100 |
| N | -3.08371300 | -0.94429400 | -0.08315400 |
| N | 0.07323700  | 1.26025500  | 0.05548000  |
| O | 0.88695200  | 2.09141900  | -0.34660700 |
| O | -1.02103400 | 1.51391800  | 0.54669100  |

### Transition state

|   |             |             |             |
|---|-------------|-------------|-------------|
| C | 0.40539100  | 0.39339900  | 0.15833600  |
| C | 0.72479000  | 1.71252700  | -0.03290200 |
| C | -0.53959100 | 2.33689500  | -0.23310800 |
| H | 1.68542600  | 2.20234300  | 0.09380800  |
| H | -0.77605800 | 3.32367200  | 0.17125700  |
| H | -1.16143400 | 2.02533400  | -1.06485000 |
| C | -0.98287700 | 0.34670700  | 0.53271900  |
| H | -1.26894100 | 0.83606100  | 1.45782800  |
| C | -1.93472300 | -0.60168700 | 0.04639800  |
| N | -2.77066700 | -1.29762300 | -0.37129100 |
| N | 1.27883000  | -0.75429700 | 0.00119400  |
| O | 2.46576200  | -0.52274100 | -0.23997500 |
| O | 0.77497700  | -1.87113600 | 0.12797300  |

### Cyclobutene (Starting material)

|   |            |            |             |
|---|------------|------------|-------------|
| C | 0.37709400 | 0.44197900 | 0.06366000  |
| C | 0.17550500 | 1.71990200 | -0.27807800 |

|   |             |             |             |
|---|-------------|-------------|-------------|
| C | -1.27473100 | 1.68499700  | 0.16691500  |
| H | 0.81057400  | 2.49426600  | -0.69183000 |
| H | -2.01297700 | 1.80037700  | -0.63223200 |
| H | -1.52932900 | 2.34594500  | 1.00200300  |
| C | -1.01649900 | 0.17747200  | 0.59902400  |
| H | -1.06079600 | 0.01731800  | 1.68148600  |
| C | -1.83047300 | -0.82703300 | -0.08149500 |
| N | -2.49913700 | -1.60188400 | -0.63003700 |
| N | 1.54340500  | -0.40626400 | 0.01845400  |
| O | 1.42852700  | -1.52672300 | 0.51907600  |
| O | 2.55863300  | 0.05362600  | -0.50638900 |

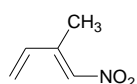

### Butadiene (Product)

|   |             |             |             |
|---|-------------|-------------|-------------|
| C | 0.77103700  | 0.40255300  | -0.11538200 |
| C | 2.17419100  | -0.04039000 | -0.24121700 |
| C | 2.69248600  | -1.15924300 | 0.28743300  |
| H | 2.83229300  | 0.64665900  | -0.77322500 |
| H | 3.74217500  | -1.40532200 | 0.15457900  |
| H | 2.09939900  | -1.84537500 | 0.88702400  |
| C | -0.19363300 | -0.54442900 | -0.16417300 |
| H | 0.00724900  | -1.59007800 | -0.35072100 |
| N | -1.60765900 | -0.30778900 | -0.00204000 |
| O | -2.02091200 | 0.83672000  | 0.22368100  |
| O | -2.33674800 | -1.30343200 | -0.10174600 |
| C | 0.55079200  | 1.88739700  | 0.04043500  |
| H | -0.19628800 | 2.26507000  | -0.66289300 |
| H | 0.16849700  | 2.11564000  | 1.04186100  |
| H | 1.49233200  | 2.42630100  | -0.10039600 |

### Transition state

|   |            |             |             |
|---|------------|-------------|-------------|
| C | 1.03353200 | 0.43348000  | -0.18159600 |
| C | 2.03824600 | -0.49140800 | 0.02160800  |
| C | 1.39814500 | -1.70477300 | 0.40790600  |
| H | 3.10116500 | -0.38102100 | -0.18832600 |

|   |             |             |             |
|---|-------------|-------------|-------------|
| H | 1.76808100  | -2.68558100 | 0.09343400  |
| H | 0.77963000  | -1.73077100 | 1.29730800  |
| C | -0.09056200 | -0.43018500 | -0.42320000 |
| H | -0.14678700 | -1.08132200 | -1.28522400 |
| N | -1.44534500 | -0.06757600 | -0.00263800 |
| O | -2.37167200 | -0.77394500 | -0.41552100 |
| O | -1.58015600 | 0.89324500  | 0.76482700  |
| C | 1.09833600  | 1.93153600  | -0.18521800 |
| H | 0.40874500  | 2.37455100  | -0.91022700 |
| H | 0.83637100  | 2.33388900  | 0.80007700  |
| H | 2.11865000  | 2.25698500  | -0.42002400 |

### Cyclobutene (Starting material)

|   |             |             |             |
|---|-------------|-------------|-------------|
| C | 1.65868300  | 0.99444500  | 0.34181100  |
| C | 1.24359000  | -0.19389900 | -0.13195200 |
| C | -0.09079200 | 0.36470100  | -0.58509500 |
| H | -0.29899400 | 0.39445100  | -1.65594600 |
| C | 0.35840200  | 1.72462100  | 0.05800500  |
| H | 2.59760100  | 1.33376300  | 0.77169100  |
| H | 0.38907600  | 2.56664200  | -0.64307500 |
| H | -0.22550300 | 2.00843400  | 0.94052100  |
| N | -1.33433800 | -0.22388300 | 0.04612700  |
| O | -1.23257200 | -0.71504800 | 1.16843100  |
| O | -2.37796600 | -0.14698100 | -0.60071700 |
| C | 1.81211100  | -1.56537500 | -0.25339700 |
| H | 2.83700100  | -1.59952100 | 0.13107400  |
| H | 1.20908600  | -2.28607100 | 0.31388800  |
| H | 1.82445000  | -1.90123400 | -1.29898300 |

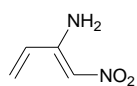

### Butadiene (Product)

|   |            |             |             |
|---|------------|-------------|-------------|
| C | 0.76392700 | 0.41624600  | -0.09314700 |
| C | 2.18637000 | 0.02785200  | -0.21383700 |
| C | 2.71697100 | -1.10997000 | 0.25024700  |
| H | 2.82829400 | 0.76129800  | -0.70188500 |

|   |             |             |             |
|---|-------------|-------------|-------------|
| H | 3.77427200  | -1.32278100 | 0.12213300  |
| H | 2.12536000  | -1.85331500 | 0.77765800  |
| C | -0.21337900 | -0.55358700 | -0.15909400 |
| H | 0.01684000  | -1.58866200 | -0.35340500 |
| N | -1.59022300 | -0.30221400 | -0.00818500 |
| O | -1.99136800 | 0.87762900  | 0.16347300  |
| O | -2.36232500 | -1.27151400 | -0.05326700 |
| N | 0.52229900  | 1.73886600  | 0.03534300  |
| H | 1.27941600  | 2.38175800  | 0.21552800  |
| H | -0.44249800 | 2.03297600  | 0.16320600  |

### Transition state

|   |             |             |             |
|---|-------------|-------------|-------------|
| C | 1.04016100  | 0.48755800  | -0.15636000 |
| C | 2.07585900  | -0.41200000 | 0.03916400  |
| C | 1.41989200  | -1.63605300 | 0.37493000  |
| H | 3.13246300  | -0.28709700 | -0.18242900 |
| H | 1.78881900  | -2.59860900 | 0.00243200  |
| H | 0.82907100  | -1.72657900 | 1.27985800  |
| C | -0.06709000 | -0.41188000 | -0.42209600 |
| H | -0.09415800 | -1.01529000 | -1.32004900 |
| N | -1.43019700 | -0.08838500 | -0.02154000 |
| O | -2.29477100 | -0.94557200 | -0.22327500 |
| O | -1.64714000 | 1.00374000  | 0.53314600  |
| N | 1.03254600  | 1.85753500  | -0.19357600 |
| H | 1.73439600  | 2.32809400  | 0.36359800  |
| H | 0.11531800  | 2.28433600  | -0.13039900 |

### Cyclobutene (Starting material)

|   |             |             |             |
|---|-------------|-------------|-------------|
| C | 1.70388700  | -0.96935000 | -0.37241200 |
| C | 1.23669700  | 0.24070300  | 0.01171500  |
| C | -0.03262600 | -0.34148200 | 0.58531600  |
| H | -0.16051900 | -0.25250800 | 1.67023100  |
| C | 0.45621500  | -1.72731900 | 0.06979300  |
| H | 2.64649500  | -1.30948300 | -0.78836300 |
| H | 0.57736000  | -2.47510500 | 0.86365400  |
| H | -0.16884000 | -2.15049800 | -0.72253800 |
| N | -1.32392800 | 0.20144900  | 0.01232400  |

|   |             |             |             |
|---|-------------|-------------|-------------|
| O | -1.38496600 | 1.42600100  | -0.12981900 |
| O | -2.22926000 | -0.58345100 | -0.24169400 |
| N | 1.67250500  | 1.54464500  | 0.08242600  |
| H | 0.92849900  | 2.23269800  | 0.02391800  |
| H | 2.46573500  | 1.77652900  | -0.50450600 |

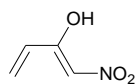

### Butadiene (Product)

|   |             |             |             |
|---|-------------|-------------|-------------|
| C | 0.76064900  | 0.40394200  | -0.10476800 |
| C | 2.17108800  | -0.00529700 | -0.25376000 |
| C | 2.71133700  | -1.10465300 | 0.28731000  |
| H | 2.79498900  | 0.67493200  | -0.83668400 |
| H | 3.75888200  | -1.34608800 | 0.13228000  |
| H | 2.13174200  | -1.78703900 | 0.90334300  |
| C | -0.23622600 | -0.51324700 | -0.18380100 |
| H | -0.02692300 | -1.54914500 | -0.40000500 |
| N | -1.63579800 | -0.25568200 | -0.00580000 |
| O | -2.03245100 | 0.89746600  | 0.18383100  |
| O | -2.37410300 | -1.25270300 | -0.05789300 |
| O | 0.52911200  | 1.72086100  | 0.06986400  |
| H | 1.37034700  | 2.18764800  | 0.20537800  |

### Transition state

|   |             |             |             |
|---|-------------|-------------|-------------|
| C | 1.00560400  | 0.48947600  | -0.20170700 |
| C | 2.08590900  | -0.33611700 | 0.02763800  |
| C | 1.50235700  | -1.57976100 | 0.40501000  |
| H | 3.13542400  | -0.15996800 | -0.19668800 |
| H | 1.92553900  | -2.53156200 | 0.06972200  |
| H | 0.87678200  | -1.65635200 | 1.28569100  |
| C | -0.09213400 | -0.40197300 | -0.44289600 |
| H | -0.12744100 | -1.02728000 | -1.32435800 |
| N | -1.44159000 | -0.08854400 | 0.01823400  |
| O | -2.37630500 | -0.66520900 | -0.55124700 |
| O | -1.56530100 | 0.67086700  | 0.98464200  |
| O | 0.89718300  | 1.83192200  | -0.29234400 |

|   |            |            |            |
|---|------------|------------|------------|
| H | 1.62579800 | 2.26457900 | 0.18131300 |
|---|------------|------------|------------|

**Cyclobutene (Starting material)**

|   |             |             |             |
|---|-------------|-------------|-------------|
| C | 1.77341700  | 0.80305100  | 0.31290200  |
| C | 1.20970500  | -0.33245300 | -0.13441500 |
| C | -0.05571200 | 0.31325600  | -0.61332100 |
| H | -0.26789000 | 0.30193100  | -1.68241800 |
| C | 0.54728900  | 1.64226500  | -0.02766000 |
| H | 2.73516700  | 1.05877100  | 0.74435700  |
| H | 0.67606100  | 2.43076200  | -0.77779400 |
| H | -0.01510300 | 2.03257700  | 0.82697400  |
| N | -1.33551200 | -0.13048200 | 0.06589000  |
| O | -1.28227400 | -0.41129900 | 1.25963300  |
| O | -2.35120600 | -0.15215400 | -0.62647500 |
| O | 1.51019400  | -1.64061500 | -0.25499300 |
| H | 2.35844900  | -1.83484000 | 0.17730100  |

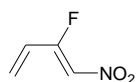**Butadiene (Product)**

|   |             |             |             |
|---|-------------|-------------|-------------|
| C | 0.76675900  | 0.38388400  | -0.07383600 |
| C | 2.19752700  | 0.09159000  | -0.16669300 |
| C | 2.77493200  | -1.06239100 | 0.19631500  |
| H | 2.79880100  | 0.91831100  | -0.53975300 |
| H | 3.84547500  | -1.20480100 | 0.08567300  |
| H | 2.21227000  | -1.88804800 | 0.62407900  |
| C | -0.22351600 | -0.52884200 | -0.13914400 |
| H | -0.00903000 | -1.57401000 | -0.30336600 |
| N | -1.63347700 | -0.26283700 | -0.00323100 |
| O | -2.03068100 | 0.89375500  | 0.14413300  |
| O | -2.36424700 | -1.26216800 | -0.04909200 |
| F | 0.51689300  | 1.69225300  | 0.05508800  |

**Transition state**

|   |            |            |             |
|---|------------|------------|-------------|
| C | 0.99227700 | 0.49521700 | -0.18760000 |
|---|------------|------------|-------------|



|   |             |             |             |
|---|-------------|-------------|-------------|
| C | 2.10385100  | -0.26610500 | 0.04508600  |
| C | 1.56295400  | -1.53530900 | 0.40698100  |
| H | 3.14392800  | -0.03709200 | -0.16774800 |
| H | 2.00834900  | -2.46892600 | 0.05261000  |
| H | 0.93943600  | -1.63645300 | 1.28624600  |
| C | -0.08565700 | -0.40525700 | -0.43707100 |
| H | -0.10176400 | -1.05723200 | -1.29967700 |
| N | -1.44141300 | -0.10872700 | 0.01753800  |
| O | -2.35631300 | -0.76251900 | -0.49409200 |
| O | -1.57997500 | 0.73355200  | 0.90885000  |
| F | 0.90552200  | 1.82902800  | -0.25295900 |

### Cyclobutene (Starting material)

|   |             |             |             |
|---|-------------|-------------|-------------|
| C | 1.79492400  | 0.76003200  | 0.33512600  |
| C | 1.20736300  | -0.34342500 | -0.12940900 |
| C | -0.05192100 | 0.30315700  | -0.61216300 |
| H | -0.25969300 | 0.31108700  | -1.68202500 |
| C | 0.57676900  | 1.61539500  | -0.00733700 |
| H | 2.75965700  | 0.99124500  | 0.76947800  |
| H | 0.72735300  | 2.40670000  | -0.74887200 |
| H | 0.02112600  | 2.00438200  | 0.85119200  |
| N | -1.34028500 | -0.12282900 | 0.06152300  |
| O | -1.28501400 | -0.45204800 | 1.24229900  |
| O | -2.35955800 | -0.07936900 | -0.62305000 |
| F | 1.56970300  | -1.62369300 | -0.23241500 |

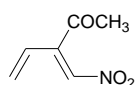

### Butadiene (Product)

|   |             |             |             |
|---|-------------|-------------|-------------|
| C | 0.62664600  | -0.28808000 | -0.13976200 |
| C | 1.94359600  | -0.93964300 | -0.23689500 |
| C | 2.27913100  | -2.08874400 | 0.36894700  |
| H | 2.68264900  | -0.39667300 | -0.82438200 |
| H | 3.27360900  | -2.50970600 | 0.25266000  |
| H | 1.58802800  | -2.62927100 | 1.01113000  |
| C | -0.50507400 | -1.01448000 | -0.14087400 |

|   |             |             |             |
|---|-------------|-------------|-------------|
| H | -0.54545300 | -2.09022600 | -0.24963500 |
| N | -1.82302700 | -0.42683200 | -0.03722100 |
| O | -1.92708400 | 0.80494800  | 0.00860800  |
| O | -2.77244100 | -1.21447000 | -0.00357300 |
| C | 0.68978200  | 1.23902900  | -0.15101100 |
| C | 0.60543300  | 1.96749400  | 1.16655000  |
| H | 1.52177900  | 1.76349600  | 1.73854700  |
| H | 0.53152800  | 3.04213000  | 0.98320300  |
| H | -0.24645000 | 1.62753700  | 1.76133300  |
| O | 0.96432700  | 1.77540800  | -1.20679100 |

**Transition state**

|   |             |             |             |
|---|-------------|-------------|-------------|
| C | -0.62644600 | 0.52613000  | -0.13506400 |
| C | -0.88442400 | 1.88398200  | -0.05592000 |
| C | 0.35606400  | 2.51410900  | 0.21873500  |
| H | -1.81525800 | 2.39274600  | -0.29395700 |
| H | 0.61425700  | 3.50074900  | -0.17423000 |
| H | 0.93016200  | 2.21024400  | 1.08674000  |
| C | 0.77057000  | 0.51104900  | -0.46834500 |
| H | 1.15889700  | 0.90431800  | -1.39809800 |
| N | 1.69080500  | -0.48982400 | 0.07468900  |
| O | 2.77516100  | -0.62875700 | -0.49996700 |
| O | 1.34430700  | -1.09751200 | 1.09400900  |
| C | -1.64878000 | -0.56300800 | -0.05063900 |
| C | -1.26681600 | -1.99281800 | -0.35901100 |
| H | -0.61051000 | -2.06182300 | -1.23429500 |
| H | -0.72141000 | -2.41838300 | 0.49095300  |
| H | -2.17563100 | -2.57404800 | -0.52986300 |
| O | -2.79661200 | -0.24894400 | 0.23488200  |

**Cyclobutene (Starting material)**

|   |             |            |             |
|---|-------------|------------|-------------|
| C | 0.47536700  | 1.89260600 | 0.18157500  |
| C | 0.66100800  | 0.59096900 | -0.11796700 |
| C | -0.76447600 | 0.40573900 | -0.60074000 |
| H | -0.93118400 | 0.20264200 | -1.65937800 |
| C | -1.00005500 | 1.89595100 | -0.15912700 |
| H | 1.14900400  | 2.67032200 | 0.52731500  |

|   |             |             |             |
|---|-------------|-------------|-------------|
| H | -1.32901100 | 2.56489200  | -0.96210000 |
| H | -1.67513400 | 2.00143300  | 0.69745600  |
| N | -1.63612500 | -0.58194700 | 0.14175500  |
| O | -1.29472200 | -0.91807100 | 1.27349500  |
| O | -2.65340200 | -0.95915000 | -0.43600600 |
| C | 1.85833600  | -0.28757600 | -0.05512200 |
| C | 1.68598800  | -1.73837600 | -0.44583600 |
| H | 1.24378500  | -1.82687900 | -1.44696500 |
| H | 2.65400100  | -2.24318900 | -0.42728800 |
| H | 1.00172500  | -2.23282000 | 0.25590400  |
| O | 2.92845900  | 0.17489100  | 0.31327000  |

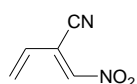

### Butadiene (Product)

|   |             |             |             |
|---|-------------|-------------|-------------|
| C | 0.74067900  | 0.09951900  | -0.11632800 |
| C | 2.13905200  | -0.37151300 | -0.22564200 |
| C | 2.58926100  | -1.53599800 | 0.26166000  |
| H | 2.82600400  | 0.32133700  | -0.70634300 |
| H | 3.63007600  | -1.82026600 | 0.13985100  |
| H | 1.95379900  | -2.22401600 | 0.81339700  |
| C | -0.29638100 | -0.76457800 | -0.15773900 |
| H | -0.17531000 | -1.82624800 | -0.31955800 |
| N | -1.68798200 | -0.38902700 | -0.00348900 |
| O | -1.97815200 | 0.79832100  | 0.13924700  |
| O | -2.49335600 | -1.32596400 | -0.03155100 |
| C | 0.60067500  | 1.52475200  | 0.00765100  |
| N | 0.67338000  | 2.68291900  | 0.08827100  |

### Transition state

|   |             |            |             |
|---|-------------|------------|-------------|
| C | -0.95246100 | 0.18544300 | -0.15436500 |
| C | -1.51031300 | 1.43951900 | 0.03579400  |
| C | -0.43100400 | 2.29360000 | 0.37969700  |
| H | -2.53016100 | 1.75291100 | -0.17431400 |
| H | -0.38913900 | 3.33824800 | 0.06280300  |
| H | 0.18578700  | 2.05678500 | 1.23913300  |

|   |             |             |             |
|---|-------------|-------------|-------------|
| C | 0.41610500  | 0.49511600  | -0.45095500 |
| H | 0.70348500  | 1.04228500  | -1.33825700 |
| N | 1.51167900  | -0.36434900 | 0.00328000  |
| O | 2.62989800  | -0.12499900 | -0.46084300 |
| O | 1.24944000  | -1.23585600 | 0.83458600  |
| C | -1.59263000 | -1.08820900 | -0.12775600 |
| N | -2.16637300 | -2.10082400 | -0.12810800 |

### Cyclobutene (Starting material)

|   |             |             |             |
|---|-------------|-------------|-------------|
| C | 0.95198700  | 1.65187300  | 0.34577500  |
| C | 1.01308700  | 0.37388700  | -0.07938900 |
| C | -0.40876700 | 0.37558300  | -0.60360600 |
| H | -0.55382000 | 0.26517000  | -1.67800900 |
| C | -0.50207900 | 1.83870400  | -0.03592700 |
| H | 1.68644600  | 2.32031600  | 0.78361700  |
| H | -0.72222000 | 2.60442600  | -0.78730500 |
| H | -1.19437100 | 1.94374300  | 0.80606900  |
| N | -1.37913300 | -0.58302800 | 0.05151200  |
| O | -1.15386000 | -0.92390200 | 1.20826500  |
| O | -2.35142300 | -0.91736800 | -0.62054600 |
| C | 2.03051300  | -0.61606300 | -0.12092700 |
| N | 2.85310200  | -1.43802900 | -0.17460900 |

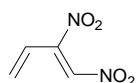

### Butadiene (Product)

|   |             |             |             |
|---|-------------|-------------|-------------|
| C | 0.49425400  | 0.11407000  | 0.02485900  |
| C | 0.50163100  | 1.53220600  | 0.37614400  |
| C | -0.30328400 | 2.48392000  | -0.12155500 |
| H | 1.28524800  | 1.80862400  | 1.07532600  |
| H | -0.19135900 | 3.50827000  | 0.22236100  |
| H | -1.06004300 | 2.28648700  | -0.86965100 |
| C | -0.48125000 | -0.79031200 | -0.16076400 |
| N | 1.88006200  | -0.50098800 | -0.04757000 |
| N | -1.90202400 | -0.52206800 | -0.00962300 |
| H | -0.26850600 | -1.83797900 | -0.32451200 |

|   |             |             |             |
|---|-------------|-------------|-------------|
| O | 1.97937300  | -1.68447200 | -0.35670400 |
| O | 2.82197000  | 0.24391200  | 0.20095100  |
| O | -2.39444000 | 0.46701100  | -0.55050700 |
| O | -2.51686800 | -1.35686500 | 0.65434900  |

### Transition state

|   |             |             |             |
|---|-------------|-------------|-------------|
| C | -0.69825000 | 0.39272100  | -0.17649700 |
| C | -1.23040800 | 1.65455200  | -0.06031700 |
| C | -0.11888500 | 2.48786200  | 0.22065000  |
| H | -2.23810900 | 1.98081900  | -0.30071900 |
| H | -0.03371700 | 3.50213700  | -0.17439400 |
| H | 0.51026000  | 2.26917900  | 1.07569400  |
| C | 0.67684000  | 0.56118300  | -0.49284400 |
| H | 1.01328000  | 1.02538800  | -1.40946800 |
| N | 1.71606100  | -0.29412100 | 0.09012500  |
| O | 2.75508300  | -0.42192200 | -0.56029200 |
| O | 1.49643200  | -0.77038400 | 1.20422800  |
| N | -1.41351500 | -0.87253800 | -0.09542400 |
| O | -0.80735500 | -1.88800200 | -0.43240700 |
| O | -2.58732500 | -0.81829300 | 0.27597500  |

### Cyclobutene (Starting material)

|   |             |             |             |
|---|-------------|-------------|-------------|
| C | 0.66478300  | 1.77897000  | 0.18369500  |
| C | 0.69844000  | 0.47810000  | -0.13068900 |
| C | -0.71040000 | 0.38703600  | -0.62931600 |
| H | -0.87654200 | 0.16162900  | -1.68157600 |
| C | -0.79917100 | 1.90462600  | -0.20634200 |
| H | 1.40172900  | 2.48346800  | 0.55117100  |
| H | -1.02357600 | 2.58814600  | -1.03129700 |
| H | -1.48219900 | 2.09087200  | 0.62832300  |
| N | -1.64741600 | -0.50474100 | 0.15439900  |
| O | -1.40360000 | -0.67741200 | 1.34452100  |
| O | -2.61142700 | -0.95391000 | -0.45674000 |
| N | 1.74353300  | -0.51489400 | -0.09168900 |
| O | 1.45803900  | -1.62661900 | -0.54113300 |
| O | 2.83022100  | -0.17694200 | 0.37714300  |

### 6.3.2 1,3-Disubstituted butadienes

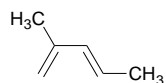

#### Butadiene (Product)

|   |             |             |             |
|---|-------------|-------------|-------------|
| C | -0.30243400 | -0.35975300 | -0.23406900 |
| C | 1.09605400  | 0.08694000  | -0.05847900 |
| C | 1.45603800  | 1.38227700  | -0.09186700 |
| H | 2.48767700  | 1.68823100  | 0.06443300  |
| H | 0.73587200  | 2.17194200  | -0.28891600 |
| C | -1.39800100 | 0.27926000  | 0.20773500  |
| H | -1.27404400 | 1.20608000  | 0.76989100  |
| C | -2.80974900 | -0.18925000 | 0.00147300  |
| H | -3.32662300 | -0.33080700 | 0.96080900  |
| H | -3.39357600 | 0.55235700  | -0.56204400 |
| H | -2.84533500 | -1.13628000 | -0.54887400 |
| H | -0.43269400 | -1.31840700 | -0.74268400 |
| C | 2.11337100  | -1.01556900 | 0.13914500  |
| H | 1.88866300  | -1.60460100 | 1.03863900  |
| H | 2.10002200  | -1.71524100 | -0.70823600 |
| H | 3.12835900  | -0.61670200 | 0.23335300  |

#### Transition state

|   |             |             |             |
|---|-------------|-------------|-------------|
| C | -0.09057800 | -0.84282300 | -0.07313100 |
| C | 1.02040700  | -0.02273200 | -0.08818700 |
| C | 0.47164400  | 1.30045700  | -0.12382700 |
| H | 0.95994400  | 2.14394400  | 0.38068700  |
| H | -0.13872000 | 1.59649800  | -0.96991200 |
| C | -1.16858400 | -0.02009800 | 0.38402800  |
| H | -0.18505600 | -1.87214400 | -0.42361000 |
| H | -1.07097300 | 0.40681000  | 1.37756800  |
| C | -2.58860500 | -0.12267800 | -0.11596300 |
| H | -3.14506100 | -0.88375800 | 0.45477800  |
| H | -3.12440100 | 0.82450100  | 0.01947100  |
| H | -2.63754300 | -0.39530900 | -1.17590800 |
| C | 2.47904800  | -0.36930700 | 0.03474700  |

|   |            |             |             |
|---|------------|-------------|-------------|
| H | 2.91882400 | 0.13170900  | 0.90970800  |
| H | 2.62696900 | -1.44728300 | 0.16089500  |
| H | 3.05602600 | -0.04188600 | -0.83967500 |

### Cyclobutene (Starting material)

|   |             |             |             |
|---|-------------|-------------|-------------|
| C | -0.05411600 | -1.00327100 | -0.27635800 |
| C | -0.97988900 | -0.05952000 | -0.02568900 |
| C | 0.00832900  | 1.09118600  | -0.17460800 |
| H | 0.19955000  | 1.67329100  | 0.73743700  |
| H | -0.18982800 | 1.79039100  | -0.99880100 |
| C | 1.08808600  | -0.01601800 | -0.47521200 |
| H | -0.09442800 | -2.09063000 | -0.32621500 |
| H | 1.45138200  | 0.03105500  | -1.51232900 |
| C | 2.27598100  | -0.09824300 | 0.48242300  |
| H | 2.86121200  | -1.01053200 | 0.30834700  |
| H | 2.94909200  | 0.75960700  | 0.35366200  |
| H | 1.93692000  | -0.11247500 | 1.52628200  |
| C | -2.44169900 | -0.06113200 | 0.27634100  |
| H | -3.00284000 | 0.50293600  | -0.48210500 |
| H | -2.84328000 | -1.08050800 | 0.30903600  |
| H | -2.64792700 | 0.41884800  | 1.24330600  |

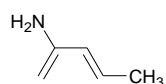

### Butadiene (Product)

|   |             |             |             |
|---|-------------|-------------|-------------|
| C | -0.29218200 | -0.36892500 | -0.25611900 |
| C | 1.11286500  | 0.04533500  | -0.05721700 |
| C | 1.51850800  | 1.33290900  | -0.07831500 |
| H | 2.55424200  | 1.60857700  | 0.10585500  |
| H | 0.82868000  | 2.12955500  | -0.33056500 |
| C | -1.36386900 | 0.27447200  | 0.23195400  |
| H | -1.20577400 | 1.16162100  | 0.84642700  |
| C | -2.79016000 | -0.13158900 | -0.00237400 |
| H | -3.31409700 | -0.30784400 | 0.94718000  |
| H | -3.34435700 | 0.66224100  | -0.52273400 |
| H | -2.85840700 | -1.04327800 | -0.60634500 |

|   |             |             |             |
|---|-------------|-------------|-------------|
| H | -0.43461600 | -1.28393800 | -0.83475200 |
| N | 2.00547900  | -1.03735800 | 0.05985300  |
| H | 2.95309400  | -0.77648000 | 0.31073900  |
| H | 1.67191100  | -1.80216100 | 0.63764800  |

**Transition state**

|   |             |             |             |
|---|-------------|-------------|-------------|
| C | -0.07768300 | -0.87317500 | -0.07736200 |
| C | 1.03072500  | -0.04599500 | -0.08435400 |
| C | 0.50629700  | 1.28960300  | -0.08963800 |
| H | 1.02753400  | 2.10520600  | 0.42996300  |
| H | -0.06489700 | 1.61580800  | -0.95231600 |
| C | -1.13171800 | -0.02858400 | 0.39948900  |
| H | -0.18346200 | -1.88556500 | -0.46525000 |
| H | -1.05286800 | 0.36847900  | 1.40744100  |
| C | -2.54498800 | -0.08196000 | -0.12903400 |
| H | -3.13283400 | -0.83253400 | 0.42374100  |
| H | -3.05535500 | 0.87899600  | 0.00781700  |
| H | -2.57981000 | -0.34219100 | -1.19257400 |
| N | 2.38024500  | -0.38750200 | -0.04457700 |
| H | 3.03587300  | 0.38363800  | -0.04073300 |
| H | 2.64831300  | -1.13866300 | 0.57934300  |

**Cyclobutene (Starting material)**

|   |             |             |             |
|---|-------------|-------------|-------------|
| C | 0.07345400  | -1.02975900 | 0.26515300  |
| C | 0.99730800  | -0.07614600 | 0.01626300  |
| C | 0.03472900  | 1.08029600  | 0.18006600  |
| H | -0.15546000 | 1.66558400  | -0.72927700 |
| H | 0.24621600  | 1.77051000  | 1.00874500  |
| C | -1.05117200 | -0.02335800 | 0.48090400  |
| H | 0.09817400  | -2.11611100 | 0.29441400  |
| H | -1.41318100 | 0.02968500  | 1.51893000  |
| C | -2.24507000 | -0.07012400 | -0.47284900 |
| H | -2.84164700 | -0.97685400 | -0.30810100 |
| H | -2.90654300 | 0.79499100  | -0.32849700 |
| H | -1.91005900 | -0.07671400 | -1.51810700 |
| N | 2.33191800  | -0.04034200 | -0.35629500 |
| H | 2.84013500  | 0.79180200  | -0.08032500 |



|   |            |             |             |
|---|------------|-------------|-------------|
| H | 2.86343400 | -0.88595700 | -0.18093700 |
|---|------------|-------------|-------------|

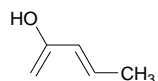

### Butadiene (Product)

|   |             |             |             |
|---|-------------|-------------|-------------|
| C | -0.28134500 | -0.35941200 | -0.26978900 |
| C | 1.12313000  | 0.03431600  | -0.05609000 |
| C | 1.59693400  | 1.28931200  | -0.08687200 |
| H | 2.64462000  | 1.49342100  | 0.10846200  |
| H | 0.94536000  | 2.11691100  | -0.33950600 |
| C | -1.34492700 | 0.28159600  | 0.24010300  |
| H | -1.17102600 | 1.14536200  | 0.88281100  |
| C | -2.77667800 | -0.09278400 | -0.00732000 |
| H | -2.86099700 | -0.98387300 | -0.63901400 |
| H | -3.30294700 | -0.28760500 | 0.93697000  |
| H | -3.31540400 | 0.72700600  | -0.50254400 |
| H | -0.43789100 | -1.24834200 | -0.88673100 |
| O | 2.00913500  | -1.00994000 | 0.13801100  |
| H | 1.52251400  | -1.80153500 | 0.41527400  |

### Transition state

|   |             |             |             |
|---|-------------|-------------|-------------|
| C | -0.07093900 | -0.89174700 | -0.03654800 |
| C | 1.02903900  | -0.06913800 | -0.06674600 |
| C | 0.55321800  | 1.27839200  | -0.09329500 |
| H | 1.08877400  | 2.08160000  | 0.42814000  |
| H | -0.02216600 | 1.61158800  | -0.95011900 |
| C | -1.12018300 | -0.01949300 | 0.40183600  |
| H | -0.17569900 | -1.91627100 | -0.38682900 |
| H | -1.04140400 | 0.40407500  | 1.39824100  |
| C | -2.52082800 | -0.05435500 | -0.15492200 |
| H | -3.10245100 | -0.84737200 | 0.34271000  |
| H | -3.04865000 | 0.88826000  | 0.02982600  |
| H | -2.53488400 | -0.25663800 | -1.23139900 |
| O | 2.33777700  | -0.45989600 | 0.04329400  |
| H | 2.91242500  | 0.25197100  | -0.27887400 |

### Cyclobutene (Starting material)

|   |             |             |             |
|---|-------------|-------------|-------------|
| C | 0.08663200  | -1.04648300 | 0.23713900  |
| C | 1.00018600  | -0.09176600 | 0.00304100  |
| C | 0.06581500  | 1.08128400  | 0.19175900  |
| H | -0.13220000 | 1.68774400  | -0.70233000 |
| H | 0.28888300  | 1.74802600  | 1.03580400  |
| C | -1.02343100 | -0.02634300 | 0.47845400  |
| H | 0.11037400  | -2.13084100 | 0.26221500  |
| H | -1.36743200 | 0.01242100  | 1.52223300  |
| C | -2.22660900 | -0.04797700 | -0.46292900 |
| H | -2.82789900 | -0.95262500 | -0.30649200 |
| H | -2.87881200 | 0.81968100  | -0.29679800 |
| H | -1.90310800 | -0.04020300 | -1.51168400 |
| O | 2.32878500  | -0.13944100 | -0.28299600 |
| H | 2.66435400  | 0.75904000  | -0.42375900 |

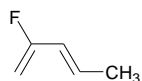

### Butadiene (Product)

|   |             |             |             |
|---|-------------|-------------|-------------|
| C | -0.28921800 | -0.40306300 | -0.17191300 |
| C | 1.10438800  | 0.02326600  | -0.04107700 |
| C | 1.64345400  | 1.24389200  | -0.08305500 |
| H | 2.70890900  | 1.38796200  | 0.05727000  |
| H | 1.02166000  | 2.11191300  | -0.26792000 |
| C | -1.35810000 | 0.33645700  | 0.16460100  |
| H | -1.20042800 | 1.32311000  | 0.60193000  |
| C | -2.78386700 | -0.09518600 | -0.00888500 |
| H | -3.31819400 | -0.08311800 | 0.95082000  |
| H | -3.32331900 | 0.59090500  | -0.67666000 |
| H | -2.85342300 | -1.10416900 | -0.42919000 |
| H | -0.42550300 | -1.41131700 | -0.56199800 |
| F | 1.94337200  | -1.04972000 | 0.12974700  |

### Transition state

|   |             |             |             |
|---|-------------|-------------|-------------|
| C | -0.05099600 | -0.90198100 | -0.02394800 |
| C | 1.01871200  | -0.05267600 | -0.07687200 |

|   |             |             |             |
|---|-------------|-------------|-------------|
| C | 0.57010000  | 1.29003800  | -0.10247900 |
| H | 1.12081800  | 2.08463000  | 0.40864800  |
| H | -0.03675400 | 1.62289400  | -0.93701200 |
| C | -1.10110400 | -0.02747700 | 0.41300600  |
| H | -0.14766100 | -1.92563700 | -0.37714100 |
| H | -1.01227500 | 0.39956200  | 1.40639200  |
| C | -2.49573300 | -0.05439600 | -0.15494000 |
| H | -3.03667700 | -0.93236000 | 0.23413000  |
| H | -3.06873300 | 0.83220400  | 0.13668300  |
| H | -2.49652700 | -0.12853800 | -1.24806400 |
| F | 2.33688100  | -0.38597900 | 0.00530700  |

### Cyclobutene (Starting material)

|   |             |             |             |
|---|-------------|-------------|-------------|
| C | 0.11960900  | -1.03746600 | 0.25446300  |
| C | 0.99271700  | -0.06154800 | 0.00028100  |
| C | 0.06685500  | 1.10552000  | 0.17016300  |
| H | -0.13969600 | 1.69135400  | -0.73335500 |
| H | 0.29200500  | 1.78496300  | 1.00081800  |
| C | -1.00273100 | -0.01910400 | 0.48229700  |
| H | 0.16175100  | -2.11999500 | 0.29549100  |
| H | -1.33525000 | 0.02520200  | 1.52815800  |
| C | -2.20629000 | -0.08282300 | -0.45506000 |
| H | -2.79274200 | -0.99302600 | -0.27790700 |
| H | -2.87026300 | 0.77787600  | -0.30452900 |
| H | -1.88586000 | -0.08982900 | -1.50442500 |
| F | 2.30545500  | -0.05600200 | -0.30190200 |

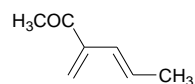

### Butadiene (Product)

|   |             |             |             |
|---|-------------|-------------|-------------|
| C | -0.96741000 | -0.22167200 | -0.20589600 |
| C | 0.34353900  | 0.44943600  | -0.11216800 |
| C | 0.50834100  | 1.78724900  | -0.16706600 |
| H | 1.48066400  | 2.25791100  | -0.06837000 |
| H | -0.33426000 | 2.45499400  | -0.32445700 |
| C | -2.13797800 | 0.30114300  | 0.19260200  |

|   |             |             |             |
|---|-------------|-------------|-------------|
| H | -2.15305600 | 1.29200000  | 0.65074900  |
| C | -3.46582300 | -0.38927300 | 0.07750000  |
| H | -3.94036000 | -0.50070900 | 1.06227500  |
| H | -4.16175400 | 0.19475100  | -0.54125600 |
| H | -3.36595700 | -1.38430700 | -0.36924800 |
| H | -0.94063000 | -1.23737600 | -0.59474900 |
| C | 1.53768900  | -0.46404700 | 0.00554600  |
| C | 2.92537000  | 0.12586600  | 0.20299700  |
| H | 3.63721400  | -0.69540000 | 0.30719100  |
| H | 3.21736400  | 0.74486400  | -0.65378800 |
| H | 2.96783900  | 0.75781300  | 1.09784800  |
| O | 1.39132200  | -1.67709400 | -0.06591100 |

**Transition state**

|   |             |             |             |
|---|-------------|-------------|-------------|
| C | -0.73933800 | -0.75397500 | -0.12556500 |
| C | 0.27099200  | 0.20124900  | -0.16792600 |
| C | -0.43873800 | 1.44559300  | -0.18393100 |
| H | -0.07825900 | 2.32629300  | 0.35314400  |
| H | -1.08948300 | 1.66121000  | -1.02369300 |
| C | -1.87672800 | -0.05993400 | 0.37817800  |
| H | -0.74515200 | -1.77096300 | -0.51891800 |
| H | -1.76450500 | 0.39806100  | 1.35756700  |
| C | -3.30231800 | -0.32162100 | -0.03744900 |
| H | -3.77582500 | -1.04950300 | 0.63945500  |
| H | -3.90033800 | 0.59560300  | 0.02172800  |
| H | -3.37275500 | -0.70852800 | -1.05935100 |
| C | 1.73312000  | 0.05660100  | -0.01262600 |
| C | 2.30949600  | -1.34926100 | 0.01951000  |
| H | 1.85169600  | -1.99109600 | -0.74285300 |
| H | 3.38975400  | -1.30196000 | -0.13632500 |
| H | 2.11335100  | -1.81114900 | 0.99579200  |
| O | 2.45407600  | 1.04251600  | 0.11153800  |

**Cyclobutene (Starting material)**

|   |             |             |             |
|---|-------------|-------------|-------------|
| C | 0.63512500  | -0.96601700 | -0.31846200 |
| C | -0.22746700 | 0.05795900  | -0.13353400 |
| C | 0.84793600  | 1.12793000  | -0.22458700 |

|   |             |             |             |
|---|-------------|-------------|-------------|
| H | 1.01840400  | 1.69702600  | 0.69644600  |
| H | 0.74930700  | 1.83026400  | -1.05992700 |
| C | 1.85316900  | -0.06643100 | -0.45137600 |
| H | 0.51905300  | -2.04766300 | -0.36089900 |
| H | 2.27245800  | -0.06951100 | -1.46768000 |
| C | 2.97514100  | -0.24011200 | 0.57212700  |
| H | 3.49830000  | -1.19402900 | 0.42927900  |
| H | 3.71410200  | 0.56525000  | 0.47793200  |
| H | 2.58066400  | -0.22113700 | 1.59563000  |
| C | -1.68501500 | 0.16142500  | 0.07000200  |
| C | -2.49323900 | -1.12414500 | 0.10916000  |
| H | -2.12759900 | -1.78892800 | 0.90161600  |
| H | -3.54446200 | -0.88778000 | 0.28846000  |
| H | -2.39916900 | -1.66665600 | -0.83993400 |
| O | -2.21437000 | 1.25993900  | 0.19988700  |

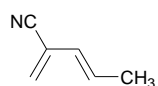

### Butadiene (Product)

|   |             |             |             |
|---|-------------|-------------|-------------|
| C | -0.52796400 | -0.29338200 | -0.25425200 |
| C | 0.77537400  | 0.38661100  | -0.08649600 |
| C | 0.96472200  | 1.72190000  | -0.06254600 |
| H | 1.94771400  | 2.15331800  | 0.09507200  |
| H | 0.13299600  | 2.40351800  | -0.21140300 |
| C | -1.69683900 | 0.17279400  | 0.21231900  |
| H | -1.70329200 | 1.09910300  | 0.78860000  |
| C | -3.02366900 | -0.49955300 | 0.01954500  |
| H | -3.48920300 | -0.73330000 | 0.98654500  |
| H | -3.72236600 | 0.15924900  | -0.51437800 |
| H | -2.92858100 | -1.42954200 | -0.55075900 |
| H | -0.50012400 | -1.25043900 | -0.77427700 |
| C | 1.92164300  | -0.48066400 | 0.04212000  |
| N | 2.82617900  | -1.20687800 | 0.13663700  |

### Transition state

|   |             |             |             |
|---|-------------|-------------|-------------|
| C | -0.35583800 | -0.81789400 | -0.10574300 |
| C | 0.69718800  | 0.08378300  | -0.11571100 |
| C | 0.06574300  | 1.37155000  | -0.13037700 |
| H | 0.47685200  | 2.22867800  | 0.40941300  |
| H | -0.55210000 | 1.62833400  | -0.98267600 |
| C | -1.46432100 | -0.06385600 | 0.38044500  |
| H | -0.38969500 | -1.83084700 | -0.50379100 |
| H | -1.35256600 | 0.36759700  | 1.37139700  |
| C | -2.88792300 | -0.23937600 | -0.07892700 |
| H | -3.40290000 | -0.98301700 | 0.54872400  |
| H | -3.44851100 | 0.69726900  | 0.02190600  |
| H | -2.95242100 | -0.56832500 | -1.12102000 |
| C | 2.09779100  | -0.16776500 | -0.00419200 |
| N | 3.24364400  | -0.36262000 | 0.08329700  |

#### Cyclobutene (Starting material)

|   |             |             |             |
|---|-------------|-------------|-------------|
| C | 0.26725100  | -0.99426100 | -0.31923000 |
| C | -0.65787500 | -0.03651200 | -0.10432700 |
| C | 0.34258800  | 1.11146600  | -0.18771100 |
| H | 0.48533100  | 1.66984800  | 0.74433200  |
| H | 0.18324400  | 1.81682700  | -1.01101600 |
| C | 1.41907500  | -0.01111000 | -0.44919000 |
| H | 0.21007500  | -2.07809800 | -0.37984000 |
| H | 1.82186800  | 0.03515100  | -1.47057100 |
| C | 2.56290500  | -0.12565900 | 0.55764000  |
| H | 3.14508400  | -1.03984600 | 0.38895000  |
| H | 3.24585300  | 0.72797500  | 0.46824700  |
| H | 2.18222400  | -0.15248000 | 1.58593000  |
| C | -2.06287400 | -0.05857600 | 0.11055000  |
| N | -3.21430000 | -0.04163800 | 0.28965300  |

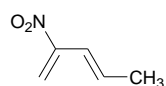

**Butadiene (Product)**

|   |             |             |             |
|---|-------------|-------------|-------------|
| C | -0.87709900 | -0.20169100 | -0.26246200 |
| C | 0.40990800  | 0.48634900  | -0.12234800 |
| C | 0.64662500  | 1.80392200  | -0.13260200 |
| H | 1.64491400  | 2.19752000  | 0.01489000  |
| H | -0.16899200 | 2.49926100  | -0.29867600 |
| C | -2.03168200 | 0.28109900  | 0.22413100  |
| H | -2.01864200 | 1.20704400  | 0.80121500  |
| C | -3.36938600 | -0.37379200 | 0.05113400  |
| H | -3.82370700 | -0.59834900 | 1.02560200  |
| H | -4.06688400 | 0.29314900  | -0.47425400 |
| H | -3.29405600 | -1.30642700 | -0.51743100 |
| H | -0.86196800 | -1.15674200 | -0.77997600 |
| N | 1.59700000  | -0.41190500 | 0.03360300  |
| O | 2.70618300  | 0.09637200  | 0.18731800  |
| O | 1.38633300  | -1.62480300 | -0.00653100 |

**Transition state**

|   |             |             |             |
|---|-------------|-------------|-------------|
| C | -0.71527100 | -0.80911400 | -0.05712900 |
| C | 0.30347100  | 0.11394800  | -0.12936600 |
| C | -0.28958600 | 1.40541600  | -0.18844400 |
| H | 0.12903000  | 2.26325600  | 0.33957400  |
| H | -0.91167400 | 1.64646500  | -1.04290300 |
| C | -1.81892000 | -0.02160900 | 0.38812200  |
| H | -0.74078500 | -1.83682800 | -0.40949800 |
| H | -1.70466600 | 0.46115700  | 1.35496800  |
| C | -3.23888900 | -0.19631000 | -0.07933900 |
| H | -3.74554600 | -0.95512100 | 0.53713200  |
| H | -3.80746000 | 0.73337100  | 0.03396700  |
| H | -3.29780500 | -0.51467000 | -1.12486100 |
| N | 1.72468600  | -0.13860600 | -0.00236400 |
| O | 2.10091600  | -1.31464500 | -0.01303700 |
| O | 2.46924300  | 0.84197300  | 0.10367500  |

**Cyclobutene (Starting material)**

|   |             |             |             |
|---|-------------|-------------|-------------|
| C | 0.61128100  | -1.00638100 | -0.30950800 |
| C | -0.27036600 | -0.01325400 | -0.13044400 |
| C | 0.70724000  | 1.12552100  | -0.23509400 |
| H | 0.85175300  | 1.70879200  | 0.68016800  |
| H | 0.56063400  | 1.80584100  | -1.08007500 |
| C | 1.77040000  | -0.02588100 | -0.45648400 |
| H | 0.53324900  | -2.08795900 | -0.33891000 |
| H | 2.17694200  | -0.01504200 | -1.47655700 |
| C | 2.90192300  | -0.12774900 | 0.56518600  |
| H | 3.47404200  | -1.05307000 | 0.42731500  |
| H | 3.59450400  | 0.71569700  | 0.45917600  |
| H | 2.51051100  | -0.12122400 | 1.58961700  |
| N | -1.69804100 | -0.02921900 | 0.07875100  |
| O | -2.25463300 | 1.06757900  | 0.19206100  |
| O | -2.26264400 | -1.12533400 | 0.13119800  |

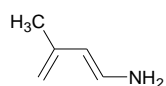

### Butadiene (Product)

|   |             |             |             |
|---|-------------|-------------|-------------|
| C | -0.31440700 | -0.40948400 | -0.21598100 |
| C | 1.06157300  | 0.08937000  | -0.06112800 |
| C | 1.39729600  | 1.39396800  | -0.10627400 |
| H | 2.42009800  | 1.72062200  | 0.06309600  |
| H | 0.66735500  | 2.17086100  | -0.31948100 |
| C | -1.42526600 | 0.25468300  | 0.16760400  |
| H | -0.42491800 | -1.41356800 | -0.63101700 |
| H | -1.34177100 | 1.22008400  | 0.66192000  |
| N | -2.73107600 | -0.21740700 | 0.08159400  |
| H | -3.46113600 | 0.48253500  | 0.07524100  |
| H | -2.90002400 | -0.95956300 | -0.58748200 |
| C | 2.11536300  | -0.97855500 | 0.14561100  |
| H | 2.11067500  | -1.69559100 | -0.68741800 |
| H | 3.11964300  | -0.54847100 | 0.21491900  |
| H | 1.92025500  | -1.55495400 | 1.06007100  |

### Transition state



|   |             |             |             |
|---|-------------|-------------|-------------|
| C | -0.10006100 | -0.86513900 | -0.03553200 |
| C | 0.98075200  | -0.01558800 | -0.08868900 |
| C | 0.40633900  | 1.30312600  | -0.12233300 |
| H | 0.90081200  | 2.14971400  | 0.36989100  |
| H | -0.17664100 | 1.59423100  | -0.99093000 |
| C | -1.19454000 | -0.03244000 | 0.39436600  |
| H | -0.18072400 | -1.92005800 | -0.30013900 |
| H | -1.18139800 | 0.36667100  | 1.40218100  |
| N | -2.47399300 | -0.18490800 | -0.11748300 |
| H | -2.56081300 | -0.33900100 | -1.11415300 |
| H | -3.21119300 | 0.39368100  | 0.26393000  |
| C | 2.44492600  | -0.34104900 | 0.02137000  |
| H | 2.88889900  | 0.19156200  | 0.87511400  |
| H | 2.61416500  | -1.41311900 | 0.17174600  |
| H | 3.00034000  | -0.02278300 | -0.87035300 |

**Cyclobutene (Starting material)**

|   |             |             |             |
|---|-------------|-------------|-------------|
| C | 0.03317600  | -1.00216300 | 0.24493400  |
| C | 0.96346400  | -0.05853000 | 0.01698600  |
| C | -0.02553000 | 1.09421000  | 0.13762700  |
| H | -0.22616500 | 1.63799400  | -0.79319900 |
| H | 0.16283400  | 1.81287400  | 0.94746900  |
| C | -1.09975400 | -0.01144200 | 0.44370400  |
| H | 0.06510300  | -2.08940500 | 0.29180500  |
| H | -1.46006000 | 0.03829200  | 1.48636000  |
| N | -2.18444400 | -0.09076100 | -0.53840300 |
| H | -2.65139200 | -0.99486000 | -0.48200100 |
| H | -2.89180400 | 0.61970100  | -0.35198600 |
| C | 2.43255500  | -0.06100900 | -0.24227800 |
| H | 2.97006200  | 0.50873400  | 0.52884200  |
| H | 2.83657200  | -1.07967800 | -0.25884200 |
| H | 2.66249400  | 0.41527300  | -1.20546400 |

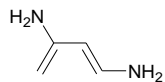

### Butadiene (Product)

|   |             |             |             |
|---|-------------|-------------|-------------|
| C | -0.30143300 | -0.42901400 | -0.23374400 |
| C | 1.08010800  | 0.04546900  | -0.05770800 |
| C | 1.44033200  | 1.34832600  | -0.12588700 |
| H | 2.45558000  | 1.67050800  | 0.09227300  |
| H | 0.72456000  | 2.10946900  | -0.41119100 |
| C | -1.38448500 | 0.24371000  | 0.20649500  |
| H | -0.43933700 | -1.38333800 | -0.74762500 |
| H | -1.25622100 | 1.16171900  | 0.77569500  |
| N | -2.71126800 | -0.07578600 | -0.05473300 |
| N | 2.00918100  | -0.96689400 | 0.24787400  |
| H | 1.72326100  | -1.90841900 | 0.01115500  |
| H | 2.96455500  | -0.77994300 | -0.03214600 |
| H | -3.38045100 | 0.17656800  | 0.66187800  |
| H | -2.88447300 | -0.99876000 | -0.43696000 |

### Transition state

|   |             |             |             |
|---|-------------|-------------|-------------|
| C | -0.08575200 | -0.88560300 | -0.04195400 |
| C | 0.99403100  | -0.02871900 | -0.08654200 |
| C | 0.44909000  | 1.30284400  | -0.09351800 |
| H | 0.96878600  | 2.11437300  | 0.42950200  |
| H | -0.09922200 | 1.62377800  | -0.97416700 |
| C | -1.16274100 | -0.03821100 | 0.40276600  |
| H | -0.17192300 | -1.93673200 | -0.31547500 |
| H | -1.16859800 | 0.34868500  | 1.41645700  |
| N | -2.43332200 | -0.15434800 | -0.13598500 |
| H | -2.50173800 | -0.31570800 | -1.13301200 |
| H | -3.16594700 | 0.43921800  | 0.23091200  |
| N | 2.34504500  | -0.31781400 | 0.07962200  |
| H | 2.99445000  | 0.22815600  | -0.47259200 |
| H | 2.59436200  | -1.29849900 | 0.12840700  |

**Cyclobutene (Starting material)**

|   |             |             |             |
|---|-------------|-------------|-------------|
| C | -0.08575200 | -0.88560300 | -0.04195400 |
| C | 0.99403100  | -0.02871900 | -0.08654200 |
| C | 0.44909000  | 1.30284400  | -0.09351800 |
| H | 0.96878600  | 2.11437300  | 0.42950200  |
| H | -0.09922200 | 1.62377800  | -0.97416700 |
| C | -1.16274100 | -0.03821100 | 0.40276600  |
| H | -0.17192300 | -1.93673200 | -0.31547500 |
| H | -1.16859800 | 0.34868500  | 1.41645700  |
| N | -2.43332200 | -0.15434800 | -0.13598500 |
| H | -2.50173800 | -0.31570800 | -1.13301200 |
| H | -3.16594700 | 0.43921800  | 0.23091200  |
| N | 2.34504500  | -0.31781400 | 0.07962200  |
| H | 2.99445000  | 0.22815600  | -0.47259200 |
| H | 2.59436200  | -1.29849900 | 0.12840700  |

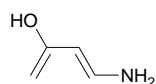**Butadiene (Product)**

|   |             |             |             |
|---|-------------|-------------|-------------|
| C | 0.29439600  | -0.39998000 | 0.29431600  |
| C | -1.08855200 | 0.03679300  | 0.07030800  |
| C | -1.53911700 | 1.30257000  | 0.11122800  |
| H | -2.56907000 | 1.53395300  | -0.14013300 |
| H | -0.88986400 | 2.10954400  | 0.42908500  |
| C | 1.36374600  | 0.24394100  | -0.22241000 |
| H | 0.44014500  | -1.29333200 | 0.90547400  |
| H | 1.21075100  | 1.10040200  | -0.87501300 |
| N | 2.69051800  | -0.11804800 | -0.06628100 |
| H | 3.38633000  | 0.59260100  | -0.24487100 |
| H | 2.92217700  | -0.71853100 | 0.71542900  |
| O | -1.99934000 | -0.97988400 | -0.16897100 |
| H | -1.52221500 | -1.75917900 | -0.49488500 |

**Transition state**

|   |             |             |            |
|---|-------------|-------------|------------|
| C | -0.08007000 | -0.91282200 | 0.00330000 |
|---|-------------|-------------|------------|

|   |             |             |             |
|---|-------------|-------------|-------------|
| C | 0.98902800  | -0.06295000 | -0.07069900 |
| C | 0.48403800  | 1.28091000  | -0.09034200 |
| H | 1.01294500  | 2.08146700  | 0.44103600  |
| H | -0.05149300 | 1.61738800  | -0.97324400 |
| C | -1.14782500 | -0.02947500 | 0.41123100  |
| H | -0.16855100 | -1.96938400 | -0.23701100 |
| H | -1.16483100 | 0.37061500  | 1.41923400  |
| N | -2.40103800 | -0.11336800 | -0.15990700 |
| H | -2.45706000 | -0.32727200 | -1.14752400 |
| H | -3.13179100 | 0.50111500  | 0.17402200  |
| O | 2.30502900  | -0.43057600 | 0.02423700  |
| H | 2.85678500  | 0.31027600  | -0.27200800 |

### Cyclobutene (Starting material)

|   |             |             |             |
|---|-------------|-------------|-------------|
| C | 0.05931400  | -1.03541500 | 0.23129700  |
| C | 0.98080100  | -0.08925900 | -0.00581100 |
| C | 0.05359400  | 1.09342200  | 0.14842000  |
| H | -0.15691900 | 1.66216800  | -0.76442600 |
| H | 0.27708600  | 1.77865300  | 0.97777300  |
| C | -1.03740200 | -0.00690900 | 0.44947200  |
| H | 0.07259500  | -2.11888000 | 0.28176700  |
| H | -1.39252100 | 0.05137400  | 1.49236400  |
| N | -2.12870300 | -0.04061700 | -0.52650500 |
| H | -2.53004900 | -0.97468200 | -0.58282400 |
| H | -2.87996700 | 0.59512700  | -0.26102700 |
| O | 2.31507900  | -0.15184600 | -0.24393300 |
| H | 2.65222100  | 0.73429500  | -0.44689900 |

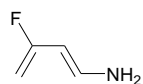

### Butadiene (Product)

|   |             |             |             |
|---|-------------|-------------|-------------|
| C | 0.30101600  | -0.43925800 | 0.20360400  |
| C | -1.06813600 | 0.02565700  | 0.05558600  |
| C | -1.58650600 | 1.25804100  | 0.11007000  |
| H | -2.63750900 | 1.42926700  | -0.09367800 |
| H | -0.96292100 | 2.10670000  | 0.36586200  |

|   |             |             |             |
|---|-------------|-------------|-------------|
| C | 1.37776100  | 0.29098400  | -0.16320200 |
| H | 0.42645900  | -1.44267200 | 0.60754800  |
| H | 1.24228100  | 1.25963600  | -0.63873100 |
| N | 2.69678800  | -0.10400200 | -0.06299800 |
| H | 3.40650800  | 0.61359500  | -0.10113800 |
| H | 2.91732200  | -0.86531000 | 0.56657400  |
| F | -1.93494000 | -1.02063800 | -0.16686700 |

**Transition state**

|   |             |             |             |
|---|-------------|-------------|-------------|
| C | -0.05197400 | -0.92299700 | 0.01440700  |
| C | 0.97888900  | -0.04068800 | -0.08269400 |
| C | 0.48456600  | 1.29302700  | -0.09768400 |
| H | 1.01808800  | 2.08923500  | 0.42872500  |
| H | -0.07008900 | 1.62711300  | -0.96938000 |
| C | -1.12508000 | -0.03980800 | 0.41804900  |
| H | -0.12439200 | -1.97905800 | -0.23068000 |
| H | -1.13763300 | 0.35349100  | 1.42819800  |
| N | -2.37431200 | -0.12158900 | -0.15827500 |
| H | -2.42843700 | -0.33908100 | -1.14522400 |
| H | -3.10293500 | 0.49878100  | 0.16956100  |
| F | 2.30524200  | -0.34850700 | -0.00952700 |

**Cyclobutene (Starting material)**

|   |             |             |             |
|---|-------------|-------------|-------------|
| C | 0.09720200  | -1.03416600 | 0.23482900  |
| C | 0.97338100  | -0.05928700 | -0.00839400 |
| C | 0.04858000  | 1.11056200  | 0.13736100  |
| H | -0.16948600 | 1.66355900  | -0.78180100 |
| H | 0.26681600  | 1.80436700  | 0.95799600  |
| C | -1.01709600 | -0.01354000 | 0.45295800  |
| H | 0.13234000  | -2.11632800 | 0.28140700  |
| H | -1.35628400 | 0.03582000  | 1.50086400  |
| N | -2.10561100 | -0.07640300 | -0.51898500 |
| H | -2.56994800 | -0.98217200 | -0.48316300 |
| H | -2.81143700 | 0.63203000  | -0.32213100 |
| F | 2.29276400  | -0.05820800 | -0.26897800 |

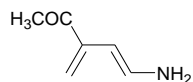

### Butadiene (Product)

|   |             |             |             |
|---|-------------|-------------|-------------|
| C | -0.97136200 | -0.27469500 | -0.18363600 |
| C | 0.30837500  | 0.43262500  | -0.10980400 |
| C | 0.45507400  | 1.77664000  | -0.17367600 |
| H | 1.41725900  | 2.26199100  | -0.05443700 |
| H | -0.39177700 | 2.43290900  | -0.35485200 |
| C | -2.15767100 | 0.26089900  | 0.17636700  |
| H | -0.92507300 | -1.31034100 | -0.51202500 |
| H | -2.21135700 | 1.26355500  | 0.59764500  |
| N | -3.39922500 | -0.33427200 | 0.00932200  |
| H | -3.39544300 | -1.32014600 | -0.22777300 |
| H | -4.10928600 | -0.09971200 | 0.69175400  |
| C | 1.52574100  | -0.45148700 | 0.01201100  |
| C | 2.90228100  | 0.17194700  | 0.18817800  |
| H | 3.63313500  | -0.63223400 | 0.29486600  |
| H | 3.17136100  | 0.78734800  | -0.67837200 |
| H | 2.93941200  | 0.81529600  | 1.07506400  |
| O | 1.41146400  | -1.66929200 | -0.04422100 |

### Transition state

|   |             |             |             |
|---|-------------|-------------|-------------|
| C | -0.73457200 | -0.78565700 | -0.08011100 |
| C | 0.23603900  | 0.19937100  | -0.15723400 |
| C | -0.50617700 | 1.43009300  | -0.17586200 |
| H | -0.14745700 | 2.31982700  | 0.34677900  |
| H | -1.12373100 | 1.64091200  | -1.04302700 |
| C | -1.89428800 | -0.07948100 | 0.39088300  |
| H | -0.71865800 | -1.82903300 | -0.39452200 |
| H | -1.86176600 | 0.32782900  | 1.39583000  |
| N | -3.17416900 | -0.37880100 | -0.04652400 |
| H | -3.30349800 | -0.54085600 | -1.03722400 |
| H | -3.94648300 | 0.11707500  | 0.37917800  |
| C | 1.70556600  | 0.07423400  | -0.01720800 |
| C | 2.30180800  | -1.32391700 | 0.01604100  |
| H | 3.38289000  | -1.26068500 | -0.12806500 |

|   |            |             |             |
|---|------------|-------------|-------------|
| H | 2.10038500 | -1.79396700 | 0.98720900  |
| H | 1.86135400 | -1.96797800 | -0.75469900 |
| O | 2.41573600 | 1.06882800  | 0.08939500  |

### Cyclobutene (Starting material)

|   |             |             |             |
|---|-------------|-------------|-------------|
| C | -0.64552000 | -0.96929200 | 0.28992000  |
| C | 0.21405800  | 0.05548900  | 0.11037700  |
| C | -0.86405800 | 1.12492700  | 0.15880400  |
| H | -1.04452500 | 1.63380400  | -0.79342400 |
| H | -0.77613900 | 1.86528100  | 0.96164400  |
| C | -1.85914500 | -0.06435300 | 0.42231900  |
| H | -0.53368700 | -2.05022200 | 0.34113100  |
| H | -2.25725300 | -0.04594100 | 1.45210900  |
| N | -2.88346000 | -0.24200500 | -0.60535300 |
| H | -3.37887500 | -1.12313000 | -0.47479100 |
| H | -3.57833200 | 0.50158800  | -0.54669100 |
| C | 1.67793200  | 0.16304900  | -0.05520500 |
| C | 2.48521300  | -1.12141600 | -0.11372800 |
| H | 2.19343300  | -1.71436900 | -0.98992500 |
| H | 3.54865400  | -0.88079400 | -0.17877100 |
| H | 2.30189500  | -1.73957000 | 0.77364700  |
| O | 2.20727000  | 1.26462000  | -0.14779600 |

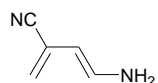

### Butadiene (Product)

|   |             |             |             |
|---|-------------|-------------|-------------|
| C | 0.53028800  | -0.35340600 | 0.22518100  |
| C | -0.73565500 | 0.37734500  | 0.08696700  |
| C | -0.90454800 | 1.71977600  | 0.07773300  |
| H | -1.87926800 | 2.16554000  | -0.08768300 |
| H | -0.06719800 | 2.39196000  | 0.23857400  |
| C | 1.72712800  | 0.13992500  | -0.16723000 |
| H | 0.47081000  | -1.36179400 | 0.63044400  |
| H | 1.78635700  | 1.10993100  | -0.65585500 |
| N | 2.93656500  | -0.51500200 | -0.08386300 |
| H | 3.78158000  | 0.03017400  | -0.17339900 |

|   |             |             |             |
|---|-------------|-------------|-------------|
| H | 3.01465100  | -1.30453300 | 0.54439800  |
| C | -1.91176000 | -0.45215200 | -0.04528500 |
| N | -2.84223000 | -1.14502800 | -0.13909000 |

**Transition state**

|   |             |             |             |
|---|-------------|-------------|-------------|
| C | -0.35992800 | -0.84753200 | -0.05165300 |
| C | 0.65810600  | 0.08066900  | -0.10483500 |
| C | -0.00131200 | 1.36188800  | -0.12902100 |
| H | 0.41258100  | 2.22632500  | 0.39607900  |
| H | -0.57474500 | 1.61262600  | -1.01535400 |
| C | -1.49030100 | -0.07152800 | 0.39156600  |
| H | -0.37713100 | -1.89258100 | -0.35505000 |
| H | -1.46664700 | 0.32057700  | 1.40250700  |
| N | -2.76242900 | -0.28576000 | -0.09352500 |
| H | -2.87559100 | -0.47048500 | -1.08179000 |
| H | -3.53265800 | 0.22093000  | 0.32176600  |
| C | 2.06574400  | -0.15168500 | -0.01010500 |
| N | 3.21676200  | -0.32113500 | 0.05868600  |

**Cyclobutene (Starting material)**

|   |             |             |             |
|---|-------------|-------------|-------------|
| C | -0.28216100 | -1.00121300 | 0.26422600  |
| C | 0.64165900  | -0.03854100 | 0.07940100  |
| C | -0.35965700 | 1.10827200  | 0.15292100  |
| H | -0.51951100 | 1.63279800  | -0.79405500 |
| H | -0.20486100 | 1.82918000  | 0.96349200  |
| C | -1.42770500 | -0.01590500 | 0.42191600  |
| H | -0.23096500 | -2.08574000 | 0.30312500  |
| H | -1.80691200 | 0.02247700  | 1.45771400  |
| N | -2.47286000 | -0.11296500 | -0.59267600 |
| H | -2.97762500 | -0.99429600 | -0.51022400 |
| H | -3.15640800 | 0.63425800  | -0.47718900 |
| C | 2.05256100  | -0.05546900 | -0.09876700 |
| N | 3.20830300  | -0.03296800 | -0.24461700 |



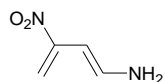

### Butadiene (Product)

|   |             |             |             |
|---|-------------|-------------|-------------|
| C | -0.88033500 | -0.26428800 | -0.24911700 |
| C | 0.36933000  | 0.46888100  | -0.13509400 |
| C | 0.57555500  | 1.79545200  | -0.16541000 |
| H | 1.55607900  | 2.21722900  | 0.01564600  |
| H | -0.24800600 | 2.46772900  | -0.37975200 |
| C | -2.05139500 | 0.23499200  | 0.20884400  |
| H | -0.84479000 | -1.24858300 | -0.70553100 |
| H | -2.07358800 | 1.17919100  | 0.74972000  |
| N | -3.29687400 | -0.32304600 | 0.01278800  |
| N | 1.58853500  | -0.39015700 | 0.04145100  |
| H | -4.00897900 | -0.12640700 | 0.70351300  |
| H | -3.33211000 | -1.26962200 | -0.34700200 |
| O | 1.42663000  | -1.61032500 | -0.01040200 |
| O | 2.67722400  | 0.15565800  | 0.21395100  |

### Transition state

|   |             |             |             |
|---|-------------|-------------|-------------|
| C | -0.70814400 | -0.84211200 | -0.00258200 |
| C | 0.26678600  | 0.11056400  | -0.12140600 |
| C | -0.37209600 | 1.38714000  | -0.18123500 |
| H | 0.03302900  | 2.25241300  | 0.34511100  |
| H | -0.93930700 | 1.62553000  | -1.07566200 |
| C | -1.83534400 | -0.03466300 | 0.40048900  |
| H | -0.71106900 | -1.89794900 | -0.25765400 |
| H | -1.81427900 | 0.39308900  | 1.39715700  |
| N | -3.10328600 | -0.24924700 | -0.09116900 |
| H | -3.20595700 | -0.49751600 | -1.06659400 |
| H | -3.86641400 | 0.30324800  | 0.27629500  |
| N | 1.70085700  | -0.11877100 | -0.00803300 |
| O | 2.43032000  | 0.87253000  | 0.08454200  |
| O | 2.09640400  | -1.28856300 | -0.02152000 |

**Cyclobutene (Starting material)**

|   |             |             |             |
|---|-------------|-------------|-------------|
| C | -0.62269900 | -1.01264400 | 0.26334300  |
| C | 0.25458100  | -0.01536100 | 0.10526400  |
| C | -0.72396300 | 1.12263600  | 0.19400900  |
| H | -0.88390300 | 1.66978500  | -0.73935100 |
| H | -0.58260500 | 1.82153100  | 1.02438800  |
| C | -1.77824500 | -0.02981300 | 0.42869600  |
| H | -0.54894400 | -2.09418600 | 0.28002500  |
| H | -2.16409900 | -0.01940900 | 1.46186600  |
| N | -2.80378900 | -0.12056800 | -0.60237600 |
| H | -3.32625000 | -0.99158900 | -0.52342700 |
| H | -3.47311700 | 0.64248500  | -0.51333500 |
| N | 1.68925500  | -0.02646800 | -0.07015100 |
| O | 2.25600600  | -1.12091000 | -0.11650300 |
| O | 2.24432000  | 1.07237600  | -0.16229100 |

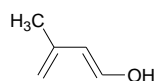**Butadiene (Product)**

|   |             |             |             |
|---|-------------|-------------|-------------|
| C | -0.32832700 | -0.40494600 | -0.25939800 |
| C | 1.04564200  | 0.09155600  | -0.06718900 |
| C | 1.36680700  | 1.39875800  | -0.09989900 |
| H | 2.38231000  | 1.73659100  | 0.09139000  |
| H | 0.63278300  | 2.16527600  | -0.33407600 |
| C | -1.42404000 | 0.21919900  | 0.19548500  |
| H | -0.45853800 | -1.35917000 | -0.76984400 |
| H | -1.37106000 | 1.13632200  | 0.78000000  |
| O | -2.68330100 | -0.26207500 | -0.05834500 |
| H | -3.33546200 | 0.22490700  | 0.46521600  |
| C | 2.09503400  | -0.97481700 | 0.16147100  |
| H | 1.87557000  | -1.55863000 | 1.06541400  |
| H | 2.11479500  | -1.68529200 | -0.67655000 |
| H | 3.09531600  | -0.54190200 | 0.26239200  |

**Transition state**

|   |             |             |             |
|---|-------------|-------------|-------------|
| C | -0.12470000 | -0.85930400 | -0.10002000 |
| C | 0.96858100  | -0.01483100 | -0.09904100 |
| C | 0.40745600  | 1.30271100  | -0.13476600 |
| H | 0.89526400  | 2.14475400  | 0.37166200  |
| H | -0.18692700 | 1.59577600  | -0.99346000 |
| C | -1.19284100 | -0.03443800 | 0.35754400  |
| H | -0.21924100 | -1.89650000 | -0.41778900 |
| H | -1.18950900 | 0.35736900  | 1.36935400  |
| O | -2.44043700 | -0.17581800 | -0.19774500 |
| H | -3.11612700 | 0.21684700  | 0.37780400  |
| C | 2.42532300  | -0.34968900 | 0.06453000  |
| H | 3.01252800  | -0.03834900 | -0.80886800 |
| H | 2.84330500  | 0.18217500  | 0.93150100  |
| H | 2.58129800  | -1.42222400 | 0.22227200  |

**Cyclobutene (Starting material)**

|   |             |             |             |
|---|-------------|-------------|-------------|
| C | 0.02015600  | -1.00949200 | 0.20097300  |
| C | 0.94994800  | -0.05600300 | 0.00639400  |
| C | -0.04527700 | 1.09460300  | 0.11603900  |
| H | -0.24866300 | 1.62441500  | -0.82217900 |
| H | 0.13477800  | 1.82805000  | 0.91557700  |
| C | -1.10633900 | -0.03010200 | 0.41909400  |
| H | 0.04790900  | -2.09603800 | 0.23025400  |
| H | -1.48975300 | 0.00403800  | 1.45036600  |
| O | -2.18579300 | -0.17788500 | -0.49763700 |
| H | -2.88448800 | 0.45448600  | -0.26639100 |
| C | 2.42656700  | -0.04721100 | -0.20180800 |
| H | 2.93222800  | 0.51245800  | 0.59770300  |
| H | 2.83690300  | -1.06300300 | -0.22103900 |
| H | 2.68709600  | 0.44790700  | -1.14734600 |

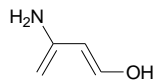

### Butadiene (Product)

|   |             |             |             |
|---|-------------|-------------|-------------|
| C | -0.31625000 | -0.41429000 | -0.28024700 |
| C | 1.06585900  | 0.05035900  | -0.06384300 |
| C | 1.42535400  | 1.35311900  | -0.11205700 |
| H | 2.43903400  | 1.67345500  | 0.11578100  |
| H | 0.71218800  | 2.11623700  | -0.39826600 |
| C | -1.38755300 | 0.21876800  | 0.21491800  |
| H | -0.47118000 | -1.32676500 | -0.85652300 |
| H | -1.29690100 | 1.09881100  | 0.84870900  |
| O | -2.66144900 | -0.20110000 | -0.06426800 |
| H | -3.29696500 | 0.28747600  | 0.47795700  |
| N | 1.97700200  | -0.97099400 | 0.25160000  |
| H | 1.69664500  | -1.90788500 | -0.00858600 |
| H | 2.94530200  | -0.78331400 | 0.02124600  |

### Transition state

|   |             |             |             |
|---|-------------|-------------|-------------|
| C | -0.11001900 | -0.87721100 | -0.10009800 |
| C | 0.98350300  | -0.02768300 | -0.09445400 |
| C | 0.45313800  | 1.30391700  | -0.10617600 |
| H | 0.97014800  | 2.11291900  | 0.42355600  |
| H | -0.10499000 | 1.62305800  | -0.97979200 |
| C | -1.16162200 | -0.03727500 | 0.36375700  |
| H | -0.21088200 | -1.90886400 | -0.43054600 |
| H | -1.18021400 | 0.35061800  | 1.37787700  |
| O | -2.40069400 | -0.14816800 | -0.21735700 |
| H | -3.07623800 | 0.26344400  | 0.34532400  |
| N | 2.32216800  | -0.33248000 | 0.12079300  |
| H | 3.00132900  | 0.21629800  | -0.39090200 |
| H | 2.56122600  | -1.31526400 | 0.16961500  |

### Cyclobutene (Starting material)

|   |            |             |             |
|---|------------|-------------|-------------|
| C | 0.03681600 | -1.03283300 | 0.18358700  |
| C | 0.96672000 | -0.06864800 | -0.00710800 |

|   |             |             |             |
|---|-------------|-------------|-------------|
| C | -0.00214900 | 1.08636800  | 0.14258600  |
| H | -0.20945100 | 1.65133200  | -0.77398200 |
| H | 0.19985700  | 1.78188000  | 0.96957600  |
| C | -1.06981700 | -0.04205300 | 0.41899600  |
| H | 0.05746800  | -2.11756400 | 0.21708500  |
| H | -1.47117500 | -0.01006300 | 1.44388600  |
| O | -2.14866900 | -0.14464700 | -0.51126100 |
| H | -2.86162200 | 0.45183800  | -0.23180400 |
| N | 2.33876600  | -0.01962100 | -0.13513500 |
| H | 2.71184200  | 0.77045300  | -0.64745000 |
| H | 2.80166100  | -0.89035900 | -0.36964200 |

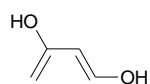

### Butadiene (Product)

|   |             |             |             |
|---|-------------|-------------|-------------|
| C | 0.30963200  | -0.39666900 | 0.31216300  |
| C | -1.07249500 | 0.03807200  | 0.06771000  |
| C | -1.51317300 | 1.30669500  | 0.09196200  |
| H | -2.54334100 | 1.54114900  | -0.15563500 |
| H | -0.85808400 | 2.11237700  | 0.40014800  |
| C | 1.36860800  | 0.22602000  | -0.22568600 |
| H | 0.47285800  | -1.26300200 | 0.95356000  |
| H | 1.25553400  | 1.06793700  | -0.90632600 |
| O | 2.64809200  | -0.15463900 | 0.06590500  |
| H | 3.27570500  | 0.33402500  | -0.48572500 |
| O | -1.98000200 | -0.97780000 | -0.17107700 |
| H | -1.50282700 | -1.77768500 | -0.44154200 |

### Transition state

|   |             |             |             |
|---|-------------|-------------|-------------|
| C | -0.10483100 | -0.90562000 | -0.06019600 |
| C | 0.97938300  | -0.06176200 | -0.07961000 |
| C | 0.48873900  | 1.28069200  | -0.10561100 |
| H | 1.01681900  | 2.08140200  | 0.42651800  |
| H | -0.06279300 | 1.61237400  | -0.97887000 |
| C | -1.14637800 | -0.03148800 | 0.37119600  |
| H | -0.20862600 | -1.94307100 | -0.36324800 |

|   |             |             |             |
|---|-------------|-------------|-------------|
| H | -1.17051500 | 0.37071200  | 1.37925300  |
| O | -2.36985900 | -0.11215000 | -0.23668800 |
| H | -3.04542500 | 0.33804900  | 0.29598400  |
| O | 2.28339400  | -0.44262400 | 0.07239800  |
| H | 2.86077600  | 0.28779000  | -0.19998400 |

### Cyclobutene (Starting material)

|   |             |             |             |
|---|-------------|-------------|-------------|
| C | 0.04937400  | -1.04496500 | 0.18542200  |
| C | 0.96825900  | -0.08520600 | -0.01296900 |
| C | 0.02904400  | 1.09031600  | 0.14171700  |
| H | -0.18270900 | 1.65721200  | -0.77235600 |
| H | 0.23991900  | 1.78137200  | 0.97051500  |
| C | -1.04523300 | -0.03591000 | 0.42422800  |
| H | 0.06269400  | -2.12809400 | 0.20991200  |
| H | -1.43594300 | -0.00158900 | 1.45212300  |
| O | -2.12218100 | -0.12956300 | -0.50259800 |
| H | -2.82537400 | 0.48268300  | -0.23292200 |
| O | 2.30829400  | -0.13204300 | -0.20433400 |
| H | 2.64385000  | 0.75585200  | -0.40219900 |

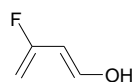

### Butadiene (Product)

|   |             |             |             |
|---|-------------|-------------|-------------|
| C | -0.31674400 | -0.43649700 | -0.24083600 |
| C | 1.05301100  | 0.02573200  | -0.06002400 |
| C | 1.55935600  | 1.26169000  | -0.10260200 |
| H | 2.60679900  | 1.44207300  | 0.11240800  |
| H | 0.93168200  | 2.10369500  | -0.36930000 |
| C | -1.37907100 | 0.26258400  | 0.18556200  |
| H | -0.46243700 | -1.39918900 | -0.72519400 |
| H | -1.27576800 | 1.19532200  | 0.73748000  |
| O | -2.65309500 | -0.15760100 | -0.06221300 |
| H | -3.28787000 | 0.39460100  | 0.41673300  |
| F | 1.91256000  | -1.01741700 | 0.18144200  |

**Transition state**

|   |             |             |             |
|---|-------------|-------------|-------------|
| C | -0.07909900 | -0.91820700 | -0.05076900 |
| C | 0.96952800  | -0.04259300 | -0.09150100 |
| C | 0.49358300  | 1.29142600  | -0.11272300 |
| H | 1.02683100  | 2.08563400  | 0.41681400  |
| H | -0.08060200 | 1.62174500  | -0.97153700 |
| C | -1.12498100 | -0.04365500 | 0.37860700  |
| H | -0.16943400 | -1.95468700 | -0.35939200 |
| H | -1.14174100 | 0.35345900  | 1.38835100  |
| O | -2.34193300 | -0.11714000 | -0.23530900 |
| H | -3.01774500 | 0.34608000  | 0.28591700  |
| F | 2.28488500  | -0.35966000 | 0.04229300  |

**Cyclobutene (Starting material)**

|   |             |             |             |
|---|-------------|-------------|-------------|
| C | 0.08299400  | -1.03801200 | 0.20216400  |
| C | 0.95986100  | -0.05539200 | -0.01538700 |
| C | 0.02810200  | 1.11227100  | 0.12310900  |
| H | -0.19087600 | 1.65912000  | -0.79969200 |
| H | 0.23925300  | 1.81489500  | 0.93900600  |
| C | -1.02693700 | -0.03151200 | 0.42867700  |
| H | 0.11379200  | -2.11983500 | 0.23609900  |
| H | -1.40362600 | 0.00463100  | 1.46070700  |
| O | -2.09875400 | -0.16842200 | -0.49106000 |
| H | -2.79371100 | 0.47075400  | -0.26650500 |
| F | 2.28456400  | -0.04514700 | -0.23028000 |

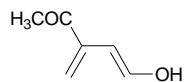**Butadiene (Product)**

|   |             |             |             |
|---|-------------|-------------|-------------|
| C | -0.98336000 | -0.27810500 | -0.23444700 |
| C | 0.29678100  | 0.43303300  | -0.12799500 |
| C | 0.42888100  | 1.77653500  | -0.18485400 |
| H | 1.38459100  | 2.27161900  | -0.05154700 |
| H | -0.42234800 | 2.42330800  | -0.37911400 |
| C | -2.14827700 | 0.22515900  | 0.19771700  |

|   |             |             |             |
|---|-------------|-------------|-------------|
| H | -0.96170600 | -1.28599000 | -0.63844200 |
| H | -2.22297500 | 1.18859900  | 0.70103900  |
| O | -3.32545800 | -0.45096700 | 0.02678800  |
| H | -4.03078000 | -0.02713700 | 0.53657600  |
| C | 1.51484500  | -0.44752100 | 0.01085400  |
| C | 2.88400600  | 0.18157600  | 0.21647800  |
| H | 2.90076600  | 0.82214600  | 1.10600400  |
| H | 3.61650100  | -0.61937500 | 0.33464300  |
| H | 3.16707400  | 0.80079100  | -0.64304600 |
| O | 1.40191100  | -1.66378500 | -0.05586600 |

**Transition state**

|   |             |             |             |
|---|-------------|-------------|-------------|
| C | -0.75421000 | -0.78390800 | -0.13808500 |
| C | 0.22582200  | 0.20072300  | -0.18595700 |
| C | -0.50433300 | 1.43167700  | -0.21571000 |
| H | -0.14635400 | 2.32319300  | 0.30438400  |
| H | -1.14622700 | 1.62829800  | -1.06726400 |
| C | -1.88559200 | -0.08265700 | 0.36319400  |
| H | -0.75408700 | -1.81439400 | -0.48763700 |
| H | -1.85420500 | 0.33286500  | 1.36572500  |
| O | -3.13514500 | -0.37714500 | -0.11051000 |
| H | -3.81893200 | -0.04774500 | 0.49441000  |
| C | 1.69173800  | 0.07313400  | -0.00262100 |
| C | 2.28584200  | -1.32487600 | 0.01664400  |
| H | 1.88885200  | -1.93873500 | -0.80115000 |
| H | 3.37305800  | -1.25851700 | -0.06550600 |
| H | 2.02956400  | -1.83008100 | 0.95665900  |
| O | 2.39423600  | 1.06721400  | 0.14495900  |

**Cyclobutene (Starting material)**

|   |             |             |             |
|---|-------------|-------------|-------------|
| C | -0.65720900 | -0.97154400 | 0.24398000  |
| C | 0.20270000  | 0.05638900  | 0.07651200  |
| C | -0.87411200 | 1.12971400  | 0.11050900  |
| H | -1.06557200 | 1.61056100  | -0.85384400 |
| H | -0.78168000 | 1.89403700  | 0.89102700  |
| C | -1.85917700 | -0.06899100 | 0.39933600  |
| H | -0.55545800 | -2.05272300 | 0.28740600  |



|   |             |             |             |
|---|-------------|-------------|-------------|
| H | -2.25929900 | -0.05179500 | 1.42464600  |
| O | -2.89147000 | -0.33153300 | -0.53658300 |
| H | -3.63251500 | 0.27231100  | -0.36954300 |
| C | 1.67211800  | 0.16544400  | -0.04727800 |
| C | 2.48024500  | -1.11815500 | -0.09351000 |
| H | 2.17675500  | -1.73171400 | -0.95112500 |
| H | 3.54236700  | -0.87755700 | -0.17665000 |
| H | 2.31016200  | -1.71612900 | 0.81038400  |
| O | 2.20120100  | 1.26851600  | -0.11336700 |

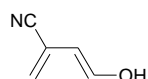

### Butadiene (Product)

|   |             |             |             |
|---|-------------|-------------|-------------|
| C | -0.54816700 | -0.34094200 | -0.29755300 |
| C | 0.72033400  | 0.38081000  | -0.10529700 |
| C | 0.86858600  | 1.72275700  | -0.06793400 |
| H | 1.83109300  | 2.18100100  | 0.13371600  |
| H | 0.02537100  | 2.38159800  | -0.25075000 |
| C | -1.71183900 | 0.08984600  | 0.21287000  |
| H | -0.52615900 | -1.27749900 | -0.84927600 |
| H | -1.77735500 | 0.97399300  | 0.84530900  |
| O | -2.88149300 | -0.56358100 | -0.03808000 |
| H | -3.59110700 | -0.21245300 | 0.51935400  |
| C | 1.89282700  | -0.44778900 | 0.05063400  |
| N | 2.82280700  | -1.13801200 | 0.16428200  |

### Transition state

|   |             |             |             |
|---|-------------|-------------|-------------|
| C | -0.38360700 | -0.84067300 | -0.13333700 |
| C | 0.64546900  | 0.08614600  | -0.13388600 |
| C | -0.00113000 | 1.36637000  | -0.14013300 |
| H | 0.41067900  | 2.22176200  | 0.40115300  |
| H | -0.60557300 | 1.62312200  | -1.00256200 |
| C | -1.48394100 | -0.08345200 | 0.36258000  |
| H | -0.41793400 | -1.86185900 | -0.50367600 |
| H | -1.45488200 | 0.29526700  | 1.37955400  |
| O | -2.72844300 | -0.28373100 | -0.15681400 |

|   |             |             |            |
|---|-------------|-------------|------------|
| H | -3.41340800 | 0.05584200  | 0.44151100 |
| C | 2.04795600  | -0.15258600 | 0.00444000 |
| N | 3.19431100  | -0.33130300 | 0.11150700 |

### Cyclobutene (Starting material)

|   |             |             |             |
|---|-------------|-------------|-------------|
| C | -0.29544100 | -1.00599800 | 0.21364800  |
| C | 0.62993100  | -0.03863500 | 0.05302300  |
| C | -0.36973900 | 1.11209400  | 0.11386100  |
| H | -0.53731700 | 1.61421100  | -0.84365600 |
| H | -0.21343500 | 1.85399000  | 0.90601200  |
| C | -1.43056500 | -0.02425900 | 0.39621600  |
| H | -0.25469700 | -2.09043000 | 0.23636300  |
| H | -1.81543100 | 0.00678600  | 1.42618300  |
| O | -2.48370500 | -0.19323300 | -0.53224800 |
| H | -3.21965600 | 0.39290200  | -0.29537900 |
| C | 2.04532300  | -0.05218400 | -0.08133000 |
| N | 3.20473200  | -0.02538600 | -0.19200700 |

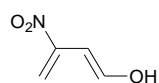

### Butadiene (Product)

|   |             |             |             |
|---|-------------|-------------|-------------|
| C | -0.89318000 | -0.25302200 | -0.30132400 |
| C | 0.36033400  | 0.47497600  | -0.14519000 |
| C | 0.56150300  | 1.80012300  | -0.15222300 |
| H | 1.54078600  | 2.22068400  | 0.04047000  |
| H | -0.26188700 | 2.47358700  | -0.36346300 |
| C | -2.04100400 | 0.20133600  | 0.22555700  |
| H | -0.88668300 | -1.19389400 | -0.84119400 |
| H | -2.08400400 | 1.09261800  | 0.85027800  |
| O | -3.22304800 | -0.43571000 | -0.00013600 |
| H | -3.91880900 | -0.06847000 | 0.56437200  |
| N | 1.57141800  | -0.39002800 | 0.04101300  |
| O | 2.66103400  | 0.15147700  | 0.21965300  |
| O | 1.39760800  | -1.60761900 | -0.00682700 |

**Transition state**

|   |             |             |             |
|---|-------------|-------------|-------------|
| C | -0.73064900 | -0.83930400 | -0.07748200 |
| C | 0.25811100  | 0.11213200  | -0.15389200 |
| C | -0.36162200 | 1.39101600  | -0.21214500 |
| H | 0.04882600  | 2.25355500  | 0.31433500  |
| H | -0.96544700 | 1.62333600  | -1.08261300 |
| C | -1.82774100 | -0.04417700 | 0.37134800  |
| H | -0.75298500 | -1.87809400 | -0.38970400 |
| H | -1.79702400 | 0.38935900  | 1.36636900  |
| O | -3.06695000 | -0.25128000 | -0.14998800 |
| H | -3.75151100 | 0.15403900  | 0.40672600  |
| N | 1.68638100  | -0.12186200 | 0.00417200  |
| O | 2.07713900  | -1.29210800 | -0.00864200 |
| O | 2.41292100  | 0.86749300  | 0.13221900  |

**Cyclobutene (Starting material)**

|   |             |             |             |
|---|-------------|-------------|-------------|
| C | -0.63554800 | -1.01105200 | 0.22601400  |
| C | 0.24363000  | -0.01316700 | 0.07095000  |
| C | -0.73257900 | 1.13026300  | 0.13861700  |
| H | -0.90330300 | 1.64748300  | -0.80971200 |
| H | -0.58466400 | 1.85676300  | 0.94459700  |
| C | -1.78015900 | -0.03083400 | 0.40291600  |
| H | -0.57281300 | -2.09253200 | 0.24473500  |
| H | -2.17119300 | -0.01334200 | 1.43044700  |
| O | -2.81530400 | -0.21297200 | -0.53950500 |
| H | -3.53589100 | 0.40892300  | -0.35050600 |
| N | 1.68410200  | -0.02542900 | -0.05849100 |
| O | 2.24879700  | -1.12046600 | -0.09861500 |
| O | 2.24239200  | 1.07336900  | -0.12201800 |

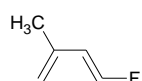**Butadiene (Product)**

|   |             |             |             |
|---|-------------|-------------|-------------|
| C | -0.35479500 | -0.36790100 | -0.28662500 |
| C | 1.03307700  | 0.09122600  | -0.07336800 |

|   |             |             |             |
|---|-------------|-------------|-------------|
| C | 1.37252500  | 1.39180800  | -0.09902900 |
| H | 2.39353400  | 1.71253400  | 0.09205200  |
| H | 0.64904900  | 2.16932900  | -0.32858900 |
| C | -1.42139500 | 0.23757000  | 0.23472700  |
| H | -0.51353500 | -1.27677800 | -0.86658500 |
| H | -1.42326700 | 1.10474700  | 0.88642500  |
| F | -2.68038700 | -0.21416200 | -0.00598000 |
| C | 2.05154300  | -1.00216800 | 0.16040600  |
| H | 1.80864100  | -1.58322300 | 1.05984900  |
| H | 2.06322000  | -1.70929200 | -0.68042700 |
| H | 3.06011600  | -0.59307600 | 0.27442400  |

**Transition state**

|   |             |             |             |
|---|-------------|-------------|-------------|
| C | -0.16078900 | -0.84088400 | -0.14419000 |
| C | 0.95339500  | -0.01443300 | -0.11803800 |
| C | 0.42590000  | 1.31065900  | -0.14429300 |
| H | 0.92700500  | 2.13628900  | 0.37424800  |
| H | -0.18559400 | 1.62406300  | -0.98215800 |
| C | -1.18227000 | -0.00749200 | 0.36040700  |
| H | -0.27752200 | -1.86880200 | -0.48143900 |
| H | -1.20544000 | 0.37990200  | 1.37087100  |
| F | -2.46709300 | -0.14154600 | -0.10318700 |
| C | 2.39771900  | -0.38105500 | 0.08264100  |
| H | 3.01451800  | -0.07033100 | -0.76986600 |
| H | 2.80056600  | 0.13017300  | 0.96850500  |
| H | 2.52657000  | -1.45815200 | 0.22935600  |

**Cyclobutene (Starting material)**

|   |             |             |             |
|---|-------------|-------------|-------------|
| C | 0.00311500  | -1.02179500 | 0.17807100  |
| C | 0.93152100  | -0.06103400 | 0.00246900  |
| C | -0.06882400 | 1.08733200  | 0.12580600  |
| H | -0.28433600 | 1.62117500  | -0.80641600 |
| H | 0.10605100  | 1.81677500  | 0.92828800  |
| C | -1.10696800 | -0.03698800 | 0.42545300  |
| H | 0.03357300  | -2.10778400 | 0.19949700  |
| H | -1.54840000 | -0.02338000 | 1.42766300  |
| F | -2.19050700 | -0.08717300 | -0.47375500 |

|   |            |             |             |
|---|------------|-------------|-------------|
| C | 2.40892100 | -0.04199400 | -0.19142000 |
| H | 2.90260200 | 0.50673800  | 0.62266500  |
| H | 2.82503300 | -1.05472700 | -0.22503100 |
| H | 2.67345700 | 0.47263700  | -1.12515300 |

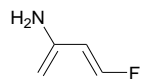

### Butadiene (Product)

|   |             |             |             |
|---|-------------|-------------|-------------|
| C | -0.34521300 | -0.37543700 | -0.30608500 |
| C | 1.04946300  | 0.04771400  | -0.06909800 |
| C | 1.43656100  | 1.34094900  | -0.08260800 |
| H | 2.46161800  | 1.63019700  | 0.13582100  |
| H | 0.74764200  | 2.12610200  | -0.37019500 |
| C | -1.38684100 | 0.23883800  | 0.25271600  |
| H | -0.51769400 | -1.24014200 | -0.94490800 |
| H | -1.35215900 | 1.07261000  | 0.94562000  |
| F | -2.66006200 | -0.15015100 | -0.00971600 |
| N | 1.94184300  | -1.02743000 | 0.07990000  |
| H | 1.59977600  | -1.79500200 | 0.64839000  |
| H | 2.88464400  | -0.76278100 | 0.34386400  |

### Transition state

|   |             |             |             |
|---|-------------|-------------|-------------|
| C | -0.15215400 | -0.86062900 | -0.13743200 |
| C | 0.96873600  | -0.03703800 | -0.11115900 |
| C | 0.47491800  | 1.30425400  | -0.11194800 |
| H | 1.01567100  | 2.10006600  | 0.41501500  |
| H | -0.09749400 | 1.64514300  | -0.96672600 |
| C | -1.14970300 | -0.00590900 | 0.37430300  |
| H | -0.28319600 | -1.87902900 | -0.49365700 |
| H | -1.20089600 | 0.38044400  | 1.38452500  |
| F | -2.42807500 | -0.10219400 | -0.12303300 |
| N | 2.29493300  | -0.40593600 | 0.00938600  |
| H | 2.98275100  | 0.33351500  | 0.05846400  |
| H | 2.52052200  | -1.22290000 | 0.56138700  |

**Cyclobutene (Starting material)**

|   |             |             |             |
|---|-------------|-------------|-------------|
| C | 0.01874100  | -1.04489200 | 0.16666800  |
| C | 0.94821200  | -0.07325400 | -0.01062900 |
| C | -0.02709900 | 1.07752800  | 0.15892300  |
| H | -0.24742600 | 1.65256100  | -0.74740100 |
| H | 0.17149900  | 1.76384200  | 0.99280000  |
| C | -1.06973000 | -0.05172700 | 0.42936100  |
| H | 0.04355700  | -2.12892300 | 0.19839500  |
| H | -1.53886300 | -0.04162600 | 1.41891200  |
| F | -2.14893700 | -0.05542100 | -0.49031700 |
| N | 2.31352300  | -0.01668400 | -0.13622600 |
| H | 2.70057600  | 0.79995700  | -0.59189800 |
| H | 2.79568400  | -0.87616900 | -0.37031500 |

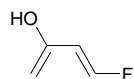**Butadiene (Product)**

|   |             |             |             |
|---|-------------|-------------|-------------|
| C | 0.33677500  | -0.36010100 | 0.32465000  |
| C | -1.05930000 | 0.03493400  | 0.06908900  |
| C | -1.52208100 | 1.29361600  | 0.08837000  |
| H | -2.56041300 | 1.50564700  | -0.14461600 |
| H | -0.87658600 | 2.11438100  | 0.37590200  |
| C | 1.36777500  | 0.24788400  | -0.26208100 |
| H | 0.52704300  | -1.18746800 | 1.00813200  |
| H | 1.31449900  | 1.05162800  | -0.98853300 |
| F | 2.64545800  | -0.10512200 | 0.01546900  |
| O | -1.93800800 | -1.00519500 | -0.15899400 |
| H | -1.44860500 | -1.79452300 | -0.43831400 |

**Transition state**

|   |             |             |             |
|---|-------------|-------------|-------------|
| C | -0.14360500 | -0.88528900 | -0.09993500 |
| C | 0.96665400  | -0.06372600 | -0.09541000 |
| C | 0.51272900  | 1.28595900  | -0.11863900 |
| H | 1.05907300  | 2.07262200  | 0.41452200  |
| H | -0.05716700 | 1.63307200  | -0.97229900 |

|   |             |             |             |
|---|-------------|-------------|-------------|
| C | -1.13654800 | -0.00060900 | 0.37366000  |
| H | -0.27239300 | -1.91379900 | -0.42175500 |
| H | -1.18588900 | 0.41161700  | 1.37345600  |
| F | -2.40055300 | -0.06855500 | -0.14774800 |
| O | 2.25057300  | -0.47979600 | 0.09119100  |
| H | 2.86138600  | 0.23383900  | -0.15178300 |

### Cyclobutene (Starting material)

|   |             |             |             |
|---|-------------|-------------|-------------|
| C | -0.81532200 | -0.67167200 | 0.00001200  |
| C | -0.81532600 | 0.67166900  | -0.00010500 |
| C | 0.70047000  | 0.78701300  | -0.00002400 |
| H | 1.14629000  | 1.24745900  | 0.89076000  |
| H | 1.14639900  | 1.24731500  | -0.89082800 |
| C | 0.70047300  | -0.78701000 | 0.00010400  |
| H | -1.60357700 | -1.42097900 | 0.00003300  |
| H | 1.09317364  | -1.21074619 | -0.90052570 |
| F | 1.19581255  | -1.32144560 | 1.13655344  |
| O | -1.86414998 | 1.64371233  | -0.00025266 |
| H | -1.48361185 | 2.52506964  | -0.00038655 |

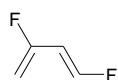

### Butadiene (Product)

|   |             |             |             |
|---|-------------|-------------|-------------|
| C | -0.34306300 | -0.40669800 | -0.25157800 |
| C | 1.04149600  | 0.02237800  | -0.06143900 |
| C | 1.56536400  | 1.24864800  | -0.10121300 |
| H | 2.61867600  | 1.41021500  | 0.09970200  |
| H | 0.94674500  | 2.10226700  | -0.35149700 |
| C | -1.37905000 | 0.29175100  | 0.21319100  |
| H | -0.51481700 | -1.34528500 | -0.77324300 |
| H | -1.33507200 | 1.20343600  | 0.79966000  |
| F | -2.65078100 | -0.10366600 | -0.01583500 |
| F | 1.87033500  | -1.04156800 | 0.17490300  |

**Transition state**

|   |             |             |             |
|---|-------------|-------------|-------------|
| C | -0.12009000 | -0.90071600 | -0.09191000 |
| C | 0.95699400  | -0.04797800 | -0.10688100 |
| C | 0.52086200  | 1.29438800  | -0.12518400 |
| H | 1.07337700  | 2.07223600  | 0.40762700  |
| H | -0.07337100 | 1.64265000  | -0.96144000 |
| C | -1.11593200 | -0.01434700 | 0.38032800  |
| H | -0.23682200 | -1.92792400 | -0.42054100 |
| H | -1.15533300 | 0.39385200  | 1.38205800  |
| F | -2.37220100 | -0.06673500 | -0.14783100 |
| F | 2.25455100  | -0.39647500 | 0.06496100  |

**Cyclobutene (Starting material)**

|   |             |             |             |
|---|-------------|-------------|-------------|
| C | 0.06667200  | -1.04850000 | 0.18442000  |
| C | 0.94247100  | -0.05888300 | -0.01749000 |
| C | 0.00244100  | 1.10483700  | 0.13581100  |
| H | -0.22866300 | 1.65925900  | -0.77874700 |
| H | 0.20792200  | 1.80103600  | 0.95712400  |
| C | -1.02861400 | -0.03814200 | 0.43431600  |
| H | 0.10217600  | -2.12989500 | 0.21589200  |
| H | -1.47022300 | -0.02288400 | 1.43476200  |
| F | -2.09872600 | -0.07888500 | -0.47288900 |
| F | 2.26438800  | -0.03926900 | -0.22170800 |

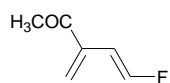**Butadiene (Product)**

|   |             |             |             |
|---|-------------|-------------|-------------|
| C | -1.00143500 | -0.25068200 | -0.25288800 |
| C | 0.29127400  | 0.44606200  | -0.13368900 |
| C | 0.42636600  | 1.78680200  | -0.18688200 |
| H | 1.38593600  | 2.27641700  | -0.05950400 |
| H | -0.42386800 | 2.43687700  | -0.37375900 |
| C | -2.14156700 | 0.24148600  | 0.22948000  |
| H | -1.00187700 | -1.23655900 | -0.70873600 |
| H | -2.27380700 | 1.16545700  | 0.78336700  |



|   |             |             |             |
|---|-------------|-------------|-------------|
| F | -3.31447500 | -0.42205300 | 0.08302700  |
| C | 1.49478300  | -0.45248900 | 0.00715300  |
| C | 2.86990100  | 0.15655400  | 0.22164800  |
| H | 3.59186400  | -0.65403800 | 0.33795200  |
| H | 3.16432100  | 0.77740500  | -0.63295900 |
| H | 2.89067600  | 0.79120200  | 1.11535100  |
| O | 1.35763700  | -1.66558500 | -0.06473600 |

**Transition state**

|   |             |             |             |
|---|-------------|-------------|-------------|
| C | -0.78158200 | -0.76896900 | -0.17662900 |
| C | 0.21365400  | 0.20779800  | -0.21015100 |
| C | -0.48995800 | 1.44807100  | -0.23166300 |
| H | -0.11517400 | 2.32928200  | 0.29306300  |
| H | -1.15839800 | 1.65569700  | -1.05879000 |
| C | -1.87122700 | -0.06103900 | 0.36953400  |
| H | -0.79816500 | -1.79403100 | -0.53918700 |
| H | -1.86659600 | 0.35310400  | 1.37056800  |
| F | -3.14889200 | -0.35670600 | -0.00929800 |
| C | 1.67807300  | 0.06410400  | -0.00011700 |
| C | 2.25769800  | -1.33809800 | 0.01546000  |
| H | 3.34771400  | -1.28126000 | -0.02189700 |
| H | 1.95763500  | -1.86065400 | 0.93271200  |
| H | 1.88857500  | -1.92985700 | -0.83142300 |
| O | 2.38056200  | 1.05335900  | 0.16750300  |

**Cyclobutene (Starting material)**

|   |             |             |             |
|---|-------------|-------------|-------------|
| C | -0.66803600 | -0.98701100 | 0.22758200  |
| C | 0.18807300  | 0.04619100  | 0.06782300  |
| C | -0.89354800 | 1.11853100  | 0.10548800  |
| H | -1.09833000 | 1.59356100  | -0.85826900 |
| H | -0.80513100 | 1.88658200  | 0.88125100  |
| C | -1.85711800 | -0.07394300 | 0.40437300  |
| H | -0.56345100 | -2.06725100 | 0.27340200  |
| H | -2.31108100 | -0.07048400 | 1.40113000  |
| F | -2.90081200 | -0.24781900 | -0.51303100 |
| C | 1.66023200  | 0.16687200  | -0.04421500 |
| C | 2.47828800  | -1.10869300 | -0.09452900 |

|   |            |             |             |
|---|------------|-------------|-------------|
| H | 2.17125800 | -1.73002700 | -0.94522000 |
| H | 3.53734700 | -0.85937300 | -0.18905700 |
| H | 2.32294700 | -1.70276800 | 0.81477700  |
| O | 2.17580000 | 1.27605600  | -0.09498400 |

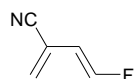

### Butadiene (Product)

|   |             |             |             |
|---|-------------|-------------|-------------|
| C | 0.57282400  | -0.31175000 | 0.31609300  |
| C | -0.70975900 | 0.39080800  | 0.10823100  |
| C | -0.86085200 | 1.73000800  | 0.06572100  |
| H | -1.82630300 | 2.18435200  | -0.13112900 |
| H | -0.01782900 | 2.39111900  | 0.24069500  |
| C | 1.70896200  | 0.09642900  | -0.24952500 |
| H | 0.57650300  | -1.21139600 | 0.92668700  |
| H | 1.82939600  | 0.92808900  | -0.93614800 |
| F | 2.87616200  | -0.54149600 | -0.01620700 |
| C | -1.86823700 | -0.45474300 | -0.04690500 |
| N | -2.78640800 | -1.16045900 | -0.15942000 |

### Transition state

|   |             |             |             |
|---|-------------|-------------|-------------|
| C | -0.41331900 | -0.82239000 | -0.18076700 |
| C | 0.63066500  | 0.09636600  | -0.15885200 |
| C | 0.00844900  | 1.38208200  | -0.14546700 |
| H | 0.43232100  | 2.22293500  | 0.40817500  |
| H | -0.62424200 | 1.65632000  | -0.98073500 |
| C | -1.47171600 | -0.06744900 | 0.36883000  |
| H | -0.46415800 | -1.83263800 | -0.57662800 |
| H | -1.46662900 | 0.30471000  | 1.38625100  |
| F | -2.74784400 | -0.26535700 | -0.05595600 |
| C | 2.02654900  | -0.16150700 | 0.00632100  |
| N | 3.16707600  | -0.36081900 | 0.13230700  |

### Cyclobutene (Starting material)

|   |             |             |            |
|---|-------------|-------------|------------|
| C | -0.30988300 | -1.02020900 | 0.19240200 |
|---|-------------|-------------|------------|

|   |             |             |             |
|---|-------------|-------------|-------------|
| C | 0.61164300  | -0.04540800 | 0.04889300  |
| C | -0.39425400 | 1.10299100  | 0.12693500  |
| H | -0.57267300 | 1.61407800  | -0.82329100 |
| H | -0.24377900 | 1.83753000  | 0.92542700  |
| C | -1.43226100 | -0.03240000 | 0.40352900  |
| H | -0.26519600 | -2.10410900 | 0.20712800  |
| H | -1.87759800 | -0.02295900 | 1.40353300  |
| F | -2.48553400 | -0.10475500 | -0.51052200 |
| C | 2.02780900  | -0.04889700 | -0.07816200 |
| N | 3.18724800  | -0.01688600 | -0.18281100 |

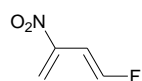

### Butadiene (Product)

|   |             |             |             |
|---|-------------|-------------|-------------|
| C | 0.91209900  | -0.22496800 | 0.31038500  |
| C | -0.35654100 | 0.48586900  | 0.14496500  |
| C | -0.56696400 | 1.80721000  | 0.15037600  |
| H | -1.55417700 | 2.21666100  | -0.02726500 |
| H | 0.25330700  | 2.48945200  | 0.34517700  |
| C | 2.03468700  | 0.21790300  | -0.25685300 |
| H | 0.92887700  | -1.14075600 | 0.89204900  |
| H | 2.13541400  | 1.07138400  | -0.91984500 |
| F | 3.21312600  | -0.40659000 | -0.05507600 |
| N | -1.54969600 | -0.39861800 | -0.03737700 |
| O | -1.34980100 | -1.61211000 | 0.01425500  |
| O | -2.64687000 | 0.12421100  | -0.21750800 |

### Transition state

|   |             |             |             |
|---|-------------|-------------|-------------|
| C | -0.75847700 | -0.82326000 | -0.11340100 |
| C | 0.24748800  | 0.11911500  | -0.17852200 |
| C | -0.34369700 | 1.40574800  | -0.23660900 |
| H | 0.08387100  | 2.26111500  | 0.28712200  |
| H | -0.97759500 | 1.64441000  | -1.08254000 |
| C | -1.81370100 | -0.02028600 | 0.37639100  |
| H | -0.79885900 | -1.85667900 | -0.43996700 |
| H | -1.80636600 | 0.42658900  | 1.36351700  |

|   |             |             |             |
|---|-------------|-------------|-------------|
| F | -3.08510100 | -0.21895400 | -0.05059900 |
| N | 1.67076800  | -0.13226900 | 0.00740500  |
| O | 2.04497400  | -1.30659000 | -0.01395300 |
| O | 2.40250200  | 0.84823100  | 0.16248600  |

### Cyclobutene (Starting material)

|   |             |             |             |
|---|-------------|-------------|-------------|
| C | -0.64631000 | -1.02248400 | 0.21752600  |
| C | 0.22913700  | -0.02019300 | 0.06586800  |
| C | -0.75388900 | 1.12199300  | 0.13240500  |
| H | -0.93635500 | 1.63277900  | -0.81671300 |
| H | -0.61179200 | 1.85428300  | 0.93282100  |
| C | -1.77931600 | -0.03235700 | 0.40780500  |
| H | -0.57976400 | -2.10325700 | 0.24380900  |
| H | -2.23052100 | -0.02151400 | 1.40466900  |
| F | -2.81552400 | -0.12997600 | -0.51809300 |
| N | 1.67207700  | -0.02407000 | -0.05537600 |
| O | 2.23904000  | -1.11657400 | -0.10519700 |
| O | 2.22294400  | 1.07835200  | -0.10177000 |

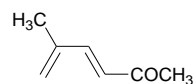

### Butadiene (Product)

|   |             |             |             |
|---|-------------|-------------|-------------|
| C | 0.48011800  | 0.28529000  | 0.10281300  |
| C | 1.90849800  | -0.07681600 | 0.05126200  |
| C | 2.34500800  | -1.31344300 | 0.35163700  |
| H | 3.40147700  | -1.56503100 | 0.30756500  |
| H | 1.66733700  | -2.10132100 | 0.66822100  |
| C | -0.55919500 | -0.53704400 | -0.14995500 |
| H | 0.27527800  | 1.32932400  | 0.34345800  |
| H | -0.39350100 | -1.56999700 | -0.44902900 |
| C | -1.98871200 | -0.15785100 | -0.06707400 |
| O | -2.84970400 | -1.00165600 | -0.29722200 |
| C | -2.37857900 | 1.26571300  | 0.30101300  |
| H | -1.99835900 | 1.53494000  | 1.29398800  |
| H | -1.96720800 | 1.98634200  | -0.41646200 |
| H | -3.46777600 | 1.34260900  | 0.30148700  |

|   |            |            |             |
|---|------------|------------|-------------|
| C | 2.85693100 | 1.04059700 | -0.32401500 |
| H | 2.63420900 | 1.42913800 | -1.32662000 |
| H | 2.76386400 | 1.88465300 | 0.37308900  |
| H | 3.89789900 | 0.70392400 | -0.31201100 |

**Transition state**

|   |             |             |             |
|---|-------------|-------------|-------------|
| C | -0.71166400 | -0.75965500 | -0.33047300 |
| C | -1.79545400 | -0.00097600 | 0.04153900  |
| C | -1.21820200 | 1.18695900  | 0.60989600  |
| H | -1.67680600 | 2.17460200  | 0.47984300  |
| H | -0.59427900 | 1.10380000  | 1.49222400  |
| C | 0.38880600  | 0.16373700  | -0.41835800 |
| H | -0.64401600 | -1.83340800 | -0.49094600 |
| H | 0.32368200  | 0.97366100  | -1.14027300 |
| C | 1.76336600  | -0.20439800 | 0.01041800  |
| O | 1.97853000  | -1.26686100 | 0.58697000  |
| C | 2.88239000  | 0.77603300  | -0.29414600 |
| H | 3.05618000  | 0.82119100  | -1.37789300 |
| H | 2.61512700  | 1.78984400  | 0.02971000  |
| H | 3.80264000  | 0.45969000  | 0.20203200  |
| C | -3.26644000 | -0.24048100 | -0.15892000 |
| H | -3.80870700 | -0.28362000 | 0.79379800  |
| H | -3.71256200 | 0.57672300  | -0.74388100 |
| H | -3.44631800 | -1.17491600 | -0.70010500 |

**Cyclobutene (Starting material)**

|   |             |             |             |
|---|-------------|-------------|-------------|
| C | -0.74934500 | 0.07155600  | 1.07346300  |
| C | -1.63461400 | -0.05218500 | 0.06807000  |
| C | -0.67978600 | -0.84838200 | -0.80942000 |
| H | -0.37608700 | -0.37139800 | -1.75059300 |
| H | -0.96755900 | -1.88515400 | -1.02322000 |
| C | 0.35692000  | -0.71530900 | 0.38325700  |
| H | -0.79468300 | 0.54067600  | 2.05431400  |
| H | 0.60868200  | -1.67922000 | 0.83901000  |
| C | 1.66349700  | -0.02237500 | 0.02620100  |
| O | 2.71300300  | -0.64676500 | 0.01431500  |
| C | 1.62573000  | 1.45750800  | -0.31196000 |

|   |             |             |             |
|---|-------------|-------------|-------------|
| H | 0.74732500  | 1.72143700  | -0.91107000 |
| H | 1.55914700  | 2.03715500  | 0.61853000  |
| H | 2.54259000  | 1.73914400  | -0.83500200 |
| C | -3.04366100 | 0.37752100  | -0.16398400 |
| H | -3.12342800 | 1.00646600  | -1.06149500 |
| H | -3.69800100 | -0.49012600 | -0.32661500 |
| H | -3.43445900 | 0.94513700  | 0.68785400  |

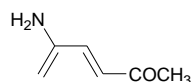

### Butadiene (Product)

|   |             |             |             |
|---|-------------|-------------|-------------|
| C | 0.48831100  | 0.31712400  | 0.09928600  |
| C | 1.91905900  | -0.03363000 | 0.04086300  |
| C | 2.38596500  | -1.25400400 | 0.38188300  |
| H | 3.44492400  | -1.49360800 | 0.32958600  |
| H | 1.72251800  | -2.01619000 | 0.77232000  |
| C | -0.53170500 | -0.52105500 | -0.17151500 |
| H | 0.28071100  | 1.35163800  | 0.37299400  |
| H | -0.34228600 | -1.54276000 | -0.49332200 |
| C | -1.96941500 | -0.17346900 | -0.07200100 |
| O | -2.81270000 | -1.02669400 | -0.32917900 |
| C | -2.38530600 | 1.22799200  | 0.34660000  |
| H | -2.00982500 | 1.46670700  | 1.34909900  |
| H | -1.98623100 | 1.98206900  | -0.34293300 |
| H | -3.47566900 | 1.28562100  | 0.34854800  |
| N | 2.75375000  | 1.05165000  | -0.28430500 |
| H | 2.42119600  | 1.63528700  | -1.04510200 |
| H | 3.72855300  | 0.80548300  | -0.41831900 |

### Transition state

|   |             |             |             |
|---|-------------|-------------|-------------|
| C | -0.72374700 | -0.79461300 | -0.34492900 |
| C | -1.79934100 | -0.01944000 | 0.03147400  |
| C | -1.22858800 | 1.18270900  | 0.58402200  |
| H | -1.71224600 | 2.15762600  | 0.44060600  |
| H | -0.64284800 | 1.10717200  | 1.49312000  |
| C | 0.35693700  | 0.15051500  | -0.44033400 |

|   |             |             |             |
|---|-------------|-------------|-------------|
| H | -0.65153600 | -1.87041700 | -0.47548000 |
| H | 0.31184300  | 0.94453900  | -1.18169200 |
| C | 1.73288300  | -0.19749200 | 0.01829800  |
| O | 1.94973700  | -1.23781200 | 0.63081200  |
| C | 2.84724300  | 0.78217400  | -0.30576400 |
| H | 3.01880200  | 0.81032300  | -1.39043400 |
| H | 2.57393200  | 1.79985400  | 0.00077500  |
| H | 3.76976200  | 0.48003300  | 0.19501300  |
| N | -3.15852400 | -0.26818300 | -0.09804300 |
| H | -3.79179500 | 0.43864600  | 0.25178800  |
| H | -3.47646600 | -0.71112100 | -0.95048800 |

### Cyclobutene (Starting material)

|   |             |             |             |
|---|-------------|-------------|-------------|
| C | -0.76325800 | 0.08094000  | 1.09782800  |
| C | -1.64212900 | -0.03675600 | 0.07768400  |
| C | -0.70969300 | -0.83841600 | -0.80162000 |
| H | -0.40495900 | -0.35825300 | -1.74022900 |
| H | -1.01026500 | -1.87176500 | -1.01455000 |
| C | 0.32651300  | -0.71775500 | 0.39308600  |
| H | -0.79518000 | 0.55514500  | 2.07426700  |
| H | 0.58328400  | -1.68746400 | 0.83502900  |
| C | 1.63256000  | -0.02891200 | 0.02142900  |
| O | 2.68464700  | -0.65009800 | 0.02657200  |
| C | 1.59486900  | 1.44588400  | -0.34040900 |
| H | 0.68732500  | 1.71781000  | -0.88967400 |
| H | 1.59389200  | 2.03889300  | 0.58386800  |
| H | 2.48576200  | 1.70493700  | -0.91769400 |
| N | -2.90613800 | 0.43319000  | -0.21836000 |
| H | -3.44823400 | -0.12454600 | -0.86738500 |
| H | -3.45900900 | 0.76378400  | 0.56432600  |

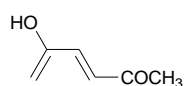

### Butadiene (Product)

|   |            |             |            |
|---|------------|-------------|------------|
| C | 0.49774500 | 0.32405000  | 0.09221400 |
| C | 1.92524200 | -0.02187800 | 0.03537400 |

|   |             |             |             |
|---|-------------|-------------|-------------|
| C | 2.44442400  | -1.21011800 | 0.38390200  |
| H | 3.51281400  | -1.38700900 | 0.32011800  |
| H | 1.81068300  | -1.99883000 | 0.77018600  |
| C | -0.51866700 | -0.52155800 | -0.17059800 |
| H | 0.28107800  | 1.35790700  | 0.36630500  |
| H | -0.32208100 | -1.54386900 | -0.48619000 |
| C | -1.95999900 | -0.18508400 | -0.06656500 |
| O | -2.79409700 | -1.04976500 | -0.31157200 |
| C | -2.38606100 | 1.21602800  | 0.34061900  |
| H | -2.01280800 | 1.46541800  | 1.34143200  |
| H | -1.99375500 | 1.96768700  | -0.35553400 |
| H | -3.47675200 | 1.26547800  | 0.34267500  |
| O | 2.77920700  | 0.99954800  | -0.33076700 |
| H | 2.30385000  | 1.66631500  | -0.84995500 |

**Transition state**

|   |             |             |             |
|---|-------------|-------------|-------------|
| C | -0.73215300 | -0.79347800 | -0.39789700 |
| C | -1.79311900 | -0.02859600 | 0.00871900  |
| C | -1.25849600 | 1.16976400  | 0.58943700  |
| H | -1.75675800 | 2.13749000  | 0.45594800  |
| H | -0.65726200 | 1.09330200  | 1.48797600  |
| C | 0.34765000  | 0.15612900  | -0.45363100 |
| H | -0.66688900 | -1.86345400 | -0.56455300 |
| H | 0.30032200  | 0.96954800  | -1.17254100 |
| C | 1.71665300  | -0.19356800 | 0.02611700  |
| O | 1.91604900  | -1.23370700 | 0.64374200  |
| C | 2.83809300  | 0.78067700  | -0.28391600 |
| H | 3.01882900  | 0.81319500  | -1.36688600 |
| H | 2.56728300  | 1.79834600  | 0.02502800  |
| H | 3.75444000  | 0.47149500  | 0.22360100  |
| O | -3.11792700 | -0.28805100 | -0.20078000 |
| H | -3.65672100 | 0.20856600  | 0.43476200  |

**Cyclobutene (Starting material)**

|   |             |             |             |
|---|-------------|-------------|-------------|
| C | -0.77973800 | 0.13142900  | 1.09672100  |
| C | -1.64293600 | -0.01052700 | 0.07822600  |
| C | -0.73265700 | -0.84015300 | -0.79568800 |



|   |             |             |             |
|---|-------------|-------------|-------------|
| H | -0.41629400 | -0.38515400 | -1.74335400 |
| H | -1.04262900 | -1.87555700 | -0.98215000 |
| C | 0.29807900  | -0.69756400 | 0.40375200  |
| H | -0.81830100 | 0.61609200  | 2.06569200  |
| H | 0.53214000  | -1.66217600 | 0.86746700  |
| C | 1.61765500  | -0.03877900 | 0.02202800  |
| O | 2.65196400  | -0.68761500 | 0.02195400  |
| C | 1.61117900  | 1.43407600  | -0.34534200 |
| H | 0.72246300  | 1.71519500  | -0.92069500 |
| H | 1.59093800  | 2.03235200  | 0.57524000  |
| H | 2.51986400  | 1.67827900  | -0.90054700 |
| O | -2.91165100 | 0.42396300  | -0.11504900 |
| H | -3.24016800 | 0.11929900  | -0.97507400 |

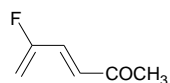

### Butadiene (Product)

|   |             |             |             |
|---|-------------|-------------|-------------|
| C | 0.48973700  | 0.31319100  | 0.02473000  |
| C | 1.91075900  | -0.02229000 | 0.01174800  |
| C | 2.51874500  | -1.20663300 | 0.12068000  |
| H | 3.59991900  | -1.28008200 | 0.09220300  |
| H | 1.94113600  | -2.11475300 | 0.24589700  |
| C | -0.53138600 | -0.56283300 | -0.05671600 |
| H | 0.29029700  | 1.37958400  | 0.10254000  |
| H | -0.35572700 | -1.63146000 | -0.15955700 |
| C | -1.96814900 | -0.19463500 | -0.01908700 |
| O | -2.81093600 | -1.08270200 | -0.08616900 |
| C | -2.37548500 | 1.26398800  | 0.10069300  |
| H | -1.99589000 | 1.70417400  | 1.03101500  |
| H | -1.97616300 | 1.85609800  | -0.73178900 |
| H | -3.46545400 | 1.32581400  | 0.09458000  |
| F | 2.68711600  | 1.09750100  | -0.11975900 |

### Transition state

|   |             |             |             |
|---|-------------|-------------|-------------|
| C | -0.74603600 | -0.79703200 | -0.40797400 |
| C | -1.77782200 | -0.01746700 | 0.02050300  |

|   |             |             |             |
|---|-------------|-------------|-------------|
| C | -1.27357900 | 1.17987000  | 0.60042900  |
| H | -1.78874900 | 2.13542700  | 0.47032700  |
| H | -0.64494600 | 1.11211000  | 1.48015200  |
| C | 0.33448800  | 0.15351400  | -0.46462100 |
| H | -0.68766400 | -1.86827900 | -0.56572200 |
| H | 0.27848200  | 0.96705000  | -1.18199900 |
| C | 1.70099500  | -0.19450500 | 0.02348000  |
| O | 1.89157300  | -1.23620700 | 0.64023700  |
| C | 2.82384600  | 0.77818100  | -0.28045100 |
| H | 3.00670900  | 0.81524200  | -1.36286700 |
| H | 2.55452600  | 1.79490800  | 0.03280300  |
| H | 3.73834800  | 0.46482200  | 0.22757700  |
| F | -3.10673800 | -0.23855500 | -0.13004000 |

### Cyclobutene (Starting material)

|   |             |             |             |
|---|-------------|-------------|-------------|
| C | -0.80084000 | 0.12952000  | 1.08707800  |
| C | -1.63121400 | -0.01633500 | 0.05272600  |
| C | -0.73931000 | -0.83932900 | -0.82604400 |
| H | -0.41899200 | -0.37804000 | -1.76713200 |
| H | -1.05780100 | -1.86942800 | -1.01738900 |
| C | 0.27970200  | -0.70137300 | 0.38892700  |
| H | -0.84984100 | 0.60980200  | 2.05702800  |
| H | 0.49993600  | -1.66618000 | 0.85661300  |
| C | 1.60463000  | -0.03876600 | 0.03082100  |
| O | 2.63650400  | -0.68921300 | 0.05050500  |
| C | 1.60199700  | 1.43277600  | -0.33903900 |
| H | 0.73490300  | 1.70647800  | -0.95011800 |
| H | 1.54449900  | 2.03430200  | 0.57797100  |
| H | 2.52860100  | 1.68089600  | -0.86156100 |
| F | -2.88479200 | 0.39965700  | -0.18514100 |

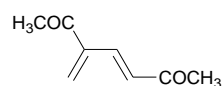

### Butadiene (Product)

|   |             |             |            |
|---|-------------|-------------|------------|
| C | 0.20684000  | -0.03705500 | 0.13415700 |
| C | -1.15921800 | 0.51558300  | 0.11777600 |

|   |             |             |             |
|---|-------------|-------------|-------------|
| C | -1.43704000 | 1.82399500  | 0.28905500  |
| H | -2.45143500 | 2.20719500  | 0.26581600  |
| H | -0.65315900 | 2.55299100  | 0.47395900  |
| C | 1.33716000  | 0.65217400  | -0.11553900 |
| H | 0.25524800  | -1.10296900 | 0.33912300  |
| H | 1.31646400  | 1.70780300  | -0.38081200 |
| C | 2.70571100  | 0.07992800  | -0.07617500 |
| O | 3.66505000  | 0.81234400  | -0.29648000 |
| C | 2.90296000  | -1.39390500 | 0.23431200  |
| H | 2.51585600  | -1.64095200 | 1.23039300  |
| H | 2.37155100  | -2.02443900 | -0.48864400 |
| H | 3.97012700  | -1.62179100 | 0.19712500  |
| C | -2.26517000 | -0.49741900 | -0.05637600 |
| C | -3.70414800 | -0.02824600 | -0.17683800 |
| H | -3.82683900 | 0.67746500  | -1.00676000 |
| H | -4.33874000 | -0.89997700 | -0.34735300 |
| H | -4.03185100 | 0.47723300  | 0.73963700  |
| O | -1.99627500 | -1.69020600 | -0.09410900 |

#### Transition state

|   |             |             |             |
|---|-------------|-------------|-------------|
| C | -0.01519200 | 0.69580200  | 0.08075600  |
| C | -1.03982200 | -0.19878900 | -0.16836700 |
| C | -0.37432400 | -1.43443400 | -0.47559100 |
| H | -0.75407100 | -2.39927200 | -0.13229900 |
| H | 0.27009000  | -1.47650700 | -1.34576800 |
| C | 1.11719600  | -0.12380400 | 0.39105300  |
| H | 0.00381800  | 1.77900300  | -0.00971600 |
| H | 1.03394200  | -0.80331900 | 1.23628000  |
| C | 2.50034800  | 0.24734500  | -0.01701700 |
| O | 2.69411000  | 1.22200300  | -0.73578700 |
| C | 3.63941400  | -0.61467400 | 0.49172700  |
| H | 3.72961300  | -0.51439100 | 1.58180300  |
| H | 3.44998300  | -1.67519200 | 0.28260000  |
| H | 4.57758600  | -0.30820600 | 0.02423700  |
| C | -2.50545300 | -0.06093600 | 0.00454200  |
| C | -3.05791300 | 1.31964800  | 0.30570100  |
| H | -2.63713500 | 2.07311800  | -0.37122800 |
| H | -4.14570800 | 1.30310800  | 0.20934300  |

|   |             |             |             |
|---|-------------|-------------|-------------|
| H | -2.79442000 | 1.61718900  | 1.32876200  |
| O | -3.23401300 | -1.04406300 | -0.07431700 |

**Cyclobutene (Starting material)**

|   |             |             |             |
|---|-------------|-------------|-------------|
| C | 0.03967900  | 0.60803800  | -0.88498400 |
| C | 0.90044600  | -0.18765100 | -0.21383600 |
| C | -0.12509100 | -1.27650300 | 0.04164000  |
| H | -0.37971600 | -1.45510300 | 1.09184800  |
| H | 0.06874300  | -2.23936600 | -0.44135600 |
| C | -1.13449300 | -0.34866000 | -0.76047500 |
| H | 0.13232500  | 1.57786700  | -1.36888000 |
| H | -1.46848400 | -0.79254400 | -1.70431100 |
| C | -2.37803400 | 0.08419100  | 0.01077600  |
| O | -3.47567600 | -0.33853100 | -0.31011500 |
| C | -2.20409800 | 1.03870100  | 1.17693700  |
| H | -1.32851000 | 0.78796000  | 1.78619800  |
| H | -2.04396700 | 2.05464800  | 0.79093200  |
| H | -3.10616000 | 1.03648400  | 1.79283800  |
| C | 2.32865800  | -0.10424200 | 0.15524100  |
| C | 3.11420700  | 1.11277100  | -0.29614800 |
| H | 4.11918300  | 1.07608000  | 0.12993800  |
| H | 3.18770900  | 1.13130800  | -1.39113700 |
| H | 2.61680600  | 2.04027500  | 0.01256200  |
| O | 2.84497900  | -1.00865300 | 0.80092400  |

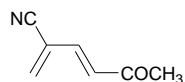**Butadiene (Product)**

|   |             |             |             |
|---|-------------|-------------|-------------|
| C | -0.24565100 | -0.13221000 | 0.13305400  |
| C | -1.61979900 | 0.41015700  | 0.10038200  |
| C | -1.94915100 | 1.70588400  | 0.28218700  |
| H | -2.98078700 | 2.03815700  | 0.23561000  |
| H | -1.19000900 | 2.45171300  | 0.49533700  |
| C | 0.86833700  | 0.57083300  | -0.14455200 |
| H | -0.17045500 | -1.18700700 | 0.38833300  |
| H | 0.81735400  | 1.61263800  | -0.45431500 |

|   |             |             |             |
|---|-------------|-------------|-------------|
| C | 2.25365800  | 0.03513000  | -0.07703200 |
| O | 3.18915800  | 0.78739500  | -0.32206800 |
| C | 2.48874200  | -1.41881000 | 0.29090400  |
| H | 2.10454700  | -1.63786600 | 1.29477200  |
| H | 1.98073100  | -2.09127000 | -0.41112100 |
| H | 3.56173000  | -1.61872300 | 0.26725500  |
| C | -2.66701300 | -0.55750500 | -0.11785600 |
| N | -3.48730100 | -1.36395300 | -0.29169300 |

**Transition state**

|   |             |             |             |
|---|-------------|-------------|-------------|
| C | -0.43580300 | -0.73955000 | -0.25909300 |
| C | -1.49117200 | 0.07200100  | 0.10781600  |
| C | -0.88106700 | 1.26006800  | 0.64147400  |
| H | -1.29874600 | 2.25580200  | 0.47306500  |
| H | -0.25890000 | 1.16637100  | 1.52310700  |
| C | 0.66891100  | 0.16124900  | -0.39522500 |
| H | -0.39455200 | -1.82121200 | -0.34660900 |
| H | 0.58232700  | 0.96183600  | -1.12590800 |
| C | 2.05631800  | -0.22924100 | -0.00687400 |
| O | 2.25583800  | -1.29154300 | 0.56970000  |
| C | 3.18008300  | 0.72398400  | -0.35841000 |
| H | 3.30041400  | 0.77642300  | -1.44895000 |
| H | 2.95286500  | 1.74042100  | -0.01254900 |
| H | 4.11500800  | 0.38134300  | 0.08975800  |
| C | -2.89274200 | -0.12384900 | -0.07963300 |
| N | -4.03889900 | -0.26808600 | -0.22997800 |

**Cyclobutene (Starting material)**

|   |             |             |             |
|---|-------------|-------------|-------------|
| C | -0.44542700 | -0.00162800 | 1.10882700  |
| C | -1.33968100 | -0.18670300 | 0.11648300  |
| C | -0.36480400 | -0.93561000 | -0.78210600 |
| H | -0.11813200 | -0.44178300 | -1.72828900 |
| H | -0.60801700 | -1.98484500 | -0.97667400 |
| C | 0.68105700  | -0.72563100 | 0.39198700  |
| H | -0.50754900 | 0.47345100  | 2.08376100  |
| H | 0.99389900  | -1.66603600 | 0.85752500  |
| C | 1.94519700  | 0.04074500  | 0.00188500  |

|   |             |             |             |
|---|-------------|-------------|-------------|
| O | 3.01038700  | -0.54594100 | -0.07252700 |
| C | 1.82496700  | 1.52266000  | -0.29290000 |
| H | 0.93643600  | 1.75143300  | -0.89243800 |
| H | 1.71946500  | 2.07268800  | 0.65212500  |
| H | 2.72516700  | 1.87133500  | -0.80356400 |
| C | -2.70719700 | 0.16148100  | -0.05282900 |
| N | -3.82700600 | 0.43420000  | -0.22290200 |

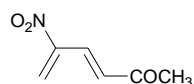

### Butadiene (Product)

|   |             |             |             |
|---|-------------|-------------|-------------|
| C | 0.13622500  | -0.04747600 | 0.14579500  |
| C | -1.20971000 | 0.52831200  | 0.12523200  |
| C | -1.56029400 | 1.80949800  | 0.29370200  |
| H | -2.59832400 | 2.11615400  | 0.25030200  |
| H | -0.80354900 | 2.56185200  | 0.48793600  |
| C | 1.25629900  | 0.64530100  | -0.13545000 |
| H | 0.18958800  | -1.10142900 | 0.39620100  |
| H | 1.22057200  | 1.68865400  | -0.44279000 |
| C | 2.63422400  | 0.08932500  | -0.07368700 |
| O | 3.57886400  | 0.82982200  | -0.31961800 |
| C | 2.84800900  | -1.36890200 | 0.28785600  |
| H | 2.47170600  | -1.58299200 | 1.29579300  |
| H | 2.31861500  | -2.03060500 | -0.40840000 |
| H | 3.91696500  | -1.58760700 | 0.25127300  |
| N | -2.31773900 | -0.45735500 | -0.08156300 |
| O | -3.46878400 | -0.03565900 | -0.15107100 |
| O | -2.00006900 | -1.64402500 | -0.16931800 |

### Transition state

|   |             |             |             |
|---|-------------|-------------|-------------|
| C | 0.03759300  | -0.75979500 | 0.18537700  |
| C | 1.05648200  | 0.10745200  | -0.11508000 |
| C | 0.48168800  | 1.35515400  | -0.50016000 |
| H | 0.90791900  | 2.31127500  | -0.19445700 |
| H | -0.14845800 | 1.38183300  | -1.38125400 |
| C | -1.06472700 | 0.12530000  | 0.41714100  |

|   |             |             |             |
|---|-------------|-------------|-------------|
| H | 0.00919200  | -1.84319600 | 0.14954100  |
| H | -0.97560100 | 0.84413200  | 1.22805100  |
| C | -2.45096600 | -0.20949700 | -0.02819000 |
| O | -2.64365900 | -1.18893400 | -0.73697600 |
| C | -3.57532500 | 0.69244700  | 0.43561700  |
| H | -3.68982000 | 0.62146300  | 1.52564700  |
| H | -3.35291000 | 1.74217000  | 0.20509900  |
| H | -4.51128800 | 0.39947700  | -0.04429600 |
| N | 2.48183400  | -0.11005600 | 0.04555700  |
| O | 2.86009600  | -1.25130600 | 0.31430900  |
| O | 3.21851900  | 0.87109800  | -0.09926500 |

### Cyclobutene (Starting material)

|   |             |             |             |
|---|-------------|-------------|-------------|
| C | 0.07179800  | 0.54596700  | -0.98489700 |
| C | 0.92958400  | -0.14436500 | -0.22190400 |
| C | -0.01858900 | -1.23503600 | 0.19012100  |
| H | -0.26025700 | -1.28627900 | 1.25629700  |
| H | 0.21275900  | -2.23901400 | -0.17658200 |
| C | -1.05908400 | -0.43948800 | -0.71540100 |
| H | 0.14958600  | 1.44650000  | -1.58371500 |
| H | -1.38053400 | -1.01067500 | -1.59186800 |
| C | -2.31228600 | 0.04315300  | 0.01777700  |
| O | -3.38469700 | -0.48571900 | -0.21128900 |
| C | -2.16856000 | 1.16885500  | 1.02181100  |
| H | -1.28019200 | 1.04651600  | 1.65200900  |
| H | -2.04897600 | 2.12009300  | 0.48545900  |
| H | -3.06539700 | 1.22609000  | 1.64226300  |
| N | 2.32199300  | 0.07284200  | 0.09263700  |
| O | 2.87164300  | 1.06644600  | -0.38808700 |
| O | 2.85829000  | -0.76168300 | 0.82720500  |

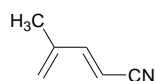

### Butadiene (Product)

|   |            |             |             |
|---|------------|-------------|-------------|
| C | 0.01431500 | -0.31588700 | -0.18807800 |
| C | 1.43259700 | 0.05682200  | -0.05381200 |

|   |             |             |             |
|---|-------------|-------------|-------------|
| C | 1.84244600  | 1.33651600  | -0.11806300 |
| H | 2.89192900  | 1.59864500  | -0.01333800 |
| H | 1.15157500  | 2.15455800  | -0.30272100 |
| C | -1.03349600 | 0.42322900  | 0.23496100  |
| H | -0.19056900 | -1.28562900 | -0.64188100 |
| H | -0.88579500 | 1.36918200  | 0.75093000  |
| C | -2.38737500 | 0.01082700  | 0.05242800  |
| N | -3.50077800 | -0.30585000 | -0.08164300 |
| C | 2.39871800  | -1.09390300 | 0.12045600  |
| H | 2.32978600  | -1.79348300 | -0.72354500 |
| H | 3.43209800  | -0.74099400 | 0.18545400  |
| H | 2.17319100  | -1.66695600 | 1.02923400  |

**Transition state**

|   |             |             |             |
|---|-------------|-------------|-------------|
| C | 0.21285300  | -0.83775300 | 0.00296700  |
| C | 1.32525500  | -0.03524500 | -0.09863100 |
| C | 0.79730600  | 1.30042700  | -0.12992400 |
| H | 1.31368300  | 2.13884600  | 0.35131300  |
| H | 0.13809000  | 1.59433800  | -0.93827900 |
| C | -0.82340500 | 0.02782900  | 0.50546500  |
| H | 0.08731400  | -1.88630200 | -0.26016800 |
| H | -0.70357300 | 0.47992600  | 1.48379100  |
| C | -2.18645800 | -0.06791900 | 0.07179800  |
| N | -3.28620200 | -0.11751200 | -0.31385500 |
| C | 2.78392600  | -0.39631700 | -0.06670700 |
| H | 3.28362300  | 0.10567300  | 0.77392400  |
| H | 2.92508100  | -1.47460600 | 0.05702000  |
| H | 3.30233300  | -0.08142200 | -0.98042800 |

**Cyclobutene (Starting material)**

|   |             |             |             |
|---|-------------|-------------|-------------|
| C | 0.35832000  | -0.97341800 | 0.40518100  |
| C | 1.26185800  | -0.06811800 | -0.00704000 |
| C | 0.32186500  | 1.11732200  | 0.16566300  |
| H | 0.02512900  | 1.62934700  | -0.75646600 |
| H | 0.61045700  | 1.86547300  | 0.91428800  |
| C | -0.73122000 | 0.05912400  | 0.68690600  |
| H | 0.36050400  | -2.05352000 | 0.52109500  |



|   |             |             |             |
|---|-------------|-------------|-------------|
| H | -0.98279100 | 0.18579100  | 1.74738500  |
| C | -1.97178700 | -0.05009200 | -0.08044800 |
| N | -2.95384400 | -0.14403700 | -0.69562400 |
| C | 2.67813200  | -0.12348600 | -0.46758200 |
| H | 3.32637600  | 0.48131700  | 0.18119300  |
| H | 3.05792300  | -1.15082800 | -0.47083200 |
| H | 2.77630400  | 0.28268700  | -1.48337700 |

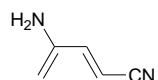

### Butadiene (Product)

|   |             |             |             |
|---|-------------|-------------|-------------|
| C | 0.02603800  | -0.33866200 | -0.20405800 |
| C | 1.44684400  | 0.01711000  | -0.04931900 |
| C | 1.88517500  | 1.29376100  | -0.10567000 |
| H | 2.93647600  | 1.54021000  | 0.01736000  |
| H | 1.20953300  | 2.10707500  | -0.34202700 |
| C | -1.00218600 | 0.40145500  | 0.25840700  |
| H | -0.18180400 | -1.27800000 | -0.71506600 |
| H | -0.82882000 | 1.31739200  | 0.81833800  |
| C | -2.36580600 | 0.03290700  | 0.05411900  |
| N | -3.48698900 | -0.24833600 | -0.09191200 |
| N | 2.29886100  | -1.09520900 | 0.03987900  |
| H | 1.97153000  | -1.84877700 | 0.63502400  |
| H | 3.26957800  | -0.87250500 | 0.22972500  |

### Transition state

|   |             |             |             |
|---|-------------|-------------|-------------|
| C | 0.22592200  | -0.86338800 | -0.00973100 |
| C | 1.33666700  | -0.04829000 | -0.10076700 |
| C | 0.83149400  | 1.29879500  | -0.09496900 |
| H | 1.38003000  | 2.10249000  | 0.40835600  |
| H | 0.20214700  | 1.62281400  | -0.91538000 |
| C | -0.78948600 | 0.00952300  | 0.51753700  |
| H | 0.09404100  | -1.90296800 | -0.29958200 |
| H | -0.68207200 | 0.43981200  | 1.50730900  |
| C | -2.15122300 | -0.05752300 | 0.06667800  |
| N | -3.24822500 | -0.08151700 | -0.32850100 |

|   |            |             |             |
|---|------------|-------------|-------------|
| N | 2.68367300 | -0.36178800 | -0.01753100 |
| H | 3.31720900 | 0.14847200  | -0.61955700 |
| H | 2.92025300 | -1.34218900 | 0.06858500  |

### Cyclobutene (Starting material)

|   |             |             |             |
|---|-------------|-------------|-------------|
| C | 0.37784600  | -1.02212000 | 0.33649700  |
| C | 1.27528000  | -0.08215700 | -0.03323200 |
| C | 0.35743800  | 1.09300300  | 0.22541200  |
| H | 0.05292000  | 1.66998700  | -0.65500700 |
| H | 0.66855700  | 1.77904300  | 1.02219400  |
| C | -0.69342800 | 0.00581000  | 0.68880700  |
| H | 0.37818200  | -2.10414200 | 0.40493400  |
| H | -0.94240200 | 0.08518300  | 1.75517300  |
| C | -1.94217900 | -0.03677800 | -0.07785500 |
| N | -2.92927700 | -0.07801200 | -0.69090200 |
| N | 2.60051900  | -0.05930800 | -0.40571000 |
| H | 2.89322400  | 0.72330700  | -0.97792000 |
| H | 3.00108700  | -0.93868300 | -0.71087000 |

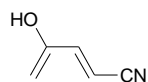

### Butadiene (Product)

|   |             |             |             |
|---|-------------|-------------|-------------|
| C | 0.03535900  | -0.34037500 | -0.20150500 |
| C | 1.45430800  | 0.00529300  | -0.04677200 |
| C | 1.95008600  | 1.25134900  | -0.11680800 |
| H | 3.01319300  | 1.43074400  | 0.00294600  |
| H | 1.30546600  | 2.09286000  | -0.33939700 |
| C | -0.98763300 | 0.40699300  | 0.26228400  |
| H | -0.18376000 | -1.27386200 | -0.72092300 |
| H | -0.80559400 | 1.31937900  | 0.82534700  |
| C | -2.35382500 | 0.05278400  | 0.05221000  |
| N | -3.47626900 | -0.21951400 | -0.09953900 |
| O | 2.32035200  | -1.05675100 | 0.09910700  |
| H | 1.85198800  | -1.83477700 | 0.43949000  |

**Transition state**

|   |             |             |             |
|---|-------------|-------------|-------------|
| C | 0.23825000  | -0.89493700 | 0.02442300  |
| C | 1.33173100  | -0.07439400 | -0.08864000 |
| C | 0.85328300  | 1.27731300  | -0.08901500 |
| H | 1.41347200  | 2.07782100  | 0.40746200  |
| H | 0.21436300  | 1.60991500  | -0.89866300 |
| C | -0.77179500 | -0.00301300 | 0.53360000  |
| H | 0.11110300  | -1.93606000 | -0.25450000 |
| H | -0.66493200 | 0.43290300  | 1.52068500  |
| C | -2.12682800 | -0.04309300 | 0.06244500  |
| N | -3.21734900 | -0.04309200 | -0.35021800 |
| O | 2.63770900  | -0.46123000 | -0.06709200 |
| H | 3.19792300  | 0.23564600  | -0.44360100 |

**Cyclobutene (Starting material)**

|   |             |             |             |
|---|-------------|-------------|-------------|
| C | 0.39601100  | -1.04044200 | 0.31372300  |
| C | 1.27762800  | -0.09447400 | -0.04567500 |
| C | 0.38103600  | 1.09197200  | 0.22841000  |
| H | 0.06774600  | 1.67459400  | -0.64507400 |
| H | 0.69588000  | 1.77087000  | 1.03034500  |
| C | -0.66453000 | -0.00474200 | 0.68747700  |
| H | 0.39403100  | -2.12228100 | 0.35550700  |
| H | -0.89857900 | 0.05769900  | 1.75757300  |
| C | -1.91964300 | -0.02828000 | -0.06752800 |
| N | -2.91528100 | -0.05285100 | -0.66696700 |
| O | 2.55529400  | -0.16013600 | -0.47868500 |
| H | 2.88252200  | 0.72596600  | -0.69853800 |

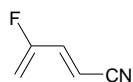**Butadiene (Product)**

|   |            |             |             |
|---|------------|-------------|-------------|
| C | 0.02812600 | -0.36786200 | -0.09675800 |
| C | 1.44024400 | -0.00582400 | -0.02752200 |
| C | 2.01845600 | 1.19669000  | -0.08547500 |
| H | 3.09584600 | 1.29791500  | -0.01973300 |

|   |             |             |             |
|---|-------------|-------------|-------------|
| H | 1.42245400  | 2.09249500  | -0.21439600 |
| C | -0.99902400 | 0.47147200  | 0.14945100  |
| H | -0.17230300 | -1.40363800 | -0.36034600 |
| H | -0.83291800 | 1.50048800  | 0.45954000  |
| C | -2.36086000 | 0.06704400  | 0.02723200  |
| N | -3.48202400 | -0.23597200 | -0.06281700 |
| F | 2.23327000  | -1.11162100 | 0.08589900  |

**Transition state**

|   |             |             |             |
|---|-------------|-------------|-------------|
| C | 0.25770300  | -0.90662100 | 0.03500000  |
| C | 1.32033400  | -0.06135900 | -0.09708600 |
| C | 0.86925500  | 1.28718900  | -0.10004600 |
| H | 1.44421100  | 2.07879300  | 0.38697700  |
| H | 0.20369500  | 1.61945000  | -0.88768000 |
| C | -0.75386700 | -0.01317100 | 0.54258300  |
| H | 0.13896800  | -1.94714600 | -0.24802300 |
| H | -0.63747300 | 0.42535400  | 1.52705200  |
| C | -2.10581000 | -0.04375800 | 0.06637500  |
| N | -3.19479900 | -0.04026400 | -0.34972400 |
| F | 2.63205700  | -0.38536400 | -0.11235700 |

**Cyclobutene (Starting material)**

|   |             |             |             |
|---|-------------|-------------|-------------|
| C | 0.41934000  | -1.02108300 | 0.34680200  |
| C | 1.26917600  | -0.07253400 | -0.05004000 |
| C | 0.39070500  | 1.12310000  | 0.17391800  |
| H | 0.07276400  | 1.66372000  | -0.72262200 |
| H | 0.71320300  | 1.83241600  | 0.94341800  |
| C | -0.64336100 | 0.03240000  | 0.68564000  |
| H | 0.42643500  | -2.10018000 | 0.42877000  |
| H | -0.86080200 | 0.12855100  | 1.75552200  |
| C | -1.90205900 | -0.03969600 | -0.05674500 |
| N | -2.90130900 | -0.10340100 | -0.64643100 |
| F | 2.52830700  | -0.10375800 | -0.49750200 |

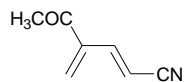

### Butadiene (Product)

|   |             |             |             |
|---|-------------|-------------|-------------|
| C | -0.67252800 | -0.11366500 | -0.16908000 |
| C | 0.67512800  | 0.47375100  | -0.09423000 |
| C | 0.91203500  | 1.79926700  | -0.16131200 |
| H | 1.91373900  | 2.20999100  | -0.09650500 |
| H | 0.10895200  | 2.51695700  | -0.30499700 |
| C | -1.80803800 | 0.51640700  | 0.19443600  |
| H | -0.71870900 | -1.14231800 | -0.51544500 |
| H | -1.79818000 | 1.52136000  | 0.61159700  |
| C | -3.09466300 | -0.09047200 | 0.07761000  |
| N | -4.15932600 | -0.55574200 | -0.00657600 |
| C | 1.80762400  | -0.52140600 | 0.00539500  |
| C | 3.23121600  | -0.02399900 | 0.17546700  |
| H | 3.88923600  | -0.88906200 | 0.27694000  |
| H | 3.54910300  | 0.56564000  | -0.69294400 |
| H | 3.32951900  | 0.61199600  | 1.06305800  |
| O | 1.56712300  | -1.71795800 | -0.05817300 |

### Transition state

|   |             |             |             |
|---|-------------|-------------|-------------|
| C | -0.47430600 | -0.71130300 | -0.02711000 |
| C | 0.55737600  | 0.20257800  | -0.13759900 |
| C | -0.09529600 | 1.48121400  | -0.17624400 |
| H | 0.31386800  | 2.35593500  | 0.33341000  |
| H | -0.77114100 | 1.69963000  | -0.99457500 |
| C | -1.57296400 | 0.05849000  | 0.48192600  |
| H | -0.51878400 | -1.75835100 | -0.31813300 |
| H | -1.46070100 | 0.54637000  | 1.44500300  |
| C | -2.93171700 | -0.16954700 | 0.08971000  |
| N | -4.03169100 | -0.33139400 | -0.26097100 |
| C | 2.02767400  | 0.01500500  | -0.03938400 |
| C | 2.56386200  | -1.40298400 | -0.01581800 |
| H | 3.64973900  | -1.38180900 | -0.12981400 |
| H | 2.31357000  | -1.88564600 | 0.93759600  |
| H | 2.12002500  | -2.00942200 | -0.81499500 |

|   |            |            |            |
|---|------------|------------|------------|
| O | 2.76593600 | 0.98904200 | 0.03942800 |
|---|------------|------------|------------|

**Cyclobutene (Starting material)**

|   |             |             |             |
|---|-------------|-------------|-------------|
| C | -0.37003900 | -0.89786700 | 0.50826400  |
| C | 0.50106100  | 0.07569900  | 0.17487500  |
| C | -0.52043100 | 1.19612500  | 0.25251100  |
| H | -0.76164200 | 1.67803000  | -0.69903000 |
| H | -0.34247800 | 1.96250800  | 1.01322300  |
| C | -1.54058000 | 0.06496000  | 0.68906700  |
| H | -0.30931400 | -1.97540800 | 0.62986700  |
| H | -1.87523600 | 0.16675700  | 1.72892600  |
| C | -2.70552000 | -0.14317300 | -0.16841000 |
| N | -3.62558300 | -0.31695000 | -0.85684100 |
| C | 1.94699600  | 0.11980900  | -0.14034500 |
| C | 2.70866800  | -1.18950700 | -0.18683800 |
| H | 2.30614200  | -1.83700400 | -0.97617300 |
| H | 3.76385300  | -0.99038700 | -0.38559000 |
| H | 2.60999300  | -1.73187000 | 0.76162300  |
| O | 2.48335400  | 1.19871800  | -0.35621300 |

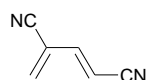**Butadiene (Product)**

|   |             |             |             |
|---|-------------|-------------|-------------|
| C | -0.22499600 | -0.20295000 | -0.19845500 |
| C | 1.12868600  | 0.37123700  | -0.07574500 |
| C | 1.41023800  | 1.69070000  | -0.08864400 |
| H | 2.42779400  | 2.05160900  | 0.01733900  |
| H | 0.62723600  | 2.42983900  | -0.22619800 |
| C | -1.34696700 | 0.40857400  | 0.23079200  |
| H | -0.29442300 | -1.19007700 | -0.64952000 |
| H | -1.31080000 | 1.36605100  | 0.74562000  |
| C | -2.64378500 | -0.16148500 | 0.05896700  |
| N | -3.71513300 | -0.60030700 | -0.06681500 |
| C | 2.20538900  | -0.58168700 | 0.03313900  |
| N | 3.05496100  | -1.37165800 | 0.11716300  |

**Transition state**

|   |             |             |             |
|---|-------------|-------------|-------------|
| C | -0.06197500 | -0.79831900 | -0.01432600 |
| C | 1.00377200  | 0.07525800  | -0.10334300 |
| C | 0.41234900  | 1.38537700  | -0.13701100 |
| H | 0.86379800  | 2.24082500  | 0.37073000  |
| H | -0.24332500 | 1.63496100  | -0.96226700 |
| C | -1.12749900 | 0.01823000  | 0.49199900  |
| H | -0.13354400 | -1.83884600 | -0.31867700 |
| H | -1.00666000 | 0.48195800  | 1.46577800  |
| C | -2.49004600 | -0.13728400 | 0.07587000  |
| N | -3.59168100 | -0.23398300 | -0.29175400 |
| C | 2.40251600  | -0.20379500 | -0.05143900 |
| N | 3.54668400  | -0.41683200 | -0.01197000 |

**Cyclobutene (Starting material)**

|   |             |             |             |
|---|-------------|-------------|-------------|
| C | 0.03508100  | -0.93093300 | 0.51754900  |
| C | 0.94708200  | -0.02492600 | 0.11713300  |
| C | -0.01443100 | 1.15622600  | 0.15387200  |
| H | -0.25105100 | 1.59436800  | -0.81969100 |
| H | 0.22311600  | 1.94871200  | 0.87041800  |
| C | -1.07672400 | 0.10267500  | 0.67069300  |
| H | 0.05533000  | -2.00170900 | 0.69032300  |
| H | -1.37841000 | 0.27661600  | 1.71094300  |
| C | -2.27252600 | -0.07946500 | -0.14983400 |
| N | -3.21975700 | -0.22879100 | -0.80569100 |
| C | 2.32752900  | -0.10418600 | -0.21194900 |
| N | 3.45903500  | -0.13325600 | -0.48527700 |

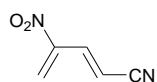**Butadiene (Product)**

|   |             |             |             |
|---|-------------|-------------|-------------|
| C | -0.59072400 | -0.11171900 | -0.19545400 |
| C | 0.73747100  | 0.49404800  | -0.09746300 |
| C | 1.04893900  | 1.79528100  | -0.13802400 |
| H | 2.07705300  | 2.12559800  | -0.04909700 |

|   |             |             |             |
|---|-------------|-------------|-------------|
| H | 0.27437800  | 2.54176600  | -0.27771800 |
| C | -1.71347400 | 0.50297800  | 0.22807600  |
| H | -0.64548700 | -1.10629300 | -0.62505600 |
| H | -1.68349200 | 1.47042000  | 0.72471200  |
| C | -3.00849200 | -0.07519500 | 0.06976900  |
| N | -4.07911800 | -0.51792300 | -0.04704700 |
| N | 1.86639900  | -0.47892900 | 0.02651000  |
| O | 1.57299800  | -1.67390700 | -0.00017800 |
| O | 3.00503400  | -0.03683000 | 0.14636500  |

### Transition state

|   |             |             |             |
|---|-------------|-------------|-------------|
| C | -0.44202400 | -0.78655700 | 0.03917700  |
| C | 0.58370100  | 0.11219500  | -0.10011100 |
| C | 0.02287700  | 1.42204400  | -0.16985200 |
| H | 0.47833000  | 2.27629200  | 0.33195700  |
| H | -0.63570100 | 1.66011800  | -0.99689600 |
| C | -1.51008500 | 0.05242300  | 0.50607200  |
| H | -0.49652900 | -1.83662600 | -0.22765400 |
| H | -1.39312800 | 0.55759400  | 1.45960200  |
| C | -2.86615400 | -0.10338500 | 0.07429100  |
| N | -3.96280100 | -0.20268700 | -0.30685200 |
| N | 2.00891600  | -0.16370200 | -0.03788100 |
| O | 2.76426000  | 0.80962600  | 0.02549800  |
| O | 2.36003100  | -1.34374700 | -0.05691500 |

### Cyclobutene (Starting material)

|   |             |             |             |
|---|-------------|-------------|-------------|
| C | -0.33399300 | -0.97712500 | 0.45015200  |
| C | 0.53990200  | -0.00588800 | 0.16407100  |
| C | -0.39919100 | 1.16038300  | 0.30665500  |
| H | -0.62975700 | 1.69910300  | -0.61588200 |
| H | -0.17646900 | 1.87060800  | 1.10781700  |
| C | -1.45432100 | 0.03767600  | 0.69457900  |
| H | -0.29465400 | -2.05800800 | 0.50812500  |
| H | -1.76595800 | 0.09586300  | 1.74394200  |
| C | -2.63461800 | -0.07112500 | -0.15916200 |
| N | -3.57006700 | -0.16097400 | -0.84182600 |
| N | 1.94845400  | -0.05115300 | -0.15683000 |



|   |            |             |             |
|---|------------|-------------|-------------|
| O | 2.50259900 | 1.03424800  | -0.34593700 |
| O | 2.48633200 | -1.15752300 | -0.21546000 |

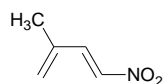

### Butadiene (Product)

|   |             |             |             |
|---|-------------|-------------|-------------|
| C | 0.43876600  | -0.31812800 | -0.13721000 |
| C | 1.84695000  | 0.09875100  | -0.04751200 |
| C | 2.23107300  | 1.36011900  | -0.31537100 |
| H | 3.27514300  | 1.65522400  | -0.25418100 |
| H | 1.52519200  | 2.12338000  | -0.63083800 |
| C | -0.61331000 | 0.45558700  | 0.16416700  |
| H | 0.23345700  | -1.34331300 | -0.44190600 |
| H | -0.58550800 | 1.46939300  | 0.53988700  |
| N | -1.97411300 | -0.03747800 | 0.01979200  |
| O | -2.16463300 | -1.19127500 | -0.37307800 |
| O | -2.86951300 | 0.76226200  | 0.31391400  |
| C | 2.83015300  | -0.99082900 | 0.31720300  |
| H | 2.60419300  | -1.41417800 | 1.30433000  |
| H | 2.78171600  | -1.81750000 | -0.40405600 |
| H | 3.85598100  | -0.61156200 | 0.33387900  |

### Transition state

|   |             |             |             |
|---|-------------|-------------|-------------|
| C | -0.58489400 | -0.76586500 | -0.24564100 |
| C | -1.70845200 | -0.02993800 | 0.06978600  |
| C | -1.19915000 | 1.21411100  | 0.56566900  |
| H | -1.70990100 | 2.16421200  | 0.37428500  |
| H | -0.55914300 | 1.22329300  | 1.43972100  |
| C | 0.42460500  | 0.22433000  | -0.41775500 |
| H | -0.45712100 | -1.83886300 | -0.35746300 |
| H | 0.40587400  | 0.97389800  | -1.19732100 |
| N | 1.81207000  | -0.06160600 | -0.03946600 |
| O | 2.66695600  | 0.77400400  | -0.35202000 |
| O | 2.03684900  | -1.10510300 | 0.58301100  |
| C | -3.15974700 | -0.34263400 | -0.16306200 |
| H | -3.72695800 | -0.35206600 | 0.77533200  |

|   |             |             |             |
|---|-------------|-------------|-------------|
| H | -3.61689100 | 0.42203000  | -0.80651100 |
| H | -3.28496700 | -1.31249400 | -0.65370000 |

### Cyclobutene (Starting material)

|   |             |             |             |
|---|-------------|-------------|-------------|
| C | -1.60856400 | 0.02053100  | 0.07116800  |
| C | -0.72081800 | -0.49224000 | 0.94270500  |
| C | 0.37772300  | 0.46012500  | 0.55618100  |
| H | -0.75746900 | -1.27845300 | 1.69049800  |
| H | 0.73493700  | 1.18072500  | 1.29275500  |
| C | -0.61784500 | 1.01577900  | -0.52326600 |
| H | -0.85386700 | 2.08152900  | -0.41704200 |
| H | -0.31168200 | 0.81307000  | -1.55581300 |
| N | 1.63467100  | -0.14207500 | -0.04513500 |
| O | 1.53483600  | -1.20763400 | -0.64771000 |
| O | 2.67513400  | 0.50151700  | 0.08770700  |
| C | -3.04238000 | -0.22293900 | -0.24651700 |
| H | -3.16291500 | -0.51137000 | -1.29942800 |
| H | -3.46243400 | -1.01744100 | 0.37911000  |
| H | -3.63772900 | 0.68787700  | -0.09573200 |

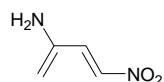

### Butadiene (Product)

|   |             |             |             |
|---|-------------|-------------|-------------|
| C | 0.44793600  | -0.34756800 | -0.13316700 |
| C | 1.85857600  | 0.05736700  | -0.03372400 |
| C | 2.26894200  | 1.31621000  | -0.30553700 |
| H | 3.31597800  | 1.59904200  | -0.23851000 |
| H | 1.57462900  | 2.06541200  | -0.66608800 |
| C | -0.58737200 | 0.44247200  | 0.17878500  |
| H | 0.23942100  | -1.36382200 | -0.46244300 |
| H | -0.53757800 | 1.45111200  | 0.56548000  |
| N | -1.95690000 | -0.02030400 | 0.01735500  |
| O | -2.16704200 | -1.16817800 | -0.38285100 |
| O | -2.83749800 | 0.79651800  | 0.30861800  |
| N | 2.73066100  | -1.00528900 | 0.24178100  |
| H | 2.40616200  | -1.67446000 | 0.93126100  |

|   |            |             |            |
|---|------------|-------------|------------|
| H | 3.69289400 | -0.73574400 | 0.41207900 |
|---|------------|-------------|------------|

**Transition state**

|   |             |             |             |
|---|-------------|-------------|-------------|
| C | -0.59187900 | -0.78767600 | -0.24830100 |
| C | -1.71889100 | -0.04375700 | 0.06279500  |
| C | -1.23547200 | 1.22360300  | 0.53327100  |
| H | -1.78118400 | 2.14749600  | 0.31458700  |
| H | -0.62789100 | 1.25293500  | 1.42940300  |
| C | 0.39540800  | 0.21731600  | -0.43334300 |
| H | -0.45589300 | -1.86077500 | -0.34070200 |
| H | 0.39573200  | 0.95962200  | -1.22030100 |
| N | 1.78676700  | -0.05530900 | -0.03020300 |
| O | 2.64095500  | 0.77280700  | -0.36266100 |
| O | 2.01109100  | -1.07826500 | 0.62392000  |
| N | -3.04887900 | -0.30514000 | -0.20005300 |
| H | -3.73422800 | 0.00709100  | 0.47508500  |
| H | -3.27312300 | -1.19647800 | -0.62288400 |

**Cyclobutene (Starting material)**

|   |             |             |             |
|---|-------------|-------------|-------------|
| C | -1.61222300 | -0.07595600 | -0.06764600 |
| C | -0.69794800 | -0.62798200 | -0.90112300 |
| C | 0.35037100  | -0.71284600 | 0.17122800  |
| H | -0.69289300 | -0.94713700 | -1.93704200 |
| H | 0.74229200  | -1.68761500 | 0.46574300  |
| C | -0.68746600 | -0.04337600 | 1.13273200  |
| H | -0.97808600 | -0.67290600 | 1.98238900  |
| H | -0.39876800 | 0.95239600  | 1.48455300  |
| N | 1.60495100  | 0.13749300  | -0.05470300 |
| N | -2.94000600 | 0.25116200  | -0.12491600 |
| H | -3.27454800 | 0.94074400  | 0.53605100  |
| H | -3.36298100 | 0.33062700  | -1.04183300 |
| O | 1.46050700  | 1.32970500  | -0.31096700 |
| O | 2.68873800  | -0.43917200 | 0.03050700  |

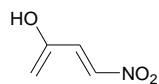

### Butadiene (Product)

|   |             |             |             |
|---|-------------|-------------|-------------|
| C | -0.45454700 | -0.34903700 | 0.12136800  |
| C | -1.86365800 | 0.04569100  | 0.02754400  |
| C | -2.33166600 | 1.27432400  | 0.30514300  |
| H | -3.39242900 | 1.48934100  | 0.23376400  |
| H | -1.66728900 | 2.05750700  | 0.64859800  |
| C | 0.57761200  | 0.45156900  | -0.17543500 |
| H | -0.23257300 | -1.36650900 | 0.44207300  |
| H | 0.52386300  | 1.46541100  | -0.54814300 |
| N | 1.94837700  | -0.00848200 | -0.01296000 |
| O | 2.15751200  | -1.16215800 | 0.37085100  |
| O | 2.82673500  | 0.81558900  | -0.28620700 |
| O | -2.75185500 | -0.95563200 | -0.29107000 |
| H | -2.29580000 | -1.70405100 | -0.70587800 |

### Transition state

|   |             |             |             |
|---|-------------|-------------|-------------|
| C | -0.60068000 | -0.80371700 | -0.30438500 |
| C | -1.71030900 | -0.06467800 | 0.04013900  |
| C | -1.24972400 | 1.19451000  | 0.53879400  |
| H | -1.80483700 | 2.11829600  | 0.34156300  |
| H | -0.63238000 | 1.21906200  | 1.42844700  |
| C | 0.38142000  | 0.21400100  | -0.45110200 |
| H | -0.47056500 | -1.87346900 | -0.42089900 |
| H | 0.38129500  | 0.97332500  | -1.22139700 |
| N | 1.76857500  | -0.04733100 | -0.02404500 |
| O | 2.61769300  | 0.79354300  | -0.33419700 |
| O | 1.98834800  | -1.07250500 | 0.62631700  |
| O | -3.00324100 | -0.40582200 | -0.19793300 |
| H | -3.60017400 | 0.13168400  | 0.34643100  |

### Cyclobutene (Starting material)

|   |             |             |             |
|---|-------------|-------------|-------------|
| C | -1.60970800 | -0.07345000 | -0.07805600 |
| C | -0.70967300 | -0.68560300 | -0.86758700 |

|   |             |             |             |
|---|-------------|-------------|-------------|
| C | 0.32842200  | -0.69208600 | 0.22458900  |
| H | -0.70173200 | -1.07324600 | -1.87829200 |
| H | 0.70176700  | -1.64832000 | 0.59254600  |
| C | -0.70761100 | 0.05639600  | 1.13174800  |
| H | -1.00298300 | -0.50487900 | 2.02675100  |
| H | -0.41257600 | 1.07491400  | 1.40369800  |
| N | 1.58738300  | 0.12744200  | -0.05687500 |
| O | 1.45102000  | 1.29972200  | -0.39425200 |
| O | 2.66410400  | -0.45312000 | 0.06976300  |
| O | -2.89894500 | 0.26206100  | -0.26421900 |
| H | -3.23416800 | 0.75859300  | 0.49892200  |

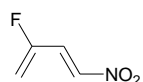

### Butadiene (Product)

|   |             |             |             |
|---|-------------|-------------|-------------|
| C | -1.60035800 | 0.00221700  | 0.06489700  |
| C | -0.74912400 | -0.29000700 | 1.05195600  |
| C | 0.31274200  | 0.58388400  | 0.42280700  |
| H | -0.77090800 | -0.87592200 | 1.96135100  |
| H | 0.66371100  | 1.45327400  | 0.97815100  |
| C | -0.69121300 | 0.87295700  | -0.75523800 |
| H | -0.97462900 | 1.92541500  | -0.85995200 |
| H | -0.38195600 | 0.46341400  | -1.72132100 |
| N | 1.57356700  | -0.13374000 | -0.03646500 |
| O | 1.44486000  | -1.21078600 | -0.60993700 |
| O | 2.64197600  | 0.42979900  | 0.19135600  |
| F | -2.87535200 | -0.31071200 | -0.16231700 |

### Transition state

|   |             |             |             |
|---|-------------|-------------|-------------|
| C | -0.61534300 | -0.81334100 | -0.31708300 |
| C | -1.69479800 | -0.05607100 | 0.05150900  |
| C | -1.26093800 | 1.20061600  | 0.54754900  |
| H | -1.82974900 | 2.11240900  | 0.35018300  |
| H | -0.61773200 | 1.23576100  | 1.41803600  |
| C | 0.36855600  | 0.20505800  | -0.46375700 |
| H | -0.49442200 | -1.88457200 | -0.42601200 |

|   |             |             |             |
|---|-------------|-------------|-------------|
| H | 0.35767200  | 0.96425800  | -1.23378200 |
| N | 1.75144000  | -0.04752000 | -0.02560300 |
| O | 2.59602700  | 0.79995600  | -0.32634900 |
| O | 1.96900500  | -1.07549200 | 0.62083600  |
| F | -2.99788500 | -0.34538800 | -0.13271200 |

### Cyclobutene (Starting material)

|   |             |             |             |
|---|-------------|-------------|-------------|
| C | -1.60035800 | 0.00221700  | 0.06489700  |
| C | -0.74912400 | -0.29000700 | 1.05195600  |
| C | 0.31274200  | 0.58388400  | 0.42280700  |
| H | -0.77090800 | -0.87592200 | 1.96135100  |
| H | 0.66371100  | 1.45327400  | 0.97815100  |
| C | -0.69121300 | 0.87295700  | -0.75523800 |
| H | -0.97462900 | 1.92541500  | -0.85995200 |
| H | -0.38195600 | 0.46341400  | -1.72132100 |
| N | 1.57356700  | -0.13374000 | -0.03646500 |
| O | 1.44486000  | -1.21078600 | -0.60993700 |
| O | 2.64197600  | 0.42979900  | 0.19135600  |
| F | -2.87535200 | -0.31071200 | -0.16231700 |

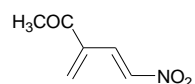

### Butadiene (Product)

|   |             |             |             |
|---|-------------|-------------|-------------|
| C | -0.23799500 | -0.09892400 | -0.18657800 |
| C | 1.10505400  | 0.50089500  | -0.13585000 |
| C | 1.33216000  | 1.81789200  | -0.31165800 |
| H | 2.33107900  | 2.23882600  | -0.27224800 |
| H | 0.52589000  | 2.51426800  | -0.52453900 |
| C | -1.36251400 | 0.54499900  | 0.14623000  |
| H | -0.30078400 | -1.14256000 | -0.48174800 |
| H | -1.44998900 | 1.55459200  | 0.52540800  |
| N | -2.66253900 | -0.10572400 | 0.04333000  |
| O | -2.72918800 | -1.26741400 | -0.35934500 |
| O | -3.63195200 | 0.58408600  | 0.37885600  |
| C | 2.23825800  | -0.47805100 | 0.06657800  |
| C | 3.65830800  | 0.03801800  | 0.20164700  |

|   |            |             |             |
|---|------------|-------------|-------------|
| H | 4.31742200 | -0.81083900 | 0.39261700  |
| H | 3.98296300 | 0.54208700  | -0.71678400 |
| H | 3.74623300 | 0.75718300  | 1.02452200  |
| O | 1.99680800 | -1.67448000 | 0.11389700  |

**Transition state**

|   |             |             |             |
|---|-------------|-------------|-------------|
| C | 0.07866800  | 0.66862300  | 0.03356500  |
| C | -0.96896100 | -0.21070800 | -0.18903400 |
| C | -0.34727100 | -1.47429700 | -0.44987700 |
| H | -0.76812600 | -2.41143600 | -0.08050300 |
| H | 0.31907000  | -1.56935000 | -1.29882100 |
| C | 1.14199200  | -0.19492900 | 0.40879800  |
| H | 0.13636900  | 1.74776000  | -0.07118700 |
| H | 1.11389800  | -0.81984600 | 1.29220500  |
| N | 2.52695900  | 0.13325000  | 0.06076100  |
| O | 3.41041100  | -0.59315200 | 0.52318800  |
| O | 2.71619700  | 1.10089100  | -0.68310700 |
| C | -2.43433700 | -0.02654600 | 0.00184100  |
| C | -2.94699800 | 1.37882600  | 0.24016100  |
| H | -2.63433200 | 1.73388200  | 1.23050300  |
| H | -2.54112600 | 2.07895700  | -0.50053100 |
| H | -4.03773700 | 1.38007300  | 0.18869100  |
| O | -3.17851900 | -0.99756500 | -0.02238100 |

**Cyclobutene (Starting material)**

|   |             |             |             |
|---|-------------|-------------|-------------|
| C | 0.87593200  | -0.12563500 | 0.18581200  |
| C | 0.02312800  | 0.79837900  | 0.67614500  |
| C | -1.13407500 | -0.16362100 | 0.72310700  |
| H | 0.10643800  | 1.83886400  | 0.97191100  |
| H | -1.53106600 | -0.44094100 | 1.70124300  |
| C | -0.17199300 | -1.22140200 | 0.06571700  |
| H | -0.01333300 | -2.12976200 | 0.65409000  |
| H | -0.44260700 | -1.49414200 | -0.95888400 |
| N | -2.33777300 | 0.17849100  | -0.12397500 |
| O | -2.23387000 | 1.10244900  | -0.92753800 |
| O | -3.33561700 | -0.51969400 | 0.03604200  |
| C | 2.32482600  | -0.15457200 | -0.12382900 |

|   |            |             |             |
|---|------------|-------------|-------------|
| C | 3.11531600 | 1.12643000  | 0.04331000  |
| H | 3.04085800 | 1.49724700  | 1.07326200  |
| H | 4.16325100 | 0.94319000  | -0.20314400 |
| H | 2.71704100 | 1.90937000  | -0.61439000 |
| O | 2.83511400 | -1.19909700 | -0.50573300 |

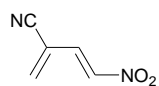

### Butadiene (Product)

|   |             |             |             |
|---|-------------|-------------|-------------|
| C | -0.20425600 | -0.17633300 | 0.18117100  |
| C | -1.55482100 | 0.41139700  | 0.10683300  |
| C | -1.83168800 | 1.72113200  | 0.27430100  |
| H | -2.84796500 | 2.09476500  | 0.20694200  |
| H | -1.04769500 | 2.43566100  | 0.50453200  |
| C | 0.90959800  | 0.47374700  | -0.17282500 |
| H | -0.11658600 | -1.20353800 | 0.52655900  |
| H | 0.97910800  | 1.46908100  | -0.59091600 |
| N | 2.21832700  | -0.15643200 | -0.03356300 |
| O | 2.28962700  | -1.30472200 | 0.40434800  |
| O | 3.18037000  | 0.53565000  | -0.37795500 |
| C | -2.63090800 | -0.51914500 | -0.12625600 |
| N | -3.48324000 | -1.28759400 | -0.31466600 |

### Transition state

|   |             |             |             |
|---|-------------|-------------|-------------|
| C | -0.32809100 | -0.73721500 | -0.17172100 |
| C | -1.40839700 | 0.07275800  | 0.13727700  |
| C | -0.84428300 | 1.31594200  | 0.57542200  |
| H | -1.30261800 | 2.27779700  | 0.33522500  |
| H | -0.19829700 | 1.31728400  | 1.44459900  |
| C | 0.70221200  | 0.21013300  | -0.40892100 |
| H | -0.24405100 | -1.81846300 | -0.19658600 |
| H | 0.66719000  | 0.93721000  | -1.21008000 |
| N | 2.09408700  | -0.10521900 | -0.06340300 |
| O | 2.95238200  | 0.71091600  | -0.40448900 |
| O | 2.30426200  | -1.15112300 | 0.55597000  |
| C | -2.80001000 | -0.17583900 | -0.06398800 |



|   |             |             |             |
|---|-------------|-------------|-------------|
| N | -3.93751000 | -0.36718700 | -0.22137100 |
|---|-------------|-------------|-------------|

**Cyclobutene (Starting material)**

|   |             |             |             |
|---|-------------|-------------|-------------|
| C | -1.31354200 | 0.05869200  | 0.13990700  |
| C | -0.42610200 | -0.67433300 | 0.84169300  |
| C | 0.68272200  | 0.32604100  | 0.65096700  |
| H | -0.47793600 | -1.61324100 | 1.38036400  |
| H | 1.05178200  | 0.85351300  | 1.53230000  |
| C | -0.31356800 | 1.14492500  | -0.24720700 |
| H | -0.52537700 | 2.15963200  | 0.10260900  |
| H | -0.04378200 | 1.16638700  | -1.30739700 |
| N | 1.91311500  | -0.15103600 | -0.08724200 |
| O | 1.87971000  | -1.26463100 | -0.60315400 |
| O | 2.85520300  | 0.63504600  | -0.13511500 |
| C | -2.70011800 | -0.08009200 | -0.13882200 |
| N | -3.83602200 | -0.16053700 | -0.38146600 |

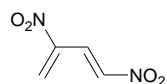**Butadiene (Product)**

|   |             |             |             |
|---|-------------|-------------|-------------|
| C | 0.16849800  | -0.09681100 | 0.19689800  |
| C | -1.15515600 | 0.52195900  | 0.13632300  |
| C | -1.46232600 | 1.81487200  | 0.29344400  |
| H | -2.49010900 | 2.15307800  | 0.23300300  |
| H | -0.68665500 | 2.54399400  | 0.50187000  |
| C | 1.28495200  | 0.54312600  | -0.16706900 |
| H | 0.23809200  | -1.12248800 | 0.54450500  |
| H | 1.36229700  | 1.53530400  | -0.59175900 |
| N | 2.58950700  | -0.09691100 | -0.03018300 |
| O | 2.65447900  | -1.23796600 | 0.42567500  |
| O | 3.55374000  | 0.58212900  | -0.39451100 |
| N | -2.28292500 | -0.43446900 | -0.09037700 |
| O | -1.98492400 | -1.62291400 | -0.19701700 |
| O | -3.42148300 | 0.01761400  | -0.15930600 |

**Transition state**

|   |             |             |             |
|---|-------------|-------------|-------------|
| C | 0.05543000  | -0.73819700 | -0.12869200 |
| C | -0.98620200 | 0.11668200  | 0.14405100  |
| C | -0.45290200 | 1.39440600  | 0.47187800  |
| H | -0.91820000 | 2.32032000  | 0.13303000  |
| H | 0.19898500  | 1.48205000  | 1.33278300  |
| C | 1.08631300  | 0.19118100  | -0.43173000 |
| H | 0.12296800  | -1.81799400 | -0.07067500 |
| H | 1.05128500  | 0.86050400  | -1.28181100 |
| N | 2.47575200  | -0.08765000 | -0.04631300 |
| O | 3.33346800  | 0.70045600  | -0.44777600 |
| O | 2.68079500  | -1.07729700 | 0.66012600  |
| N | -2.40638000 | -0.14844600 | -0.03359500 |
| O | -2.74189300 | -1.31475400 | -0.23437200 |
| O | -3.16693000 | 0.81951400  | 0.03614600  |

**Cyclobutene (Starting material)**

|   |             |             |             |
|---|-------------|-------------|-------------|
| C | -0.90311300 | 0.05040900  | 0.19172200  |
| C | -0.05083300 | -0.85798700 | 0.68129100  |
| C | 1.06415300  | 0.16236000  | 0.72589700  |
| H | -0.11573800 | -1.89927900 | 0.96926500  |
| H | 1.44466000  | 0.45014800  | 1.70661600  |
| C | 0.06845300  | 1.19513800  | 0.06813600  |
| H | -0.13280500 | 2.08825800  | 0.66529200  |
| H | 0.32949700  | 1.48021500  | -0.95497100 |
| N | 2.27378700  | -0.13463900 | -0.12842900 |
| O | 2.17233500  | -1.01816600 | -0.97502100 |
| O | 3.26559000  | 0.55936600  | 0.07303600  |
| N | -2.31694300 | -0.02091600 | -0.10513000 |
| O | -2.88617100 | -1.09501000 | 0.08733600  |
| O | -2.83868900 | 1.01256400  | -0.52954800 |

### 6.3.3 1,4-Disubstituted butadienes

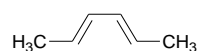

#### Butadiene (Product)

|   |             |             |             |
|---|-------------|-------------|-------------|
| C | 0.73157500  | 0.71381500  | -0.06997400 |
| C | -0.73156300 | 0.71381500  | 0.07003600  |
| C | -1.55315200 | -0.32738800 | -0.15058700 |
| H | -1.17729800 | 1.66787300  | 0.36033900  |
| H | -1.12701300 | -1.26934300 | -0.50001500 |
| C | 1.55316000  | -0.32737900 | 0.15072400  |
| H | 1.12699700  | -1.26932800 | 0.50012700  |
| C | 3.04350800  | -0.30117300 | -0.03263500 |
| H | 3.39222300  | 0.68500100  | -0.35976900 |
| H | 3.56528200  | -0.55638300 | 0.90040200  |
| H | 3.36459500  | -1.03868600 | -0.78211700 |
| H | 1.17731000  | 1.66780200  | -0.36049000 |
| C | -3.04351500 | -0.30116800 | 0.03251500  |
| H | -3.39236800 | 0.68514500  | 0.35911100  |
| H | -3.56517500 | -0.55691900 | -0.90043500 |
| H | -3.36462600 | -1.03829900 | 0.78237300  |

#### Transition state

|   |             |             |             |
|---|-------------|-------------|-------------|
| C | -0.68327900 | 1.21952300  | -0.08092100 |
| C | 0.68325500  | 1.21953200  | 0.08091200  |
| C | 1.02350700  | -0.14502100 | 0.35840700  |
| H | 1.39277400  | 2.03440800  | -0.07179600 |
| H | 0.59944800  | -0.57152800 | 1.26283100  |
| C | -1.02348600 | -0.14504900 | -0.35838400 |
| H | -1.39280700 | 2.03439100  | 0.07178300  |
| H | -0.59940100 | -0.57154700 | -1.26280000 |
| C | -2.28535300 | -0.81950800 | 0.12409700  |
| H | -3.14666600 | -0.51896800 | -0.49491600 |
| H | -2.20735800 | -1.91057100 | 0.05069200  |
| H | -2.52173800 | -0.56324500 | 1.16321400  |
| C | 2.28536400  | -0.81948500 | -0.12410400 |
| H | 3.14648800  | -0.52002100 | 0.49568600  |

|   |            |             |             |
|---|------------|-------------|-------------|
| H | 2.20685900 | -1.91060100 | -0.05189300 |
| H | 2.52235100 | -0.56227100 | -1.16284300 |

**Cyclobutene (Starting material)**

|   |             |             |             |
|---|-------------|-------------|-------------|
| C | 0.57501400  | 1.32311700  | 0.34583900  |
| C | -0.57497200 | 1.32315700  | -0.34581900 |
| C | -0.67370700 | -0.19562300 | -0.41584300 |
| H | -1.22291300 | 2.11156400  | -0.72436400 |
| H | -0.51911100 | -0.59160000 | -1.43046400 |
| C | 0.67367500  | -0.19566600 | 0.41582600  |
| H | 1.22300200  | 2.11148200  | 0.72439800  |
| H | 0.51903500  | -0.59167400 | 1.43043000  |
| C | 1.89277200  | -0.86328800 | -0.21932100 |
| H | 2.80291700  | -0.65409800 | 0.35756500  |
| H | 1.76977100  | -1.95325600 | -0.26246100 |
| H | 2.05355700  | -0.49780500 | -1.24143100 |
| C | -1.89278600 | -0.86327100 | 0.21931600  |
| H | -2.80297300 | -0.65403600 | -0.35748300 |
| H | -1.76976800 | -1.95324500 | 0.26234500  |
| H | -2.05349200 | -0.49788500 | 1.24147200  |

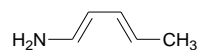**Butadiene (Product)**

|   |             |             |             |
|---|-------------|-------------|-------------|
| C | -0.75883700 | 0.73727400  | 0.06326100  |
| C | 0.70034600  | 0.71362300  | -0.06344700 |
| C | 1.52409500  | -0.32626800 | 0.16777600  |
| H | 1.15480900  | 1.65887700  | -0.37043700 |
| H | 1.10489800  | -1.26370100 | 0.53830000  |
| C | -1.57356700 | -0.32288900 | -0.12540200 |
| H | -1.16376800 | -1.28100000 | -0.43806600 |
| H | -1.21038300 | 1.70403900  | 0.29380700  |
| C | 3.01250400  | -0.30291600 | -0.04003100 |
| H | 3.35535400  | 0.68567400  | -0.36757700 |
| H | 3.55204400  | -0.56155300 | 0.88232100  |
| H | 3.32540900  | -1.03337500 | -0.80049200 |

|   |             |             |             |
|---|-------------|-------------|-------------|
| N | -2.96577400 | -0.30809800 | -0.05350800 |
| H | -3.40877900 | -1.19578300 | 0.14495800  |
| H | -3.37640100 | 0.45057200  | 0.47879700  |

**Transition state**

|   |             |             |             |
|---|-------------|-------------|-------------|
| C | -0.61250000 | 1.21744200  | -0.09368200 |
| C | 0.74474800  | 1.19650200  | 0.10800100  |
| C | 1.03452100  | -0.19196600 | 0.36703800  |
| H | 1.48525800  | 1.99260800  | 0.02628300  |
| H | 0.67300900  | -0.62436300 | 1.29360300  |
| C | -0.98360100 | -0.14557600 | -0.36139400 |
| H | -1.29745100 | 2.05665600  | 0.04625100  |
| H | -0.59499100 | -0.57057600 | -1.28381400 |
| C | -2.27924200 | -0.76264900 | 0.11679800  |
| H | -3.14324200 | -0.36729500 | -0.44376400 |
| H | -2.28043300 | -1.85059600 | -0.02239100 |
| H | -2.46490400 | -0.56047600 | 1.17911500  |
| N | 2.19830000  | -0.79767500 | -0.10217700 |
| H | 2.45014200  | -0.61449900 | -1.06585000 |
| H | 2.36095900  | -1.76024800 | 0.16524100  |

**Cyclobutene (Starting material)**

|   |             |             |             |
|---|-------------|-------------|-------------|
| C | -0.50609900 | 1.34317300  | -0.32254000 |
| C | 0.67100900  | 1.28328400  | 0.31678100  |
| C | 0.68414300  | -0.23441000 | 0.38817600  |
| H | 1.37492800  | 2.03200400  | 0.67394700  |
| H | 0.52554400  | -0.61814000 | 1.41183100  |
| C | -0.67638900 | -0.16740600 | -0.41469800 |
| H | -1.13675400 | 2.16672500  | -0.65243100 |
| H | -0.53133300 | -0.55092300 | -1.43291500 |
| C | -1.91499900 | -0.79296400 | 0.22482100  |
| H | -2.82144800 | -0.52702300 | -0.33402800 |
| H | -1.84490300 | -1.88857600 | 0.23924900  |
| H | -2.04734600 | -0.44666700 | 1.25771100  |
| N | 1.79032900  | -0.89010100 | -0.31252800 |
| H | 1.71979900  | -1.90391700 | -0.23069800 |
| H | 2.68322000  | -0.62284500 | 0.09978900  |

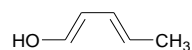

### Butadiene (Product)

|   |             |             |             |
|---|-------------|-------------|-------------|
| C | -0.77626200 | 0.74200400  | 0.07333800  |
| C | 0.68109900  | 0.72013000  | -0.08264800 |
| C | 1.49999500  | -0.31382300 | 0.18369800  |
| H | 1.12897100  | 1.64991400  | -0.44068900 |
| H | 1.07776600  | -1.22527800 | 0.61051900  |
| C | -1.57673300 | -0.31075200 | -0.15063700 |
| H | -1.19916200 | -1.26305800 | -0.52029400 |
| H | -1.24266400 | 1.68174200  | 0.36726000  |
| C | 2.98499000  | -0.31345600 | -0.04463600 |
| H | 3.33184800  | 0.65186300  | -0.43107800 |
| H | 3.53240500  | -0.52606500 | 0.88438800  |
| H | 3.27959800  | -1.08915100 | -0.76613500 |
| O | -2.92756600 | -0.25047100 | 0.08988900  |
| H | -3.36677500 | -1.02082100 | -0.29776400 |

### Transition state

|   |             |             |             |
|---|-------------|-------------|-------------|
| C | -0.58322300 | 1.22059900  | -0.06208900 |
| C | 0.78584400  | 1.17388900  | 0.07882200  |
| C | 1.03729700  | -0.20864900 | 0.33042200  |
| H | 1.54173400  | 1.94856600  | -0.03759200 |
| H | 0.69289300  | -0.65699900 | 1.25726300  |
| C | -0.98397400 | -0.12196000 | -0.36075500 |
| H | -1.25153600 | 2.05826500  | 0.14453400  |
| H | -0.60069500 | -0.53802900 | -1.28828300 |
| C | -2.27655000 | -0.74019600 | 0.12149000  |
| H | -3.12741900 | -0.41039500 | -0.49676400 |
| H | -2.24359200 | -1.83444400 | 0.05435300  |
| H | -2.50227000 | -0.47218100 | 1.16048900  |
| O | 2.15536800  | -0.80218800 | -0.21305500 |
| H | 2.37157700  | -1.61937500 | 0.26310300  |

**Cyclobutene (Starting material)**

|   |             |             |             |
|---|-------------|-------------|-------------|
| C | -0.44917800 | 1.36060700  | -0.29142400 |
| C | 0.74763000  | 1.25081400  | 0.30600400  |
| C | 0.69465600  | -0.25746900 | 0.37195500  |
| H | 1.49355600  | 1.96071000  | 0.65274300  |
| H | 0.55646200  | -0.65688600 | 1.38905800  |
| C | -0.67574000 | -0.14155900 | -0.41648500 |
| H | -1.06994200 | 2.21097200  | -0.56606400 |
| H | -0.54515900 | -0.50575200 | -1.44374000 |
| C | -1.92936700 | -0.74534900 | 0.21446700  |
| H | -2.83161800 | -0.43603800 | -0.32841400 |
| H | -1.89491800 | -1.84261900 | 0.19783400  |
| H | -2.04324500 | -0.42438700 | 1.25784800  |
| O | 1.78636300  | -0.90570800 | -0.26775300 |
| H | 1.71595600  | -1.86260100 | -0.12435400 |

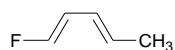**Butadiene (Product)**

|   |             |             |             |
|---|-------------|-------------|-------------|
| C | -0.79840400 | 0.70677800  | 0.09118000  |
| C | 0.65964800  | 0.71523100  | -0.08566800 |
| C | 1.49108000  | -0.30567100 | 0.18467600  |
| H | 1.08429700  | 1.65064100  | -0.45489700 |
| H | 1.07954800  | -1.21925400 | 0.61680000  |
| C | -1.57454900 | -0.34599600 | -0.17068500 |
| H | -1.26152500 | -1.30142600 | -0.57802600 |
| H | -1.28109700 | 1.62276400  | 0.42958900  |
| C | 2.97495800  | -0.28754200 | -0.04327000 |
| H | 3.31017900  | 0.67562600  | -0.44401400 |
| H | 3.52224900  | -0.48056400 | 0.88962700  |
| H | 3.27625300  | -1.07201700 | -0.75165300 |
| F | -2.91625500 | -0.30806200 | 0.04835300  |

**Transition state**

|   |             |            |             |
|---|-------------|------------|-------------|
| C | -0.54486600 | 1.21744000 | -0.05785300 |
|---|-------------|------------|-------------|

|   |             |             |             |
|---|-------------|-------------|-------------|
| C | 0.82982900  | 1.13498100  | 0.05494400  |
| C | 1.01923000  | -0.24111100 | 0.32732800  |
| H | 1.60610800  | 1.88701900  | -0.06723700 |
| H | 0.69880400  | -0.70995500 | 1.24982700  |
| C | -0.99114700 | -0.10307300 | -0.36734700 |
| H | -1.18840000 | 2.06110800  | 0.19358900  |
| H | -0.61433900 | -0.53638300 | -1.28871800 |
| C | -2.28860100 | -0.69722500 | 0.12399800  |
| H | -3.09729200 | -0.52979600 | -0.60421600 |
| H | -2.19912600 | -1.78365400 | 0.24676600  |
| H | -2.60230300 | -0.27282900 | 1.08394800  |
| F | 2.13887500  | -0.88684300 | -0.14448600 |

### Cyclobutene (Starting material)

|   |             |             |             |
|---|-------------|-------------|-------------|
| C | -0.35924200 | 1.37191900  | -0.29305700 |
| C | 0.83488300  | 1.20416300  | 0.29864300  |
| C | 0.67576800  | -0.29206700 | 0.38435700  |
| H | 1.61524500  | 1.87460100  | 0.64605200  |
| H | 0.56583200  | -0.71604700 | 1.38892000  |
| C | -0.66613700 | -0.11994200 | -0.40931600 |
| H | -0.94077800 | 2.25100500  | -0.56217600 |
| H | -0.54546900 | -0.49903200 | -1.43154700 |
| C | -1.95096500 | -0.65912600 | 0.21629600  |
| H | -2.83059700 | -0.31789800 | -0.34326600 |
| H | -1.95860000 | -1.75584900 | 0.21313900  |
| H | -2.06286400 | -0.31926900 | 1.25352400  |
| F | 1.66126500  | -1.06079900 | -0.26068800 |

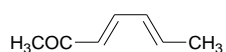

### Butadiene (Product)

|   |            |             |             |
|---|------------|-------------|-------------|
| C | 0.15395700 | 0.72101700  | -0.06685000 |
| C | 1.61506900 | 0.72195100  | -0.13597100 |
| C | 2.42371200 | -0.32031400 | 0.13609300  |
| H | 2.07296000 | 1.67379300  | -0.40828600 |



|   |             |             |             |
|---|-------------|-------------|-------------|
| H | 1.98127500  | -1.26313400 | 0.45995700  |
| C | -0.65907900 | -0.35834000 | -0.11412100 |
| H | -0.25593800 | -1.36076200 | -0.24385200 |
| C | -2.13277100 | -0.31855900 | -0.01104500 |
| H | -0.30156000 | 1.70746400  | 0.01568900  |
| C | 3.91922500  | -0.29026700 | 0.04653600  |
| H | 4.37756500  | -0.53542200 | 1.01461500  |
| H | 4.28240100  | -1.04178900 | -0.66856700 |
| H | 4.28864100  | 0.69067100  | -0.27134600 |
| C | -2.85051700 | 1.01564100  | 0.13607900  |
| H | -2.63112200 | 1.67933300  | -0.70928900 |
| H | -3.92610700 | 0.83209200  | 0.17773500  |
| H | -2.53877100 | 1.53318000  | 1.05159600  |
| O | -2.77086600 | -1.36777500 | -0.04532300 |

**Transition state**

|   |             |             |             |
|---|-------------|-------------|-------------|
| C | 1.56292600  | 1.23702400  | -0.06236700 |
| C | 0.25399900  | 1.40517800  | -0.42497700 |
| C | -0.26396000 | 0.06185900  | -0.55220500 |
| H | -0.30235300 | 2.33122300  | -0.56265400 |
| H | 0.17754800  | -0.59100000 | -1.30006200 |
| C | 1.64278900  | -0.11226800 | 0.43476200  |
| H | 2.41157000  | 1.90578900  | -0.20676900 |
| H | 1.05794400  | -0.33860000 | 1.32111200  |
| C | 2.79055900  | -1.04948300 | 0.18215500  |
| H | 3.56540200  | -0.91449700 | 0.95423800  |
| H | 2.46328300  | -2.09360000 | 0.24517600  |
| H | 3.25487000  | -0.88770700 | -0.79603700 |
| C | -1.60573300 | -0.39361100 | -0.11633100 |
| C | -2.50510400 | 0.59748000  | 0.60582100  |
| H | -3.48568300 | 0.14557300  | 0.77041500  |
| H | -2.06824600 | 0.87734000  | 1.57323100  |
| H | -2.61982200 | 1.52346600  | 0.02781300  |
| O | -1.96342100 | -1.55438300 | -0.30345200 |

**Cyclobutene (Starting material)**

|   |            |            |            |
|---|------------|------------|------------|
| C | 1.49720500 | 1.25532500 | 0.12885100 |
|---|------------|------------|------------|

|   |             |             |             |
|---|-------------|-------------|-------------|
| C | 0.51627300  | 1.37708200  | -0.77792800 |
| C | 0.01072500  | -0.04994700 | -0.61568300 |
| H | 0.18867000  | 2.18742600  | -1.42491000 |
| H | 0.18716100  | -0.70885300 | -1.47312500 |
| C | 1.15886700  | -0.18410100 | 0.48624100  |
| H | 2.27386100  | 1.92646400  | 0.48940900  |
| H | 0.74935000  | -0.29669400 | 1.50036300  |
| C | 2.21073200  | -1.26173200 | 0.23475500  |
| H | 3.04011900  | -1.16584000 | 0.94706800  |
| H | 1.78077200  | -2.26365300 | 0.35099400  |
| H | 2.62433000  | -1.18021500 | -0.77767800 |
| C | -1.39881300 | -0.31562300 | -0.11012800 |
| C | -2.06213800 | 0.73546700  | 0.76039300  |
| H | -2.39404100 | 1.57139300  | 0.12961000  |
| H | -2.93237200 | 0.30539300  | 1.26143800  |
| H | -1.36592000 | 1.15446900  | 1.49568800  |
| O | -1.96862900 | -1.35858900 | -0.39223300 |

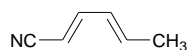

### Butadiene (Product)

|   |             |             |             |
|---|-------------|-------------|-------------|
| C | -0.35945900 | 0.73859500  | 0.03359200  |
| C | 1.09837400  | 0.72963400  | -0.05812800 |
| C | 1.89544600  | -0.34243300 | 0.11242300  |
| H | 1.56192500  | 1.69763400  | -0.25028000 |
| H | 1.44445400  | -1.30257700 | 0.36761000  |
| C | -1.17801500 | -0.32168300 | -0.15848400 |
| H | -0.78871600 | -1.29597400 | -0.44495000 |
| C | -2.59341400 | -0.23155300 | -0.01637100 |
| H | -0.81863500 | 1.69944300  | 0.26179800  |
| C | 3.38975400  | -0.32515500 | 0.00375900  |
| H | 3.85663300  | -0.65430300 | 0.94215500  |
| H | 3.73197500  | -1.02059400 | -0.77534600 |
| H | 3.76874000  | 0.67327200  | -0.23880700 |
| N | -3.75321300 | -0.18304800 | 0.09101100  |

**Transition state**

|   |             |             |             |
|---|-------------|-------------|-------------|
| C | -1.14500400 | 1.16983700  | -0.17927900 |
| C | 0.17962700  | 1.40258000  | 0.07066700  |
| C | 0.69916500  | 0.11312500  | 0.46699400  |
| H | 0.75901100  | 2.31738300  | -0.03433900 |
| H | 0.32197900  | -0.33448100 | 1.38049300  |
| C | -1.25498000 | -0.25271400 | -0.37112100 |
| H | -1.98153600 | 1.86730400  | -0.14904300 |
| H | -0.70932500 | -0.66891000 | -1.21225900 |
| C | -2.40442800 | -1.08983900 | 0.11691300  |
| H | -3.22345700 | -1.06592100 | -0.62022500 |
| H | -2.11025400 | -2.14006800 | 0.22365700  |
| H | -2.80318700 | -0.73792400 | 1.07390200  |
| C | 2.00101900  | -0.34767800 | 0.08796900  |
| N | 3.04205500  | -0.74417800 | -0.25929100 |

**Cyclobutene (Starting material)**

|   |             |             |             |
|---|-------------|-------------|-------------|
| C | -1.13005200 | 1.17161700  | -0.44730900 |
| C | -0.08082400 | 1.51268400  | 0.31228400  |
| C | 0.37711100  | 0.07080900  | 0.52812100  |
| H | 0.33344900  | 2.44900100  | 0.67333900  |
| H | 0.24505000  | -0.29558000 | 1.55393700  |
| C | -0.84210600 | -0.32252400 | -0.41806500 |
| H | -1.92341400 | 1.74256800  | -0.92274300 |
| H | -0.48841900 | -0.71209700 | -1.38078900 |
| C | -1.89118700 | -1.25579700 | 0.17933700  |
| H | -2.76691800 | -1.31969800 | -0.47798200 |
| H | -1.49117200 | -2.26931100 | 0.30321400  |
| H | -2.23158900 | -0.89631700 | 1.15818800  |
| C | 1.71467800  | -0.29097600 | 0.06329200  |
| N | 2.77675500  | -0.57335000 | -0.31616000 |

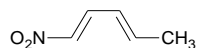

### Butadiene (Product)

|   |             |             |             |
|---|-------------|-------------|-------------|
| C | 0.10709900  | 0.75869100  | -0.05395000 |
| C | 1.56249700  | 0.72206800  | -0.13712700 |
| C | 2.34360900  | -0.34313400 | 0.13086600  |
| H | 2.03908800  | 1.66366100  | -0.40868900 |
| H | 1.87819100  | -1.27303600 | 0.46035100  |
| C | -0.71578500 | -0.30236200 | -0.11465200 |
| H | -0.43598900 | -1.33559900 | -0.26816400 |
| H | -0.36125000 | 1.73531000  | 0.04868700  |
| C | 3.83765400  | -0.35231400 | 0.03860600  |
| H | 4.28842700  | -0.60650500 | 1.00766800  |
| H | 4.17713400  | -1.11823600 | -0.67253800 |
| H | 4.23290600  | 0.61632900  | -0.28427300 |
| N | -2.15095400 | -0.14245200 | 0.00902100  |
| O | -2.81745700 | -1.18314200 | -0.05711100 |
| O | -2.62907700 | 0.98533600  | 0.16603000  |

### Transition state

|   |             |             |             |
|---|-------------|-------------|-------------|
| C | 1.51780300  | 1.20388300  | -0.07792900 |
| C | 0.18816300  | 1.40682800  | -0.34215500 |
| C | -0.31846300 | 0.07402700  | -0.46664500 |
| H | -0.37976200 | 2.32694900  | -0.44277300 |
| H | -0.03107700 | -0.58819500 | -1.27282900 |
| C | 1.61950700  | -0.14268900 | 0.41379200  |
| H | 2.36395300  | 1.85487600  | -0.29368800 |
| H | 1.07833600  | -0.36726000 | 1.32775500  |
| C | 2.74564800  | -1.08380600 | 0.09663200  |
| H | 3.21278000  | -0.86997400 | -0.86962900 |
| H | 3.51900100  | -1.01911000 | 0.87816700  |
| H | 2.39412000  | -2.12226200 | 0.09440300  |
| N | -1.66484500 | -0.25218700 | -0.00896900 |
| O | -2.27340400 | 0.59972400  | 0.64978400  |
| O | -2.10401900 | -1.37462100 | -0.28738300 |

**Cyclobutene (Starting material)**

|   |             |             |             |
|---|-------------|-------------|-------------|
| C | -1.49749700 | 1.21889300  | -0.24102900 |
| C | -0.45221100 | 1.50860800  | 0.54825100  |
| C | 0.04870900  | 0.08965400  | 0.57194400  |
| H | -0.08757900 | 2.40572700  | 1.03663000  |
| H | 0.00321800  | -0.46184400 | 1.51292600  |
| C | -1.11910800 | -0.24393800 | -0.44251700 |
| H | -2.33895700 | 1.79964300  | -0.61003300 |
| H | -0.72139500 | -0.44522000 | -1.44567300 |
| C | -2.10641300 | -1.33233400 | -0.03319700 |
| H | -2.96097200 | -1.34986800 | -0.72065600 |
| H | -1.63340700 | -2.32064400 | -0.05990600 |
| H | -2.49229000 | -1.16005000 | 0.97880900  |
| N | 1.42848000  | -0.17665800 | 0.01717600  |
| O | 1.88816800  | -1.30225300 | 0.21016800  |
| O | 1.98572400  | 0.71769900  | -0.61429700 |

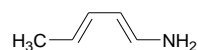**Butadiene (Product)**

|   |             |             |             |
|---|-------------|-------------|-------------|
| C | -0.75886200 | 0.73702600  | 0.06324600  |
| C | 0.70037000  | 0.71345000  | -0.06343200 |
| C | 1.52423000  | -0.32633300 | 0.16763600  |
| H | 1.15458300  | 1.65885300  | -0.37033700 |
| H | 1.10513200  | -1.26393200 | 0.53788400  |
| C | -1.57373000 | -0.32296400 | -0.12542100 |
| H | -1.21014100 | 1.70390600  | 0.29391400  |
| H | -1.16407400 | -1.28117900 | -0.43794000 |
| N | -2.96593400 | -0.30789900 | -0.05356700 |
| H | -3.40878200 | -1.19546300 | 0.14571700  |
| H | -3.37617500 | 0.45094300  | 0.47874900  |
| C | 3.01263100  | -0.30274100 | -0.03999200 |
| H | 3.35531600  | 0.68584300  | -0.36766200 |
| H | 3.55196100  | -0.56097300 | 0.88256600  |
| H | 3.32589000  | -1.03332500 | -0.80014600 |

**Transition state**

|   |             |             |             |
|---|-------------|-------------|-------------|
| C | 0.74474700  | 1.19651000  | 0.10799200  |
| C | -0.61250300 | 1.21743900  | -0.09368400 |
| C | -0.98359900 | -0.14558000 | -0.36139000 |
| H | -1.29746000 | 2.05664800  | 0.04624400  |
| H | -0.59497700 | -0.57058900 | -1.28380100 |
| C | 1.03453100  | -0.19195000 | 0.36704800  |
| H | 1.48524800  | 1.99262400  | 0.02626300  |
| H | 0.67302200  | -0.62432900 | 1.29362500  |
| N | 2.19829700  | -0.79768700 | -0.10217700 |
| H | 2.45014300  | -0.61451700 | -1.06585200 |
| H | 2.36092700  | -1.76026800 | 0.16522700  |
| C | -2.27924300 | -0.76265100 | 0.11679800  |
| H | -3.14323700 | -0.36731900 | -0.44379100 |
| H | -2.28042200 | -1.85060100 | -0.02236400 |
| H | -2.46492400 | -0.56045100 | 1.17910600  |

**Cyclobutene (Starting material)**

|   |             |             |             |
|---|-------------|-------------|-------------|
| C | 0.67108700  | 1.28325300  | 0.31672200  |
| C | -0.50606800 | 1.34321400  | -0.32246200 |
| C | -0.67647700 | -0.16736100 | -0.41467900 |
| H | -1.13665000 | 2.16679600  | -0.65241600 |
| H | -0.53132800 | -0.55073800 | -1.43293900 |
| C | 0.68419200  | -0.23443200 | 0.38817200  |
| H | 1.37510800  | 2.03189100  | 0.67387100  |
| H | 0.52555000  | -0.61805600 | 1.41187400  |
| N | 1.79028700  | -0.89014400 | -0.31248800 |
| H | 2.68324100  | -0.62309500 | 0.09974000  |
| H | 1.71955600  | -1.90392800 | -0.23098000 |
| C | -1.91502600 | -0.79294200 | 0.22480500  |
| H | -1.84484300 | -1.88852200 | 0.23929200  |
| H | -2.04740300 | -0.44662200 | 1.25765700  |
| H | -2.82148800 | -0.52711700 | -0.33402900 |

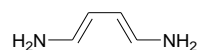**Butadiene (Product)**

|   |             |             |             |
|---|-------------|-------------|-------------|
| C | -0.72591400 | 0.74478200  | 0.09238500  |
| C | 0.73026700  | 0.74580600  | -0.05810100 |
| C | 1.53810300  | -0.30484900 | 0.19631100  |
| H | 1.18580600  | 1.67491000  | -0.41043100 |
| H | 1.13171900  | -1.21962100 | 0.62553100  |
| C | -1.53428500 | -0.30197500 | -0.17842100 |
| H | -1.18283400 | 1.67683400  | 0.43348700  |
| H | -1.12625300 | -1.21192500 | -0.61326500 |
| N | -2.92940100 | -0.31681200 | -0.04832800 |
| H | -3.33963500 | -1.23146300 | 0.09359400  |
| H | -3.31214700 | 0.36273100  | 0.59980900  |
| N | 2.90051100  | -0.39323000 | -0.12420100 |
| H | 3.32635300  | 0.48598600  | -0.40116200 |
| H | 3.47019800  | -0.86973600 | 0.56710200  |

**Transition state**

|   |             |             |             |
|---|-------------|-------------|-------------|
| C | 0.67777600  | 1.20036100  | 0.12904100  |
| C | -0.67458300 | 1.21031600  | -0.10870000 |
| C | -0.97938300 | -0.17615000 | -0.36395900 |
| H | -1.39394700 | 2.02471400  | -0.01399600 |
| H | -0.63799600 | -0.60071000 | -1.30283800 |
| C | 0.97661100  | -0.19056400 | 0.36887300  |
| H | 1.40367600  | 2.01103800  | 0.03390800  |
| H | 0.64468700  | -0.63428100 | 1.30225400  |
| N | 2.10207800  | -0.83617700 | -0.17868400 |
| H | 2.65401700  | -0.28477700 | -0.82598400 |
| H | 2.67803700  | -1.38305100 | 0.45181800  |
| N | -2.18967200 | -0.74762800 | 0.08081000  |
| H | -2.32979300 | -1.71949400 | -0.17006500 |
| H | -2.40805200 | -0.59057400 | 1.05849900  |

**Cyclobutene (Starting material)**

|   |             |             |             |
|---|-------------|-------------|-------------|
| C | 0.61331200  | 1.31588300  | 0.27704500  |
| C | -0.59415600 | 1.32430700  | -0.30762800 |
| C | -0.68826900 | -0.20111800 | -0.38524600 |
| H | -1.26818800 | 2.11745500  | -0.62681300 |
| H | -0.55184300 | -0.58880000 | -1.40069300 |
| C | 0.68381800  | -0.20012100 | 0.38744600  |
| H | 1.31369100  | 2.09454800  | 0.56995300  |
| H | 0.54022700  | -0.56150400 | 1.42048800  |
| N | 1.79527200  | -0.84920800 | -0.30864800 |
| H | 2.68232000  | -0.61311500 | 0.13458800  |
| H | 1.69904300  | -1.86287900 | -0.25468900 |
| N | -1.77491500 | -0.94284900 | 0.24344300  |
| H | -2.60390200 | -0.95518200 | -0.34733100 |
| H | -2.04207200 | -0.51983400 | 1.13123600  |

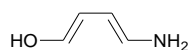**Butadiene (Product)**

|   |             |             |             |
|---|-------------|-------------|-------------|
| C | -0.74366800 | 0.75242100  | 0.09219400  |
| C | 0.71064100  | 0.75515500  | -0.06427400 |
| C | 1.51166700  | -0.30227700 | 0.18710900  |
| H | 1.16594200  | 1.68518900  | -0.41152800 |
| H | 1.09801300  | -1.21321100 | 0.61685700  |
| C | -1.53662000 | -0.29315900 | -0.18991700 |
| H | -1.21938500 | 1.66093500  | 0.46211000  |
| H | -1.15879600 | -1.21018100 | -0.64059000 |
| O | -2.88153200 | -0.27803800 | 0.11229100  |
| H | -3.33592500 | -0.97189800 | -0.38668400 |
| N | 2.87179200  | -0.39616700 | -0.12183700 |
| H | 3.31369600  | 0.47780100  | -0.38826900 |
| H | 3.43404600  | -0.90400700 | 0.55196800  |

**Transition state**

|   |             |            |             |
|---|-------------|------------|-------------|
| C | -0.64732000 | 1.20405200 | -0.10170300 |
|---|-------------|------------|-------------|



|   |             |             |             |
|---|-------------|-------------|-------------|
| C | 0.71592900  | 1.18728400  | 0.08514500  |
| C | 0.98482200  | -0.19527500 | 0.33323100  |
| H | 1.45043500  | 1.98229300  | -0.03564600 |
| H | 0.66538400  | -0.63661100 | 1.27365300  |
| C | -0.98017400 | -0.17064400 | -0.36972300 |
| H | -1.35717700 | 2.02001900  | 0.04604800  |
| H | -0.65091900 | -0.60650100 | -1.30667400 |
| N | -2.10138100 | -0.80704900 | 0.17926800  |
| H | -2.64450200 | -0.27162900 | 0.84613900  |
| H | -2.67273900 | -1.37473500 | -0.43544500 |
| O | 2.14034300  | -0.75494900 | -0.19906600 |
| H | 2.35689400  | -1.57641200 | 0.26787700  |

### Cyclobutene (Starting material)

|   |             |             |             |
|---|-------------|-------------|-------------|
| C | -0.53121700 | 1.34299700  | -0.27868000 |
| C | 0.69298400  | 1.27875400  | 0.26990800  |
| C | 0.69334100  | -0.23015900 | 0.37142300  |
| H | 1.43632000  | 2.01626000  | 0.55859300  |
| H | 0.56862600  | -0.61003600 | 1.39670900  |
| C | -0.69116900 | -0.17553100 | -0.38918100 |
| H | -1.19159800 | 2.16720300  | -0.54105500 |
| H | -0.57261800 | -0.54853900 | -1.41207900 |
| N | -1.80002700 | -0.88784800 | 0.23122000  |
| H | -2.06719800 | -0.45997900 | 1.11646200  |
| H | -2.62417300 | -0.89352900 | -0.36579300 |
| O | 1.79250300  | -0.86623300 | -0.26228700 |
| H | 1.72716400  | -1.82295000 | -0.11390300 |

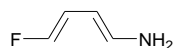

### Butadiene (Product)

|   |             |             |             |
|---|-------------|-------------|-------------|
| C | -0.68615100 | 0.74432700  | 0.08045600  |
| C | 0.76681500  | 0.70959100  | -0.09719200 |
| C | 1.54296100  | -0.33443000 | 0.20471300  |
| H | 1.25690600  | 1.60020800  | -0.49082000 |
| H | 1.23795800  | -1.26467000 | 0.67189400  |

|   |             |             |             |
|---|-------------|-------------|-------------|
| C | -1.50957500 | -0.29750500 | -0.16649700 |
| H | -1.11660900 | 1.69285200  | 0.40488500  |
| H | -1.11176500 | -1.22106400 | -0.58180500 |
| N | -2.89406900 | -0.29348900 | -0.03371500 |
| H | -3.33923400 | -1.19626700 | 0.06189300  |
| H | -3.28900600 | 0.40203100  | 0.58811900  |
| F | 2.88177000  | -0.32117400 | -0.06078200 |

**Transition state**

|   |             |             |             |
|---|-------------|-------------|-------------|
| C | -0.60768100 | 1.19944100  | -0.08627300 |
| C | 0.76006800  | 1.13758800  | 0.06768700  |
| C | 0.98597000  | -0.23889600 | 0.33068400  |
| H | 1.51215900  | 1.91538300  | -0.05258300 |
| H | 0.70876400  | -0.69941800 | 1.27303500  |
| C | -1.01037200 | -0.15006600 | -0.37307700 |
| H | -1.28609200 | 2.03293600  | 0.09423900  |
| H | -0.69047100 | -0.58836400 | -1.31118400 |
| N | -2.20526700 | -0.67669200 | 0.10441800  |
| H | -2.43910300 | -0.49385000 | 1.07228100  |
| H | -2.45303600 | -1.61252300 | -0.18952600 |
| F | 2.14630400  | -0.83396900 | -0.13903500 |

**Cyclobutene (Starting material)**

|   |             |             |             |
|---|-------------|-------------|-------------|
| C | 0.45939000  | 1.33646200  | 0.27338000  |
| C | -0.76054600 | 1.23587800  | -0.27740800 |
| C | -0.68227900 | -0.26373000 | -0.38824500 |
| H | -1.52022400 | 1.95055800  | -0.57918100 |
| H | -0.58537100 | -0.67898800 | -1.39532200 |
| C | 0.67836000  | -0.16581200 | 0.38658000  |
| H | 1.09882500  | 2.17763000  | 0.53054600  |
| H | 0.55276700  | -0.53908500 | 1.41488900  |
| N | 1.84385200  | -0.70238500 | -0.31077200 |
| H | 2.69879900  | -0.25480900 | 0.01486700  |
| H | 1.94470400  | -1.70140400 | -0.13775600 |
| F | -1.69622400 | -0.98822100 | 0.26239100  |

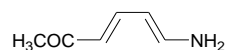

### Butadiene (Product)

|   |             |             |             |
|---|-------------|-------------|-------------|
| C | -1.62941100 | 0.75423900  | -0.06146200 |
| C | -0.18256900 | 0.71747700  | -0.03928200 |
| C | 0.63623800  | -0.36719300 | -0.07215500 |
| H | 0.28665100  | 1.69959100  | 0.00793700  |
| H | 0.23760500  | -1.37658900 | -0.15579700 |
| C | -2.44147100 | -0.32779400 | 0.07226300  |
| H | -2.08985300 | 1.73455000  | -0.18244500 |
| H | -2.02011000 | -1.31653500 | 0.23765300  |
| N | -3.80980200 | -0.32166000 | -0.02779100 |
| H | -4.33043000 | -1.08511000 | 0.38008300  |
| H | -4.29396700 | 0.56730900  | -0.03176100 |
| C | 2.10192300  | -0.31994100 | -0.00814100 |
| O | 2.75497300  | -1.36458700 | -0.02904400 |
| C | 2.82005700  | 1.02253400  | 0.08364300  |
| H | 2.53842200  | 1.56230700  | 0.99623900  |
| H | 3.89681300  | 0.84063900  | 0.09598000  |
| H | 2.57509600  | 1.66622000  | -0.77019600 |

### Transition state

|   |             |             |             |
|---|-------------|-------------|-------------|
| C | -1.73277600 | -1.08476100 | -0.08758200 |
| C | -0.46958900 | -1.40218800 | -0.46613200 |
| C | 0.25237400  | -0.13636200 | -0.51021700 |
| H | -0.04131500 | -2.38735900 | -0.63918900 |
| H | -0.01366400 | 0.55903900  | -1.30420800 |
| C | -1.61784300 | 0.27044300  | 0.44017600  |
| H | -2.66007100 | -1.65420900 | -0.14001600 |
| H | -1.11416900 | 0.40736000  | 1.39098000  |
| N | -2.54793900 | 1.23688400  | 0.16397900  |
| H | -2.99032200 | 1.24637900  | -0.74598700 |
| H | -2.48513600 | 2.13869700  | 0.61732400  |
| C | 1.60452400  | -0.00597700 | 0.04053800  |
| C | 2.39024100  | 1.25797900  | -0.28686400 |
| H | 3.15588900  | 1.42834900  | 0.47467000  |

|   |            |             |             |
|---|------------|-------------|-------------|
| H | 2.89274400 | 1.13317700  | -1.25599300 |
| H | 1.74028700 | 2.13771500  | -0.36651300 |
| O | 2.09871800 | -0.88276700 | 0.75519600  |

### Cyclobutene (Starting material)

|   |             |             |             |
|---|-------------|-------------|-------------|
| C | 0.55445000  | 1.39892000  | -0.71149800 |
| C | 1.56191300  | 1.20492200  | 0.15070200  |
| C | 1.17038200  | -0.22777800 | 0.46914600  |
| H | 2.37712300  | 1.82708300  | 0.51207900  |
| H | 0.75931000  | -0.34775900 | 1.48690000  |
| C | 0.01792700  | -0.02146200 | -0.61137000 |
| H | 0.22931200  | 2.25307000  | -1.30094500 |
| H | 0.20725700  | -0.64704400 | -1.48943300 |
| C | -1.39239800 | -0.30235200 | -0.11436200 |
| O | -1.91496700 | -1.38412100 | -0.33553200 |
| C | -2.10330200 | 0.77412600  | 0.68208300  |
| H | -1.45876600 | 1.16588200  | 1.47858900  |
| H | -2.34121100 | 1.62333200  | 0.02743000  |
| H | -3.02786800 | 0.37579600  | 1.10576200  |
| N | 2.14239100  | -1.25282900 | 0.10502400  |
| H | 1.75177600  | -2.18362100 | 0.24779300  |
| H | 2.97222400  | -1.18222300 | 0.69270300  |

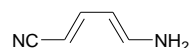

### Butadiene (Product)

|   |             |             |             |
|---|-------------|-------------|-------------|
| C | 1.11938600  | 0.75430000  | -0.02198900 |
| C | -0.32542400 | 0.73314700  | 0.02104700  |
| C | -1.14984800 | -0.33769100 | -0.13401700 |
| H | -0.79926800 | 1.69849000  | 0.19366600  |
| H | -0.76767100 | -1.32848700 | -0.36859400 |
| C | 1.91847400  | -0.34052100 | 0.07993900  |
| H | 1.58670100  | 1.73335500  | -0.12055800 |
| H | 1.48661400  | -1.32443400 | 0.25009600  |
| N | 3.28343100  | -0.35458000 | -0.05207600 |
| C | -2.56268100 | -0.23074000 | -0.01361200 |

|   |             |             |             |
|---|-------------|-------------|-------------|
| N | -3.72463300 | -0.16794700 | 0.07788600  |
| H | 3.80350600  | -1.12004600 | 0.35328800  |
| H | 3.77909200  | 0.52784100  | -0.07676400 |

**Transition state**

|   |             |             |             |
|---|-------------|-------------|-------------|
| C | -1.19716900 | 1.12843700  | -0.22490400 |
| C | 0.09720000  | 1.39335700  | 0.09275600  |
| C | 0.65566700  | 0.10553500  | 0.48513000  |
| H | 0.63692600  | 2.33581300  | 0.01905900  |
| H | 0.32203000  | -0.31758100 | 1.42859000  |
| C | -1.24015700 | -0.31901600 | -0.38307500 |
| H | -2.05451400 | 1.79333100  | -0.31779700 |
| H | -0.75146100 | -0.75349300 | -1.24803100 |
| N | -2.27569500 | -1.07204800 | 0.10182300  |
| H | -2.71296400 | -0.80419200 | 0.97407300  |
| H | -2.31377200 | -2.06093600 | -0.10670600 |
| C | 1.96684300  | -0.30614300 | 0.09686600  |
| N | 3.01561800  | -0.67166100 | -0.26608400 |

**Cyclobutene (Starting material)**

|   |             |             |             |
|---|-------------|-------------|-------------|
| C | -1.19532600 | 1.11119900  | -0.42578300 |
| C | -0.13199700 | 1.50037600  | 0.28798900  |
| C | 0.37583300  | 0.08142200  | 0.53123200  |
| H | 0.26922800  | 2.46049800  | 0.59779000  |
| H | 0.23785000  | -0.27671100 | 1.55719600  |
| C | -0.84736000 | -0.36600700 | -0.39085200 |
| H | -2.02311900 | 1.64237000  | -0.88815400 |
| H | -0.48858700 | -0.74885900 | -1.35854000 |
| N | -1.81030900 | -1.23323600 | 0.27101900  |
| H | -2.75027300 | -1.07682800 | -0.08638600 |
| H | -1.58779400 | -2.21683900 | 0.12957900  |
| C | 1.71978900  | -0.25046700 | 0.06420000  |
| N | 2.78417400  | -0.51573200 | -0.32133300 |

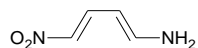

### Butadiene (Product)

|   |             |             |             |
|---|-------------|-------------|-------------|
| C | 1.57609700  | 0.75149900  | -0.02943200 |
| C | 0.13813400  | 0.74495500  | -0.01630600 |
| C | -0.69829400 | -0.32032100 | -0.03318500 |
| H | -0.34661100 | 1.71837700  | 0.00804000  |
| H | -0.42701300 | -1.36587300 | -0.07962100 |
| C | 2.36741400  | -0.35777100 | 0.03504000  |
| H | 2.05471800  | 1.72745600  | -0.08763400 |
| H | 1.92692800  | -1.34833500 | 0.11965500  |
| N | 3.72692100  | -0.36663500 | -0.02116800 |
| H | 4.24781400  | 0.50012300  | -0.01257700 |
| H | 4.24476900  | -1.20435900 | 0.19626300  |
| N | -2.12083200 | -0.13995300 | 0.00246300  |
| O | -2.59994500 | 1.00245900  | 0.05118300  |
| O | -2.80547200 | -1.17639000 | -0.01991900 |

### Transition state

|   |             |             |             |
|---|-------------|-------------|-------------|
| C | 1.56169900  | 1.16032900  | -0.04603600 |
| C | 0.26943900  | 1.37714900  | -0.40237300 |
| C | -0.29176600 | 0.04680800  | -0.50266200 |
| H | -0.25322400 | 2.31669000  | -0.56063100 |
| H | -0.05091300 | -0.60855600 | -1.33078000 |
| C | 1.58596700  | -0.21527100 | 0.43950300  |
| H | 2.43314600  | 1.80894500  | -0.11484600 |
| H | 1.09327800  | -0.43585500 | 1.38017000  |
| N | 2.58456400  | -1.08346600 | 0.12105700  |
| H | 3.04862000  | -1.00807000 | -0.77492000 |
| H | 2.61764200  | -1.99809100 | 0.55140300  |
| N | -1.61987600 | -0.21258200 | -0.01573000 |
| O | -2.15323000 | 0.64656500  | 0.70683500  |
| O | -2.14594500 | -1.29866700 | -0.30912100 |

**Cyclobutene (Starting material)**

|   |             |             |             |
|---|-------------|-------------|-------------|
| C | -1.53037900 | 1.17028500  | -0.28915000 |
| C | -0.46736600 | 1.52373300  | 0.44795600  |
| C | 0.04409700  | 0.11429400  | 0.56224000  |
| H | -0.09701700 | 2.45885300  | 0.85277400  |
| H | -0.01710800 | -0.38395100 | 1.53102200  |
| C | -1.13125200 | -0.29216900 | -0.41367300 |
| H | -2.39059700 | 1.71183200  | -0.67348200 |
| H | -0.74014800 | -0.54776400 | -1.41129700 |
| N | -2.06178700 | -1.26781500 | 0.13092200  |
| H | -2.98492800 | -1.16008400 | -0.28475700 |
| H | -1.74943100 | -2.21889200 | -0.05715400 |
| N | 1.42409100  | -0.17830800 | 0.02697100  |
| O | 2.07804500  | 0.74782900  | -0.44624100 |
| O | 1.79101800  | -1.35207900 | 0.08291700  |

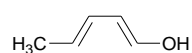**Butadiene (Product)**

|   |             |             |             |
|---|-------------|-------------|-------------|
| C | -0.77624600 | 0.74210400  | 0.07351500  |
| C | 0.68114800  | 0.72021800  | -0.08265700 |
| C | 1.49991600  | -0.31373300 | 0.18424800  |
| H | 1.12907900  | 1.64971700  | -0.44130000 |
| H | 1.07759500  | -1.22475900 | 0.61179700  |
| C | -1.57660500 | -0.31066500 | -0.15078800 |
| H | -1.24277400 | 1.68170000  | 0.36764800  |
| H | -1.19907500 | -1.26284700 | -0.52076900 |
| O | -2.92752200 | -0.25056500 | 0.08972200  |
| H | -3.36646300 | -1.02135200 | -0.29741600 |
| C | 2.98492100  | -0.31360500 | -0.04484300 |
| H | 3.33129400  | 0.65148300  | -0.43227200 |
| H | 3.53282400  | -0.52562800 | 0.88388900  |
| H | 3.27889300  | -1.08970300 | -0.76620500 |

**Transition state**

|   |             |             |             |
|---|-------------|-------------|-------------|
| C | 0.78584000  | 1.17388600  | 0.07882500  |
| C | -0.58322700 | 1.22059300  | -0.06208900 |
| C | -0.98397200 | -0.12196600 | -0.36076700 |
| H | -1.25154300 | 2.05825700  | 0.14453200  |
| H | -0.60069500 | -0.53802400 | -1.28829900 |
| C | 1.03729900  | -0.20865400 | 0.33041600  |
| H | 1.54172500  | 1.94857000  | -0.03757600 |
| H | 0.69289600  | -0.65699700 | 1.25726100  |
| O | 2.15536200  | -0.80217900 | -0.21305100 |
| H | 2.37160000  | -1.61936600 | 0.26309200  |
| C | -2.27654100 | -0.74019800 | 0.12149500  |
| H | -3.12747900 | -0.41002000 | -0.49646300 |
| H | -2.24376600 | -1.83442400 | 0.05394300  |
| H | -2.50202600 | -0.47253200 | 1.16063600  |

### Cyclobutene (Starting material)

|   |             |             |             |
|---|-------------|-------------|-------------|
| C | 0.74764100  | 1.25079800  | 0.30601500  |
| C | -0.44915500 | 1.36061400  | -0.29139900 |
| C | -0.67576800 | -0.14157900 | -0.41643600 |
| H | -1.06983900 | 2.21095400  | -0.56629500 |
| H | -0.54502300 | -0.50574600 | -1.44368100 |
| C | 0.69467200  | -0.25748500 | 0.37205300  |
| H | 1.49363900  | 1.96060200  | 0.65279200  |
| H | 0.55661700  | -0.65699400 | 1.38913200  |
| O | 1.78629500  | -0.90569900 | -0.26787500 |
| H | 1.71623600  | -1.86254400 | -0.12407000 |
| C | -1.92938400 | -0.74530100 | 0.21442300  |
| H | -1.89502100 | -1.84256900 | 0.19783900  |
| H | -2.04335800 | -0.42436900 | 1.25779900  |
| H | -2.83164800 | -0.43602500 | -0.32844800 |

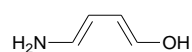

### Butadiene (Product)

|   |             |            |             |
|---|-------------|------------|-------------|
| C | -0.74366800 | 0.75242100 | 0.09219400  |
| C | 0.71064100  | 0.75515500 | -0.06427400 |



|   |             |             |             |
|---|-------------|-------------|-------------|
| C | 1.51166700  | -0.30227700 | 0.18710900  |
| H | 1.16594200  | 1.68518900  | -0.41152800 |
| H | 1.09801300  | -1.21321100 | 0.61685700  |
| C | -1.53662000 | -0.29315900 | -0.18991700 |
| H | -1.21938500 | 1.66093500  | 0.46211000  |
| H | -1.15879600 | -1.21018100 | -0.64059000 |
| O | -2.88153200 | -0.27803800 | 0.11229100  |
| H | -3.33592500 | -0.97189800 | -0.38668400 |
| N | 2.87179200  | -0.39616700 | -0.12183700 |
| H | 3.31369600  | 0.47780100  | -0.38826900 |
| H | 3.43404600  | -0.90400700 | 0.55196800  |

**Transition state**

|   |             |             |             |
|---|-------------|-------------|-------------|
| C | -0.64732000 | 1.20405200  | -0.10170300 |
| C | 0.71592900  | 1.18728400  | 0.08514500  |
| C | 0.98482200  | -0.19527500 | 0.33323100  |
| H | 1.45043500  | 1.98229300  | -0.03564600 |
| H | 0.66538400  | -0.63661100 | 1.27365300  |
| C | -0.98017400 | -0.17064400 | -0.36972300 |
| H | -1.35717700 | 2.02001900  | 0.04604800  |
| H | -0.65091900 | -0.60650100 | -1.30667400 |
| N | -2.10138100 | -0.80704900 | 0.17926800  |
| H | -2.64450200 | -0.27162900 | 0.84613900  |
| H | -2.67273900 | -1.37473500 | -0.43544500 |
| O | 2.14034300  | -0.75494900 | -0.19906600 |
| H | 2.35689400  | -1.57641200 | 0.26787700  |

**Cyclobutene (Starting material)**

|   |             |             |             |
|---|-------------|-------------|-------------|
| C | 0.69276400  | 1.27877100  | 0.27000500  |
| C | -0.53133300 | 1.34282500  | -0.27882900 |
| C | -0.69111900 | -0.17563200 | -0.38926600 |
| H | -1.19175400 | 2.16692800  | -0.54146600 |
| H | -0.57283700 | -0.54894400 | -1.41211300 |
| C | 0.69339100  | -0.23016600 | 0.37144300  |
| H | 1.43579300  | 2.01644700  | 0.55902300  |
| H | 0.56860100  | -0.61022700 | 1.39663300  |
| O | 1.79267400  | -0.86596800 | -0.26233400 |

|   |             |             |             |
|---|-------------|-------------|-------------|
| H | 1.72790100  | -1.82265400 | -0.11354800 |
| N | -1.79997100 | -0.88781800 | 0.23138000  |
| H | -2.62393100 | -0.89443400 | -0.36587600 |
| H | -2.06758400 | -0.45943800 | 1.11624400  |

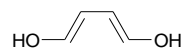

### Butadiene (Product)

|   |             |             |             |
|---|-------------|-------------|-------------|
| C | 0.71643700  | 0.74507100  | -0.09459800 |
| C | -0.73750300 | 0.72177500  | 0.08782400  |
| C | -1.52183700 | -0.33206300 | -0.19763100 |
| H | -1.20374700 | 1.63428100  | 0.46763200  |
| H | -1.14843200 | -1.24101300 | -0.65854000 |
| C | 1.52665000  | -0.28435400 | 0.19355500  |
| H | 1.16868400  | 1.65612800  | -0.48577700 |
| H | 1.16395300  | -1.20099200 | 0.65702800  |
| O | 2.86762000  | -0.24871200 | -0.10835000 |
| H | 3.32804800  | -0.96403200 | 0.35322700  |
| O | -2.87055300 | -0.42261200 | 0.01759400  |
| H | -3.18752800 | 0.38364900  | 0.45758000  |

### Transition state

|   |             |             |             |
|---|-------------|-------------|-------------|
| C | -0.68694000 | 1.18079100  | -0.06025100 |
| C | 0.68702100  | 1.18076200  | 0.06023600  |
| C | 1.00140000  | -0.18223400 | 0.33425100  |
| H | 1.40396700  | 1.98029900  | -0.11854600 |
| H | 0.69611400  | -0.62005500 | 1.27988300  |
| C | -1.00145400 | -0.18216100 | -0.33432000 |
| H | -1.40384300 | 1.98035300  | 0.11860600  |
| H | -0.69605500 | -0.62019100 | -1.27981400 |
| O | -2.14849700 | -0.72986500 | 0.21419300  |
| H | -2.42127200 | -1.51255200 | -0.28911400 |
| O | 2.14853100  | -0.72983800 | -0.21407800 |
| H | 2.42066300  | -1.51317300 | 0.28856600  |

**Cyclobutene (Starting material)**

|   |             |             |             |
|---|-------------|-------------|-------------|
| C | -0.68694000 | 1.18079100  | -0.06025100 |
| C | 0.68702100  | 1.18076200  | 0.06023600  |
| C | 1.00140000  | -0.18223400 | 0.33425100  |
| H | 1.40396700  | 1.98029900  | -0.11854600 |
| H | 0.69611400  | -0.62005500 | 1.27988300  |
| C | -1.00145400 | -0.18216100 | -0.33432000 |
| H | -1.40384300 | 1.98035300  | 0.11860600  |
| H | -0.69605500 | -0.62019100 | -1.27981400 |
| O | -2.14849700 | -0.72986500 | 0.21419300  |
| H | -2.42127200 | -1.51255200 | -0.28911400 |
| O | 2.14853100  | -0.72983800 | -0.21407800 |
| H | 2.42066300  | -1.51317300 | 0.28856600  |

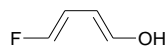**Butadiene (Product)**

|   |             |             |             |
|---|-------------|-------------|-------------|
| C | -0.70362300 | 0.74663100  | 0.09016500  |
| C | 0.74777900  | 0.71505800  | -0.10590700 |
| C | 1.51881800  | -0.32990500 | 0.20302200  |
| H | 1.23272700  | 1.60094200  | -0.51453900 |
| H | 1.20885900  | -1.24977600 | 0.68726100  |
| C | -1.51296900 | -0.28908400 | -0.17862400 |
| H | -1.14978300 | 1.66863000  | 0.45989800  |
| H | -1.14735100 | -1.21263700 | -0.62529200 |
| O | -2.85292300 | -0.24225900 | 0.10497500  |
| H | -3.30838500 | -0.98412000 | -0.31820300 |
| F | 2.85414300  | -0.32679600 | -0.06453900 |

**Transition state**

|   |             |             |             |
|---|-------------|-------------|-------------|
| C | -0.64660400 | 1.17812000  | -0.05940500 |
| C | 0.73190600  | 1.14076900  | 0.03840700  |
| C | 0.98952600  | -0.21804400 | 0.33429500  |
| H | 1.46907100  | 1.92005700  | -0.14264700 |
| H | 0.70911300  | -0.67666300 | 1.27525100  |
| C | -1.01465400 | -0.16726100 | -0.34012800 |

|   |             |             |             |
|---|-------------|-------------|-------------|
| H | -1.33771200 | 1.99086800  | 0.15454500  |
| H | -0.70905100 | -0.62621100 | -1.27440600 |
| O | -2.16192500 | -0.67922700 | 0.21493600  |
| H | -2.45190500 | -1.46868300 | -0.26850200 |
| F | 2.13942700  | -0.81189500 | -0.14475000 |

### Cyclobutene (Starting material)

|   |             |             |             |
|---|-------------|-------------|-------------|
| C | -0.52583200 | 1.31846400  | -0.26536800 |
| C | 0.71385300  | 1.25446500  | 0.24943500  |
| C | 0.68176200  | -0.24421700 | 0.39039300  |
| H | 1.47024700  | 1.99040400  | 0.50283300  |
| H | 0.60406800  | -0.64289100 | 1.40612800  |
| C | -0.69324800 | -0.18225500 | -0.37050500 |
| H | -1.20270300 | 2.13093000  | -0.51255800 |
| H | -0.59913000 | -0.57463400 | -1.39170000 |
| O | -1.84333000 | -0.69344400 | 0.27758100  |
| H | -1.95903200 | -1.62678600 | 0.04015600  |
| F | 1.70821900  | -0.95646800 | -0.25436000 |

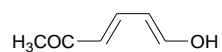

### Butadiene (Product)

|   |             |             |             |
|---|-------------|-------------|-------------|
| C | 0.20019200  | 0.70630900  | -0.06129500 |
| C | 1.65445100  | 0.71397300  | -0.10936100 |
| C | 2.44419000  | -0.35733100 | 0.11515400  |
| H | 2.12950500  | 1.67427400  | -0.31445900 |
| H | 2.05985000  | -1.33637200 | 0.38241300  |
| C | -0.62431800 | -0.36775200 | -0.10392000 |
| H | -0.25132100 | 1.69505700  | 0.00904600  |
| H | -0.23492500 | -1.37736200 | -0.21966400 |
| C | -2.09460500 | -0.30862500 | -0.01161100 |
| O | -2.74887300 | -1.34904400 | -0.04320500 |
| C | -2.79745900 | 1.03617400  | 0.12097900  |
| H | -2.49352400 | 1.55281900  | 1.03968200  |
| H | -2.55982800 | 1.69490000  | -0.72337000 |
| H | -3.87557400 | 0.86518500  | 0.14837800  |

|   |            |             |             |
|---|------------|-------------|-------------|
| O | 3.79788600 | -0.37624100 | 0.06472300  |
| H | 4.13900700 | 0.49728800  | -0.19384600 |

**Transition state**

|   |             |             |             |
|---|-------------|-------------|-------------|
| C | -0.47655800 | -1.38695800 | -0.43647900 |
| C | -1.76430100 | -1.04333900 | -0.14298800 |
| C | -1.64409900 | 0.28212900  | 0.40256800  |
| H | -2.70050400 | -1.57978900 | -0.28133300 |
| H | -1.14900800 | 0.42617400  | 1.35794100  |
| C | 0.25182100  | -0.13765400 | -0.49341600 |
| H | -0.04200600 | -2.37882900 | -0.53632100 |
| H | -0.01784100 | 0.55977500  | -1.28297800 |
| C | 1.61771900  | -0.01173500 | 0.05131600  |
| O | 2.09802300  | -0.88545500 | 0.77329400  |
| C | 2.41054000  | 1.23634600  | -0.30497400 |
| H | 2.75673800  | 1.16936500  | -1.34547900 |
| H | 1.79241900  | 2.13969300  | -0.23006500 |
| H | 3.28089100  | 1.32609000  | 0.34940700  |
| O | -2.56790000 | 1.22680100  | 0.07851700  |
| H | -2.53240600 | 1.97401600  | 0.69816700  |

**Cyclobutene (Starting material)**

|   |             |             |             |
|---|-------------|-------------|-------------|
| C | 0.58641700  | 1.41087900  | -0.65475500 |
| C | 1.61419000  | 1.15925900  | 0.16968800  |
| C | 1.18447600  | -0.25923600 | 0.46008300  |
| H | 2.45677600  | 1.73902600  | 0.53540300  |
| H | 0.79145800  | -0.41247900 | 1.47652300  |
| C | 0.01964400  | -0.00102900 | -0.61147700 |
| H | 0.25732200  | 2.30332800  | -1.18111400 |
| H | 0.20891400  | -0.59859800 | -1.50881200 |
| C | -1.39048600 | -0.28954000 | -0.12568700 |
| O | -1.88452800 | -1.39176700 | -0.31176900 |
| C | -2.12938800 | 0.79655600  | 0.63043200  |
| H | -1.51444900 | 1.18915600  | 1.45035000  |
| H | -2.33624100 | 1.64362500  | -0.03729700 |
| H | -3.07081100 | 0.40529800  | 1.02213700  |
| O | 2.14774800  | -1.23990900 | 0.14572400  |

|   |            |             |            |
|---|------------|-------------|------------|
| H | 1.79215300 | -2.11727800 | 0.36147100 |
|---|------------|-------------|------------|

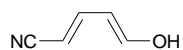

### Butadiene (Product)

|   |             |             |             |
|---|-------------|-------------|-------------|
| C | -1.13957700 | 0.75048200  | 0.05428100  |
| C | 0.30990300  | 0.74326400  | -0.03133500 |
| C | 1.13120400  | -0.31396100 | 0.18548400  |
| H | 0.77229400  | 1.69570500  | -0.28614200 |
| H | 0.74834600  | -1.27748500 | 0.51401300  |
| C | -1.91851800 | -0.33616900 | -0.10728400 |
| H | -1.62928300 | 1.70759600  | 0.21991200  |
| H | -1.51420900 | -1.31533400 | -0.35919200 |
| O | -3.26967200 | -0.25978700 | 0.02567800  |
| H | -3.68547200 | -1.09569700 | -0.23207000 |
| C | 2.54299700  | -0.23034400 | 0.01752600  |
| N | 3.70137800  | -0.18801700 | -0.11056800 |

### Transition state

|   |             |             |             |
|---|-------------|-------------|-------------|
| C | -1.23442800 | 1.09977100  | -0.18547000 |
| C | 0.08036600  | 1.38089800  | 0.05652400  |
| C | 0.65675900  | 0.12204000  | 0.47969300  |
| H | 0.61946700  | 2.31367800  | -0.09485900 |
| H | 0.31688900  | -0.29982500 | 1.42030600  |
| C | -1.25542300 | -0.32916200 | -0.34379800 |
| H | -2.10775000 | 1.74701800  | -0.21332100 |
| H | -0.76684900 | -0.78217500 | -1.20073000 |
| O | -2.27550500 | -1.04558900 | 0.19349800  |
| H | -2.31293100 | -1.93894500 | -0.18635700 |
| C | 1.97132400  | -0.28967800 | 0.09214600  |
| N | 3.02051900  | -0.65403700 | -0.26679800 |

### Cyclobutene (Starting material)

|   |             |            |             |
|---|-------------|------------|-------------|
| C | -1.26588800 | 1.06441900 | -0.41164800 |
| C | -0.18870700 | 1.49987400 | 0.25539500  |
| C | 0.36717400  | 0.10429300 | 0.53043500  |

|   |             |             |             |
|---|-------------|-------------|-------------|
| H | 0.20106800  | 2.47856200  | 0.51668300  |
| H | 0.23826900  | -0.23103600 | 1.56533600  |
| C | -0.85825600 | -0.38950300 | -0.37538300 |
| H | -2.12906700 | 1.55081500  | -0.85487500 |
| H | -0.51662900 | -0.78634300 | -1.34044000 |
| O | -1.79542400 | -1.24800800 | 0.23127800  |
| H | -1.53848800 | -2.17139200 | 0.07908100  |
| C | 1.71761300  | -0.20980000 | 0.07077400  |
| N | 2.78237400  | -0.46746400 | -0.31906400 |

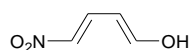

### Butadiene (Product)

|   |             |             |             |
|---|-------------|-------------|-------------|
| C | 1.59481500  | 0.74008900  | -0.11571000 |
| C | 0.14870800  | 0.75488800  | -0.05357300 |
| C | -0.67988000 | -0.30765100 | -0.10627400 |
| H | -0.32562100 | 1.72980800  | 0.03408900  |
| H | -0.40702000 | -1.34420600 | -0.24933500 |
| C | 2.36398000  | -0.34638900 | 0.10357600  |
| H | 2.09612000  | 1.68299100  | -0.31962800 |
| H | 1.95022800  | -1.31539200 | 0.37800600  |
| O | 3.71341400  | -0.27683500 | 0.00568000  |
| H | 4.12140300  | -1.11685400 | 0.26369000  |
| N | -2.10912400 | -0.13994800 | 0.00859400  |
| O | -2.78336600 | -1.17783200 | -0.05296200 |
| O | -2.58467000 | 0.99187500  | 0.15539400  |

### Transition state

|   |             |             |             |
|---|-------------|-------------|-------------|
| C | 1.59675500  | 1.12105400  | -0.08698500 |
| C | 0.27960200  | 1.36400200  | -0.36068900 |
| C | -0.29080900 | 0.05329600  | -0.48830100 |
| H | -0.24771600 | 2.31000000  | -0.44175200 |
| H | -0.04307000 | -0.60571600 | -1.31057400 |
| C | 1.61513300  | -0.22974800 | 0.40342700  |
| H | 2.47832500  | 1.73845700  | -0.23977800 |
| H | 1.12561700  | -0.47180500 | 1.34153000  |

|   |             |             |             |
|---|-------------|-------------|-------------|
| O | 2.61488300  | -1.05961600 | 0.03127800  |
| H | 2.64301900  | -1.85178000 | 0.59363400  |
| N | -1.63604100 | -0.20530200 | -0.01102600 |
| O | -2.15297000 | -1.28981000 | -0.31122700 |
| O | -2.17540900 | 0.65771800  | 0.69612400  |

### Cyclobutene (Starting material)

|   |             |             |             |
|---|-------------|-------------|-------------|
| C | -1.60180600 | 1.10707200  | -0.24640500 |
| C | -0.53205000 | 1.49403700  | 0.46601900  |
| C | 0.03724900  | 0.10581400  | 0.56988200  |
| H | -0.18066800 | 2.44216700  | 0.85653600  |
| H | -0.01004900 | -0.40547100 | 1.53221700  |
| C | -1.13745800 | -0.32248900 | -0.41274900 |
| H | -2.49592500 | 1.60776500  | -0.60417500 |
| H | -0.76037800 | -0.56029800 | -1.41682100 |
| O | -2.03906200 | -1.29812700 | 0.04427800  |
| H | -1.71560300 | -2.18014700 | -0.20025700 |
| N | 1.42250500  | -0.13502700 | 0.03047100  |
| O | 2.00121800  | 0.79315600  | -0.52930400 |
| O | 1.86402800  | -1.27820900 | 0.15486700  |

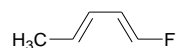

### Butadiene (Product)

|   |             |             |             |
|---|-------------|-------------|-------------|
| C | -0.79839200 | 0.70680400  | 0.09119700  |
| C | 0.65963600  | 0.71537100  | -0.08561500 |
| C | 1.49099100  | -0.30555400 | 0.18492300  |
| H | 1.08428700  | 1.65068600  | -0.45507700 |
| H | 1.07931600  | -1.21903500 | 0.61709600  |
| C | -1.57437100 | -0.34609200 | -0.17065100 |
| H | -1.28134800 | 1.62269300  | 0.42948700  |
| H | -1.26151100 | -1.30153000 | -0.57807200 |
| F | -2.91620700 | -0.30808300 | 0.04827200  |
| C | 2.97491200  | -0.28765000 | -0.04337300 |
| H | 3.31009900  | 0.67540000  | -0.44445300 |
| H | 3.52238200  | -0.48047900 | 0.88940500  |



|   |            |             |             |
|---|------------|-------------|-------------|
| H | 3.27598300 | -1.07226600 | -0.75172300 |
|---|------------|-------------|-------------|

**Transition state**

|   |             |             |             |
|---|-------------|-------------|-------------|
| C | 0.82982900  | 1.13499700  | 0.05492400  |
| C | -0.54486900 | 1.21743800  | -0.05786400 |
| C | -0.99112400 | -0.10309200 | -0.36731700 |
| H | -1.18841400 | 2.06108400  | 0.19362100  |
| H | -0.61430800 | -0.53641500 | -1.28867800 |
| C | 1.01923900  | -0.24109400 | 0.32732800  |
| H | 1.60610400  | 1.88703800  | -0.06724800 |
| H | 0.69879900  | -0.70994600 | 1.24981800  |
| F | 2.13888800  | -0.88685600 | -0.14447800 |
| C | -2.28863200 | -0.69721800 | 0.12397900  |
| H | -3.09723000 | -0.53006400 | -0.60437600 |
| H | -2.19910100 | -1.78360600 | 0.24707100  |
| H | -2.60249000 | -0.27257200 | 1.08378600  |

**Cyclobutene (Starting material)**

|   |             |             |             |
|---|-------------|-------------|-------------|
| C | 0.83483900  | 1.20429200  | 0.29847900  |
| C | -0.35943100 | 1.37184400  | -0.29298600 |
| C | -0.66617400 | -0.11997800 | -0.40928600 |
| H | -0.94131800 | 2.25087100  | -0.56158100 |
| H | -0.54539000 | -0.49892800 | -1.43155300 |
| C | 0.67597900  | -0.29202000 | 0.38417800  |
| H | 1.61513500  | 1.87486200  | 0.64575900  |
| H | 0.56578000  | -0.71565100 | 1.38885500  |
| F | 1.66138800  | -1.06077700 | -0.26054000 |
| C | -1.95093200 | -0.65926100 | 0.21627300  |
| H | -1.95890600 | -1.75605200 | 0.21279400  |
| H | -2.06280200 | -0.31970400 | 1.25369500  |
| H | -2.83068500 | -0.31767000 | -0.34305800 |

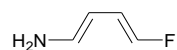**Butadiene (Product)**

|   |             |             |             |
|---|-------------|-------------|-------------|
| C | -0.68615100 | 0.74432700  | 0.08045600  |
| C | 0.76681500  | 0.70959100  | -0.09719200 |
| C | 1.54296100  | -0.33443000 | 0.20471300  |
| H | 1.25690600  | 1.60020800  | -0.49082000 |
| H | 1.23795800  | -1.26467000 | 0.67189400  |
| C | -1.50957500 | -0.29750500 | -0.16649700 |
| H | -1.11660900 | 1.69285200  | 0.40488500  |
| H | -1.11176500 | -1.22106400 | -0.58180500 |
| N | -2.89406900 | -0.29348900 | -0.03371500 |
| H | -3.33923400 | -1.19626700 | 0.06189300  |
| H | -3.28900600 | 0.40203100  | 0.58811900  |
| F | 2.88177000  | -0.32117400 | -0.06078200 |

**Transition state**

|   |             |             |             |
|---|-------------|-------------|-------------|
| C | 0.76033800  | 1.13749000  | 0.06777700  |
| C | -0.60745600 | 1.19961900  | -0.08617400 |
| C | -1.01034900 | -0.14978400 | -0.37309600 |
| H | -1.28579300 | 2.03307100  | 0.09480500  |
| H | -0.69032400 | -0.58803500 | -1.31116900 |
| C | 0.98575100  | -0.23906600 | 0.33062900  |
| H | 1.51269400  | 1.91489900  | -0.05334700 |
| H | 0.70877300  | -0.69904700 | 1.27332300  |
| F | 2.14610300  | -0.83411400 | -0.13902000 |
| N | -2.20554500 | -0.67660000 | 0.10425800  |
| H | -2.45234500 | -1.61276700 | -0.18945500 |
| H | -2.43882100 | -0.49444800 | 1.07239600  |

**Cyclobutene (Starting material)**

|   |             |             |             |
|---|-------------|-------------|-------------|
| C | -0.76046000 | 1.23578000  | -0.27771300 |
| C | 0.45926700  | 1.33645800  | 0.27355200  |
| C | 0.67827800  | -0.16585300 | 0.38665000  |
| H | 1.09848400  | 2.17767200  | 0.53108100  |

|   |             |             |             |
|---|-------------|-------------|-------------|
| H | 0.55273200  | -0.53926800 | 1.41484800  |
| C | -0.68209600 | -0.26379200 | -0.38839600 |
| H | -1.52011100 | 1.95039400  | -0.57972300 |
| H | -0.58549900 | -0.67945200 | -1.39532400 |
| F | -1.69619700 | -0.98810500 | 0.26259000  |
| N | 1.84390000  | -0.70217100 | -0.31083300 |
| H | 1.94413000  | -1.70140400 | -0.13881300 |
| H | 2.69880600  | -0.25535800 | 0.01589200  |

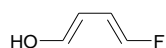

### Butadiene (Product)

|   |             |             |             |
|---|-------------|-------------|-------------|
| C | -0.70362300 | 0.74663100  | 0.09016500  |
| C | 0.74777900  | 0.71505800  | -0.10590700 |
| C | 1.51881800  | -0.32990500 | 0.20302200  |
| H | 1.23272700  | 1.60094200  | -0.51453900 |
| H | 1.20885900  | -1.24977600 | 0.68726100  |
| C | -1.51296900 | -0.28908400 | -0.17862400 |
| H | -1.14978300 | 1.66863000  | 0.45989800  |
| H | -1.14735100 | -1.21263700 | -0.62529200 |
| O | -2.85292300 | -0.24225900 | 0.10497500  |
| H | -3.30838500 | -0.98412000 | -0.31820300 |
| F | 2.85414300  | -0.32679600 | -0.06453900 |

### Transition state

|   |             |             |             |
|---|-------------|-------------|-------------|
| C | 0.73217300  | 1.14078400  | 0.03824100  |
| C | -0.64637000 | 1.17811000  | -0.05925900 |
| C | -1.01451900 | -0.16730100 | -0.33980900 |
| H | -1.33749900 | 1.99093100  | 0.15435100  |
| H | -0.70878800 | -0.62633000 | -1.27401500 |
| C | 0.98964900  | -0.21798600 | 0.33439400  |
| H | 1.46926300  | 1.91992500  | -0.14373800 |
| H | 0.70950300  | -0.67591700 | 1.27578300  |
| F | 2.13924700  | -0.81217000 | -0.14476400 |
| O | -2.16231400 | -0.67907700 | 0.21477200  |
| H | -2.45278100 | -1.46810700 | -0.26908400 |

### Cyclobutene (Starting material)

|   |             |             |             |
|---|-------------|-------------|-------------|
| C | 0.71399300  | 1.25438000  | 0.24949600  |
| C | -0.52567000 | 1.31855200  | -0.26534500 |
| C | -0.69323900 | -0.18214900 | -0.37044100 |
| H | -1.20236600 | 2.13113900  | -0.51263100 |
| H | -0.59900800 | -0.57438500 | -1.39163900 |
| C | 0.68172200  | -0.24431700 | 0.39047700  |
| H | 1.47056500  | 1.99020800  | 0.50266800  |
| H | 0.60411700  | -0.64303800 | 1.40619600  |
| F | 1.70799200  | -0.95658900 | -0.25444200 |
| O | -1.84338300 | -0.69334000 | 0.27751500  |
| H | -1.95900400 | -1.62669400 | 0.04014000  |

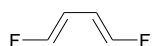

### Butadiene (Product)

|   |             |             |             |
|---|-------------|-------------|-------------|
| C | 0.72594500  | 0.70997900  | -0.10621600 |
| C | -0.72595100 | 0.70996900  | 0.10630900  |
| C | -1.51186700 | -0.32441800 | -0.19715600 |
| H | -1.18787800 | 1.60783100  | 0.51357700  |
| H | -1.21104800 | -1.25202000 | -0.67293200 |
| C | 1.51193300  | -0.32430200 | 0.19746800  |
| H | 1.18782000  | 1.60772100  | -0.51381400 |
| H | 1.21113100  | -1.25182300 | 0.67335000  |
| F | 2.84362600  | -0.29663400 | -0.06000900 |
| F | -2.84366900 | -0.29659600 | 0.05971900  |

### Transition state

|   |             |             |             |
|---|-------------|-------------|-------------|
| C | -0.69224100 | 1.13966000  | -0.03663000 |
| C | 0.69200800  | 1.13966300  | 0.03644200  |
| C | 1.00056600  | -0.20369100 | 0.33965000  |
| H | 1.40489900  | 1.93113200  | -0.18184800 |
| H | 0.72064900  | -0.68332100 | 1.26924100  |
| C | -1.00064100 | -0.20371900 | -0.33966900 |
| H | -1.40520000 | 1.93078100  | 0.18270300  |
| H | -0.72030000 | -0.68339800 | -1.26910500 |
| F | -2.15215100 | -0.76267000 | 0.14710600  |

F 2.15235100 -0.76251600 -0.14707900

### Cyclobutene (Starting material)

C -0.61924700 1.27865100 -0.26208900  
 C 0.61882500 1.27877200 0.26215500  
 C 0.67646500 -0.22412500 0.38655300  
 H 1.33554500 2.05211300 0.51919200  
 H 0.61126900 -0.64245900 1.39466200  
 C -0.67636000 -0.22420500 -0.38646400  
 H -1.33611000 2.05185200 -0.51926400  
 H -0.61060000 -0.64198800 -1.39460000  
 F -1.74333000 -0.85985200 0.26047200  
 F 1.74353000 -0.85949000 -0.26057500

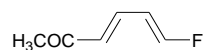

### Butadiene (Product)

C 1.66677200 0.69961900 -0.18475400  
 C 0.20864500 0.71734500 -0.09421400  
 C -0.61151800 -0.35452200 -0.15560000  
 H -0.23014500 1.70761500 0.02014300  
 H -0.21885800 -1.35453800 -0.32942000  
 C 2.42944300 -0.33559800 0.18170900  
 H 2.16752200 1.59974200 -0.53557800  
 H 2.09549600 -1.27311600 0.61362500  
 F 3.77425400 -0.28821700 0.06006300  
 C -2.08466800 -0.30802400 -0.01532700  
 C -2.78866700 1.02604500 0.17984600  
 H -2.57563400 1.71233400 -0.64892700  
 H -3.86497500 0.85013900 0.23206300  
 H -2.45953400 1.51350100 1.10579800  
 O -2.72527500 -1.35386500 -0.05852800

### Transition state

|   |             |             |             |
|---|-------------|-------------|-------------|
| C | 1.67339000  | 1.10881300  | -0.11225000 |
| C | 0.35939200  | 1.32817700  | -0.44617200 |
| C | -0.22900000 | 0.01915300  | -0.55737300 |
| H | -0.16030100 | 2.28117800  | -0.52600700 |
| H | 0.16568500  | -0.66144700 | -1.30582400 |
| C | 1.63493900  | -0.20760600 | 0.42851800  |
| H | 2.56175700  | 1.72213100  | -0.24154500 |
| H | 1.14105300  | -0.45564300 | 1.36015600  |
| F | 2.66845800  | -1.06263100 | 0.21119500  |
| C | -1.60156400 | -0.34641800 | -0.11326400 |
| C | -2.43005100 | 0.69844200  | 0.61644400  |
| H | -3.41852100 | 0.28929000  | 0.83550800  |
| H | -1.94328400 | 0.99537000  | 1.55437500  |
| H | -2.53912100 | 1.60721900  | 0.01016500  |
| O | -2.03325300 | -1.47722400 | -0.31037500 |

#### Cyclobutene (Starting material)

|   |             |             |             |
|---|-------------|-------------|-------------|
| C | 0.63970700  | 1.28023900  | -0.80003400 |
| C | 1.66527300  | 1.09808100  | 0.04629400  |
| C | 1.17347800  | -0.25481500 | 0.49192000  |
| H | 2.51959200  | 1.69504900  | 0.35019500  |
| H | 0.83134300  | -0.33880700 | 1.52897900  |
| C | 0.02986700  | -0.10413600 | -0.59013800 |
| H | 0.32248900  | 2.11498600  | -1.41977900 |
| H | 0.18834200  | -0.80518600 | -1.41479000 |
| C | -1.41042900 | -0.24709100 | -0.10823900 |
| O | -2.08107300 | -1.20571200 | -0.45118700 |
| C | -1.96911200 | 0.82980400  | 0.80311300  |
| H | -1.27364400 | 1.07631200  | 1.61455800  |
| H | -2.12284600 | 1.75414500  | 0.22999600  |
| H | -2.92620200 | 0.50420100  | 1.21603500  |
| F | 2.03742300  | -1.32972100 | 0.27186600  |

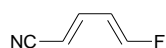

**Butadiene (Product)**

|   |             |             |             |
|---|-------------|-------------|-------------|
| C | -1.16144100 | 0.71735600  | 0.07691500  |
| C | 0.29246500  | 0.73829400  | -0.04331400 |
| C | 1.12020500  | -0.30071800 | 0.20960000  |
| H | 0.73288000  | 1.68539400  | -0.35046800 |
| H | 0.74418500  | -1.24881000 | 0.58742500  |
| C | -1.91195200 | -0.36772800 | -0.14023900 |
| H | -1.66655600 | 1.65144100  | 0.31322600  |
| H | -1.56741300 | -1.34541200 | -0.46132600 |
| F | -3.25309800 | -0.32809000 | 0.00045500  |
| C | 2.53148500  | -0.21688000 | 0.02207700  |
| N | 3.68717300  | -0.17310600 | -0.12045400 |

**Transition state**

|   |             |             |             |
|---|-------------|-------------|-------------|
| C | -1.26011600 | 1.06184300  | -0.15753900 |
| C | 0.06517400  | 1.35536800  | 0.04733600  |
| C | 0.65858200  | 0.11655500  | 0.47944100  |
| H | 0.60047400  | 2.27996000  | -0.15577100 |
| H | 0.31996600  | -0.32004200 | 1.41277000  |
| C | -1.24642500 | -0.34988000 | -0.33719900 |
| H | -2.14090400 | 1.69849300  | -0.16140600 |
| H | -0.78344500 | -0.83665800 | -1.18709800 |
| F | -2.27237000 | -1.10390600 | 0.13350700  |
| C | 1.98087700  | -0.27696600 | 0.09035000  |
| N | 3.03809700  | -0.61830300 | -0.26348300 |

**Cyclobutene (Starting material)**

|   |             |             |             |
|---|-------------|-------------|-------------|
| C | -1.29949400 | 1.03047500  | -0.40724000 |
| C | -0.23048800 | 1.47128500  | 0.27127500  |
| C | 0.34826300  | 0.07642700  | 0.52196800  |
| H | 0.14889500  | 2.45076200  | 0.54454600  |
| H | 0.22203300  | -0.28340300 | 1.54878300  |
| C | -0.84450000 | -0.40610000 | -0.39352500 |
| H | -2.16442800 | 1.50867200  | -0.85441200 |
| H | -0.53980400 | -0.83867900 | -1.35052500 |

|   |             |             |             |
|---|-------------|-------------|-------------|
| F | -1.69884500 | -1.32072400 | 0.22067000  |
| C | 1.70958500  | -0.19743500 | 0.06365900  |
| N | 2.78895800  | -0.39982200 | -0.31589200 |

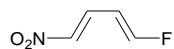

### Butadiene (Product)

|   |             |             |             |
|---|-------------|-------------|-------------|
| C | 1.61452400  | 0.69539400  | -0.18232700 |
| C | 0.16301100  | 0.75134400  | -0.07542700 |
| C | -0.66833000 | -0.30040100 | -0.15289600 |
| H | -0.28771900 | 1.73167600  | 0.06265000  |
| H | -0.40219600 | -1.32935500 | -0.35410800 |
| C | 2.35055400  | -0.36438000 | 0.17228200  |
| H | 2.13206000  | 1.58767400  | -0.52662200 |
| H | 1.99205800  | -1.29357100 | 0.60369400  |
| F | 3.69042800  | -0.35171200 | 0.04692500  |
| N | -2.10132800 | -0.13005700 | 0.01107600  |
| O | -2.77775900 | -1.16115800 | -0.07279100 |
| O | -2.55940500 | 0.99711300  | 0.21588300  |

### Transition state

|   |             |             |             |
|---|-------------|-------------|-------------|
| C | 1.62424800  | 1.07165200  | -0.12613200 |
| C | 0.29490800  | 1.33205500  | -0.36233700 |
| C | -0.28838400 | 0.03610300  | -0.48105100 |
| H | -0.23015700 | 2.28144700  | -0.40075000 |
| H | -0.04628100 | -0.64634500 | -1.28494700 |
| C | 1.61174400  | -0.24679200 | 0.40409100  |
| H | 2.51212100  | 1.66625100  | -0.32324200 |
| H | 1.15119400  | -0.50818400 | 1.34911500  |
| F | 2.61957900  | -1.10074400 | 0.11717400  |
| N | -1.65190800 | -0.19608300 | -0.00526200 |
| O | -2.17529100 | 0.68556500  | 0.68561700  |
| O | -2.18156300 | -1.26956600 | -0.30628300 |

### Cyclobutene (Starting material)



|   |             |             |             |
|---|-------------|-------------|-------------|
| C | 1.67524300  | 1.02764500  | 0.09601900  |
| C | 0.60666100  | 1.36928500  | -0.64069300 |
| C | -0.03051400 | 0.00223800  | -0.56501100 |
| H | 0.27749400  | 2.27889400  | -1.13136600 |
| H | -0.03282800 | -0.61836200 | -1.46059700 |
| C | 1.12521900  | -0.33193000 | 0.44318100  |
| H | 2.59141000  | 1.53031700  | 0.38688800  |
| H | 0.79652600  | -0.47944200 | 1.47578300  |
| F | 1.90070300  | -1.43142200 | 0.08663500  |
| N | -1.42519500 | -0.07290200 | 0.01506900  |
| O | -1.70598600 | 0.72757000  | 0.90546100  |
| O | -2.17179100 | -0.94278600 | -0.42507200 |

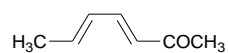

### Butadiene (Product)

|   |             |             |             |
|---|-------------|-------------|-------------|
| C | 0.15394000  | 0.72089200  | -0.06667400 |
| C | 1.61507300  | 0.72194700  | -0.13555100 |
| C | 2.42379500  | -0.32053500 | 0.13545400  |
| H | 2.07292800  | 1.67411400  | -0.40676700 |
| H | 1.98148000  | -1.26381200 | 0.45814300  |
| C | -0.65912400 | -0.35845200 | -0.11368100 |
| H | -0.30160900 | 1.70735600  | 0.01550300  |
| H | -0.25605500 | -1.36097100 | -0.24288200 |
| C | -2.13281600 | -0.31852500 | -0.01097400 |
| O | -2.77097800 | -1.36772100 | -0.04519300 |
| C | -2.85051400 | 1.01574600  | 0.13565500  |
| H | -2.53887400 | 1.53356000  | 1.05105000  |
| H | -2.63098100 | 1.67915100  | -0.70989100 |
| H | -3.92610400 | 0.83222500  | 0.17723500  |
| C | 3.91933300  | -0.29010000 | 0.04644800  |
| H | 4.28865200  | 0.69120600  | -0.27037800 |
| H | 4.37730400  | -0.53595900 | 1.01455400  |
| H | 4.28296700  | -1.04093400 | -0.66909000 |

**Transition state**

|   |             |             |             |
|---|-------------|-------------|-------------|
| C | 1.56292600  | 1.23702400  | -0.06236700 |
| C | 0.25399900  | 1.40517800  | -0.42497700 |
| C | -0.26396000 | 0.06185900  | -0.55220500 |
| H | -0.30235300 | 2.33122300  | -0.56265400 |
| H | 0.17754800  | -0.59100000 | -1.30006200 |
| C | 1.64278900  | -0.11226800 | 0.43476200  |
| H | 2.41157000  | 1.90578900  | -0.20676900 |
| H | 1.05794400  | -0.33860000 | 1.32111200  |
| C | 2.79055900  | -1.04948300 | 0.18215500  |
| H | 3.56540200  | -0.91449700 | 0.95423800  |
| H | 2.46328300  | -2.09360000 | 0.24517600  |
| H | 3.25487000  | -0.88770700 | -0.79603700 |
| C | -1.60573300 | -0.39361100 | -0.11633100 |
| C | -2.50510400 | 0.59748000  | 0.60582100  |
| H | -3.48568300 | 0.14557300  | 0.77041500  |
| H | -2.06824600 | 0.87734000  | 1.57323100  |
| H | -2.61982200 | 1.52346600  | 0.02781300  |
| O | -1.96342100 | -1.55438300 | -0.30345200 |

**Cyclobutene (Starting material)**

|   |             |             |             |
|---|-------------|-------------|-------------|
| C | 0.51565900  | 1.37633600  | -0.77838600 |
| C | 1.49688600  | 1.25562100  | 0.12817000  |
| C | 1.15946800  | -0.18375300 | 0.48648900  |
| H | 2.27335700  | 1.92733800  | 0.48807500  |
| H | 0.75046500  | -0.29611900 | 1.50082200  |
| C | 0.01084400  | -0.05096600 | -0.61521600 |
| H | 0.18704000  | 2.18607900  | -1.42559000 |
| H | 0.18741200  | -0.71030000 | -1.47230800 |
| C | -1.39889000 | -0.31592600 | -0.10986600 |
| O | -1.96957100 | -1.35840200 | -0.39205100 |
| C | -2.06194400 | 0.73571900  | 0.76041100  |
| H | -1.36574000 | 1.15469500  | 1.49573600  |
| H | -2.39362800 | 1.57169100  | 0.12957300  |
| H | -2.93227000 | 0.30585100  | 1.26147800  |
| C | 2.21162700  | -1.26106900 | 0.23479100  |
| H | 1.78182900  | -2.26308500 | 0.35098400  |

|   |            |             |             |
|---|------------|-------------|-------------|
| H | 2.62506400 | -1.17942700 | -0.77769500 |
| H | 3.04114000 | -1.16527100 | 0.94697800  |

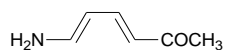

### Butadiene (Product)

|   |             |             |             |
|---|-------------|-------------|-------------|
| C | -0.18256700 | 0.71734800  | -0.03913300 |
| C | -1.62940800 | 0.75413800  | -0.06122800 |
| C | -2.44157700 | -0.32786800 | 0.07205500  |
| H | -2.08980500 | 1.73451700  | -0.18184900 |
| H | -2.02034700 | -1.31674800 | 0.23693300  |
| C | 0.63629700  | -0.36728000 | -0.07189700 |
| H | 0.28663500  | 1.69947800  | 0.00789800  |
| H | 0.23775600  | -1.37673900 | -0.15525000 |
| C | 2.10198700  | -0.31991600 | -0.00811300 |
| O | 2.75510300  | -1.36452300 | -0.02896200 |
| C | 2.82005100  | 1.02261800  | 0.08336400  |
| H | 2.57503400  | 1.66610400  | -0.77060800 |
| H | 2.53840800  | 1.56257900  | 0.99584900  |
| H | 3.89681800  | 0.84078300  | 0.09570600  |
| N | -3.80992800 | -0.32151000 | -0.02796600 |
| H | -4.29392000 | 0.56756200  | -0.03126400 |
| H | -4.33060000 | -1.08502100 | 0.37975200  |

### Transition state

|   |             |             |             |
|---|-------------|-------------|-------------|
| C | -0.46959900 | -1.40221400 | -0.46613700 |
| C | -1.73276500 | -1.08478300 | -0.08754600 |
| C | -1.61785300 | 0.27044900  | 0.44016500  |
| H | -2.66004000 | -1.65427400 | -0.13988500 |
| H | -1.11406000 | 0.40740800  | 1.39090200  |
| C | 0.25236900  | -0.13639100 | -0.51027700 |
| H | -0.04132400 | -2.38739200 | -0.63915200 |
| H | -0.01367400 | 0.55900900  | -1.30426100 |
| C | 1.60451000  | -0.00597500 | 0.04052900  |
| O | 2.09868300  | -0.88276200 | 0.75520600  |
| C | 2.39022900  | 1.25798500  | -0.28684300 |

|   |             |            |             |
|---|-------------|------------|-------------|
| H | 2.89334700  | 1.13285900 | -1.25561700 |
| H | 1.74020600  | 2.13759800 | -0.36724300 |
| H | 3.15542300  | 1.42874100 | 0.47506100  |
| N | -2.54790200 | 1.23693400 | 0.16398100  |
| H | -2.48500300 | 2.13876700 | 0.61728000  |
| H | -2.99036800 | 1.24641400 | -0.74594900 |

**Cyclobutene (Starting material)**

|   |             |             |             |
|---|-------------|-------------|-------------|
| C | 0.55445000  | 1.39892000  | -0.71149800 |
| C | 1.56191300  | 1.20492200  | 0.15070200  |
| C | 1.17038200  | -0.22777800 | 0.46914600  |
| H | 2.37712300  | 1.82708300  | 0.51207900  |
| H | 0.75931000  | -0.34775900 | 1.48690000  |
| C | 0.01792700  | -0.02146200 | -0.61137000 |
| H | 0.22931200  | 2.25307000  | -1.30094500 |
| H | 0.20725700  | -0.64704400 | -1.48943300 |
| C | -1.39239800 | -0.30235200 | -0.11436200 |
| O | -1.91496700 | -1.38412100 | -0.33553200 |
| C | -2.10330200 | 0.77412600  | 0.68208300  |
| H | -1.45876600 | 1.16588200  | 1.47858900  |
| H | -2.34121100 | 1.62333200  | 0.02743000  |
| H | -3.02786800 | 0.37579600  | 1.10576200  |
| N | 2.14239100  | -1.25282900 | 0.10502400  |
| H | 1.75177600  | -2.18362100 | 0.24779300  |
| H | 2.97222400  | -1.18222300 | 0.69270300  |

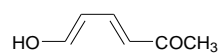**Butadiene (Product)**

|   |             |             |             |
|---|-------------|-------------|-------------|
| C | 0.20019200  | 0.70630900  | -0.06129500 |
| C | 1.65445100  | 0.71397300  | -0.10936100 |
| C | 2.44419000  | -0.35733100 | 0.11515400  |
| H | 2.12950500  | 1.67427400  | -0.31445900 |
| H | 2.05985000  | -1.33637200 | 0.38241300  |
| C | -0.62431800 | -0.36775200 | -0.10392000 |
| H | -0.25132100 | 1.69505700  | 0.00904600  |

|   |             |             |             |
|---|-------------|-------------|-------------|
| H | -0.23492500 | -1.37736200 | -0.21966400 |
| C | -2.09460500 | -0.30862500 | -0.01161100 |
| O | -2.74887300 | -1.34904400 | -0.04320500 |
| C | -2.79745900 | 1.03617400  | 0.12097900  |
| H | -2.49352400 | 1.55281900  | 1.03968200  |
| H | -2.55982800 | 1.69490000  | -0.72337000 |
| H | -3.87557400 | 0.86518500  | 0.14837800  |
| O | 3.79788600  | -0.37624100 | 0.06472300  |
| H | 4.13900700  | 0.49728800  | -0.19384600 |

### Transition state

|   |             |             |             |
|---|-------------|-------------|-------------|
| C | -0.47655800 | -1.38695800 | -0.43647900 |
| C | -1.76430100 | -1.04333900 | -0.14298800 |
| C | -1.64409900 | 0.28212900  | 0.40256800  |
| H | -2.70050400 | -1.57978900 | -0.28133300 |
| H | -1.14900800 | 0.42617400  | 1.35794100  |
| C | 0.25182100  | -0.13765400 | -0.49341600 |
| H | -0.04200600 | -2.37882900 | -0.53632100 |
| H | -0.01784100 | 0.55977500  | -1.28297800 |
| C | 1.61771900  | -0.01173500 | 0.05131600  |
| O | 2.09802300  | -0.88545500 | 0.77329400  |
| C | 2.41054000  | 1.23634600  | -0.30497400 |
| H | 2.75673800  | 1.16936500  | -1.34547900 |
| H | 1.79241900  | 2.13969300  | -0.23006500 |
| H | 3.28089100  | 1.32609000  | 0.34940700  |
| O | -2.56790000 | 1.22680100  | 0.07851700  |
| H | -2.53240600 | 1.97401600  | 0.69816700  |

### Cyclobutene (Starting material)

|   |            |             |             |
|---|------------|-------------|-------------|
| C | 0.58641700 | 1.41087900  | -0.65475500 |
| C | 1.61419000 | 1.15925900  | 0.16968800  |
| C | 1.18447600 | -0.25923600 | 0.46008300  |
| H | 2.45677600 | 1.73902600  | 0.53540300  |
| H | 0.79145800 | -0.41247900 | 1.47652300  |
| C | 0.01964400 | -0.00102900 | -0.61147700 |
| H | 0.25732200 | 2.30332800  | -1.18111400 |
| H | 0.20891400 | -0.59859800 | -1.50881200 |

|   |             |             |             |
|---|-------------|-------------|-------------|
| C | -1.39048600 | -0.28954000 | -0.12568700 |
| O | -1.88452800 | -1.39176700 | -0.31176900 |
| C | -2.12938800 | 0.79655600  | 0.63043200  |
| H | -1.51444900 | 1.18915600  | 1.45035000  |
| H | -2.33624100 | 1.64362500  | -0.03729700 |
| H | -3.07081100 | 0.40529800  | 1.02213700  |
| O | 2.14774800  | -1.23990900 | 0.14572400  |
| H | 1.79215300  | -2.11727800 | 0.36147100  |

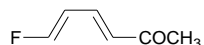

### Butadiene (Product)

|   |             |             |             |
|---|-------------|-------------|-------------|
| C | 0.20860700  | 0.71728800  | -0.09452500 |
| C | 1.66673600  | 0.69953000  | -0.18505000 |
| C | 2.42939000  | -0.33551100 | 0.18193900  |
| H | 2.16749500  | 1.59948800  | -0.53629900 |
| H | 2.09538200  | -1.27278900 | 0.61432900  |
| C | -0.61151600 | -0.35460300 | -0.15581000 |
| H | -0.23020100 | 1.70755600  | 0.01983000  |
| H | -0.21883300 | -1.35462000 | -0.32956900 |
| C | -2.08467100 | -0.30803900 | -0.01533100 |
| O | -2.72539500 | -1.35379200 | -0.05863100 |
| C | -2.78841000 | 1.02611400  | 0.18018900  |
| H | -2.45906200 | 1.51337900  | 1.10616800  |
| H | -2.57537200 | 1.71248400  | -0.64852200 |
| H | -3.86475000 | 0.85042900  | 0.23253600  |
| F | 3.77418700  | -0.28825200 | 0.06023400  |

### Transition state

|   |             |             |             |
|---|-------------|-------------|-------------|
| C | 1.67339000  | 1.10881300  | -0.11225000 |
| C | 0.35939200  | 1.32817700  | -0.44617200 |
| C | -0.22900000 | 0.01915300  | -0.55737300 |
| H | -0.16030100 | 2.28117800  | -0.52600700 |
| H | 0.16568500  | -0.66144700 | -1.30582400 |
| C | 1.63493900  | -0.20760600 | 0.42851800  |
| H | 2.56175700  | 1.72213100  | -0.24154500 |

|   |             |             |             |
|---|-------------|-------------|-------------|
| H | 1.14105300  | -0.45564300 | 1.36015600  |
| F | 2.66845800  | -1.06263100 | 0.21119500  |
| C | -1.60156400 | -0.34641800 | -0.11326400 |
| C | -2.43005100 | 0.69844200  | 0.61644400  |
| H | -3.41852100 | 0.28929000  | 0.83550800  |
| H | -1.94328400 | 0.99537000  | 1.55437500  |
| H | -2.53912100 | 1.60721900  | 0.01016500  |
| O | -2.03325300 | -1.47722400 | -0.31037500 |

### Cyclobutene (Starting material)

|   |             |             |             |
|---|-------------|-------------|-------------|
| C | 0.63970700  | 1.28023900  | -0.80003400 |
| C | 1.66527300  | 1.09808100  | 0.04629400  |
| C | 1.17347800  | -0.25481500 | 0.49192000  |
| H | 2.51959200  | 1.69504900  | 0.35019500  |
| H | 0.83134300  | -0.33880700 | 1.52897900  |
| C | 0.02986700  | -0.10413600 | -0.59013800 |
| H | 0.32248900  | 2.11498600  | -1.41977900 |
| H | 0.18834200  | -0.80518600 | -1.41479000 |
| C | -1.41042900 | -0.24709100 | -0.10823900 |
| O | -2.08107300 | -1.20571200 | -0.45118700 |
| C | -1.96911200 | 0.82980400  | 0.80311300  |
| H | -1.27364400 | 1.07631200  | 1.61455800  |
| H | -2.12284600 | 1.75414500  | 0.22999600  |
| H | -2.92620200 | 0.50420100  | 1.21603500  |
| F | 2.03742300  | -1.32972100 | 0.27186600  |

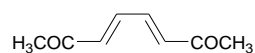

### Butadiene (Product)

|   |             |             |             |
|---|-------------|-------------|-------------|
| C | 0.73037100  | -0.73815200 | 0.02929300  |
| C | -0.73037600 | -0.73817600 | -0.02941900 |
| C | -1.53352100 | 0.33644500  | 0.12906100  |
| H | -1.18624300 | -1.71315900 | -0.19536200 |
| H | -1.12241700 | 1.32094600  | 0.34233900  |
| C | 1.53349800  | 0.33653600  | -0.12884700 |
| H | 1.18625700  | -1.71318000 | 0.19492000  |

|   |             |             |             |
|---|-------------|-------------|-------------|
| H | 1.12235400  | 1.32107400  | -0.34184100 |
| C | 3.01545400  | 0.31220400  | -0.05052200 |
| O | 3.63595200  | 1.35908000  | -0.19935300 |
| C | 3.74254900  | -0.99605300 | 0.21269200  |
| H | 3.44278300  | -1.42714300 | 1.17578500  |
| H | 3.51844400  | -1.73635900 | -0.56513800 |
| H | 4.81721000  | -0.80406000 | 0.22550800  |
| C | -3.01545400 | 0.31219700  | 0.05056100  |
| C | -3.74255800 | -0.99604300 | -0.21265500 |
| H | -3.51903400 | -1.73605900 | 0.56565000  |
| H | -4.81719800 | -0.80393900 | -0.22611700 |
| H | -3.44229900 | -1.42755200 | -1.17537700 |
| O | -3.63590600 | 1.35913000  | 0.19918300  |

### Transition state

|   |             |             |             |
|---|-------------|-------------|-------------|
| C | -0.66548000 | -1.74111300 | 0.14825500  |
| C | 0.66540900  | -1.74110700 | -0.14824600 |
| C | 0.97905500  | -0.36214400 | -0.45211300 |
| H | 1.38423100  | -2.55598300 | -0.13212400 |
| H | 0.49735200  | 0.08625100  | -1.31722900 |
| C | -0.97910700 | -0.36217500 | 0.45221300  |
| H | -1.38432000 | -2.55597100 | 0.13199500  |
| H | -0.49748000 | 0.08613100  | 1.31741000  |
| C | -2.25341900 | 0.27493000  | 0.01438500  |
| O | -3.01211400 | -0.31798200 | -0.74485400 |
| C | -2.56781700 | 1.66113500  | 0.54307500  |
| H | -2.75500900 | 1.61663700  | 1.62450300  |
| H | -1.71843700 | 2.33984000  | 0.39413500  |
| H | -3.45228000 | 2.06088700  | 0.04249400  |
| C | 2.25339500  | 0.27493500  | -0.01438500 |
| C | 2.56789800  | 1.66112900  | -0.54303300 |
| H | 3.45158400  | 2.06135400  | -0.04145600 |
| H | 2.75659900  | 1.61629700  | -1.62419000 |
| H | 1.71807900  | 2.33957900  | -0.39549300 |
| O | 3.01212500  | -0.31808800 | 0.74473500  |



**Cyclobutene (Starting material)**

|   |             |             |             |
|---|-------------|-------------|-------------|
| C | -0.57924700 | 1.78166600  | -0.55950800 |
| C | 0.40812000  | 1.88656500  | 0.34076500  |
| C | 0.58385600  | 0.39115000  | 0.50599400  |
| H | 0.93391700  | 2.72196900  | 0.79183600  |
| H | 0.25774600  | -0.01450800 | 1.47480900  |
| C | -0.55767500 | 0.26206400  | -0.61528600 |
| H | -1.17430100 | 2.50718500  | -1.10784900 |
| H | -0.16972800 | -0.15889700 | -1.55003200 |
| C | -1.75668400 | -0.57377600 | -0.18733700 |
| O | -1.82572700 | -1.74751300 | -0.51714500 |
| C | -2.82255700 | 0.08009400  | 0.66777400  |
| H | -2.37974900 | 0.64841600  | 1.49446500  |
| H | -3.38788300 | 0.80069600  | 0.06152200  |
| H | -3.50712700 | -0.67866100 | 1.05293400  |
| C | 1.91330200  | -0.24213800 | 0.11695100  |
| C | 2.01544700  | -1.74544700 | 0.28418300  |
| H | 1.11977800  | -2.25074500 | -0.09652200 |
| H | 2.90718200  | -2.11840700 | -0.22479500 |
| H | 2.09069700  | -1.98756600 | 1.35341000  |
| O | 2.83598900  | 0.43369400  | -0.30422900 |

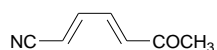**Butadiene (Product)**

|   |             |             |             |
|---|-------------|-------------|-------------|
| C | -0.18812900 | 0.74540100  | -0.05157200 |
| C | 1.27017400  | 0.74890000  | -0.11968600 |
| C | 2.07300500  | -0.30427400 | 0.15558200  |
| H | 1.73668400  | 1.69280600  | -0.39520400 |
| H | 1.66912300  | -1.25870500 | 0.48530200  |
| C | -0.98287900 | -0.34511100 | -0.10649500 |
| H | -0.64713700 | 1.72931300  | 0.02704800  |
| H | -0.56652700 | -1.34207800 | -0.23692800 |
| C | -2.46562200 | -0.32862100 | -0.01540300 |
| O | -3.07134600 | -1.39341200 | -0.04999500 |
| C | -3.20455500 | 0.99123600  | 0.11985500  |

|   |             |             |             |
|---|-------------|-------------|-------------|
| H | -2.90241800 | 1.52086700  | 1.03173900  |
| H | -2.99395900 | 1.65078500  | -0.73099200 |
| H | -4.27695200 | 0.79113900  | 0.16129300  |
| C | 3.49274600  | -0.22772200 | 0.05293900  |
| N | 4.65478800  | -0.18795400 | -0.02194500 |

**Transition state**

|   |             |             |             |
|---|-------------|-------------|-------------|
| C | 1.11268600  | 1.52988600  | -0.05451300 |
| C | -0.19377200 | 1.50127300  | -0.44571800 |
| C | -0.51897200 | 0.09553700  | -0.55691200 |
| H | -0.87588100 | 2.33365300  | -0.60497100 |
| H | 0.00879800  | -0.50198200 | -1.29434400 |
| C | 1.35782600  | 0.20016100  | 0.46648900  |
| H | 1.85588100  | 2.31850600  | -0.14461700 |
| H | 0.82824900  | -0.11801700 | 1.35797700  |
| C | 2.58142600  | -0.50340800 | 0.23027400  |
| N | 3.56736200  | -1.08290900 | 0.00264900  |
| C | -1.79721400 | -0.53490700 | -0.10950100 |
| C | -2.83215500 | 0.33631600  | 0.57765700  |
| H | -3.71722100 | -0.26157700 | 0.80416700  |
| H | -2.42842800 | 0.75799900  | 1.50702400  |
| H | -3.11842100 | 1.18285700  | -0.06016400 |
| O | -1.97293300 | -1.73502800 | -0.27878400 |

**Cyclobutene (Starting material)**

|   |             |             |             |
|---|-------------|-------------|-------------|
| C | 0.95406700  | 1.65215800  | 0.09279200  |
| C | -0.03162700 | 1.52801500  | -0.80503000 |
| C | -0.20968300 | 0.02862600  | -0.61762200 |
| H | -0.53626400 | 2.23062800  | -1.46192800 |
| H | 0.11116700  | -0.59048200 | -1.46055000 |
| C | 0.93328000  | 0.17896500  | 0.49295300  |
| H | 1.57694700  | 2.47018900  | 0.44066900  |
| H | 0.57911400  | -0.01492200 | 1.51303000  |
| C | 2.15121000  | -0.59398600 | 0.26229100  |
| N | 3.13179300  | -1.18984800 | 0.07841100  |
| C | -1.53796200 | -0.52763600 | -0.10261400 |
| C | -2.37604300 | 0.34363000  | 0.81269300  |

|   |             |             |             |
|---|-------------|-------------|-------------|
| H | -3.15173700 | -0.26139000 | 1.28680300  |
| H | -1.76906800 | 0.84598300  | 1.57483200  |
| H | -2.85557300 | 1.13509100  | 0.22105000  |
| O | -1.89707400 | -1.64310000 | -0.43444600 |

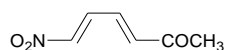

### Butadiene (Product)

|   |             |             |             |
|---|-------------|-------------|-------------|
| C | 0.68623900  | -0.76135500 | 0.02217100  |
| C | -0.77116900 | -0.78335600 | -0.06205400 |
| C | -1.57287900 | 0.27160700  | 0.14772400  |
| H | -1.24800200 | -1.73465800 | -0.28751100 |
| H | -1.27481100 | 1.27174200  | 0.43248900  |
| C | 1.46778900  | 0.32633100  | -0.14615900 |
| H | 1.15131800  | -1.72772900 | 0.20743500  |
| H | 1.03973600  | 1.29736800  | -0.38715600 |
| C | 2.95271300  | 0.33696000  | -0.04838900 |
| O | 3.54239000  | 1.39979100  | -0.19783500 |
| C | 3.70507300  | -0.95024200 | 0.23513800  |
| H | 3.40492100  | -1.37712200 | 1.20005200  |
| H | 3.50436400  | -1.70334500 | -0.53676000 |
| H | 4.77505600  | -0.73496700 | 0.25669100  |
| N | -3.01824100 | 0.14605900  | 0.02218600  |
| O | -3.66432800 | 1.17786900  | 0.22916400  |
| O | -3.50699800 | -0.94683100 | -0.27272100 |

### Transition state

|   |             |             |             |
|---|-------------|-------------|-------------|
| C | 0.52734100  | 1.68842700  | 0.20817400  |
| C | -0.81080900 | 1.61986500  | -0.07563300 |
| C | -0.99204500 | 0.24998300  | -0.44835800 |
| H | -1.58284500 | 2.38234900  | -0.04576600 |
| H | -0.55171000 | -0.18477200 | -1.33604000 |
| C | 0.92984200  | 0.33136100  | 0.47053100  |
| H | 1.19915200  | 2.54093400  | 0.16783200  |
| H | 0.46892800  | -0.18630900 | 1.30719300  |

|   |             |             |             |
|---|-------------|-------------|-------------|
| C | 2.25351100  | -0.20267900 | 0.01540700  |
| O | 2.98221600  | 0.49557100  | -0.67743100 |
| C | 2.62907800  | -1.60385400 | 0.44343200  |
| H | 2.75342100  | -1.64434500 | 1.53398800  |
| H | 1.83171000  | -2.31329600 | 0.18734000  |
| H | 3.56162700  | -1.90516300 | -0.03785200 |
| N | -2.22738000 | -0.46194300 | -0.10081800 |
| O | -2.35703400 | -1.60748600 | -0.54296000 |
| O | -3.03894900 | 0.11761400  | 0.62635500  |

**Cyclobutene (Starting material)**

|   |             |             |             |
|---|-------------|-------------|-------------|
| C | -0.40706300 | 1.72531400  | -0.55067100 |
| C | 0.59838400  | 1.75971800  | 0.33509000  |
| C | 0.61418100  | 0.26706200  | 0.52957800  |
| H | 1.19451700  | 2.54547800  | 0.78641800  |
| H | 0.33733400  | -0.13791500 | 1.50388300  |
| C | -0.50710500 | 0.20394900  | -0.59222300 |
| H | -0.96844200 | 2.49067400  | -1.07879400 |
| H | -0.14191300 | -0.25398100 | -1.51694600 |
| C | -1.81941800 | -0.48463900 | -0.20925200 |
| O | -2.18295300 | -1.47373100 | -0.81862300 |
| C | -2.64742300 | 0.11612700  | 0.90980700  |
| H | -2.03152100 | 0.44928400  | 1.75254000  |
| H | -3.17389000 | 1.00333900  | 0.53233400  |
| H | -3.38771600 | -0.61145300 | 1.24908400  |
| N | 1.88093100  | -0.46584700 | 0.13876900  |
| O | 2.04808600  | -1.57689100 | 0.63585400  |
| O | 2.63684000  | 0.08191100  | -0.65896500 |

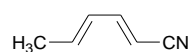**Butadiene (Product)**

|   |             |             |             |
|---|-------------|-------------|-------------|
| C | -0.35945400 | 0.73852100  | 0.03350600  |
| C | 1.09839100  | 0.72955500  | -0.05808900 |
| C | 1.89548800  | -0.34249800 | 0.11228000  |
| H | 1.56197500  | 1.69760900  | -0.24992600 |

|   |             |             |             |
|---|-------------|-------------|-------------|
| H | 1.44450000  | -1.30271800 | 0.36718300  |
| C | -1.17805800 | -0.32176200 | -0.15833800 |
| H | -0.81862000 | 1.69940900  | 0.26157000  |
| H | -0.78886100 | -1.29616000 | -0.44454900 |
| C | -2.59342700 | -0.23132700 | -0.01633400 |
| N | -3.75326800 | -0.18307000 | 0.09094700  |
| C | 3.38978900  | -0.32506300 | 0.00377800  |
| H | 3.85657700  | -0.65436100 | 0.94219600  |
| H | 3.73221200  | -1.02031300 | -0.77541000 |
| H | 3.76872300  | 0.67346900  | -0.23850500 |

### Transition state

|   |             |             |             |
|---|-------------|-------------|-------------|
| C | 0.17964800  | 1.40256900  | 0.07065700  |
| C | -1.14498900 | 1.16984100  | -0.17927000 |
| C | -1.25498700 | -0.25270800 | -0.37111300 |
| H | -1.98151000 | 1.86732100  | -0.14904200 |
| H | -0.70932800 | -0.66891400 | -1.21224400 |
| C | 0.69916900  | 0.11311000  | 0.46699400  |
| H | 0.75904500  | 2.31736400  | -0.03434600 |
| H | 0.32198500  | -0.33446700 | 1.38050800  |
| C | 2.00101200  | -0.34769200 | 0.08797500  |
| N | 3.04205000  | -0.74417600 | -0.25929500 |
| C | -2.40445000 | -1.08982000 | 0.11690600  |
| H | -3.22341300 | -1.06600700 | -0.62029500 |
| H | -2.11024400 | -2.14003100 | 0.22376300  |
| H | -2.80329500 | -0.73783500 | 1.07383600  |

### Cyclobutene (Starting material)

|   |             |             |             |
|---|-------------|-------------|-------------|
| C | -0.08109600 | 1.51269300  | 0.31201800  |
| C | -1.13051200 | 1.17138500  | -0.44716300 |
| C | -0.84220600 | -0.32266300 | -0.41810700 |
| H | -1.92404600 | 1.74211500  | -0.92264500 |
| H | -0.48845100 | -0.71187600 | -1.38093600 |
| C | 0.37723100  | 0.07096200  | 0.52799900  |
| H | 0.33298800  | 2.44886200  | 0.67361800  |
| H | 0.24494900  | -0.29517400 | 1.55377600  |
| C | 1.71498100  | -0.29060500 | 0.06340600  |

|   |             |             |             |
|---|-------------|-------------|-------------|
| N | 2.77690700  | -0.57326900 | -0.31616500 |
| C | -1.89086700 | -1.25593600 | 0.17939700  |
| H | -2.76689300 | -1.32005100 | -0.47750600 |
| H | -1.49095700 | -2.26945000 | 0.30324700  |
| H | -2.23112300 | -0.89656100 | 1.15829600  |

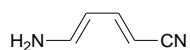

### Butadiene (Product)

|   |             |             |             |
|---|-------------|-------------|-------------|
| C | 0.32540500  | 0.73329900  | 0.02126500  |
| C | -1.11935700 | 0.75423300  | -0.02213500 |
| C | -1.91834400 | -0.34059100 | 0.08079300  |
| H | -1.58684200 | 1.73312900  | -0.12157300 |
| H | -1.48644900 | -1.32409100 | 0.25316200  |
| C | 1.14983400  | -0.33728400 | -0.13541200 |
| H | 0.79914500  | 1.69837600  | 0.19565200  |
| H | 0.76772500  | -1.32754200 | -0.37232100 |
| C | 2.56255000  | -0.23069600 | -0.01383600 |
| N | 3.72441800  | -0.16828600 | 0.07867900  |
| N | -3.28329300 | -0.35495300 | -0.05245200 |
| H | -3.77849200 | 0.52767900  | -0.07861200 |
| H | -3.80348400 | -1.11865400 | 0.35604100  |

### Transition state

|   |             |             |             |
|---|-------------|-------------|-------------|
| C | 0.09710700  | 1.39352200  | 0.09298800  |
| C | -1.19711600 | 1.12859200  | -0.22501900 |
| C | -1.23996700 | -0.31896800 | -0.38318800 |
| H | -2.05437000 | 1.79354000  | -0.31840900 |
| H | -0.75116000 | -0.75326900 | -1.24818000 |
| C | 0.65548800  | 0.10557400  | 0.48521900  |
| H | 0.63688600  | 2.33595200  | 0.01932400  |
| H | 0.32181500  | -0.31762400 | 1.42862100  |
| C | 1.96650100  | -0.30614300 | 0.09684300  |
| N | 3.01526300  | -0.67167800 | -0.26613200 |
| N | -2.27497600 | -1.07244500 | 0.10198600  |
| H | -2.31322300 | -2.06132300 | -0.10648700 |

|   |             |             |            |
|---|-------------|-------------|------------|
| H | -2.71403600 | -0.80388300 | 0.97310100 |
|---|-------------|-------------|------------|

**Cyclobutene (Starting material)**

|   |             |             |             |
|---|-------------|-------------|-------------|
| C | -1.19532600 | 1.11119900  | -0.42578300 |
| C | -0.13199700 | 1.50037600  | 0.28798900  |
| C | 0.37583300  | 0.08142200  | 0.53123200  |
| H | 0.26922800  | 2.46049800  | 0.59779000  |
| H | 0.23785000  | -0.27671100 | 1.55719600  |
| C | -0.84736000 | -0.36600700 | -0.39085200 |
| H | -2.02311900 | 1.64237000  | -0.88815400 |
| H | -0.48858700 | -0.74885900 | -1.35854000 |
| N | -1.81030900 | -1.23323600 | 0.27101900  |
| H | -2.75027300 | -1.07682800 | -0.08638600 |
| H | -1.58779400 | -2.21683900 | 0.12957900  |
| C | 1.71978900  | -0.25046700 | 0.06420000  |
| N | 2.78417400  | -0.51573200 | -0.32133300 |

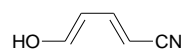**Butadiene (Product)**

|   |             |             |             |
|---|-------------|-------------|-------------|
| C | -1.13957700 | 0.75048200  | 0.05428100  |
| C | 0.30990300  | 0.74326400  | -0.03133500 |
| C | 1.13120400  | -0.31396100 | 0.18548400  |
| H | 0.77229400  | 1.69570500  | -0.28614200 |
| H | 0.74834600  | -1.27748500 | 0.51401300  |
| C | -1.91851800 | -0.33616900 | -0.10728400 |
| H | -1.62928300 | 1.70759600  | 0.21991200  |
| H | -1.51420900 | -1.31533400 | -0.35919200 |
| O | -3.26967200 | -0.25978700 | 0.02567800  |
| H | -3.68547200 | -1.09569700 | -0.23207000 |
| C | 2.54299700  | -0.23034400 | 0.01752600  |
| N | 3.70137800  | -0.18801700 | -0.11056800 |

**Transition state**

|   |             |             |             |
|---|-------------|-------------|-------------|
| C | -0.66649362 | 0.75560403  | 0.05495068  |
| C | 0.70104338  | 0.75560403  | -0.11422632 |
| C | 1.08283638  | -0.60708297 | 0.08943068  |

|   |             |             |             |
|---|-------------|-------------|-------------|
| H | 1.35850738  | 1.56486603  | -0.42988332 |
| H | 0.89532738  | -1.06407397 | 1.05438868  |
| C | -1.04828562 | -0.60708297 | -0.14870332 |
| H | -1.32395662 | 1.56486303  | 0.37061968  |
| H | -0.87189425 | -1.07657139 | -1.09388410 |
| C | -1.71339275 | -1.39914679 | 0.99229073  |
| N | -2.20859146 | -1.98887290 | 1.84181584  |
| O | 2.14266603  | -1.22858995 | -0.64227294 |
| H | 2.98746820  | -0.93340289 | -0.29474757 |

### Cyclobutene (Starting material)

|   |             |             |             |
|---|-------------|-------------|-------------|
| C | -0.18867000 | 1.49989000  | 0.25542500  |
| C | -1.26579500 | 1.06442800  | -0.41171100 |
| C | -0.85820900 | -0.38949100 | -0.37536000 |
| H | -2.12890900 | 1.55087300  | -0.85501500 |
| H | -0.51648800 | -0.78627900 | -1.34037500 |
| C | 0.36715400  | 0.10426800  | 0.53055100  |
| H | 0.20113100  | 2.47859600  | 0.51660300  |
| H | 0.23823300  | -0.23102800 | 1.56546300  |
| C | 1.71756500  | -0.20986400 | 0.07083800  |
| N | 2.78227900  | -0.46748300 | -0.31914900 |
| O | -1.79545800 | -1.24797600 | 0.23123500  |
| H | -1.53852500 | -2.17135700 | 0.07902600  |

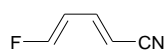

### Butadiene (Product)

|   |             |             |             |
|---|-------------|-------------|-------------|
| C | 0.29244100  | 0.73839500  | -0.04334800 |
| C | -1.16145500 | 0.71729300  | 0.07700500  |
| C | -1.91191600 | -0.36784500 | -0.14009000 |
| H | -1.66667400 | 1.65133400  | 0.31329000  |
| H | -1.56739900 | -1.34547700 | -0.46136400 |
| C | 1.12022100  | -0.30049600 | 0.20977100  |
| H | 0.73278600  | 1.68542700  | -0.35080900 |
| H | 0.74435900  | -1.24857500 | 0.58778100  |
| C | 2.53150400  | -0.21673700 | 0.02208000  |
| N | 3.68718400  | -0.17333600 | -0.12058600 |



|   |             |             |            |
|---|-------------|-------------|------------|
| F | -3.25312600 | -0.32811300 | 0.00029900 |
|---|-------------|-------------|------------|

**Transition state**

|   |             |             |             |
|---|-------------|-------------|-------------|
| C | 0.06506500  | 1.35558800  | 0.04709200  |
| C | -1.26020900 | 1.06170200  | -0.15788500 |
| C | -1.24630500 | -0.35003400 | -0.33689800 |
| H | -2.14129200 | 1.69795200  | -0.16071400 |
| H | -0.78291900 | -0.83712300 | -1.18640700 |
| C | 0.65873800  | 0.11718300  | 0.47970800  |
| H | 0.60011700  | 2.28028800  | -0.15617300 |
| H | 0.32035000  | -0.31928200 | 1.41315900  |
| C | 1.98090600  | -0.27677100 | 0.09004400  |
| N | 3.03806900  | -0.61874700 | -0.26333500 |
| F | -2.27243500 | -1.10406800 | 0.13345700  |

**Cyclobutene (Starting material)**

|   |             |             |             |
|---|-------------|-------------|-------------|
| C | -0.23065500 | 1.47139400  | 0.27113400  |
| C | -1.29965500 | 1.03040800  | -0.40728500 |
| C | -0.84439000 | -0.40614600 | -0.39333700 |
| H | -2.16464000 | 1.50843400  | -0.85454100 |
| H | -0.53954700 | -0.83883800 | -1.35037300 |
| C | 0.34829100  | 0.07665900  | 0.52214000  |
| H | 0.14858100  | 2.45100100  | 0.54412900  |
| H | 0.22184200  | -0.28290100 | 1.54893600  |
| C | 1.70954900  | -0.19708800 | 0.06379900  |
| N | 2.78874100  | -0.39995200 | -0.31604800 |
| F | -1.69847300 | -1.32104400 | 0.22060900  |

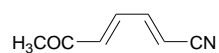**Butadiene (Product)**

|   |             |             |             |
|---|-------------|-------------|-------------|
| C | 1.27017200  | 0.74889300  | -0.11955400 |
| C | -0.18815500 | 0.74543900  | -0.05128500 |
| C | -0.98288400 | -0.34506600 | -0.10651900 |
| H | -0.64709700 | 1.72935700  | 0.02761800  |
| H | -0.56650400 | -1.34195200 | -0.23744900 |

|   |             |             |             |
|---|-------------|-------------|-------------|
| C | 2.07297700  | -0.30427000 | 0.15578600  |
| H | 1.73668900  | 1.69274000  | -0.39526300 |
| H | 1.66914500  | -1.25865600 | 0.48567700  |
| C | 3.49271900  | -0.22773900 | 0.05285600  |
| N | 4.65475200  | -0.18798100 | -0.02218700 |
| C | -2.46566600 | -0.32864800 | -0.01539600 |
| C | -3.20449300 | 0.99124000  | 0.11963300  |
| H | -2.99473700 | 1.65004100  | -0.73201500 |
| H | -4.27684900 | 0.79122600  | 0.16232900  |
| H | -2.90133400 | 1.52173700  | 1.03069500  |
| O | -3.07132500 | -1.39346400 | -0.04992500 |

**Transition state**

|   |             |             |             |
|---|-------------|-------------|-------------|
| C | 1.11268600  | 1.52988600  | -0.05451300 |
| C | -0.19377200 | 1.50127300  | -0.44571800 |
| C | -0.51897200 | 0.09553700  | -0.55691200 |
| H | -0.87588100 | 2.33365300  | -0.60497100 |
| H | 0.00879800  | -0.50198200 | -1.29434400 |
| C | 1.35782600  | 0.20016100  | 0.46648900  |
| H | 1.85588100  | 2.31850600  | -0.14461700 |
| H | 0.82824900  | -0.11801700 | 1.35797700  |
| C | 2.58142600  | -0.50340800 | 0.23027400  |
| N | 3.56736200  | -1.08290900 | 0.00264900  |
| C | -1.79721400 | -0.53490700 | -0.10950100 |
| C | -2.83215500 | 0.33631600  | 0.57765700  |
| H | -3.71722100 | -0.26157700 | 0.80416700  |
| H | -2.42842800 | 0.75799900  | 1.50702400  |
| H | -3.11842100 | 1.18285700  | -0.06016400 |
| O | -1.97293300 | -1.73502800 | -0.27878400 |

**Cyclobutene (Starting material)**

|   |             |             |             |
|---|-------------|-------------|-------------|
| C | 0.95406700  | 1.65215800  | 0.09279200  |
| C | -0.03162700 | 1.52801500  | -0.80503000 |
| C | -0.20968300 | 0.02862600  | -0.61762200 |
| H | -0.53626400 | 2.23062800  | -1.46192800 |
| H | 0.11116700  | -0.59048200 | -1.46055000 |
| C | 0.93328000  | 0.17896500  | 0.49295300  |

|   |             |             |             |
|---|-------------|-------------|-------------|
| H | 1.57694700  | 2.47018900  | 0.44066900  |
| H | 0.57911400  | -0.01492200 | 1.51303000  |
| C | 2.15121000  | -0.59398600 | 0.26229100  |
| N | 3.13179300  | -1.18984800 | 0.07841100  |
| C | -1.53796200 | -0.52763600 | -0.10261400 |
| C | -2.37604300 | 0.34363000  | 0.81269300  |
| H | -3.15173700 | -0.26139000 | 1.28680300  |
| H | -1.76906800 | 0.84598300  | 1.57483200  |
| H | -2.85557300 | 1.13509100  | 0.22105000  |
| O | -1.89707400 | -1.64310000 | -0.43444600 |

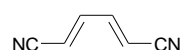

### Butadiene (Product)

|   |             |             |             |
|---|-------------|-------------|-------------|
| C | 0.72762800  | 0.75790600  | -0.04307800 |
| C | -0.72765200 | 0.75788600  | 0.04309100  |
| C | -1.52339700 | -0.31920500 | -0.14535800 |
| H | -1.19529200 | 1.71806600  | 0.25104400  |
| H | -1.11487700 | -1.28980100 | -0.41797100 |
| C | 1.52340400  | -0.31915300 | 0.14539600  |
| H | 1.19523500  | 1.71809500  | -0.25108400 |
| H | 1.11489300  | -1.28976400 | 0.41799900  |
| C | 2.94251800  | -0.25146800 | 0.02747500  |
| N | 4.10356800  | -0.22169200 | -0.06239300 |
| C | -2.94250800 | -0.25145900 | -0.02749800 |
| N | -4.10355700 | -0.22168500 | 0.06237000  |

### Transition state

|   |             |             |             |
|---|-------------|-------------|-------------|
| C | 0.66005600  | 1.45039200  | 0.17020300  |
| C | -0.66011800 | 1.45029800  | -0.17033100 |
| C | -0.95557800 | 0.06654900  | -0.48228000 |
| H | -1.37943900 | 2.26519100  | -0.17393000 |
| H | -0.46515000 | -0.38921500 | -1.33596900 |
| C | 0.95563200  | 0.06672200  | 0.48242000  |
| H | 1.37928400  | 2.26536500  | 0.17380300  |
| H | 0.46525800  | -0.38891700 | 1.33620400  |
| C | 2.18222800  | -0.56323000 | 0.09999500  |

|   |             |             |             |
|---|-------------|-------------|-------------|
| N | 3.16296700  | -1.08554700 | -0.25342200 |
| C | -2.18218200 | -0.56325000 | -0.09995800 |
| N | -3.16299200 | -1.08549600 | 0.25336600  |

### Cyclobutene (Starting material)

|   |             |             |             |
|---|-------------|-------------|-------------|
| C | -0.52489000 | 1.55674700  | -0.41408400 |
| C | 0.52526800  | 1.55671100  | 0.41416900  |
| C | 0.60215500  | 0.03559500  | 0.52457000  |
| H | 1.13557000  | 2.32728100  | 0.87277200  |
| H | 0.30638700  | -0.36426600 | 1.50084100  |
| C | -0.60222600 | 0.03588600  | -0.52439400 |
| H | -1.13488300 | 2.32747000  | -0.87287600 |
| H | -0.30646800 | -0.36400300 | -1.50057000 |
| C | -1.83310800 | -0.61537300 | -0.08106500 |
| N | -2.81597300 | -1.11776600 | 0.28105900  |
| C | 1.83275700  | -0.61586000 | 0.08085700  |
| N | 2.81592400  | -1.11776600 | -0.28112800 |

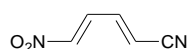

### Butadiene (Product)

|   |             |             |             |
|---|-------------|-------------|-------------|
| C | 1.21742000  | 0.75777000  | -0.14787600 |
| C | -0.23722300 | 0.78615900  | -0.04858900 |
| C | -1.03286200 | -0.29032300 | -0.12993000 |
| H | -0.71335000 | 1.75666300  | 0.07131400  |
| H | -0.73055700 | -1.31313600 | -0.31207100 |
| C | 1.99754200  | -0.29365600 | 0.18820900  |
| H | 1.69310700  | 1.67382100  | -0.49141600 |
| H | 1.57551700  | -1.20876100 | 0.59776000  |
| C | 3.41749900  | -0.26324700 | 0.05997100  |
| N | 4.57822600  | -0.26306400 | -0.03530600 |
| N | -2.47866400 | -0.16252800 | 0.00267400  |
| O | -2.97114600 | 0.95332700  | 0.17637100  |
| O | -3.11584300 | -1.21703500 | -0.07235500 |

**Transition state**

|   |             |             |             |
|---|-------------|-------------|-------------|
| C | 1.06532400  | 1.50638800  | -0.06811900 |
| C | -0.26850300 | 1.49236700  | -0.37275500 |
| C | -0.56577900 | 0.09500900  | -0.46892500 |
| H | -0.97026800 | 2.30914000  | -0.50697600 |
| H | -0.16123100 | -0.54530700 | -1.24207300 |
| C | 1.33442900  | 0.19322000  | 0.46947600  |
| H | 1.81067200  | 2.27774300  | -0.24306400 |
| H | 0.84285300  | -0.10646300 | 1.38884000  |
| C | 2.54610200  | -0.51731300 | 0.18819400  |
| N | 3.51520200  | -1.10804700 | -0.07627300 |
| N | -1.86467500 | -0.41679700 | -0.01298100 |
| O | -2.60702900 | 0.36791400  | 0.58474600  |
| O | -2.11111400 | -1.60281800 | -0.24214200 |

**Cyclobutene (Starting material)**

|   |             |             |             |
|---|-------------|-------------|-------------|
| C | -0.86015400 | 1.66926600  | -0.31364900 |
| C | 0.20193600  | 1.66005900  | 0.50313100  |
| C | 0.28576200  | 0.15899600  | 0.55314600  |
| H | 0.79216100  | 2.42521800  | 0.99289600  |
| H | 0.05727500  | -0.34559200 | 1.49365700  |
| C | -0.89227500 | 0.15102900  | -0.50266300 |
| H | -1.50715500 | 2.44046300  | -0.71796200 |
| H | -0.56443300 | -0.18887600 | -1.49186700 |
| C | -2.11153600 | -0.55957800 | -0.12148700 |
| N | -3.09378300 | -1.09659200 | 0.18779400  |
| N | 1.55501600  | -0.48718900 | 0.03622800  |
| O | 2.45536200  | 0.24897600  | -0.35576100 |
| O | 1.57602700  | -1.71439800 | 0.03629400  |

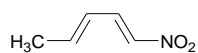**Butadiene (Product)**

|   |             |             |             |
|---|-------------|-------------|-------------|
| C | 0.10711300  | 0.75828000  | -0.05404000 |
| C | 1.56252200  | 0.72197600  | -0.13721500 |
| C | 2.34372800  | -0.34323400 | 0.13042200  |
| H | 2.03889700  | 1.66379200  | -0.40835900 |
| H | 1.87831800  | -1.27328600 | 0.45951200  |
| C | -0.71576600 | -0.30271800 | -0.11447600 |
| H | -0.36144000 | 1.73484200  | 0.04840300  |
| H | -0.43655900 | -1.33619500 | -0.26733000 |
| N | -2.15117700 | -0.14224700 | 0.00905300  |
| O | -2.62881100 | 0.98549900  | 0.16606100  |
| O | -2.81774900 | -1.18289300 | -0.05713300 |
| C | 3.83782000  | -0.35210500 | 0.03879600  |
| H | 4.23304800  | 0.61682500  | -0.28321400 |
| H | 4.28821200  | -0.60680500 | 1.00792600  |
| H | 4.17775100  | -1.11748400 | -0.67264900 |

#### Transition state

|   |             |             |             |
|---|-------------|-------------|-------------|
| C | 0.18816300  | 1.40683700  | -0.34215000 |
| C | 1.51779900  | 1.20388900  | -0.07790100 |
| C | 1.61949000  | -0.14269600 | 0.41378500  |
| H | 2.36395200  | 1.85489000  | -0.29362100 |
| H | 1.07828900  | -0.36729000 | 1.32772400  |
| C | -0.31847000 | 0.07404400  | -0.46668100 |
| H | -0.37979000 | 2.32694900  | -0.44270100 |
| H | -0.03106700 | -0.58818000 | -1.27285700 |
| N | -1.66484000 | -0.25219200 | -0.00898000 |
| O | -2.10397200 | -1.37465200 | -0.28734300 |
| O | -2.27342300 | 0.59973100  | 0.64975300  |
| C | 2.74564300  | -1.08380000 | 0.09662700  |
| H | 3.51907000  | -1.01894200 | 0.87807800  |
| H | 2.39417100  | -2.12227400 | 0.09458100  |
| H | 3.21267700  | -0.87008200 | -0.86970500 |

#### Cyclobutene (Starting material)

|   |             |            |             |
|---|-------------|------------|-------------|
| C | 1.49760500  | 1.21855500 | -0.24083900 |
| C | 0.45275600  | 1.50873200 | 0.54882500  |
| C | -0.04903200 | 0.09011800 | 0.57291400  |

|   |             |             |             |
|---|-------------|-------------|-------------|
| H | 0.08877400  | 2.40624500  | 1.03696500  |
| H | -0.00332300 | -0.46173900 | 1.51364700  |
| C | 1.11856900  | -0.24399200 | -0.44223900 |
| H | 2.33919700  | 1.79891600  | -0.61020600 |
| H | 0.72004900  | -0.44480100 | -1.44516700 |
| N | -1.42813800 | -0.17602200 | 0.01748100  |
| O | -1.98483600 | 0.71706800  | -0.61643400 |
| O | -1.88815000 | -1.30151400 | 0.21140400  |
| C | 2.10550000  | -1.33304000 | -0.03400800 |
| H | 1.63173400  | -2.32093400 | -0.06000500 |
| H | 2.95905400  | -1.35119500 | -0.72267600 |
| H | 2.49298200  | -1.16100300 | 0.97738900  |

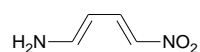

### Butadiene (Product)

|   |             |             |             |
|---|-------------|-------------|-------------|
| C | 0.13813900  | 0.74501600  | -0.01649800 |
| C | 1.57608000  | 0.75159200  | -0.02989200 |
| C | 2.36735300  | -0.35769800 | 0.03534400  |
| H | 2.05470800  | 1.72750400  | -0.08872600 |
| H | 1.92675700  | -1.34813600 | 0.12081300  |
| C | -0.69827800 | -0.32028200 | -0.03354900 |
| H | -0.34664300 | 1.71841700  | 0.00817700  |
| H | -0.42694500 | -1.36580200 | -0.08047600 |
| N | -2.12078200 | -0.13997900 | 0.00250200  |
| O | -2.59989700 | 1.00241500  | 0.05174200  |
| O | -2.80542500 | -1.17642200 | -0.02013300 |
| N | 3.72680300  | -0.36671500 | -0.02055000 |
| H | 4.24801300  | 0.49984700  | -0.01422700 |
| H | 4.24478700  | -1.20468700 | 0.19548400  |

### Transition state

|   |            |             |             |
|---|------------|-------------|-------------|
| C | 0.26956300 | 1.37714200  | -0.40257300 |
| C | 1.56179300 | 1.16023200  | -0.04617400 |
| C | 1.58585600 | -0.21533800 | 0.43947000  |
| H | 2.43331200 | 1.80874100  | -0.11509800 |

|   |             |             |             |
|---|-------------|-------------|-------------|
| H | 1.09325200  | -0.43566500 | 1.38025600  |
| C | -0.29177000 | 0.04683600  | -0.50272800 |
| H | -0.25299900 | 2.31670800  | -0.56102200 |
| H | -0.05095200 | -0.60867400 | -1.33074400 |
| N | -1.61983300 | -0.21248500 | -0.01567500 |
| O | -2.14622900 | -1.29828000 | -0.30954000 |
| O | -2.15283500 | 0.64638500  | 0.70742000  |
| N | 2.58437500  | -1.08358000 | 0.12122600  |
| H | 2.61716200  | -1.99820900 | 0.55158900  |
| H | 3.04829800  | -1.00852600 | -0.77485300 |

### Cyclobutene (Starting material)

|   |             |             |             |
|---|-------------|-------------|-------------|
| C | -0.71085609 | -0.68140823 | -0.00412077 |
| C | -0.71086009 | 0.66193277  | -0.00423777 |
| C | 0.80493591  | 0.77727677  | -0.00415677 |
| H | -1.49911809 | 1.41123577  | -0.00434977 |
| H | 1.25086491  | 1.23757877  | -0.89496077 |
| C | 0.80493891  | -0.79674623 | -0.00402877 |
| H | -1.49911109 | -1.43071523 | -0.00409977 |
| H | 1.19754136  | -1.22033593 | 0.89671263  |
| N | 1.40213119  | 1.39406421  | 1.18908714  |
| O | 1.07104310  | 2.71245606  | 1.23179099  |
| O | 2.54628161  | 1.28742930  | 1.14382342  |
| N | 1.34444352  | -1.37888846 | -1.24134247 |
| H | 2.22570787  | -1.81096623 | -1.04981715 |
| H | 0.70667122  | -2.06412235 | -1.59305402 |

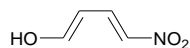

### Butadiene (Product)

|   |             |             |             |
|---|-------------|-------------|-------------|
| C | 1.59481500  | 0.74008900  | -0.11571000 |
| C | 0.14870800  | 0.75488800  | -0.05357300 |
| C | -0.67988000 | -0.30765100 | -0.10627400 |
| H | -0.32562100 | 1.72980800  | 0.03408900  |
| H | -0.40702000 | -1.34420600 | -0.24933500 |
| C | 2.36398000  | -0.34638900 | 0.10357600  |



|   |             |             |             |
|---|-------------|-------------|-------------|
| H | 2.09612000  | 1.68299100  | -0.31962800 |
| H | 1.95022800  | -1.31539200 | 0.37800600  |
| O | 3.71341400  | -0.27683500 | 0.00568000  |
| H | 4.12140300  | -1.11685400 | 0.26369000  |
| N | -2.10912400 | -0.13994800 | 0.00859400  |
| O | -2.78336600 | -1.17783200 | -0.05296200 |
| O | -2.58467000 | 0.99187500  | 0.15539400  |

**Transition state**

|   |             |             |             |
|---|-------------|-------------|-------------|
| C | 0.28004700  | 1.36397700  | -0.36117200 |
| C | 1.59712800  | 1.12086600  | -0.08732200 |
| C | 1.61508100  | -0.22983600 | 0.40347500  |
| H | 2.47877000  | 1.73817100  | -0.24010800 |
| H | 1.12559400  | -0.47126500 | 1.34176300  |
| C | -0.29077200 | 0.05340700  | -0.48840800 |
| H | -0.24703200 | 2.31009200  | -0.44253800 |
| H | -0.04299800 | -0.60609400 | -1.31028200 |
| N | -1.63606300 | -0.20511100 | -0.01079400 |
| O | -2.15364800 | -1.28895400 | -0.31219900 |
| O | -2.17475800 | 0.65737900  | 0.69729500  |
| O | 2.61421300  | -1.06014600 | 0.03150000  |
| H | 2.64273900  | -1.85182300 | 0.59452200  |

**Cyclobutene (Starting material)**

|   |             |             |             |
|---|-------------|-------------|-------------|
| C | 1.60181700  | 1.10704300  | -0.24635600 |
| C | 0.53204400  | 1.49402800  | 0.46599400  |
| C | -0.03737400 | 0.10583200  | 0.56983700  |
| H | 0.18072200  | 2.44211200  | 0.85667300  |
| H | 0.01006100  | -0.40552300 | 1.53212000  |
| C | 1.13754100  | -0.32250000 | -0.41282500 |
| H | 2.49593500  | 1.60773100  | -0.60414100 |
| H | 0.76043400  | -0.56037600 | -1.41687400 |
| N | -1.42248200 | -0.13499900 | 0.03042000  |
| O | -2.00129700 | 0.79317800  | -0.52924900 |
| O | -1.86401200 | -1.27828300 | 0.15487100  |
| O | 2.03913300  | -1.29804900 | 0.04427300  |
| H | 1.71546600  | -2.18013500 | -0.19977900 |

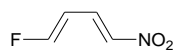**Butadiene (Product)**

|   |             |             |             |
|---|-------------|-------------|-------------|
| C | 0.16305100  | 0.75126400  | -0.07503100 |
| C | 1.61457600  | 0.69572200  | -0.18200400 |
| C | 2.35057400  | -0.36422700 | 0.17219000  |
| H | 2.13183200  | 1.58823700  | -0.52609000 |
| H | 1.99156100  | -1.29349700 | 0.60303500  |
| C | -0.66812600 | -0.30055100 | -0.15278000 |
| H | -0.28781900 | 1.73149100  | 0.06328700  |
| H | -0.40224400 | -1.32949300 | -0.35433200 |
| N | -2.10139000 | -0.12997100 | 0.01118100  |
| O | -2.55949800 | 0.99706000  | 0.21528000  |
| O | -2.77761700 | -1.16119200 | -0.07261300 |
| F | 3.69031900  | -0.35190400 | 0.04669400  |

**Transition state**

|   |             |             |             |
|---|-------------|-------------|-------------|
| C | 0.29473500  | 1.33223500  | -0.36250100 |
| C | 1.62394100  | 1.07156300  | -0.12584700 |
| C | 1.61135900  | -0.24700000 | 0.40401600  |
| H | 2.51188600  | 1.66630400  | -0.32228900 |
| H | 1.15031100  | -0.50872600 | 1.34869400  |
| C | -0.28854600 | 0.03636400  | -0.48197900 |
| H | -0.23039900 | 2.28160200  | -0.40065800 |
| H | -0.04659100 | -0.64565300 | -1.28625000 |
| N | -1.65163800 | -0.19608300 | -0.00549100 |
| O | -2.18154700 | -1.26967400 | -0.30601300 |
| O | -2.17437400 | 0.68557800  | 0.68618400  |
| F | 2.61940800  | -1.10079400 | 0.11727100  |

**Cyclobutene (Starting material)**

|   |             |             |             |
|---|-------------|-------------|-------------|
| C | -0.71085609 | -0.68140823 | -0.00412077 |
| C | -0.71086009 | 0.66193277  | -0.00423777 |
| C | 0.80493591  | 0.77727677  | -0.00415677 |

|   |             |             |             |
|---|-------------|-------------|-------------|
| H | -1.49911809 | 1.41123577  | -0.00434977 |
| H | 1.25086491  | 1.23757877  | -0.89496077 |
| C | 0.80493891  | -0.79674623 | -0.00402877 |
| H | -1.49911109 | -1.43071523 | -0.00409977 |
| H | 1.19754136  | -1.22033593 | 0.89671263  |
| N | 1.40213119  | 1.39406421  | 1.18908714  |
| O | 1.07104310  | 2.71245606  | 1.23179099  |
| O | 2.54628161  | 1.28742930  | 1.14382342  |
| F | 1.30040233  | -1.33136665 | -1.14033727 |

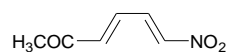

### Butadiene (Product)

|   |             |             |             |
|---|-------------|-------------|-------------|
| C | -0.77115900 | -0.78335300 | -0.06210800 |
| C | 0.68623600  | -0.76128200 | 0.02216200  |
| C | 1.46779400  | 0.32640200  | -0.14617900 |
| H | 1.15135300  | -1.72762500 | 0.20747900  |
| H | 1.03977400  | 1.29743300  | -0.38725100 |
| C | -1.57287800 | 0.27160600  | 0.14769500  |
| H | -1.24800800 | -1.73463600 | -0.28758300 |
| H | -1.27478400 | 1.27173600  | 0.43245600  |
| N | -3.01826000 | 0.14608500  | 0.02219900  |
| O | -3.50700300 | -0.94684400 | -0.27268500 |
| O | -3.66436400 | 1.17783000  | 0.22917000  |
| C | 2.95272900  | 0.33697100  | -0.04834500 |
| C | 3.70502200  | -0.95029900 | 0.23514600  |
| H | 3.50471000  | -1.70312000 | -0.53712200 |
| H | 4.77498700  | -0.73496700 | 0.25725600  |
| H | 3.40449600  | -1.37752500 | 1.19978400  |
| O | 3.54247100  | 1.39974300  | -0.19781500 |

### Transition state

|   |             |            |             |
|---|-------------|------------|-------------|
| C | -0.81084300 | 1.61992700 | -0.07562700 |
| C | 0.52729500  | 1.68849300 | 0.20820600  |
| C | 0.92976600  | 0.33139000 | 0.47049300  |
| H | 1.19910700  | 2.54100100 | 0.16791900  |

|   |             |             |             |
|---|-------------|-------------|-------------|
| H | 0.46885000  | -0.18626500 | 1.30716800  |
| C | -0.99203800 | 0.25005300  | -0.44842100 |
| H | -1.58290400 | 2.38238300  | -0.04569600 |
| H | -0.55169700 | -0.18464800 | -1.33612400 |
| N | -2.22729500 | -0.46196000 | -0.10083100 |
| O | -2.35692100 | -1.60748100 | -0.54309300 |
| O | -3.03883100 | 0.11745300  | 0.62650300  |
| C | 2.25343000  | -0.20269600 | 0.01538900  |
| C | 2.62905300  | -1.60381600 | 0.44354300  |
| H | 3.56147200  | -1.90522200 | -0.03793300 |
| H | 2.75369200  | -1.64411800 | 1.53407100  |
| H | 1.83160800  | -2.31329000 | 0.18778300  |
| O | 2.98212200  | 0.49549900  | -0.67751900 |

### Cyclobutene (Starting material)

|   |             |             |             |
|---|-------------|-------------|-------------|
| C | -0.40706300 | 1.72531400  | -0.55067100 |
| C | 0.59838400  | 1.75971800  | 0.33509000  |
| C | 0.61418100  | 0.26706200  | 0.52957800  |
| H | 1.19451700  | 2.54547800  | 0.78641800  |
| H | 0.33733400  | -0.13791500 | 1.50388300  |
| C | -0.50710500 | 0.20394900  | -0.59222300 |
| H | -0.96844200 | 2.49067400  | -1.07879400 |
| H | -0.14191300 | -0.25398100 | -1.51694600 |
| C | -1.81941800 | -0.48463900 | -0.20925200 |
| O | -2.18295300 | -1.47373100 | -0.81862300 |
| C | -2.64742300 | 0.11612700  | 0.90980700  |
| H | -2.03152100 | 0.44928400  | 1.75254000  |
| H | -3.17389000 | 1.00333900  | 0.53233400  |
| H | -3.38771600 | -0.61145300 | 1.24908400  |
| N | 1.88093100  | -0.46584700 | 0.13876900  |
| O | 2.04808600  | -1.57689100 | 0.63585400  |
| O | 2.63684000  | 0.08191100  | -0.65896500 |

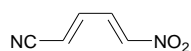

### Butadiene (Product)

|   |             |             |             |
|---|-------------|-------------|-------------|
| C | -0.23714600 | 0.78511100  | -0.04817000 |
| C | 1.21748000  | 0.75745300  | -0.14675300 |
| C | 1.99805500  | -0.29442900 | 0.18679600  |
| H | 1.69272900  | 1.67464600  | -0.48780800 |
| H | 1.57640900  | -1.21106000 | 0.59335700  |
| C | -1.03310700 | -0.29116900 | -0.12880400 |
| H | -0.71372100 | 1.75553500  | 0.07077600  |
| H | -0.73190600 | -1.31453300 | -0.30957700 |
| N | -2.47908700 | -0.16219000 | 0.00273500  |
| O | -2.97097000 | 0.95412500  | 0.17500200  |
| O | -3.11677200 | -1.21643900 | -0.07191600 |
| C | 3.41807700  | -0.26297700 | 0.05953300  |
| N | 4.57884100  | -0.26209700 | -0.03517000 |

#### Transition state

|   |             |             |             |
|---|-------------|-------------|-------------|
| C | -0.26844200 | 1.49227600  | -0.37276300 |
| C | 1.06540600  | 1.50620900  | -0.06820900 |
| C | 1.33434400  | 0.19302100  | 0.46942200  |
| H | 1.81074900  | 2.27759300  | -0.24303200 |
| H | 0.84283200  | -0.10646100 | 1.38887700  |
| C | -0.56573200 | 0.09492500  | -0.46891500 |
| H | -0.97020900 | 2.30907600  | -0.50680900 |
| H | -0.16123900 | -0.54544500 | -1.24204600 |
| N | -1.86472300 | -0.41678000 | -0.01294900 |
| O | -2.11127500 | -1.60265700 | -0.24216000 |
| O | -2.60691500 | 0.36804400  | 0.58474600  |
| C | 2.54609300  | -0.51726700 | 0.18832300  |
| N | 3.51520400  | -1.10791100 | -0.07631200 |

#### Cyclobutene (Starting material)

|   |             |             |             |
|---|-------------|-------------|-------------|
| C | -0.86015400 | 1.66926600  | -0.31364900 |
| C | 0.20193600  | 1.66005900  | 0.50313100  |
| C | 0.28576200  | 0.15899600  | 0.55314600  |
| H | 0.79216100  | 2.42521800  | 0.99289600  |
| H | 0.05727500  | -0.34559200 | 1.49365700  |
| C | -0.89227500 | 0.15102900  | -0.50266300 |
| H | -1.50715500 | 2.44046300  | -0.71796200 |

|   |             |             |             |
|---|-------------|-------------|-------------|
| H | -0.56443300 | -0.18887600 | -1.49186700 |
| C | -2.11153600 | -0.55957800 | -0.12148700 |
| N | -3.09378300 | -1.09659200 | 0.18779400  |
| N | 1.55501600  | -0.48718900 | 0.03622800  |
| O | 2.45536200  | 0.24897600  | -0.35576100 |
| O | 1.57602700  | -1.71439800 | 0.03629400  |

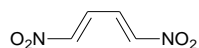

### Butadiene (Product)

|   |             |             |             |
|---|-------------|-------------|-------------|
| C | -0.72720400 | -0.80028000 | -0.06183700 |
| C | 0.72728800  | -0.80040300 | 0.06149500  |
| C | 1.50835300  | 0.26114400  | -0.17824700 |
| H | 1.20919500  | -1.73689200 | 0.33323200  |
| H | 1.19427900  | 1.23951800  | -0.51775400 |
| C | -1.50829000 | 0.26115500  | 0.17837900  |
| H | -1.20914000 | -1.73659600 | -0.33410200 |
| H | -1.19430200 | 1.23936700  | 0.51840200  |
| N | -2.95744900 | 0.17310600  | 0.01829500  |
| O | -3.45869600 | -0.89665600 | -0.32844400 |
| O | -3.58080300 | 1.21177400  | 0.24963200  |
| N | 2.95744100  | 0.17317100  | -0.01821500 |
| O | 3.45844300  | -0.89658200 | 0.32878300  |
| O | 3.58094900  | 1.21158600  | -0.24985600 |

### Transition state

|   |             |             |             |
|---|-------------|-------------|-------------|
| C | -0.67437100 | 1.57296100  | -0.13096500 |
| C | 0.67443100  | 1.57295100  | 0.13087200  |
| C | 0.94637800  | 0.21220400  | 0.46055500  |
| H | 1.40283000  | 2.37518400  | 0.07502000  |
| H | 0.54026700  | -0.28531600 | 1.33165800  |
| C | -0.94639500 | 0.21221500  | -0.46059100 |
| H | -1.40274500 | 2.37521900  | -0.07512800 |
| H | -0.54025300 | -0.28539500 | -1.33162800 |
| N | -2.23684200 | -0.39324100 | -0.08320700 |

|   |             |             |             |
|---|-------------|-------------|-------------|
| O | -2.47387900 | -1.51765800 | -0.52445400 |
| O | -2.97341300 | 0.26170200  | 0.65804400  |
| N | 2.23681900  | -0.39328900 | 0.08320900  |
| O | 2.47376100  | -1.51776400 | 0.52435000  |
| O | 2.97350600  | 0.26172300  | -0.65783400 |

**Cyclobutene (Starting material)**

|   |             |             |             |
|---|-------------|-------------|-------------|
| C | -0.63949400 | 1.74480700  | 0.18812200  |
| C | 0.47101100  | 1.70100800  | -0.56304700 |
| C | 0.58052200  | 0.18628600  | -0.51510400 |
| H | 1.09523400  | 2.43907300  | -1.05485300 |
| H | 0.42654500  | -0.36011800 | -1.44525000 |
| C | -0.62934400 | 0.25969900  | 0.45929700  |
| H | -1.31069100 | 2.52928100  | 0.51573200  |
| H | -0.40956600 | -0.06601800 | 1.47860600  |
| N | 1.87581400  | -0.34559100 | 0.07012200  |
| O | 2.70254400  | -0.75643000 | -0.73726800 |
| O | 2.02612600  | -0.28682600 | 1.28717100  |
| N | -1.84039200 | -0.53659900 | 0.02245200  |
| O | -1.65493600 | -1.72207600 | -0.23465500 |
| O | -2.91694000 | 0.05062100  | -0.00998000 |

## 6.3.4 2,3-Disubstituted butadienes

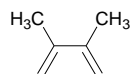**Butadiene (Product)**

|   |             |             |             |
|---|-------------|-------------|-------------|
| C | 0.74561300  | 0.12453300  | -0.02784400 |
| C | -0.74562400 | 0.12454300  | 0.02779500  |
| C | -1.42748900 | 1.18356300  | 0.49561000  |
| H | -2.51500500 | 1.19252600  | 0.51738800  |
| H | -0.92022000 | 2.06360400  | 0.88108700  |
| C | 1.42742800  | 1.18362300  | -0.49561500 |
| H | 0.92005800  | 2.06365600  | -0.88099100 |
| C | 1.45905600  | -1.12389900 | 0.44639000  |
| C | -1.45899300 | -1.12395000 | -0.44638300 |
| H | 2.51494600  | 1.19263500  | -0.51733700 |
| H | 2.54471600  | -0.98571500 | 0.43007600  |
| H | 1.16100500  | -1.38676100 | 1.47038100  |
| H | 1.22174900  | -1.98884600 | -0.18663700 |
| H | -1.22148000 | -1.98887200 | 0.18661900  |
| H | -2.54466600 | -0.98591400 | -0.42988800 |
| H | -1.16104600 | -1.38678400 | -1.47041000 |

**Transition state**

|   |             |             |             |
|---|-------------|-------------|-------------|
| C | 0.69169100  | -0.04134600 | -0.05096100 |
| C | -0.69169100 | -0.04134500 | 0.05096200  |
| C | -1.02807000 | 1.31905500  | 0.33348000  |
| H | -1.94871800 | 1.77701200  | -0.05106200 |
| H | -0.64914800 | 1.79351600  | 1.23135200  |
| C | 1.02807300  | 1.31905500  | -0.33347900 |
| H | 0.64915200  | 1.79351300  | -1.23135300 |
| C | 1.68066200  | -1.15295800 | 0.17403800  |
| C | -1.68066400 | -1.15295400 | -0.17403900 |
| H | 1.94872400  | 1.77701200  | 0.05105600  |
| H | 1.21717400  | -2.02484600 | 0.64852500  |
| H | 2.14900600  | -1.48518200 | -0.76263400 |
| H | 2.49608900  | -0.80902400 | 0.82645700  |



|   |             |             |             |
|---|-------------|-------------|-------------|
| H | -2.49611300 | -0.80900400 | -0.82642300 |
| H | -1.21718900 | -2.02482600 | -0.64856500 |
| H | -2.14897900 | -1.48520900 | 0.76263800  |

### Cyclobutene (Starting material)

|   |             |             |             |
|---|-------------|-------------|-------------|
| C | 0.67494000  | -0.11815000 | 0.00010700  |
| C | -0.67493900 | -0.11815700 | -0.00010800 |
| C | -0.78473300 | 1.39999100  | -0.00026900 |
| H | -1.24690700 | 1.84802100  | 0.89008200  |
| H | -1.24576900 | 1.84732100  | -0.89157800 |
| C | 0.78475500  | 1.39999000  | 0.00026800  |
| H | 1.24690200  | 1.84799200  | -0.89010100 |
| H | 1.24576000  | 1.84728800  | 0.89160300  |
| C | 1.73279400  | -1.17274600 | -0.00013900 |
| C | -1.73280600 | -1.17273200 | 0.00013900  |
| H | -2.38322900 | -1.08511200 | -0.88191500 |
| H | -1.30066300 | -2.18037700 | 0.00057000  |
| H | -2.38334300 | -1.08438400 | 0.88202800  |
| H | 2.38321200  | -1.08514300 | 0.88192100  |
| H | 1.30063000  | -2.18038100 | -0.00057800 |
| H | 2.38334200  | -1.08440500 | -0.88202100 |

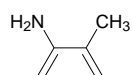

### Butadiene (Product)

|   |             |             |             |
|---|-------------|-------------|-------------|
| C | 0.72508500  | 0.14826100  | -0.03434100 |
| C | -0.76340500 | 0.05690300  | 0.00620900  |
| C | -1.53208000 | 1.04502100  | 0.50802000  |
| H | -2.61767500 | 0.97398700  | 0.51762200  |
| H | -1.08468100 | 1.92129300  | 0.96143300  |
| C | 1.33113500  | 1.24916200  | -0.50683900 |
| H | 0.76294400  | 2.08434400  | -0.90627700 |
| C | 1.50513200  | -1.04087200 | 0.48295400  |
| H | 2.41491100  | 1.34089100  | -0.50684500 |
| H | 2.58025600  | -0.83508300 | 0.47368300  |
| H | 1.20276500  | -1.28824400 | 1.50840500  |

|   |             |             |             |
|---|-------------|-------------|-------------|
| H | 1.32556300  | -1.94081300 | -0.11801100 |
| N | -1.28800500 | -1.17931200 | -0.41718800 |
| H | -0.86320000 | -1.55580000 | -1.25905300 |
| H | -2.30004800 | -1.19623600 | -0.48666900 |

**Transition state**

|   |             |             |             |
|---|-------------|-------------|-------------|
| C | -0.68940100 | -0.15438300 | 0.03951500  |
| C | 0.68177000  | 0.03946400  | -0.04545900 |
| C | 0.79687000  | 1.43920700  | -0.31294500 |
| H | 1.61831700  | 2.02905800  | 0.11651900  |
| H | 0.38706300  | 1.86852800  | -1.22022300 |
| C | -1.25556600 | 1.13405000  | 0.30270100  |
| H | -1.00629900 | 1.63669200  | 1.23017900  |
| C | 1.81561500  | -0.91969500 | 0.18451000  |
| H | -2.22933300 | 1.41530800  | -0.11718400 |
| H | 2.62439400  | -0.42110100 | 0.73755600  |
| H | 1.50136300  | -1.79512800 | 0.76724300  |
| H | 2.26051100  | -1.28359900 | -0.75315600 |
| N | -1.44654100 | -1.29352600 | -0.23798000 |
| H | -0.92730100 | -2.11919200 | -0.51061300 |
| H | -2.19865200 | -1.50774000 | 0.40561100  |

**Cyclobutene (Starting material)**

|   |             |             |             |
|---|-------------|-------------|-------------|
| C | 0.63769100  | -0.28502300 | -0.00509100 |
| C | -0.68200000 | 0.01094500  | -0.01363000 |
| C | -0.42924300 | 1.51249300  | -0.00508500 |
| H | -0.76625700 | 2.05532400  | 0.88991600  |
| H | -0.76387700 | 2.06834000  | -0.89273700 |
| C | 1.10113100  | 1.15396400  | 0.00598900  |
| H | 1.66134400  | 1.48856300  | -0.87813700 |
| H | 1.64273400  | 1.47080400  | 0.90701900  |
| C | -1.95045100 | -0.77724800 | -0.00222500 |
| H | -2.60122800 | -0.50967400 | -0.84771200 |
| H | -1.76014300 | -1.85670100 | -0.06153400 |
| H | -2.53354800 | -0.59925700 | 0.91398000  |
| N | 1.40497800  | -1.44417900 | 0.08790900  |
| H | 2.30433800  | -1.39529100 | -0.37910900 |

|   |            |             |             |
|---|------------|-------------|-------------|
| H | 0.91901400 | -2.30363900 | -0.14679200 |
|---|------------|-------------|-------------|

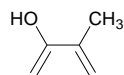

### Butadiene (Product)

|   |             |             |             |
|---|-------------|-------------|-------------|
| C | 0.70460600  | 0.17747500  | -0.02940700 |
| C | -0.77457300 | 0.02268500  | -0.00126700 |
| C | -1.62671900 | 0.92283100  | 0.50937800  |
| H | -2.69758100 | 0.74673600  | 0.48954700  |
| H | -1.25669300 | 1.82526300  | 0.98018500  |
| C | 1.26498900  | 1.31214300  | -0.47792600 |
| H | 0.66271900  | 2.12699500  | -0.86907300 |
| C | 1.53052600  | -0.98490600 | 0.48264900  |
| H | 2.34314500  | 1.45442200  | -0.46374800 |
| H | 2.59532000  | -0.73264400 | 0.48542000  |
| H | 1.23121500  | -1.25613200 | 1.50290600  |
| H | 1.40818000  | -1.88866900 | -0.12949000 |
| O | -1.27854000 | -1.17518200 | -0.47505800 |
| H | -0.65096200 | -1.57588500 | -1.09584000 |

### Transition state

|   |             |             |             |
|---|-------------|-------------|-------------|
| C | -0.67573700 | -0.22393400 | 0.04014400  |
| C | 0.66651600  | 0.09029400  | -0.06173700 |
| C | 0.62681500  | 1.49657800  | -0.32156600 |
| H | 1.36482900  | 2.17393900  | 0.12812100  |
| H | 0.17397900  | 1.88388800  | -1.22666600 |
| C | -1.38740500 | 0.97673700  | 0.31163500  |
| H | -1.17294200 | 1.52228400  | 1.22295300  |
| C | 1.88965500  | -0.74700800 | 0.18458600  |
| H | -2.39448100 | 1.13619200  | -0.08777600 |
| H | 2.62502300  | -0.17540100 | 0.76828300  |
| H | 1.65500100  | -1.65971100 | 0.74601000  |
| H | 2.39454100  | -1.04203000 | -0.74630200 |
| O | -1.32478100 | -1.42147400 | -0.13389300 |
| H | -0.76676600 | -2.02337500 | -0.65186200 |

**Cyclobutene (Starting material)**

|   |             |             |             |
|---|-------------|-------------|-------------|
| C | -0.59915000 | -0.35708400 | 0.00000000  |
| C | 0.67894800  | 0.05978700  | -0.00012400 |
| C | 0.25713000  | 1.52600500  | -0.00013900 |
| H | 0.53017900  | 2.10481000  | -0.89300000 |
| H | 0.53063200  | 2.10514200  | 0.89236100  |
| C | -1.23124400 | 1.01417300  | 0.00015600  |
| H | -1.80991300 | 1.28292800  | 0.89427500  |
| H | -1.81057100 | 1.28309300  | -0.89347900 |
| C | 2.01910800  | -0.59323900 | 0.00010100  |
| H | 2.60754000  | -0.30440100 | 0.88304600  |
| H | 1.92615900  | -1.68490000 | -0.00013400 |
| H | 2.60814100  | -0.30409200 | -0.88233600 |
| O | -1.15164200 | -1.60596900 | -0.00014300 |
| H | -2.11777900 | -1.53268400 | 0.00044400  |

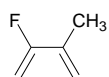**Butadiene (Product)**

|   |             |             |             |
|---|-------------|-------------|-------------|
| C | 0.70826300  | 0.20272800  | -0.01410500 |
| C | -0.75649300 | 0.01713900  | 0.00059700  |
| C | -1.71360700 | 0.86528400  | 0.37917900  |
| H | -2.76001500 | 0.58572900  | 0.32161600  |
| H | -1.45658800 | 1.84554000  | 0.76181600  |
| C | 1.24197600  | 1.39376900  | -0.33058100 |
| H | 0.62845600  | 2.23586400  | -0.63742000 |
| C | 1.54792700  | -1.00203200 | 0.34402000  |
| H | 2.31663300  | 1.55292600  | -0.29845000 |
| H | 2.60992800  | -0.73998000 | 0.36249600  |
| H | 1.26935500  | -1.40091400 | 1.32772300  |
| H | 1.40328700  | -1.81175000 | -0.38035500 |
| F | -1.13105000 | -1.23652700 | -0.41467600 |

**Transition state**

|   |             |             |            |
|---|-------------|-------------|------------|
| C | -0.65198000 | -0.24697300 | 0.03105000 |
|---|-------------|-------------|------------|

|   |             |             |             |
|---|-------------|-------------|-------------|
| C | 0.66935900  | 0.10592400  | -0.06906400 |
| C | 0.55829400  | 1.51661000  | -0.29110500 |
| H | 1.24454700  | 2.22276400  | 0.19222000  |
| H | 0.09055600  | 1.89693300  | -1.19109700 |
| C | -1.44932000 | 0.88816100  | 0.30673000  |
| H | -1.28007200 | 1.44862200  | 1.21851000  |
| C | 1.92099600  | -0.68621600 | 0.16534700  |
| H | -2.45237700 | 0.99426600  | -0.11697100 |
| H | 2.59361500  | -0.14323900 | 0.84419100  |
| H | 1.69973300  | -1.66240100 | 0.60858700  |
| H | 2.47707300  | -0.85439800 | -0.76598500 |
| F | -1.18412900 | -1.48528800 | -0.18302300 |

### Cyclobutene (Starting material)

|   |             |             |             |
|---|-------------|-------------|-------------|
| C | -0.56561200 | 0.41256500  | 0.00000000  |
| C | 0.65970300  | -0.12312800 | -0.00008200 |
| C | 0.05869000  | -1.53139400 | -0.00007100 |
| H | 0.26786800  | -2.13151000 | 0.89418000  |
| H | 0.26766000  | -2.13133900 | -0.89449000 |
| C | -1.36566100 | -0.85445300 | 0.00008100  |
| H | -1.97019400 | -1.04745400 | -0.89392300 |
| H | -1.96976800 | -1.04737800 | 0.89440000  |
| C | 2.06494000  | 0.37023600  | 0.00005100  |
| H | 2.61173200  | 0.01128800  | -0.88277200 |
| H | 2.10135600  | 1.46485900  | 0.00032100  |
| H | 2.61164600  | 0.01083000  | 0.88273800  |
| F | -1.00362800 | 1.69197200  | -0.00003600 |

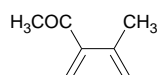

### Butadiene (Product)

|   |             |             |             |
|---|-------------|-------------|-------------|
| C | 1.27394100  | -0.02026200 | -0.01280100 |
| C | -0.06310200 | 0.64861500  | 0.00958800  |
| C | -0.18989900 | 1.98586300  | 0.02379600  |
| H | -1.17384900 | 2.44638500  | 0.03951100  |
| H | 0.68014200  | 2.63670900  | 0.02243300  |

|   |             |             |             |
|---|-------------|-------------|-------------|
| C | 2.08870700  | 0.08805300  | -1.07256900 |
| H | 1.79673400  | 0.64060200  | -1.96181200 |
| C | 1.67129900  | -0.76913200 | 1.24137100  |
| C | -1.33065300 | -0.18223100 | -0.00846100 |
| H | 3.07150500  | -0.37855900 | -1.08217300 |
| H | 2.62724000  | -1.28698800 | 1.11248600  |
| H | 1.76565500  | -0.07290300 | 2.08548900  |
| H | 0.91655200  | -1.50991700 | 1.53519900  |
| C | -1.26065700 | -1.57113400 | -0.61558900 |
| H | -0.50928500 | -2.19429700 | -0.11835700 |
| H | -2.24108700 | -2.04674300 | -0.54434500 |
| H | -0.96046400 | -1.50216100 | -1.66911200 |
| O | -2.38887000 | 0.27365500  | 0.39858400  |

**Transition state**

|   |             |             |             |
|---|-------------|-------------|-------------|
| C | -0.00343000 | -0.44182000 | -0.15837000 |
| C | 1.19609700  | 0.26058400  | 0.03331100  |
| C | 2.09597700  | -0.73436700 | 0.50206500  |
| H | 3.16633200  | -0.70670000 | 0.26944100  |
| H | 1.85120600  | -1.30114800 | 1.39428500  |
| C | 0.41090400  | -1.79920400 | -0.32359400 |
| H | 1.06654500  | -2.05843100 | -1.14636900 |
| C | -1.41381500 | -0.03600500 | 0.00354800  |
| C | 1.58926900  | 1.67408400  | -0.29538400 |
| H | -0.16718600 | -2.63182200 | 0.08474500  |
| H | 2.66178500  | 1.72130700  | -0.52245500 |
| H | 1.03664100  | 2.07984300  | -1.14876800 |
| H | 1.42115200  | 2.34362500  | 0.55987400  |
| C | -1.73131400 | 1.43612300  | 0.20865100  |
| H | -1.39645800 | 2.02755800  | -0.65299400 |
| H | -2.81015800 | 1.55731000  | 0.32886200  |
| H | -1.21703300 | 1.83234600  | 1.09271700  |
| O | -2.30936900 | -0.87753100 | -0.01008800 |

**Cyclobutene (Starting material)**

|   |            |             |            |
|---|------------|-------------|------------|
| C | 0.02201700 | -0.36304400 | 0.00003500 |
| C | 1.13690700 | 0.41696800  | 0.00000100 |

|   |             |             |             |
|---|-------------|-------------|-------------|
| C | 2.08040500  | -0.77413400 | 0.00002700  |
| H | 2.71600400  | -0.86656300 | 0.89047600  |
| H | 2.71599700  | -0.86660400 | -0.89042500 |
| C | 0.79380400  | -1.67151600 | 0.00002800  |
| H | 0.66131700  | -2.29596800 | -0.89020400 |
| H | 0.66128800  | -2.29609500 | 0.89015600  |
| C | -1.43464000 | -0.14876900 | 0.00000700  |
| C | 1.45622700  | 1.87320100  | -0.00005900 |
| H | 2.06190600  | 2.13159800  | -0.88009700 |
| H | 0.56505000  | 2.50649800  | -0.00021300 |
| H | 2.06163700  | 2.13172200  | 0.88014200  |
| C | -1.98206200 | 1.26954500  | 0.00006300  |
| H | -1.63829600 | 1.82002100  | -0.88442700 |
| H | -3.07394800 | 1.23225900  | 0.00010400  |
| H | -1.63820400 | 1.82001800  | 0.88451800  |
| O | -2.19108800 | -1.11629900 | -0.00008000 |

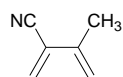

### Butadiene (Product)

|   |             |             |             |
|---|-------------|-------------|-------------|
| C | 0.97410600  | -0.14606900 | -0.03684100 |
| C | -0.33930900 | 0.55323500  | 0.09284600  |
| C | -0.48098200 | 1.84181300  | 0.46055300  |
| H | -1.45758400 | 2.31167700  | 0.52115000  |
| H | 0.38663700  | 2.44198700  | 0.71626400  |
| C | 2.01625500  | 0.47620400  | -0.60919900 |
| H | 1.92910200  | 1.47125500  | -1.03630200 |
| C | 1.05507600  | -1.55748000 | 0.49555300  |
| C | -1.52456200 | -0.22410600 | -0.17604600 |
| H | 2.98722000  | -0.00676700 | -0.68129700 |
| H | 2.06127200  | -1.96594800 | 0.36465700  |
| H | 0.80216100  | -1.59248600 | 1.56328600  |
| H | 0.34671800  | -2.21729900 | -0.02081100 |
| N | -2.46557600 | -0.87200000 | -0.39830600 |

**Transition state**

|   |             |             |             |
|---|-------------|-------------|-------------|
| C | 0.34304300  | -0.36808900 | 0.10121400  |
| C | -0.85723700 | 0.32258200  | -0.06720800 |
| C | -1.78045100 | -0.70068400 | -0.42220400 |
| H | -2.83369600 | -0.66026000 | -0.12519700 |
| H | -1.58933000 | -1.30774100 | -1.30007800 |
| C | -0.03358500 | -1.72318100 | 0.36184200  |
| H | -0.64249600 | -1.93817000 | 1.23112100  |
| C | 1.67498900  | 0.11583500  | -0.05861100 |
| C | -1.17958100 | 1.76293800  | 0.20076500  |
| H | 0.54706300  | -2.57072600 | -0.01223600 |
| H | -1.98788000 | 1.84057100  | 0.94148600  |
| H | -0.31083100 | 2.30305700  | 0.58876900  |
| H | -1.52744000 | 2.27349300  | -0.70562500 |
| N | 2.76307800  | 0.51476700  | -0.18757500 |

**Cyclobutene (Starting material)**

|   |             |             |             |
|---|-------------|-------------|-------------|
| C | 0.34026300  | -0.31462600 | -0.00023500 |
| C | -0.78733000 | 0.43641700  | 0.00006900  |
| C | -1.70283300 | -0.77724400 | 0.00043600  |
| H | -2.33446000 | -0.88830200 | -0.88979700 |
| H | -2.33269100 | -0.88825900 | 0.89195500  |
| C | -0.39665100 | -1.64839000 | -0.00032200 |
| H | -0.24986200 | -2.26660100 | 0.89201200  |
| H | -0.25068700 | -2.26536000 | -0.89367800 |
| C | 1.72173200  | 0.01456800  | -0.00009900 |
| C | -1.07235100 | 1.89605900  | -0.00017600 |
| H | -1.66392500 | 2.17729600  | 0.88183100  |
| H | -0.15013600 | 2.48610000  | -0.00126000 |
| H | -1.66569800 | 2.17655800  | -0.88119500 |
| N | 2.86149700  | 0.26112300  | 0.00030000  |



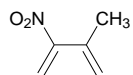

### Butadiene (Product)

|   |             |             |             |
|---|-------------|-------------|-------------|
| C | 1.25004100  | 0.02872000  | -0.00546500 |
| C | -0.12019700 | 0.59074900  | 0.10434600  |
| C | -0.43995500 | 1.85401400  | 0.39874300  |
| H | -1.47352000 | 2.17794300  | 0.44417900  |
| H | 0.34383500  | 2.57549100  | 0.60178800  |
| C | 2.12300900  | 0.60118500  | -0.84733300 |
| H | 1.83646400  | 1.41664100  | -1.50552200 |
| C | 1.62008500  | -1.12144200 | 0.90402200  |
| H | 3.15076500  | 0.25285100  | -0.91182900 |
| H | 2.67395900  | -1.38619900 | 0.77591900  |
| H | 1.45796900  | -0.85444800 | 1.95666300  |
| H | 1.01397300  | -2.00771700 | 0.69041300  |
| N | -1.25091700 | -0.35051000 | -0.15646100 |
| O | -2.38892900 | -0.01168300 | 0.16498800  |
| O | -0.96668600 | -1.41836100 | -0.70027000 |

### Transition state

|   |             |             |             |
|---|-------------|-------------|-------------|
| C | 0.07313800  | -0.38966900 | 0.12598000  |
| C | -1.18011400 | 0.18503100  | -0.04658700 |
| C | -1.96302900 | -0.94142400 | -0.42508200 |
| H | -3.00711800 | -1.04988100 | -0.11556600 |
| H | -1.69439000 | -1.50875800 | -1.30968100 |
| C | -0.10531600 | -1.78096200 | 0.34146400  |
| H | -0.67847500 | -2.10925600 | 1.20020100  |
| C | -1.68666600 | 1.56491400  | 0.23431800  |
| H | 0.57078100  | -2.52459200 | -0.08314900 |
| H | -2.75972900 | 1.53716600  | 0.45924600  |
| H | -1.14954400 | 2.04122200  | 1.05905700  |
| H | -1.55267600 | 2.20374900  | -0.64839100 |
| N | 1.35916800  | 0.24180200  | -0.03849900 |
| O | 1.38244300  | 1.47253500  | -0.16393500 |
| O | 2.35866900  | -0.48623600 | -0.04516400 |

**Cyclobutene (Starting material)**

|   |             |             |             |
|---|-------------|-------------|-------------|
| C | 0.05382000  | -0.31742400 | -0.00017300 |
| C | -1.12904000 | 0.33371500  | 0.00001900  |
| C | -1.89242500 | -0.98613200 | 0.00014800  |
| H | -2.50498500 | -1.16267200 | -0.89203900 |
| H | -2.50422400 | -1.16260100 | 0.89288600  |
| C | -0.49743200 | -1.71640700 | -0.00019600 |
| H | -0.28366000 | -2.31304300 | 0.89212800  |
| H | -0.28406400 | -2.31270500 | -0.89285300 |
| C | -1.59649000 | 1.74220900  | 0.00002500  |
| H | -2.22552000 | 1.93266400  | 0.88060700  |
| H | -0.75931100 | 2.44298200  | -0.00003200 |
| H | -2.22562300 | 1.93262200  | -0.88048100 |
| N | 1.41156900  | 0.14923400  | -0.00000800 |
| O | 1.61225300  | 1.37069300  | -0.00010700 |
| O | 2.29722200  | -0.71290000 | 0.00021900  |

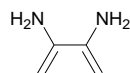**Butadiene (Product)**

|   |             |             |             |
|---|-------------|-------------|-------------|
| C | -0.74541600 | 0.09693800  | -0.00070700 |
| C | 0.74541400  | 0.09694000  | 0.00071200  |
| C | 1.47108400  | 1.17802700  | -0.34963800 |
| H | 2.55737300  | 1.17024700  | -0.30539800 |
| H | 0.99055400  | 2.07519100  | -0.71933100 |
| C | -1.47109200 | 1.17802700  | 0.34963800  |
| H | -0.99053900 | 2.07518400  | 0.71933200  |
| H | -2.55738400 | 1.17023400  | 0.30538100  |
| N | -1.31686000 | -1.15393500 | -0.29272300 |
| H | -2.31848700 | -1.13126000 | -0.44785600 |
| H | -0.83281600 | -1.68643300 | -1.00834900 |
| N | 1.31686400  | -1.15393700 | 0.29271900  |
| H | 0.83284100  | -1.68641100 | 1.00837800  |
| H | 2.31849200  | -1.13123500 | 0.44784900  |

**Transition state**

|   |             |             |             |
|---|-------------|-------------|-------------|
| C | 0.69007900  | -0.07451200 | -0.03357900 |
| C | -0.69006300 | -0.07442100 | 0.03354600  |
| C | -1.03577800 | 1.29670900  | 0.26820800  |
| H | -1.93069500 | 1.72794400  | -0.20456300 |
| H | -0.77711100 | 1.77144500  | 1.20867700  |
| C | 1.03594800  | 1.29658700  | -0.26820300 |
| H | 0.77731700  | 1.77141100  | -1.20863600 |
| H | 1.93090900  | 1.72770900  | 0.20458400  |
| N | -1.56481100 | -1.16145800 | -0.09815000 |
| H | -2.54810700 | -0.93013800 | -0.01700400 |
| H | -1.38330500 | -1.77137100 | -0.89067800 |
| N | 1.56464000  | -1.16157700 | 0.09819200  |
| H | 1.38309900  | -1.77142200 | 0.89075900  |
| H | 2.54796500  | -0.93051400 | 0.01673400  |

**Cyclobutene (Starting material)**

|   |             |             |             |
|---|-------------|-------------|-------------|
| C | 0.67581100  | -0.15889800 | 0.00006600  |
| C | -0.67586700 | -0.15874100 | -0.00006500 |
| C | -0.78657900 | 1.34593400  | -0.00005000 |
| H | -1.23908500 | 1.80289300  | 0.89306900  |
| H | -1.23890600 | 1.80292600  | -0.89324300 |
| C | 0.78691200  | 1.34567500  | 0.00011400  |
| H | 1.23966000  | 1.80269000  | -0.89287500 |
| H | 1.23946900  | 1.80264700  | 0.89322100  |
| N | -1.68577600 | -1.11278100 | -0.00014400 |
| H | -2.65297000 | -0.83518700 | -0.00047300 |
| H | -1.49306600 | -2.10122700 | -0.00026600 |
| N | 1.68548000  | -1.11312500 | 0.00019100  |
| H | 2.65272000  | -0.83569200 | -0.00007500 |
| H | 1.49258700  | -2.10153200 | -0.00008000 |

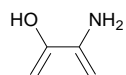

### Butadiene (Product)

|   |             |             |             |
|---|-------------|-------------|-------------|
| C | 0.71363500  | 0.15943000  | 0.01730300  |
| C | -0.76924300 | 0.03963500  | -0.00280700 |
| C | -1.61941300 | 1.01228100  | 0.35794800  |
| H | -2.69208400 | 0.86532100  | 0.28986400  |
| H | -1.24547300 | 1.95597300  | 0.73487700  |
| C | 1.37144000  | 1.27805300  | -0.33469400 |
| H | 0.83818100  | 2.13879200  | -0.72039200 |
| H | 2.45489400  | 1.34370900  | -0.27283700 |
| N | 1.35480300  | -1.07185300 | 0.30740800  |
| H | 2.36779700  | -1.02062700 | 0.26543000  |
| H | 1.06175000  | -1.49104800 | 1.18789700  |
| O | -1.24562600 | -1.18636200 | -0.40055300 |
| H | -0.48218700 | -1.73463800 | -0.65876700 |

### Transition state

|   |             |             |             |
|---|-------------|-------------|-------------|
| C | -0.68556500 | -0.16893500 | 0.04243200  |
| C | 0.67713600  | 0.01432800  | -0.03217600 |
| C | 0.82118500  | 1.42069400  | -0.26640300 |
| H | 1.62954100  | 1.98635000  | 0.21806000  |
| H | 0.48836600  | 1.85319800  | -1.20384100 |
| C | -1.24859000 | 1.11886300  | 0.27399600  |
| H | -1.04826500 | 1.64049800  | 1.20279200  |
| H | -2.19550900 | 1.39881100  | -0.20169900 |
| N | 1.68503100  | -0.95746200 | 0.10729800  |
| H | 2.61544500  | -0.63977700 | -0.13891200 |
| H | 1.69216900  | -1.45674700 | 0.99281300  |
| O | -1.43308400 | -1.30471700 | -0.13737300 |
| H | -0.89728500 | -1.95206700 | -0.62841700 |

### Cyclobutene (Starting material)

|   |             |             |             |
|---|-------------|-------------|-------------|
| C | 0.64775400  | -0.25517000 | 0.00003600  |
| C | -0.68648300 | -0.08138600 | -0.00004900 |

|   |             |             |             |
|---|-------------|-------------|-------------|
| C | -0.57063700 | 1.42713500  | -0.00000700 |
| H | -0.95230100 | 1.93908500  | 0.89434100  |
| H | -0.95218000 | 1.93912900  | -0.89438400 |
| C | 0.99132900  | 1.21248500  | 0.00010000  |
| H | 1.49884400  | 1.60604200  | -0.89345200 |
| H | 1.49871100  | 1.60599500  | 0.89374800  |
| N | -1.80511300 | -0.88540500 | -0.00010400 |
| H | -2.72998400 | -0.48918500 | -0.00046900 |
| H | -1.72535400 | -1.89008200 | -0.00032700 |
| O | 1.41889400  | -1.39759700 | 0.00009200  |
| H | 2.35513000  | -1.15076100 | 0.00005300  |

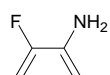

### Butadiene (Product)

|   |             |             |             |
|---|-------------|-------------|-------------|
| C | 0.74209300  | 0.13086300  | 0.00045700  |
| C | -0.73554200 | 0.05884500  | 0.00244500  |
| C | -1.62859900 | 0.99472300  | 0.31584200  |
| H | -2.69166700 | 0.79582800  | 0.23648700  |
| H | -1.30264100 | 1.96776600  | 0.66134100  |
| C | 1.38580000  | 1.27931600  | -0.29407900 |
| H | 0.84017100  | 2.16705700  | -0.58761500 |
| H | 2.46889000  | 1.34877200  | -0.24401100 |
| N | 1.37713500  | -1.05211200 | 0.39176600  |
| H | 2.34921800  | -1.12680000 | 0.11809500  |
| H | 0.86045600  | -1.90127700 | 0.19905100  |
| F | -1.19409800 | -1.18544900 | -0.36374300 |

### Transition state

|   |             |             |             |
|---|-------------|-------------|-------------|
| C | -0.66272300 | -0.18579700 | 0.01737100  |
| C | 0.69106500  | 0.01966700  | -0.05943600 |
| C | 0.77722700  | 1.43904500  | -0.24533100 |
| H | 1.53930000  | 2.01957900  | 0.28766500  |
| H | 0.43150800  | 1.88110600  | -1.17203200 |
| C | -1.30838400 | 1.04703100  | 0.27057900  |
| H | -1.12208600 | 1.58533400  | 1.19296100  |

|   |             |             |             |
|---|-------------|-------------|-------------|
| H | -2.26759200 | 1.28156000  | -0.20312800 |
| N | 1.75906600  | -0.82706200 | 0.22661100  |
| H | 2.53610200  | -0.79024200 | -0.42252700 |
| H | 1.50049200  | -1.78265700 | 0.44585400  |
| F | -1.32381100 | -1.36943600 | -0.17935200 |

### Cyclobutene (Starting material)

|   |             |             |             |
|---|-------------|-------------|-------------|
| C | 0.62066800  | -0.32530600 | 0.00004000  |
| C | -0.68388000 | -0.00910000 | -0.00004500 |
| C | -0.36450700 | 1.47536500  | -0.00000400 |
| H | -0.68107100 | 2.02444200  | 0.89590000  |
| H | -0.68093400 | 2.02446600  | -0.89594300 |
| C | 1.16252800  | 1.07035500  | 0.00011000  |
| H | 1.71377500  | 1.39061800  | -0.89383000 |
| H | 1.71363300  | 1.39058700  | 0.89415000  |
| N | -1.89109300 | -0.65840800 | -0.00011400 |
| H | -2.75634100 | -0.14425600 | -0.00043300 |
| H | -1.94415200 | -1.66518400 | -0.00032000 |
| F | 1.27376500  | -1.51996600 | 0.00007400  |

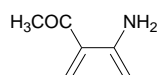

### Butadiene (Product)

|   |             |             |             |
|---|-------------|-------------|-------------|
| C | 1.28107000  | -0.03484800 | 0.04792800  |
| C | -0.04434500 | 0.64984200  | 0.03492300  |
| C | -0.14263000 | 1.98905800  | 0.06290600  |
| H | -1.11709400 | 2.46855500  | 0.03691700  |
| H | 0.74051200  | 2.61984500  | 0.10929400  |
| C | 2.19356500  | 0.14225700  | -0.92698100 |
| H | 1.96696900  | 0.75112800  | -1.79432500 |
| C | -1.32135400 | -0.16652200 | -0.04214000 |
| H | 3.16519000  | -0.34604300 | -0.89635800 |
| N | 1.44568200  | -0.93099700 | 1.11989600  |
| H | 2.38083700  | -1.31505800 | 1.20899800  |
| H | 1.10415400  | -0.58987100 | 2.01311900  |
| C | -1.24030800 | -1.55891200 | -0.63153900 |

|   |             |             |             |
|---|-------------|-------------|-------------|
| H | -0.56519300 | -2.18640200 | -0.03978500 |
| H | -2.23954300 | -1.99841800 | -0.65973100 |
| H | -0.82473700 | -1.51536600 | -1.64645900 |
| O | -2.38585800 | 0.31291900  | 0.31981000  |

**Transition state**

|   |             |             |             |
|---|-------------|-------------|-------------|
| C | 0.00732300  | -0.41920600 | -0.19043300 |
| C | 1.19363500  | 0.31316300  | 0.02082200  |
| C | 2.14117800  | -0.62127700 | 0.52462400  |
| H | 3.21311400  | -0.51458700 | 0.32253300  |
| H | 1.90496500  | -1.15647100 | 1.43732400  |
| C | 0.48452700  | -1.75615600 | -0.34558000 |
| H | 1.15769900  | -2.00806300 | -1.15594100 |
| C | -1.40065800 | -0.06677300 | 0.01163900  |
| H | -0.06499000 | -2.60143600 | 0.07699500  |
| N | 1.46232100  | 1.63110400  | -0.27494200 |
| H | 2.39438700  | 1.97710900  | -0.08829400 |
| H | 1.00644800  | 2.05745900  | -1.07088300 |
| C | -1.76920500 | 1.39336300  | 0.22938400  |
| H | -1.02801600 | 1.92557800  | 0.83489900  |
| H | -1.83160400 | 1.90469700  | -0.74169600 |
| H | -2.75421500 | 1.44589900  | 0.70030500  |
| O | -2.27185500 | -0.93832400 | 0.01332600  |

**Cyclobutene (Starting material)**

|   |             |             |             |
|---|-------------|-------------|-------------|
| C | 0.02384900  | -0.36747100 | 0.00486400  |
| C | 1.10857800  | 0.47302800  | 0.00213300  |
| C | 2.12385200  | -0.64700600 | -0.00382600 |
| H | 2.76580800  | -0.70061800 | 0.88473800  |
| H | 2.75351600  | -0.69719500 | -0.90074900 |
| C | 0.88786500  | -1.61944700 | 0.00235700  |
| H | 0.80466600  | -2.25150600 | -0.88895700 |
| H | 0.81093400  | -2.25310800 | 0.89300700  |
| C | -1.41629100 | -0.19993700 | 0.00144900  |
| N | 1.32434700  | 1.81646300  | -0.04377300 |
| H | 2.24717400  | 2.17048800  | 0.16593100  |
| H | 0.56195200  | 2.45880900  | 0.12526800  |

|   |             |             |             |
|---|-------------|-------------|-------------|
| C | -1.97040300 | 1.22306200  | -0.00520600 |
| H | -1.61056300 | 1.78136400  | -0.88007400 |
| H | -3.06208700 | 1.18618700  | -0.03218000 |
| H | -1.65881700 | 1.76727200  | 0.89745100  |
| O | -2.17846400 | -1.16878900 | 0.00391900  |

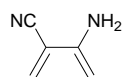

### Butadiene (Product)

|   |             |             |             |
|---|-------------|-------------|-------------|
| C | -0.96676900 | -0.21668700 | 0.01262800  |
| C | 0.30729700  | 0.55830500  | -0.08269900 |
| C | 0.37661500  | 1.86229700  | -0.40922500 |
| H | 1.32446300  | 2.39058700  | -0.43038100 |
| H | -0.52127500 | 2.41599400  | -0.66299800 |
| C | -2.06861800 | 0.33106100  | 0.56433100  |
| H | -2.04426200 | 1.32476900  | 0.99339400  |
| C | 1.52438100  | -0.16858600 | 0.17819600  |
| H | -3.00907100 | -0.21145100 | 0.60733600  |
| N | 2.48125600  | -0.80065700 | 0.37884800  |
| N | -0.92693000 | -1.49201900 | -0.55726500 |
| H | -1.64887100 | -2.12915300 | -0.24292000 |
| H | -0.01869900 | -1.94035300 | -0.59489800 |

### Transition state

|   |             |             |             |
|---|-------------|-------------|-------------|
| C | -0.32869600 | -0.37435700 | -0.10932700 |
| C | 0.84132900  | 0.38168900  | 0.05128500  |
| C | 1.84631800  | -0.55957900 | 0.42260200  |
| H | 2.88976000  | -0.42055600 | 0.12287700  |
| H | 1.70280300  | -1.13180800 | 1.33143300  |
| C | 0.14155100  | -1.70080800 | -0.35927600 |
| H | 0.75932700  | -1.89892000 | -1.22599900 |
| C | -1.67290100 | 0.04701500  | 0.06735900  |
| H | -0.38075600 | -2.57547600 | 0.03913600  |
| N | -2.77107500 | 0.41586700  | 0.21425600  |
| N | 1.06365800  | 1.69821500  | -0.26981200 |
| H | 1.74058800  | 2.21748000  | 0.27289000  |



|   |            |            |             |
|---|------------|------------|-------------|
| H | 0.27458800 | 2.24694200 | -0.58730000 |
|---|------------|------------|-------------|

**Cyclobutene (Starting material)**

|   |             |             |             |
|---|-------------|-------------|-------------|
| C | -0.34264300 | -0.31533100 | 0.00004600  |
| C | 0.76445600  | 0.48627100  | -0.00008200 |
| C | 1.74132900  | -0.66784500 | -0.00000300 |
| H | 2.37315100  | -0.74440000 | 0.89313800  |
| H | 2.37309300  | -0.74456900 | -0.89317100 |
| C | 0.47633100  | -1.60284200 | 0.00012500  |
| H | 0.37869300  | -2.23076400 | -0.89293400 |
| H | 0.37876100  | -2.23060900 | 0.89329900  |
| C | -1.72471400 | -0.03861900 | 0.00007900  |
| N | -2.87011200 | 0.19525800  | 0.00010700  |
| N | 0.99163500  | 1.82021800  | -0.00021400 |
| H | 1.92948600  | 2.19045700  | -0.00031000 |
| H | 0.22760300  | 2.48175000  | -0.00026100 |

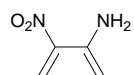**Butadiene (Product)**

|   |             |             |             |
|---|-------------|-------------|-------------|
| C | -1.26623600 | -0.01627900 | 0.01976800  |
| C | 0.09714400  | 0.55799100  | -0.15049300 |
| C | 0.36443100  | 1.80959400  | -0.53318200 |
| H | 1.38302500  | 2.17621600  | -0.58847700 |
| H | -0.44893800 | 2.47444900  | -0.80023400 |
| C | -2.15526700 | 0.64688500  | 0.78687600  |
| H | -1.88030700 | 1.55420900  | 1.31038300  |
| H | -3.17576100 | 0.29103800  | 0.90279300  |
| N | -1.57407500 | -1.14551600 | -0.74964900 |
| H | -2.46149100 | -1.57071600 | -0.50172900 |
| H | -0.83422800 | -1.83988300 | -0.76485900 |
| N | 1.26454800  | -0.32395100 | 0.13825100  |
| O | 1.03237700  | -1.52303700 | 0.32297100  |
| O | 2.38561700  | 0.17451200  | 0.17504000  |

**Transition state**

|   |             |             |             |
|---|-------------|-------------|-------------|
| C | -0.05109500 | -0.39630700 | -0.13906400 |
| C | 1.17049000  | 0.26568200  | 0.04434900  |
| C | 2.07780400  | -0.77542900 | 0.39904400  |
| H | 3.12735800  | -0.74276100 | 0.09456500  |
| H | 1.86940400  | -1.35597900 | 1.28932600  |
| C | 0.22676800  | -1.76460600 | -0.37883000 |
| H | 0.82248700  | -2.04683800 | -1.23766300 |
| H | -0.39704100 | -2.55482600 | 0.04247800  |
| N | 1.48504500  | 1.55916200  | -0.24080700 |
| H | 2.27785900  | 1.97656500  | 0.22724400  |
| H | 0.69929700  | 2.17773800  | -0.41009000 |
| N | -1.34570800 | 0.16491600  | 0.04171500  |
| O | -2.31111600 | -0.59730800 | 0.16969500  |
| O | -1.42869900 | 1.40999700  | 0.05965400  |

**Cyclobutene (Starting material)**

|   |             |             |             |
|---|-------------|-------------|-------------|
| C | -0.03848700 | -0.34896000 | 0.00003900  |
| C | 1.08142900  | 0.43495900  | -0.00008400 |
| C | 2.00217200  | -0.77046800 | -0.00001700 |
| H | 2.62725100  | -0.87200300 | 0.89419600  |
| H | 2.62717200  | -0.87216400 | -0.89426700 |
| C | 0.69635100  | -1.66380600 | 0.00012100  |
| H | 0.57344000  | -2.28606200 | -0.89261400 |
| H | 0.57352100  | -2.28590500 | 0.89297600  |
| N | 1.30165000  | 1.75480900  | -0.00021200 |
| H | 2.23307000  | 2.14273700  | -0.00029300 |
| H | 0.50078600  | 2.37693100  | -0.00023000 |
| N | -1.38229800 | 0.03273200  | 0.00006700  |
| O | -1.61877500 | 1.26590100  | -0.00005600 |
| O | -2.25866300 | -0.84423500 | 0.00016800  |

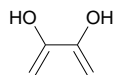**Butadiene (Product)**

|   |             |             |             |
|---|-------------|-------------|-------------|
| C | -0.71793000 | 0.11922700  | -0.00925600 |
| C | 0.76663500  | 0.06410500  | -0.00040300 |
| C | 1.56763600  | 1.11853800  | -0.21292100 |
| H | 2.64516100  | 1.00724700  | -0.16376700 |
| H | 1.15847500  | 2.09330700  | -0.44536200 |
| C | -1.47803700 | 1.19946900  | 0.21874000  |
| H | -1.02875900 | 2.14993300  | 0.47664100  |
| H | -2.56242000 | 1.15901900  | 0.15455900  |
| O | -1.23507800 | -1.13740600 | -0.26470900 |
| H | -2.19874000 | -1.13187300 | -0.15472100 |
| O | 1.30587500  | -1.16980000 | 0.25197500  |
| H | 0.59008200  | -1.82801400 | 0.25756200  |

**Transition state**

|   |             |             |             |
|---|-------------|-------------|-------------|
| C | 0.69626600  | -0.10368200 | -0.04429700 |
| C | -0.67355200 | -0.07302300 | 0.02227400  |
| C | -1.02456400 | 1.29039900  | 0.25318700  |
| H | -1.88644100 | 1.73801200  | -0.25878900 |
| H | -0.76624100 | 1.77149200  | 1.18975300  |
| C | 1.09836400  | 1.24998400  | -0.23454300 |
| H | 0.84691100  | 1.76468000  | -1.15397000 |
| H | 1.98441700  | 1.64038600  | 0.27794700  |
| O | -1.51440100 | -1.13781500 | -0.22140000 |
| H | -2.35338200 | -1.00104600 | 0.24476600  |
| O | 1.57654200  | -1.13626700 | 0.12587600  |
| H | 1.09852400  | -1.90293300 | 0.48476500  |

**Cyclobutene (Starting material)**

|   |             |             |             |
|---|-------------|-------------|-------------|
| C | 0.67071300  | -0.19168500 | 0.00003900  |
| C | -0.67050600 | -0.19148500 | -0.00007400 |
| C | -0.78857000 | 1.31567200  | 0.00001000  |
| H | -1.23462800 | 1.77113600  | 0.89496500  |

|   |             |             |             |
|---|-------------|-------------|-------------|
| H | -1.23447700 | 1.77125000  | -0.89496300 |
| C | 0.78849800  | 1.31655900  | 0.00014700  |
| H | 1.23347300  | 1.77127600  | -0.89550100 |
| H | 1.23331500  | 1.77116000  | 0.89593200  |
| O | -1.60491200 | -1.18677100 | -0.00019500 |
| H | -2.49148400 | -0.79626100 | -0.00031800 |
| O | 1.60510900  | -1.18664600 | 0.00007500  |
| H | 2.49142000  | -0.79559000 | 0.00011300  |

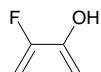

### Butadiene (Product)

|   |             |             |             |
|---|-------------|-------------|-------------|
| C | 0.73507500  | 0.08864600  | 0.00425900  |
| C | -0.74196800 | 0.05319600  | 0.00490400  |
| C | -1.57717800 | 1.02418300  | 0.37120600  |
| H | -2.65052700 | 0.89045300  | 0.29178900  |
| H | -1.19380800 | 1.95753800  | 0.76444100  |
| C | 1.44529400  | 1.16935700  | -0.35723200 |
| H | 0.95085900  | 2.05566900  | -0.73435000 |
| H | 2.53061300  | 1.18628600  | -0.29528900 |
| F | -1.24424500 | -1.13580900 | -0.42614800 |
| O | 1.26978600  | -1.10091600 | 0.41822100  |
| H | 2.23544700  | -1.07263100 | 0.32415800  |

### Transition state

|   |             |             |             |
|---|-------------|-------------|-------------|
| C | -0.67760300 | -0.14796600 | 0.03902100  |
| C | 0.68534300  | -0.06860100 | -0.04480900 |
| C | 0.94102300  | 1.32147200  | -0.25332600 |
| H | 1.76502400  | 1.82259100  | 0.26923500  |
| H | 0.63956800  | 1.79447100  | -1.18049100 |
| C | -1.17455700 | 1.16035500  | 0.25820600  |
| H | -0.93703800 | 1.69028700  | 1.17312700  |
| H | -2.08530700 | 1.50276400  | -0.24390100 |
| F | -1.46577700 | -1.23333100 | -0.16971000 |
| O | 1.59163400  | -1.05621700 | 0.21712900  |
| H | 2.43144700  | -0.85195700 | -0.22217100 |

**Cyclobutene (Starting material)**

|   |             |             |             |
|---|-------------|-------------|-------------|
| C | 0.65558800  | -0.24642200 | 0.00005000  |
| C | -0.67700800 | -0.13382700 | -0.00007700 |
| C | -0.62718200 | 1.38242800  | 0.00001400  |
| H | -1.02576200 | 1.87409900  | 0.89643100  |
| H | -1.02560000 | 1.87420000  | -0.89642000 |
| C | 0.94522800  | 1.22674200  | 0.00014600  |
| H | 1.43560600  | 1.62790700  | -0.89494500 |
| H | 1.43544100  | 1.62782000  | 0.89536600  |
| F | 1.50553200  | -1.29186500 | 0.00008600  |
| O | -1.70044600 | -1.02496100 | -0.00021100 |
| H | -2.54565900 | -0.55107600 | -0.00031800 |

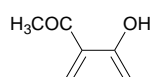**Butadiene (Product)**

|   |             |             |             |
|---|-------------|-------------|-------------|
| C | -1.27354800 | -0.05869000 | -0.04399000 |
| C | 0.03319700  | 0.64646900  | -0.07087300 |
| C | 0.09684700  | 1.98301700  | -0.18522400 |
| H | 1.06046900  | 2.48395000  | -0.17642900 |
| H | -0.79862700 | 2.58682000  | -0.29607800 |
| C | -2.28314900 | 0.24268600  | 0.78784000  |
| H | -2.16819700 | 1.01684200  | 1.53654100  |
| H | -3.23633400 | -0.28048100 | 0.74886200  |
| O | -1.33127900 | -1.05871600 | -0.98849300 |
| H | -2.17881900 | -1.52777200 | -0.91601200 |
| C | 1.33014800  | -0.12964900 | 0.06546800  |
| C | 1.26862800  | -1.57428400 | 0.51533800  |
| O | 2.39974400  | 0.41704500  | -0.15675000 |
| H | 0.87290700  | -2.19733100 | -0.29480000 |
| H | 2.27419300  | -1.91005300 | 0.77712000  |
| H | 0.59395700  | -1.69589500 | 1.37138100  |

**Transition state**

|   |            |             |             |
|---|------------|-------------|-------------|
| C | 0.01672600 | -0.41900100 | -0.17009100 |
|---|------------|-------------|-------------|

|   |             |             |             |
|---|-------------|-------------|-------------|
| C | 1.17319200  | 0.34036300  | 0.00793200  |
| C | 2.19125400  | -0.53387200 | 0.46758800  |
| H | 3.24205700  | -0.38771300 | 0.19426600  |
| H | 2.03355100  | -1.07951400 | 1.39088900  |
| C | 0.53562800  | -1.74445900 | -0.29993900 |
| H | 1.18834300  | -1.99412900 | -1.12736600 |
| H | 0.03967600  | -2.59557500 | 0.17355300  |
| O | 1.33608000  | 1.64568700  | -0.34315700 |
| H | 2.15728900  | 1.98982800  | 0.04392600  |
| C | -1.40673500 | -0.08823800 | 0.01032000  |
| C | -1.79270900 | 1.36985000  | 0.17605800  |
| O | -2.25103200 | -0.98172600 | 0.03475000  |
| H | -1.50487800 | 1.94474700  | -0.71247300 |
| H | -2.87227400 | 1.44078200  | 0.32671100  |
| H | -1.26828700 | 1.82202100  | 1.02655200  |

**Cyclobutene (Starting material)**

|   |             |             |             |
|---|-------------|-------------|-------------|
| C | 0.02943200  | -0.34718400 | 0.00017900  |
| C | 1.09698600  | 0.49026300  | -0.00003700 |
| C | 2.14746700  | -0.59296000 | -0.00020200 |
| H | 2.78265900  | -0.63852700 | 0.89350000  |
| H | 2.78198900  | -0.63874000 | -0.89437400 |
| C | 0.92121800  | -1.58221700 | 0.00024300  |
| H | 0.85074900  | -2.21289800 | -0.89206700 |
| H | 0.85115900  | -2.21238500 | 0.89295900  |
| O | 1.19622000  | 1.83605900  | 0.00006900  |
| H | 2.12987300  | 2.10051000  | -0.00052500 |
| C | -1.42482500 | -0.20305200 | 0.00001600  |
| C | -1.99827600 | 1.20374500  | 0.00007000  |
| O | -2.14985500 | -1.19645300 | -0.00022700 |
| H | -1.65481100 | 1.76126700  | -0.88015800 |
| H | -3.08950000 | 1.15117500  | -0.00011800 |
| H | -1.65505600 | 1.76117600  | 0.88042800  |

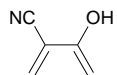

### Butadiene (Product)

|   |             |             |             |
|---|-------------|-------------|-------------|
| C | -0.96695700 | -0.20338000 | 0.00480700  |
| C | 0.32241200  | 0.53212700  | -0.08554500 |
| C | 0.40829200  | 1.84237900  | -0.38105300 |
| H | 1.36491100  | 2.35403600  | -0.40330100 |
| H | -0.48215900 | 2.41817500  | -0.61164400 |
| C | -2.07744300 | 0.30514300  | 0.56068800  |
| H | -2.06597300 | 1.27948500  | 1.03302200  |
| H | -3.01261800 | -0.24871000 | 0.57642100  |
| O | -0.86355900 | -1.45346400 | -0.54138900 |
| H | -1.67685600 | -1.95704600 | -0.37555400 |
| C | 1.52515600  | -0.22305500 | 0.15891800  |
| N | 2.50177400  | -0.81964400 | 0.36646900  |

### Transition state

|   |             |             |             |
|---|-------------|-------------|-------------|
| C | 0.34063700  | 0.33244400  | -0.12323600 |
| C | -0.84277600 | -0.38191200 | 0.03584400  |
| C | -1.83930700 | 0.55782700  | 0.41234100  |
| H | -2.88064700 | 0.44374100  | 0.09344900  |
| H | -1.70287900 | 1.12584500  | 1.32524200  |
| C | -0.11247100 | 1.67424500  | -0.33006000 |
| H | -0.71823200 | 1.90880000  | -1.19610600 |
| H | 0.40923100  | 2.52763800  | 0.11208800  |
| O | -1.02391600 | -1.68881500 | -0.26869600 |
| H | -1.84401000 | -2.01613300 | 0.13475900  |
| C | 1.68435600  | -0.09596500 | 0.05227200  |
| N | 2.79217500  | -0.42845800 | 0.19959600  |

### Cyclobutene (Starting material)

|   |             |             |             |
|---|-------------|-------------|-------------|
| C | -0.35053600 | -0.26684200 | 0.00003900  |
| C | 0.77388400  | 0.48735600  | -0.00007800 |
| C | 1.73662500  | -0.67592400 | -0.00000400 |
| H | 2.36442600  | -0.77175700 | 0.89428400  |

|   |             |             |             |
|---|-------------|-------------|-------------|
| H | 2.36434800  | -0.77194100 | -0.89432800 |
| C | 0.44360900  | -1.57296700 | 0.00014800  |
| H | 0.32650000  | -2.19376800 | -0.89429600 |
| H | 0.32657600  | -2.19357600 | 0.89473500  |
| O | 0.96181700  | 1.81665200  | -0.00021700 |
| H | 1.90970100  | 2.02477900  | -0.00028500 |
| C | -1.73509900 | 0.01389100  | 0.00006400  |
| N | -2.88528500 | 0.20856500  | 0.00008900  |

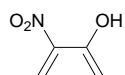

### Butadiene (Product)

|   |             |             |             |
|---|-------------|-------------|-------------|
| C | -1.24688200 | -0.01881600 | -0.05768200 |
| C | 0.09980300  | 0.59325400  | -0.07530200 |
| C | 0.37532100  | 1.88677700  | -0.24515100 |
| H | 1.39699700  | 2.24906600  | -0.22357100 |
| H | -0.42941800 | 2.59458700  | -0.41039300 |
| C | -2.21628400 | 0.37626000  | 0.77894700  |
| H | -2.01822700 | 1.11903800  | 1.54186800  |
| H | -3.21483400 | -0.05183300 | 0.73953900  |
| O | -1.36895900 | -0.98024600 | -1.02347600 |
| H | -2.18266000 | -1.49102700 | -0.88344100 |
| N | 1.23719600  | -0.34434900 | 0.14863200  |
| O | 0.97063300  | -1.41506700 | 0.68915500  |
| O | 2.36282900  | 0.01603400  | -0.19184100 |

### Transition state

|   |             |             |             |
|---|-------------|-------------|-------------|
| C | 0.06064800  | 0.34163100  | -0.16018600 |
| C | -1.17289600 | -0.27420500 | 0.02560100  |
| C | -2.04784300 | 0.76523000  | 0.43676500  |
| H | -3.09785900 | 0.78399100  | 0.12835900  |
| H | -1.82588000 | 1.30635300  | 1.34930000  |
| C | -0.21541900 | 1.72346800  | -0.32340800 |
| H | -0.80616400 | 2.05719300  | -1.16757200 |
| H | 0.40222700  | 2.48725600  | 0.15227000  |
| O | -1.51036600 | -1.53304300 | -0.31127400 |



|   |             |             |            |
|---|-------------|-------------|------------|
| H | -2.37877600 | -1.75578000 | 0.06238400 |
| N | 1.37445700  | -0.20158600 | 0.03354400 |
| O | 2.31599700  | 0.60446100  | 0.05247400 |
| O | 1.48665800  | -1.42200100 | 0.17977700 |

### Cyclobutene (Starting material)

|   |             |             |             |
|---|-------------|-------------|-------------|
| C | -0.05101200 | -0.27666700 | 0.00002600  |
| C | 1.10734900  | 0.42399800  | -0.00009300 |
| C | 1.97067400  | -0.82035600 | -0.00001700 |
| H | 2.58728400  | -0.95977900 | 0.89558700  |
| H | 2.58720700  | -0.95994400 | -0.89564800 |
| C | 0.61461000  | -1.62895100 | 0.00011800  |
| H | 0.45247300  | -2.23920800 | -0.89360500 |
| H | 0.45255400  | -2.23904900 | 0.89396400  |
| O | 1.40052800  | 1.72346900  | -0.00022700 |
| H | 2.36350900  | 1.85061100  | -0.00028500 |
| N | -1.41969800 | 0.09872800  | 0.00005500  |
| O | -1.69324100 | 1.30567200  | -0.00003800 |
| O | -2.25164500 | -0.82062600 | 0.00018900  |

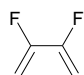

### Butadiene (Product)

|   |             |             |             |
|---|-------------|-------------|-------------|
| C | -0.73540500 | 0.07957000  | -0.00036400 |
| C | 0.73540400  | 0.07958900  | 0.00036200  |
| C | 1.54414500  | 1.08128400  | -0.34219900 |
| H | 2.62039100  | 0.97881300  | -0.25608200 |
| H | 1.13615600  | 2.01048600  | -0.72089300 |
| C | -1.54414500 | 1.08125200  | 0.34218900  |
| H | -1.13628800 | 2.01048300  | 0.72089800  |
| H | -2.62038700 | 0.97888700  | 0.25612900  |
| F | -1.25860200 | -1.10605700 | -0.41129700 |
| F | 1.25861700  | -1.10603700 | 0.41129900  |

**Transition state**

|   |             |             |             |
|---|-------------|-------------|-------------|
| C | 0.67942600  | -0.11024600 | -0.05353400 |
| C | -0.67948700 | -0.11008400 | 0.05325400  |
| C | -1.06561800 | 1.23645700  | 0.26621800  |
| H | -1.93508300 | 1.65911200  | -0.24602800 |
| H | -0.77834700 | 1.74348200  | 1.17935300  |
| C | 1.06590400  | 1.23620400  | -0.26617000 |
| H | 0.77879500  | 1.74379900  | -1.17902000 |
| H | 1.93532400  | 1.65880700  | 0.24617400  |
| F | 1.54038100  | -1.12895300 | 0.17039300  |
| F | -1.54060700 | -1.12873500 | -0.17029100 |

**Cyclobutene (Starting material)**

|   |             |             |             |
|---|-------------|-------------|-------------|
| C | 0.66674000  | -0.18892400 | 0.00005100  |
| C | -0.66670200 | -0.18884500 | -0.00007300 |
| C | -0.79156700 | 1.31204200  | 0.00001300  |
| H | -1.23914100 | 1.75424800  | 0.89672700  |
| H | -1.23899700 | 1.75436000  | -0.89671700 |
| C | 0.79161800  | 1.31195100  | 0.00013800  |
| H | 1.23939100  | 1.75431900  | -0.89639600 |
| H | 1.23924600  | 1.75422300  | 0.89679100  |
| F | -1.61126000 | -1.13852900 | -0.00021300 |
| F | 1.61114500  | -1.13863700 | 0.00008200  |

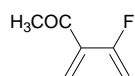**Butadiene (Product)**

|   |             |             |             |
|---|-------------|-------------|-------------|
| C | -1.27151400 | -0.06720300 | -0.03598000 |
| C | 0.01716000  | 0.65232400  | -0.06112900 |
| C | 0.05885300  | 1.99122600  | -0.16697600 |
| H | 1.01460700  | 2.50668400  | -0.14735500 |
| H | -0.84495000 | 2.58214400  | -0.27988500 |
| C | -2.34614100 | 0.17563200  | 0.71287400  |
| H | -2.32825500 | 0.96819900  | 1.45142500  |
| H | -3.24818200 | -0.41734300 | 0.60475100  |

|   |             |             |             |
|---|-------------|-------------|-------------|
| C | 1.32509700  | -0.10949700 | 0.07294000  |
| F | -1.31462900 | -1.10907500 | -0.92851600 |
| C | 1.27742300  | -1.56798300 | 0.47530700  |
| H | 0.90924200  | -2.17494600 | -0.36037700 |
| H | 2.28315100  | -1.89695700 | 0.74443300  |
| H | 0.58962900  | -1.72948600 | 1.31395500  |
| O | 2.38639400  | 0.46204800  | -0.11906600 |

### Transition state

|   |             |             |             |
|---|-------------|-------------|-------------|
| C | 1.16330700  | 0.36198600  | 0.01885600  |
| C | 0.03087800  | -0.41191200 | -0.17135000 |
| C | 0.60692700  | -1.71669800 | -0.28928000 |
| H | 0.16225700  | -2.58159900 | 0.20860800  |
| H | 1.25998300  | -1.94391400 | -1.12272900 |
| C | 2.22742900  | -0.44383600 | 0.46308700  |
| H | 2.10594200  | -1.01280400 | 1.37792600  |
| H | 3.26078700  | -0.24447200 | 0.17024300  |
| F | 1.32622600  | 1.66869900  | -0.30425600 |
| C | -1.40572500 | -0.11971400 | 0.00860600  |
| C | -1.82302500 | 1.32768600  | 0.17810300  |
| H | -2.90813200 | 1.38080000  | 0.28961100  |
| H | -1.33974400 | 1.77295400  | 1.05659700  |
| H | -1.51128900 | 1.92078900  | -0.69047200 |
| O | -2.22057300 | -1.03688900 | 0.02504900  |

### Cyclobutene (Starting material)

|   |             |             |             |
|---|-------------|-------------|-------------|
| C | 0.04716600  | -0.33606000 | 0.00009700  |
| C | 1.09309800  | 0.51212300  | 0.00000700  |
| C | 2.18798800  | -0.50788700 | -0.00004700 |
| H | 2.82157900  | -0.52566000 | 0.89381800  |
| H | 2.82136700  | -0.52571800 | -0.89406200 |
| C | 0.99118200  | -1.53731400 | 0.00007700  |
| H | 0.93744700  | -2.16548900 | -0.89412800 |
| H | 0.93758200  | -2.16543300 | 0.89432900  |
| C | -1.41876600 | -0.23633000 | -0.00001300 |
| F | 1.18285200  | 1.84971200  | -0.00004500 |
| C | -2.03401300 | 1.15029300  | 0.00004600  |

|   |             |             |             |
|---|-------------|-------------|-------------|
| H | -1.70777300 | 1.71695900  | -0.88097000 |
| H | -3.12297300 | 1.06552500  | -0.00025700 |
| H | -1.70828500 | 1.71657300  | 0.88150800  |
| O | -2.10306800 | -1.25414000 | -0.00010500 |

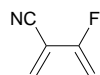

### Butadiene (Product)

|   |             |             |             |
|---|-------------|-------------|-------------|
| C | -0.96307700 | -0.21245000 | 0.00825600  |
| C | 0.30592200  | 0.54450000  | -0.07151600 |
| C | 0.36199200  | 1.86391000  | -0.33483700 |
| H | 1.30716100  | 2.39651700  | -0.34405500 |
| H | -0.54049400 | 2.42676400  | -0.55045700 |
| C | -2.12552200 | 0.19672200  | 0.51307300  |
| H | -2.21320800 | 1.17333000  | 0.97353100  |
| H | -2.99749100 | -0.44739100 | 0.48609600  |
| C | 1.52095500  | -0.19644000 | 0.15317800  |
| F | -0.85432600 | -1.46750000 | -0.50482200 |
| N | 2.50447800  | -0.78845300 | 0.33848000  |

### Transition state

|   |             |             |             |
|---|-------------|-------------|-------------|
| C | -0.83512100 | -0.39682100 | 0.04931000  |
| C | 0.33003200  | 0.32855400  | -0.12458100 |
| C | -0.17517300 | 1.65384700  | -0.32828400 |
| H | 0.29903000  | 2.52480700  | 0.13111400  |
| H | -0.78378000 | 1.86265000  | -1.19875000 |
| C | -1.87506400 | 0.48164200  | 0.41002600  |
| H | -1.76775100 | 1.08006000  | 1.30727400  |
| H | -2.90212200 | 0.31642800  | 0.07749200  |
| F | -1.02834300 | -1.70020700 | -0.22222700 |
| C | 1.68623400  | -0.06027200 | 0.05178600  |
| N | 2.80346600  | -0.36053900 | 0.19048200  |

### Cyclobutene (Starting material)

|   |             |             |            |
|---|-------------|-------------|------------|
| C | -0.33586200 | -0.26499200 | 0.00005600 |
|---|-------------|-------------|------------|

|   |             |             |             |
|---|-------------|-------------|-------------|
| C | 0.76889100  | 0.50235800  | -0.00010900 |
| C | 1.77946500  | -0.60274000 | 0.00002700  |
| H | 2.40833000  | -0.67041800 | 0.89434000  |
| H | 2.40833500  | -0.67061300 | -0.89426700 |
| C | 0.51309000  | -1.54207600 | 0.00011400  |
| H | 0.41123200  | -2.16114100 | -0.89618300 |
| H | 0.41127800  | -2.16101600 | 0.89650100  |
| C | -1.73013900 | -0.02922100 | 0.00009900  |
| F | 0.95351100  | 1.82063700  | -0.00027200 |
| N | -2.88477900 | 0.12821200  | 0.00013500  |

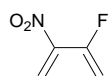

### Butadiene (Product)

|   |             |             |             |
|---|-------------|-------------|-------------|
| C | 1.24325000  | -0.02396200 | 0.04036000  |
| C | -0.09342300 | 0.59430500  | 0.06668200  |
| C | -0.35316500 | 1.89204900  | 0.23375800  |
| H | -1.37150900 | 2.26383000  | 0.20965000  |
| H | 0.45799400  | 2.59266200  | 0.39875000  |
| C | 2.26334200  | 0.32012800  | -0.74054600 |
| H | 2.13875600  | 1.08167000  | -1.50104600 |
| H | 3.22658200  | -0.16904500 | -0.64295900 |
| F | 1.39131000  | -1.00394500 | 0.97102800  |
| N | -1.23828600 | -0.33714500 | -0.14526000 |
| O | -2.36890400 | 0.06243500  | 0.12397800  |
| O | -0.96430100 | -1.44602400 | -0.59752200 |

### Transition state

|   |             |             |             |
|---|-------------|-------------|-------------|
| C | -1.16225300 | -0.30292600 | 0.03910700  |
| C | 0.04598800  | 0.33582800  | -0.15903900 |
| C | -0.29502500 | 1.70596200  | -0.31212900 |
| H | 0.26928100  | 2.49516300  | 0.18731100  |
| H | -0.88711800 | 2.01476500  | -1.16495300 |
| C | -2.09356500 | 0.67859400  | 0.43008700  |
| H | -1.90764200 | 1.24725500  | 1.33418300  |
| H | -3.13341900 | 0.64398900  | 0.09875200  |

|   |             |             |             |
|---|-------------|-------------|-------------|
| N | 1.38093300  | -0.16675500 | 0.03372600  |
| F | -1.50255500 | -1.55782100 | -0.27165400 |
| O | 1.52400900  | -1.38220500 | 0.18053300  |
| O | 2.29405300  | 0.66742400  | 0.04013600  |

### Cyclobutene (Starting material)

|   |             |             |             |
|---|-------------|-------------|-------------|
| C | -0.03298800 | -0.27111300 | 0.00000300  |
| C | 1.10091500  | 0.45055800  | -0.00008400 |
| C | 2.02293500  | -0.73447200 | -0.00001300 |
| H | 2.64345600  | -0.84343000 | 0.89554200  |
| H | 2.64340300  | -0.84358300 | -0.89558600 |
| C | 0.69537400  | -1.59521300 | 0.00010100  |
| H | 0.55366200  | -2.20647000 | -0.89535000 |
| H | 0.55371200  | -2.20631400 | 0.89566700  |
| F | 1.38104700  | 1.74083100  | -0.00020200 |
| N | -1.42257700 | 0.05869300  | 0.00000800  |
| O | -1.73132300 | 1.25431100  | -0.00000900 |
| O | -2.21655600 | -0.88894700 | 0.00018900  |

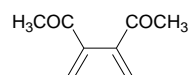

### Butadiene (Product)

|   |             |             |             |
|---|-------------|-------------|-------------|
| C | 0.70703100  | 0.69917400  | -0.23889600 |
| C | -0.70826500 | 0.69957400  | 0.23578900  |
| C | -1.19654200 | 1.66989500  | 1.02644100  |
| H | -2.23837200 | 1.65396100  | 1.33405600  |
| H | -0.56978500 | 2.48437800  | 1.37918800  |
| C | 1.19458600  | 1.66679900  | -1.03328800 |
| H | 0.56727300  | 2.47957000  | -1.38899900 |
| C | -1.65918400 | -0.38934200 | -0.22621400 |
| H | 2.23633500  | 1.65028700  | -1.34114600 |
| C | 1.65890600  | -0.38727200 | 0.22688700  |
| C | 1.26880000  | -1.19680400 | 1.44854400  |
| O | 2.72284100  | -0.57494300 | -0.34306800 |
| H | 2.06082200  | -1.91372500 | 1.67394300  |
| H | 1.11130300  | -0.53448500 | 2.30913900  |

|   |             |             |             |
|---|-------------|-------------|-------------|
| H | 0.32408500  | -1.73269400 | 1.29474600  |
| O | -2.72542700 | -0.57230600 | 0.34097900  |
| C | -1.26428500 | -1.20890700 | -1.43963000 |
| H | -0.32933200 | -1.75704200 | -1.26913900 |
| H | -2.06230900 | -1.91708700 | -1.67139900 |
| H | -1.08561900 | -0.55386700 | -2.30146500 |

### Transition state

|   |             |             |             |
|---|-------------|-------------|-------------|
| C | -0.66091400 | 0.50291700  | 0.10885100  |
| C | 0.72169000  | 0.55589100  | -0.16552600 |
| C | 0.95265300  | 1.93434900  | -0.42973900 |
| H | 1.87879700  | 2.43112600  | -0.13420000 |
| H | 0.40344500  | 2.42063700  | -1.22874400 |
| C | -0.95242400 | 1.83035200  | 0.54098500  |
| H | -0.42722300 | 2.23852600  | 1.39794000  |
| C | -1.65121400 | -0.56661200 | -0.17251000 |
| H | -1.88793300 | 2.34527800  | 0.30540900  |
| C | 1.85295300  | -0.39655500 | 0.03938100  |
| O | -1.30615500 | -1.65455400 | -0.62114200 |
| O | 2.99228900  | 0.00403900  | -0.18051900 |
| C | 1.58846200  | -1.79587100 | 0.54171600  |
| H | 2.54235800  | -2.29957500 | 0.71303900  |
| H | 1.00562900  | -1.77547800 | 1.47071300  |
| H | 0.98907000  | -2.34920200 | -0.18815600 |
| C | -3.11167700 | -0.26960000 | 0.11921000  |
| H | -3.72151600 | -1.11305800 | -0.21099700 |
| H | -3.26811600 | -0.10427000 | 1.19236700  |
| H | -3.44075900 | 0.64091800  | -0.39828900 |

### Cyclobutene (Starting material)

|   |             |            |             |
|---|-------------|------------|-------------|
| C | 0.68478700  | 0.51655300 | 0.00501500  |
| C | -0.68475700 | 0.51659600 | -0.00502600 |
| C | -0.78172900 | 2.02961100 | -0.02219100 |
| H | -1.28421300 | 2.47260000 | 0.84483200  |
| H | -1.22612300 | 2.44632100 | -0.93229600 |
| C | 0.78183400  | 2.02954400 | 0.02241500  |
| H | 1.28436500  | 2.47263800 | -0.84453200 |

|   |             |             |             |
|---|-------------|-------------|-------------|
| H | 1.22627300  | 2.44611800  | 0.93256300  |
| C | 1.84209300  | -0.41655300 | -0.00788300 |
| C | -1.84208700 | -0.41647100 | 0.00777500  |
| C | -1.67425400 | -1.89774100 | 0.27455300  |
| O | -2.95467400 | 0.06239600  | -0.18306400 |
| H | -1.07670000 | -2.07584600 | 1.17560700  |
| H | -2.66283800 | -2.34613600 | 0.39566300  |
| H | -1.16429200 | -2.38650300 | -0.56329000 |
| O | 2.95475800  | 0.06230500  | 0.18264600  |
| C | 1.67407000  | -1.89786500 | -0.27434100 |
| H | 1.07621700  | -2.07603900 | -1.17517900 |
| H | 2.66256200  | -2.34640500 | -0.39568100 |
| H | 1.16432900  | -2.38640600 | 0.56376100  |

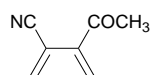

### Butadiene (Product)

|   |             |             |             |
|---|-------------|-------------|-------------|
| C | 0.38263200  | 0.70366800  | -0.15737800 |
| C | -1.05194900 | 0.47324200  | 0.19581200  |
| C | -1.73977200 | 1.26183900  | 1.04333800  |
| H | -2.79279200 | 1.09471800  | 1.24812800  |
| H | -1.24891900 | 2.08746400  | 1.54973000  |
| C | 0.77790200  | 1.88291500  | -0.66381400 |
| H | 0.07168400  | 2.68116600  | -0.87197700 |
| C | -1.73041900 | -0.62577700 | -0.44449000 |
| H | 1.82718400  | 2.04999000  | -0.88875400 |
| N | -2.25914300 | -1.51518700 | -0.97746700 |
| C | 1.43063700  | -0.37144400 | 0.08288900  |
| C | 1.02421400  | -1.63914200 | 0.80320400  |
| O | 2.58027100  | -0.19252400 | -0.28546800 |
| H | 1.92113500  | -2.21166000 | 1.04755400  |
| H | 0.46130800  | -1.41685800 | 1.71786100  |
| H | 0.37276800  | -2.25013000 | 0.16609600  |

### Transition state

|   |             |            |            |
|---|-------------|------------|------------|
| C | -1.01108600 | 0.36982500 | 0.11442300 |
|---|-------------|------------|------------|



|   |             |             |             |
|---|-------------|-------------|-------------|
| C | 0.35644900  | 0.52878900  | -0.16118300 |
| C | 0.48430100  | 1.92481200  | -0.40657700 |
| H | 1.36555200  | 2.48684500  | -0.09276800 |
| H | -0.08839600 | 2.37108800  | -1.21198900 |
| C | -1.44144700 | 1.66107600  | 0.53527000  |
| H | -0.96184300 | 2.11101300  | 1.39702400  |
| C | -1.86808900 | -0.74419200 | -0.12695300 |
| H | -2.43186000 | 2.05541200  | 0.29745800  |
| N | -2.57598600 | -1.64985900 | -0.31905600 |
| C | 1.50699000  | -0.39979300 | 0.00401200  |
| C | 1.22636500  | -1.86249300 | 0.27241500  |
| O | 2.64711700  | 0.04275600  | -0.07094500 |
| H | 2.17148600  | -2.40794000 | 0.31218400  |
| H | 0.69119700  | -1.98865900 | 1.22172900  |
| H | 0.58793600  | -2.28893900 | -0.51113200 |

**Cyclobutene (Starting material)**

|   |             |             |             |
|---|-------------|-------------|-------------|
| C | -1.01334600 | 0.28278800  | -0.00001500 |
| C | 0.32976600  | 0.49822000  | -0.00004700 |
| C | 0.19198500  | 2.00742300  | 0.00009600  |
| H | 0.58657000  | 2.50837200  | -0.89001000 |
| H | 0.58675600  | 2.50829500  | 0.89015800  |
| C | -1.35953400 | 1.76523000  | 0.00019600  |
| H | -1.88995200 | 2.11363800  | 0.89292100  |
| H | -1.89016700 | 2.11389200  | -0.89229900 |
| C | -1.83249600 | -0.87615200 | -0.00011100 |
| N | -2.53399000 | -1.80707700 | -0.00027500 |
| C | 1.53785600  | -0.36022100 | -0.00006500 |
| C | 1.36187200  | -1.86317100 | 0.00043100  |
| O | 2.63941500  | 0.17502600  | -0.00043100 |
| H | 0.79509500  | -2.18922300 | -0.88050300 |
| H | 2.34343200  | -2.34182900 | 0.00109200  |
| H | 0.79427100  | -2.18851700 | 0.88109600  |

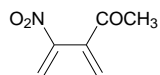

### Butadiene (Product)

|   |             |             |             |
|---|-------------|-------------|-------------|
| C | 0.66011100  | 0.74403500  | -0.13516500 |
| C | -0.75986600 | 0.62564500  | 0.27184800  |
| C | -1.41272600 | 1.40306300  | 1.13958200  |
| H | -2.46788000 | 1.25681700  | 1.34176100  |
| H | -0.88467100 | 2.19438000  | 1.66087200  |
| C | 1.10202800  | 1.86914800  | -0.71882100 |
| H | 0.43331800  | 2.69061300  | -0.95861400 |
| H | 2.15269300  | 1.96714500  | -0.97586600 |
| C | 1.66233200  | -0.35894800 | 0.16980500  |
| C | 1.24829900  | -1.48528900 | 1.09352900  |
| O | 2.78553000  | -0.30337600 | -0.30079500 |
| H | 2.13764800  | -2.04113700 | 1.39738600  |
| H | 0.72267400  | -1.10973100 | 1.97937400  |
| H | 0.56830100  | -2.16723900 | 0.56891600  |
| N | -1.53821300 | -0.45679700 | -0.40307800 |
| O | -0.93576000 | -1.11272800 | -1.25440300 |
| O | -2.71172800 | -0.63129500 | -0.08442200 |

### Transition state

|   |             |             |             |
|---|-------------|-------------|-------------|
| C | -0.73918000 | 0.47542300  | 0.14748200  |
| C | 0.62084900  | 0.56604800  | -0.16530800 |
| C | 0.75782800  | 1.95991800  | -0.41848300 |
| H | 1.63810200  | 2.51916900  | -0.09746400 |
| H | 0.17897800  | 2.41359600  | -1.21590100 |
| C | -1.16025300 | 1.76140400  | 0.55314100  |
| H | -0.67944800 | 2.22357800  | 1.40833200  |
| H | -2.13328500 | 2.17041700  | 0.27972000  |
| C | 1.80460700  | -0.32480200 | 0.03505900  |
| C | 1.62622700  | -1.73395300 | 0.54496200  |
| O | 2.91140200  | 0.14304000  | -0.20530200 |
| H | 2.60290600  | -2.13616500 | 0.82282900  |
| H | 0.94439100  | -1.77144200 | 1.40181100  |
| H | 1.18031100  | -2.35638500 | -0.23843700 |

|   |             |             |             |
|---|-------------|-------------|-------------|
| N | -1.67428100 | -0.59873000 | -0.13478000 |
| O | -1.23228000 | -1.64515000 | -0.61713700 |
| O | -2.86317800 | -0.38487500 | 0.12262000  |

### Cyclobutene (Starting material)

|   |             |             |             |
|---|-------------|-------------|-------------|
| C | 0.75250800  | 0.42771100  | -0.00006900 |
| C | -0.59936600 | 0.53045200  | 0.00000400  |
| C | -0.52259600 | 2.04912200  | 0.00001600  |
| H | -0.94560600 | 2.52248000  | 0.89150400  |
| H | -0.94570200 | 2.52251500  | -0.89140700 |
| C | 1.04198900  | 1.89959800  | -0.00004600 |
| H | 1.55215300  | 2.27649200  | -0.89205400 |
| H | 1.55223900  | 2.27646200  | 0.89192100  |
| C | -1.83899200 | -0.30272900 | 0.00003800  |
| C | -1.77581300 | -1.80791100 | 0.00030200  |
| O | -2.90105100 | 0.30729000  | -0.00014200 |
| H | -1.22666200 | -2.17364200 | 0.87488600  |
| H | -2.79402600 | -2.20277400 | 0.00053100  |
| H | -1.22695900 | -2.17393500 | -0.87434700 |
| N | 1.68946700  | -0.67423000 | -0.00006100 |
| O | 1.24924000  | -1.82736600 | -0.00049300 |
| O | 2.88455000  | -0.36810400 | 0.00037600  |

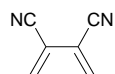

### Butadiene (Product)

|   |             |             |             |
|---|-------------|-------------|-------------|
| C | -0.73374200 | 0.47311900  | 0.14268000  |
| C | 0.73386200  | 0.47306900  | -0.14272600 |
| C | 1.36619300  | 1.52033500  | -0.70300600 |
| H | 2.43862700  | 1.50823400  | -0.86788800 |
| H | 0.81483900  | 2.40095400  | -1.01728200 |
| C | -1.36599800 | 1.52039500  | 0.70304200  |
| H | -0.81460000 | 2.40096200  | 1.01738100  |
| C | -1.47652700 | -0.70765900 | -0.21351900 |
| H | -2.43841500 | 1.50832500  | 0.86802100  |
| N | -2.07266800 | -1.66036000 | -0.51315500 |

|   |            |             |            |
|---|------------|-------------|------------|
| C | 1.47649900 | -0.70779100 | 0.21352200 |
| N | 2.07235700 | -1.66068000 | 0.51312800 |

**Transition state**

|   |             |             |             |
|---|-------------|-------------|-------------|
| C | -0.68848700 | 0.28330000  | 0.12654400  |
| C | 0.68847500  | 0.28329700  | -0.12657000 |
| C | 0.98029100  | 1.63919800  | -0.45549700 |
| H | 1.91801800  | 2.11876800  | -0.16768700 |
| H | 0.47490300  | 2.08617100  | -1.30371200 |
| C | -0.98024500 | 1.63920000  | 0.45551200  |
| H | -0.47487800 | 2.08600100  | 1.30382800  |
| C | 1.64165600  | -0.75909700 | 0.06024900  |
| H | -1.91797100 | 2.11879000  | 0.16774200  |
| N | 2.43606800  | -1.59793100 | 0.20813900  |
| C | -1.64166800 | -0.75905800 | -0.06032000 |
| N | -2.43609800 | -1.59789400 | -0.20809300 |

**Cyclobutene (Starting material)**

|   |             |             |             |
|---|-------------|-------------|-------------|
| C | 0.67892100  | 0.22024800  | 0.00006400  |
| C | -0.67880500 | 0.22003900  | -0.00003900 |
| C | -0.78517100 | 1.73791000  | 0.00002500  |
| H | -1.25165200 | 2.16659200  | 0.89299300  |
| H | -1.25148300 | 2.16668300  | -0.89298800 |
| C | 0.78437400  | 1.73831100  | 0.00017700  |
| H | 1.25080400  | 2.16742600  | -0.89262500 |
| H | 1.25063500  | 2.16730900  | 0.89312300  |
| C | -1.66087500 | -0.80258500 | -0.00017700 |
| N | -2.50044900 | -1.61020400 | -0.00029300 |
| C | 1.66124200  | -0.80213700 | 0.00008400  |
| N | 2.50096000  | -1.60961400 | 0.00010600  |

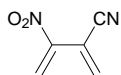

### Butadiene (Product)

|   |             |             |             |
|---|-------------|-------------|-------------|
| C | -0.99667900 | 0.50023100  | 0.16749900  |
| C | 0.43996900  | 0.62205000  | -0.19080800 |
| C | 1.00842900  | 1.66267300  | -0.80114800 |
| H | 2.07477500  | 1.67738900  | -0.99686700 |
| H | 0.40502700  | 2.50588600  | -1.11943900 |
| C | -1.61909200 | 1.41972000  | 0.92591800  |
| H | -1.06861800 | 2.25060200  | 1.35598800  |
| C | -1.73631100 | -0.60511600 | -0.38478000 |
| H | -2.68118400 | 1.34951900  | 1.13761400  |
| N | 1.30362200  | -0.52536600 | 0.20745800  |
| N | -2.34290500 | -1.47522800 | -0.86141900 |
| O | 0.77127400  | -1.39111600 | 0.89983900  |
| O | 2.47461100  | -0.53095800 | -0.16229700 |

### Transition state

|   |             |             |             |
|---|-------------|-------------|-------------|
| C | 0.41499700  | 0.42430000  | -0.14168100 |
| C | -0.94982900 | 0.39276100  | 0.12394000  |
| C | -1.22368100 | 1.74872800  | 0.47255900  |
| H | -2.14417300 | 2.25199600  | 0.17074300  |
| H | -0.71740400 | 2.17650700  | 1.33030800  |
| C | 0.75149400  | 1.76811300  | -0.42407900 |
| H | 0.26997900  | 2.25875900  | -1.26271200 |
| C | -1.92357000 | -0.62271000 | -0.09731900 |
| H | 1.68650500  | 2.21490100  | -0.08617800 |
| N | 1.38223000  | -0.64106500 | 0.04435800  |
| N | -2.76361500 | -1.40993600 | -0.26965900 |
| O | 2.57466900  | -0.32805300 | -0.01885200 |
| O | 0.94512100  | -1.77348600 | 0.24690600  |

### Cyclobutene (Starting material)

|   |             |            |             |
|---|-------------|------------|-------------|
| C | 0.40547500  | 0.37857800 | 0.00003700  |
| C | -0.94301500 | 0.33746900 | -0.00007100 |

|   |             |             |             |
|---|-------------|-------------|-------------|
| C | -1.03877900 | 1.86240500  | 0.00002200  |
| H | -1.50553300 | 2.28525900  | 0.89488800  |
| H | -1.50540700 | 2.28537400  | -0.89485500 |
| C | 0.53539500  | 1.87421900  | 0.00013100  |
| H | 0.99952500  | 2.30426200  | -0.89245200 |
| H | 0.99940000  | 2.30415800  | 0.89283000  |
| C | -1.93251100 | -0.67472400 | -0.00020700 |
| N | -2.80207600 | -1.44904500 | -0.00031800 |
| N | 1.40051600  | -0.66623100 | 0.00004900  |
| O | 1.00438100  | -1.83225100 | 0.00002400  |
| O | 2.57856300  | -0.29772600 | 0.00022500  |

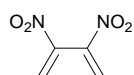

### Butadiene (Product)

|   |             |             |             |
|---|-------------|-------------|-------------|
| C | -0.71005800 | 0.66015000  | 0.19683600  |
| C | 0.71008500  | 0.66015600  | -0.19693700 |
| C | 1.32030100  | 1.59124700  | -0.92953700 |
| H | 2.38315500  | 1.52642700  | -1.13451100 |
| H | 0.75652300  | 2.42166700  | -1.34064100 |
| C | -1.32012300 | 1.59129300  | 0.92959500  |
| H | -0.75612100 | 2.42161400  | 1.34056600  |
| H | -2.38299700 | 1.52653700  | 1.13439300  |
| N | 1.51895700  | -0.46562900 | 0.34971200  |
| O | 2.67295400  | -0.59913500 | -0.04285200 |
| O | 0.96154400  | -1.17564800 | 1.18524700  |
| N | -1.51886500 | -0.46538800 | -0.34975600 |
| O | -0.96176200 | -1.17573300 | -1.18523700 |
| O | -2.67304100 | -0.59900800 | 0.04293700  |

### Transition state

|   |             |            |             |
|---|-------------|------------|-------------|
| C | -0.67701400 | 0.47217000 | 0.14261500  |
| C | 0.67696300  | 0.47225000 | -0.14253100 |
| C | 0.98013000  | 1.81961500 | -0.44754200 |
| H | 1.88962200  | 2.30530800 | -0.09241700 |
| H | 0.49971600  | 2.28256000 | -1.30287200 |

|   |             |             |             |
|---|-------------|-------------|-------------|
| C | -0.98039100 | 1.81948300  | 0.44767600  |
| H | -0.50002600 | 2.28256100  | 1.30296100  |
| H | -1.88991000 | 2.30506300  | 0.09246600  |
| N | -1.68856300 | -0.53784000 | -0.13193600 |
| O | -1.34319400 | -1.56444600 | -0.70886900 |
| O | -2.83731200 | -0.25746400 | 0.22628000  |
| N | 1.68862900  | -0.53771100 | 0.13191700  |
| O | 1.34352000  | -1.56423200 | 0.70916200  |
| O | 2.83723600  | -0.25732500 | -0.22673800 |

**Cyclobutene (Starting material)**

|   |             |             |             |
|---|-------------|-------------|-------------|
| C | 0.67425100  | 0.41789600  | 0.00007500  |
| C | -0.67409600 | 0.41782500  | -0.00001600 |
| C | -0.78770600 | 1.91773400  | 0.00003300  |
| H | -1.25364900 | 2.34245500  | 0.89383100  |
| H | -1.25349900 | 2.34252600  | -0.89380900 |
| C | 0.78767000  | 1.91784500  | 0.00016700  |
| H | 1.25350100  | 2.34273900  | -0.89360100 |
| H | 1.25335200  | 2.34264300  | 0.89405700  |
| N | 1.74244500  | -0.56508700 | 0.00009300  |
| O | 1.45926700  | -1.75756900 | -0.00001100 |
| O | 2.88142600  | -0.08541200 | 0.00026900  |
| N | -1.74240100 | -0.56515900 | -0.00013500 |
| O | -1.45947800 | -1.75761900 | -0.00013700 |
| O | -2.88130600 | -0.08520600 | -0.00033900 |

## 7 Intrinsic reaction coordinates (IRC) for

### 7.1 Butadiene

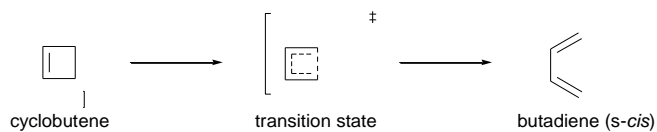

### IRC

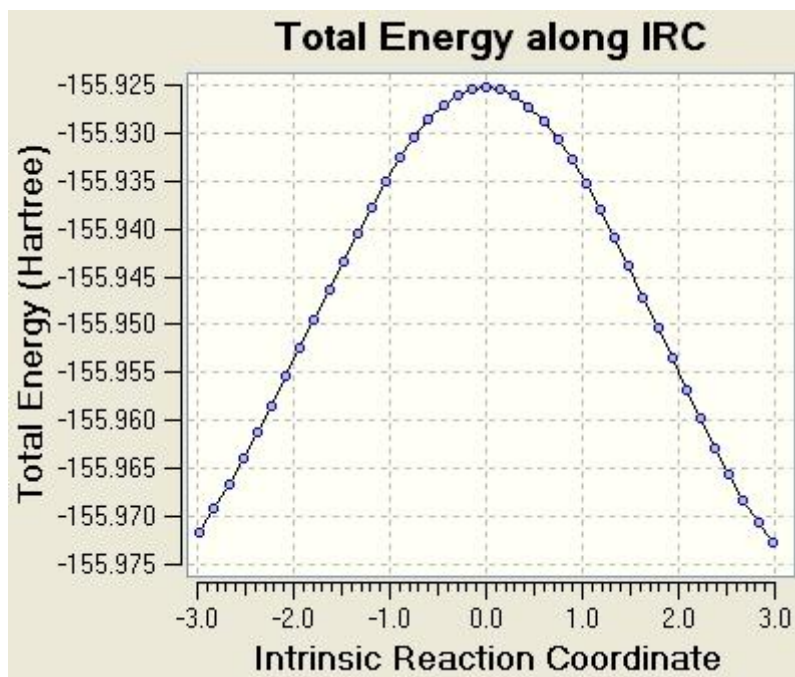



## 7.2 Monosubstituted Butadiene

### 7.2.1 1-Substituted butadienes (outward rotation of substituents)

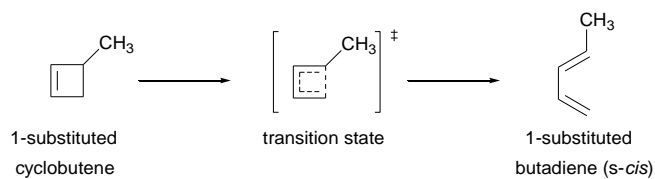

### IRC

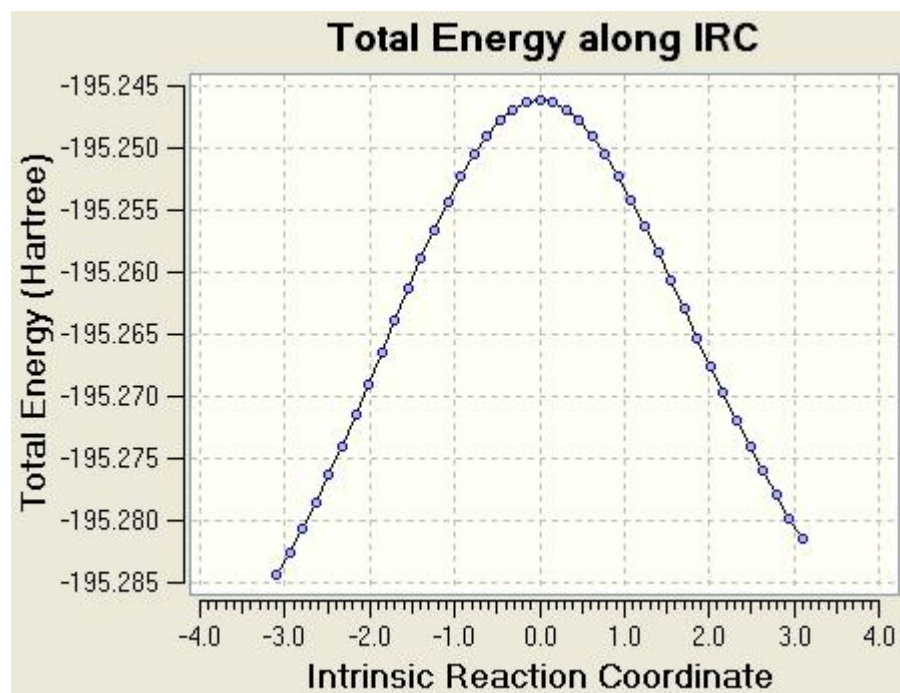

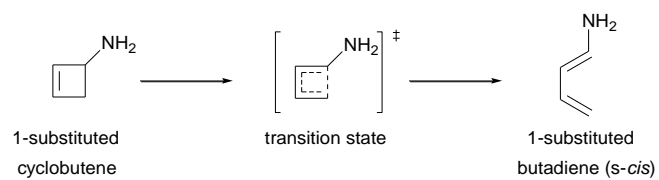

## IRC

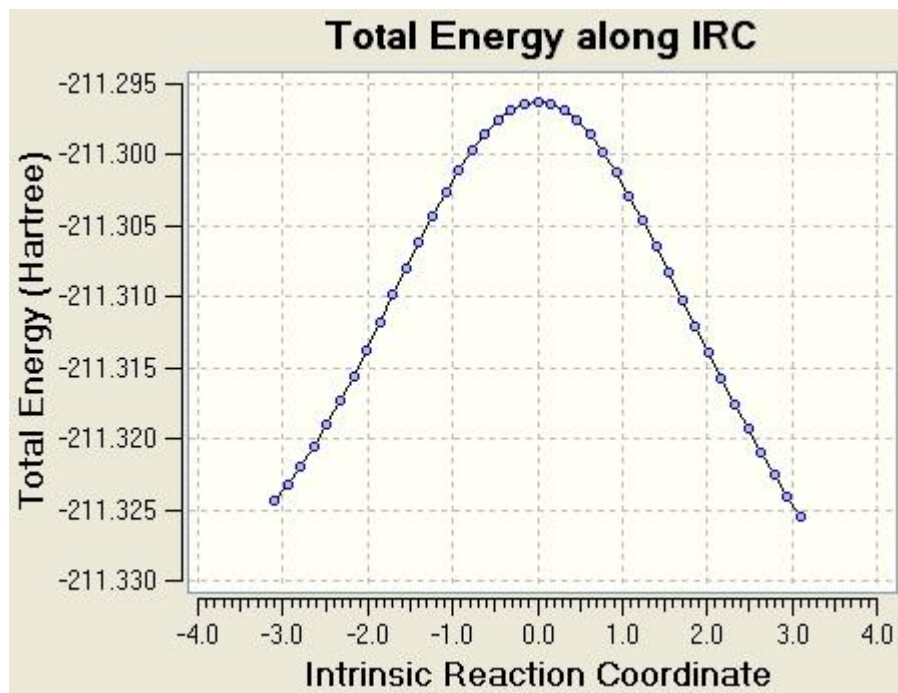

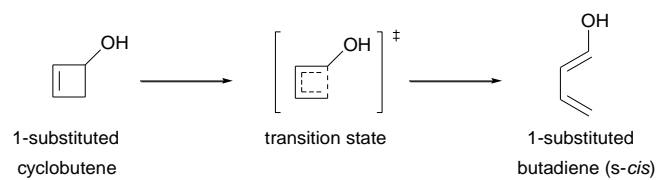

## IRC

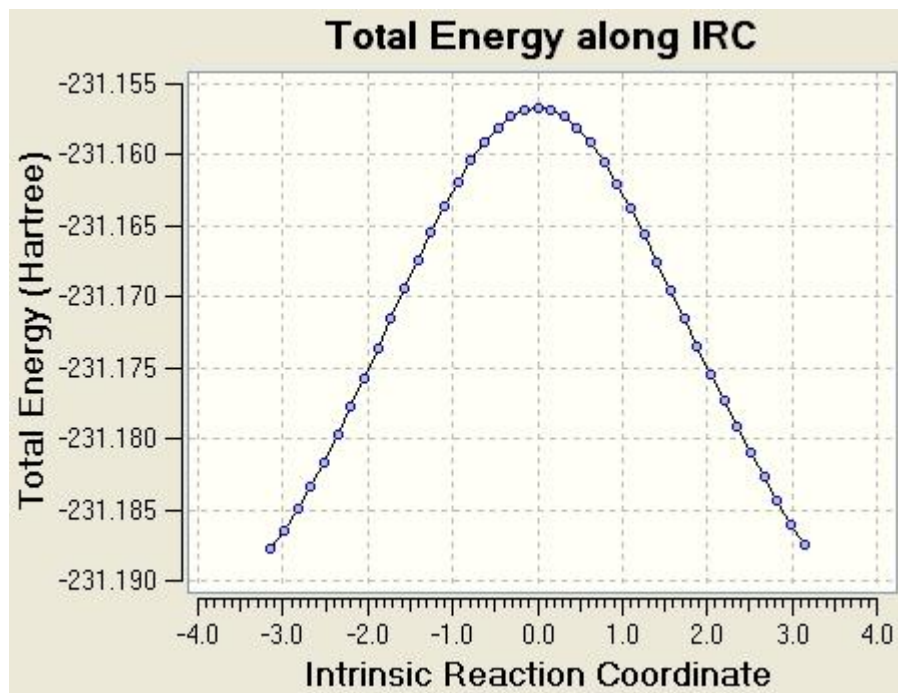

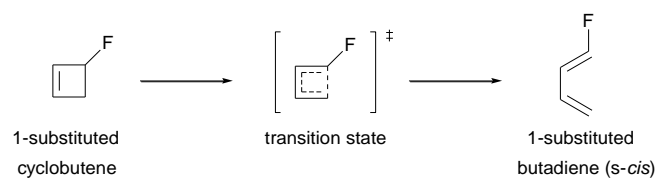

## IRC

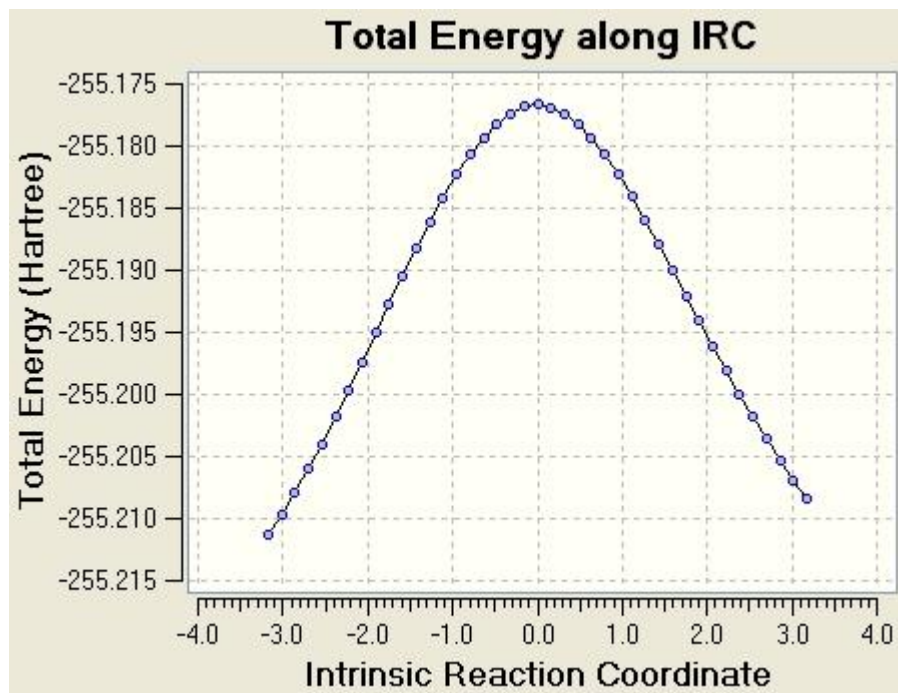

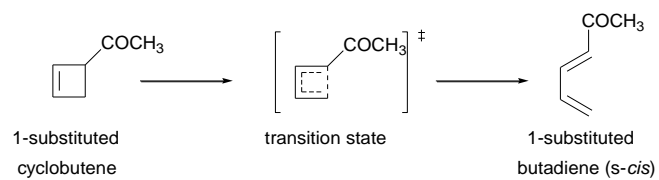

## IRC

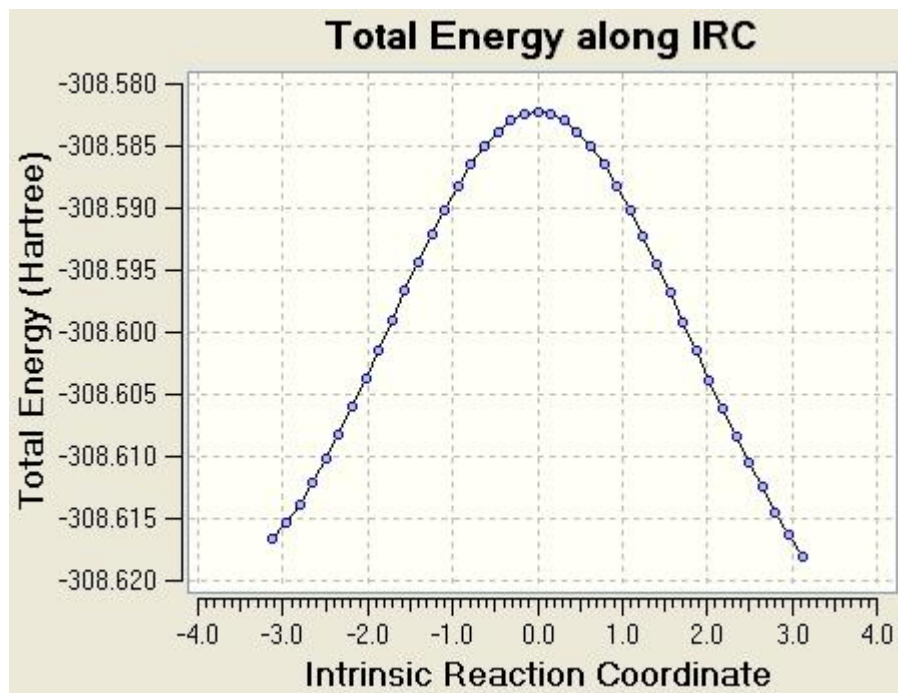

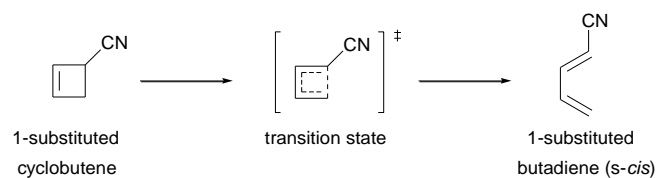

## IRC

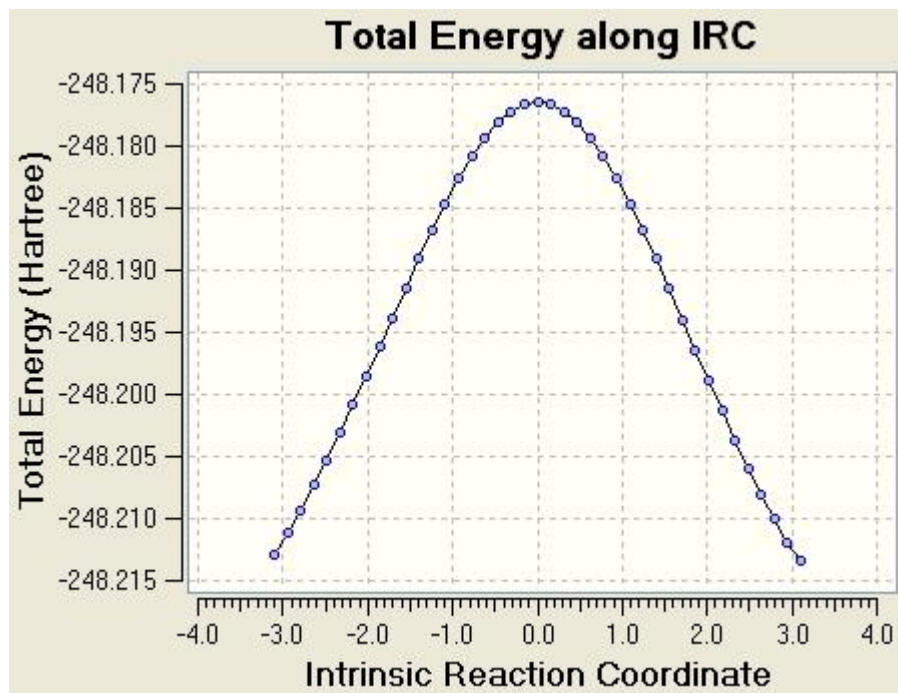

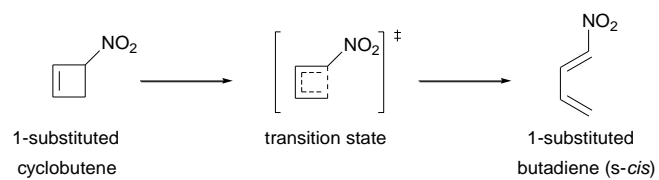

## IRC

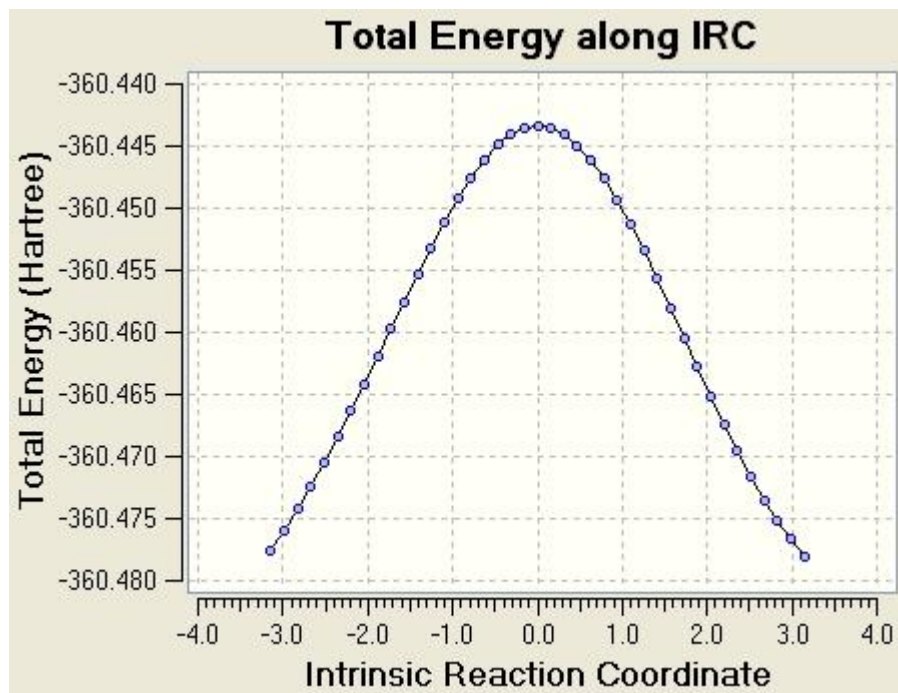

## 7.2.2 1-Substituted butadienes (intward rotation of substituents)

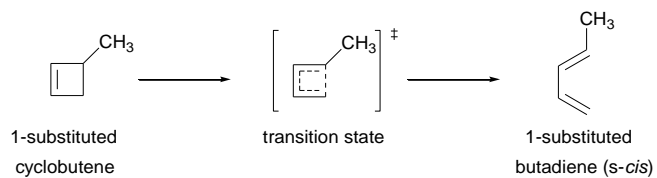

### IRC

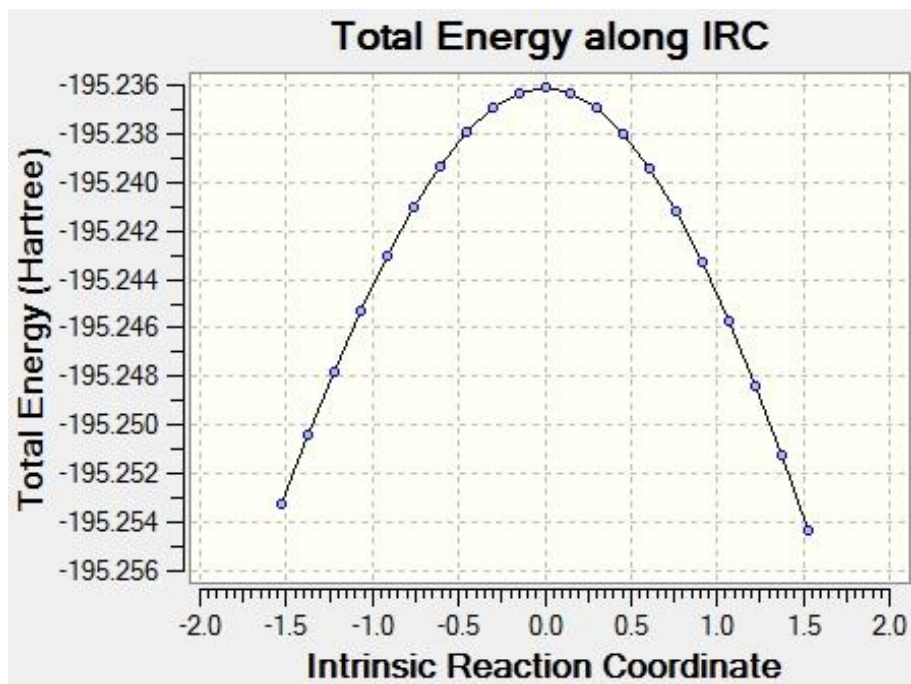



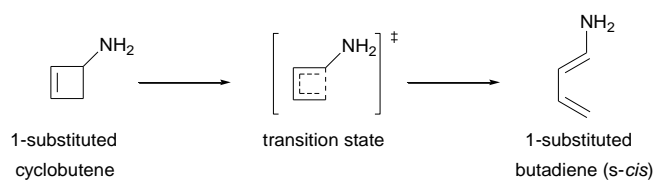

## IRC

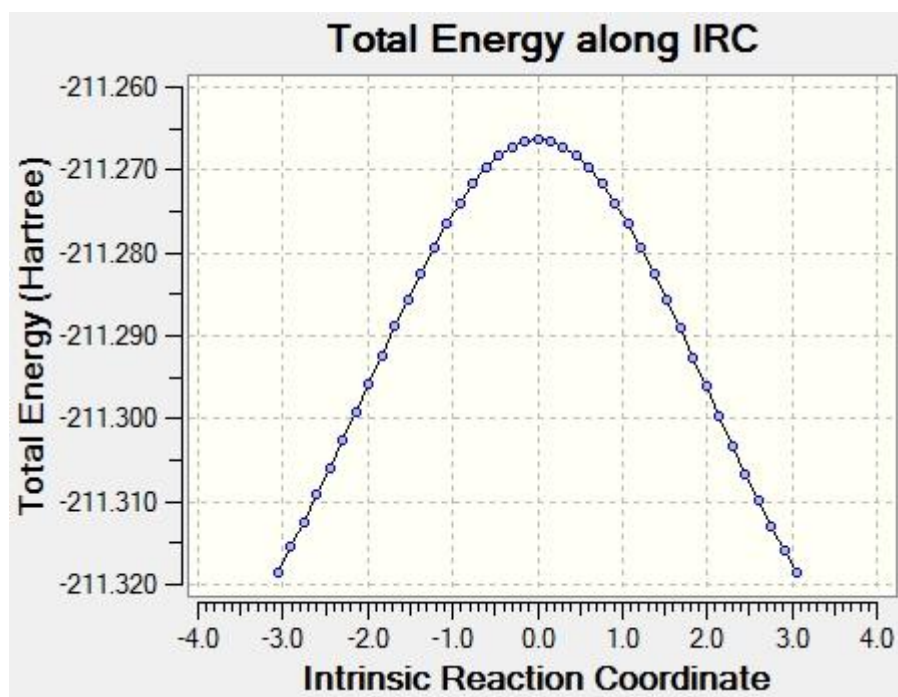

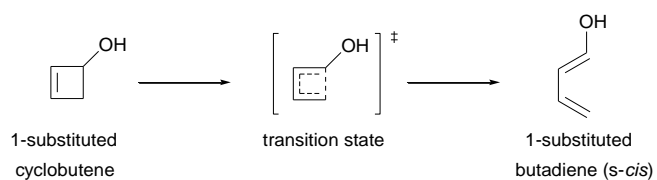

## IRC

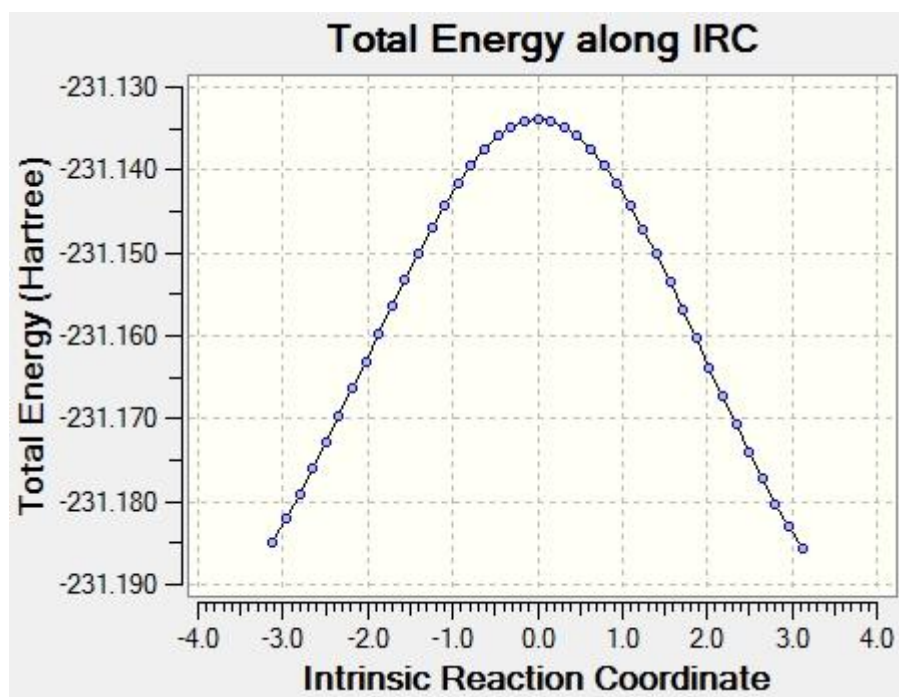

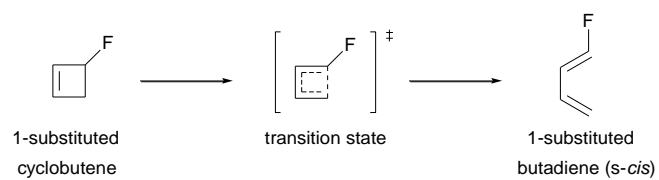

## IRC

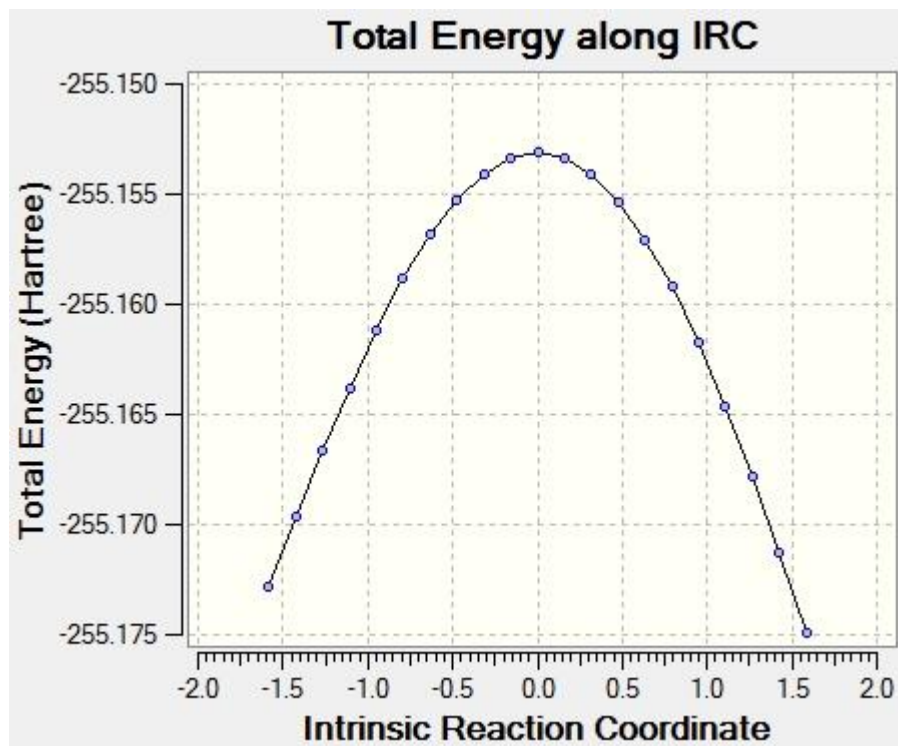



## IRC

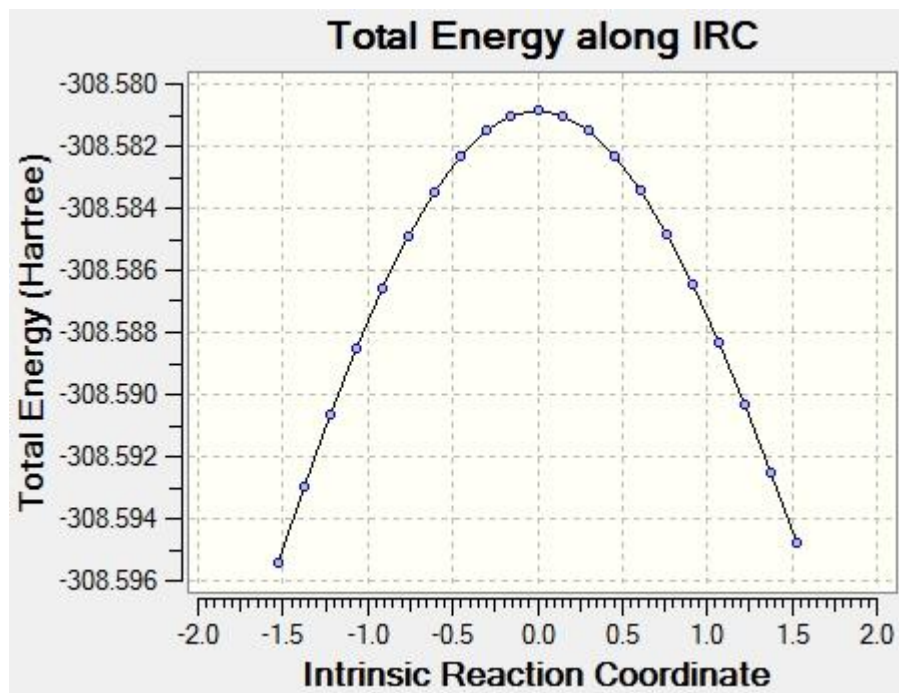

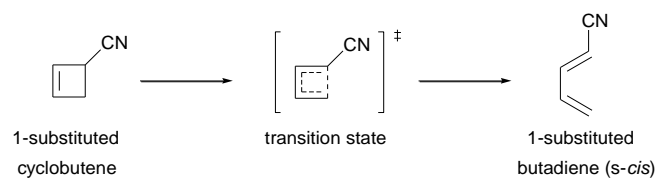

## IRC

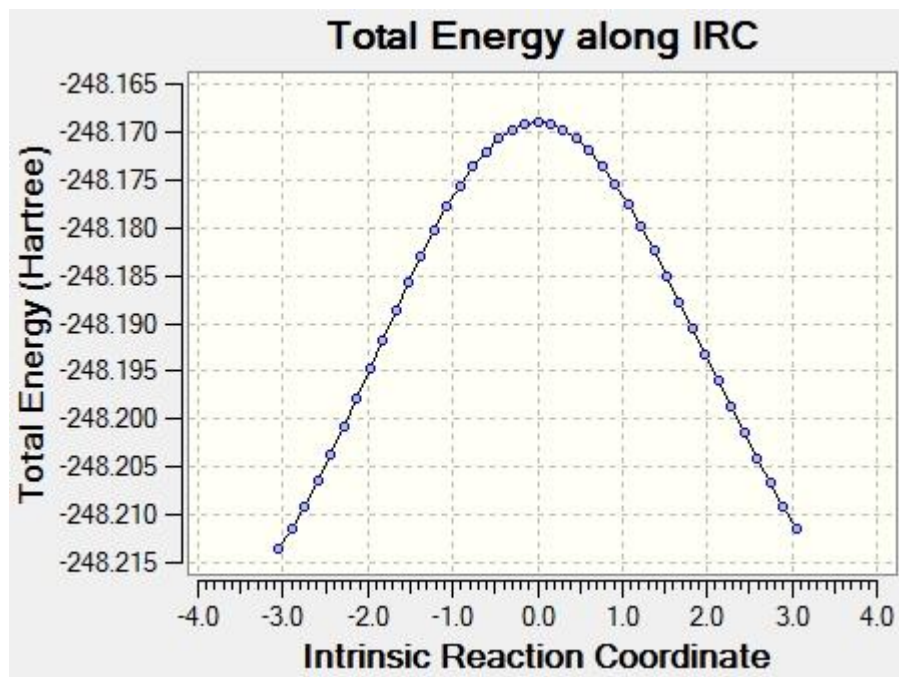



## IRC

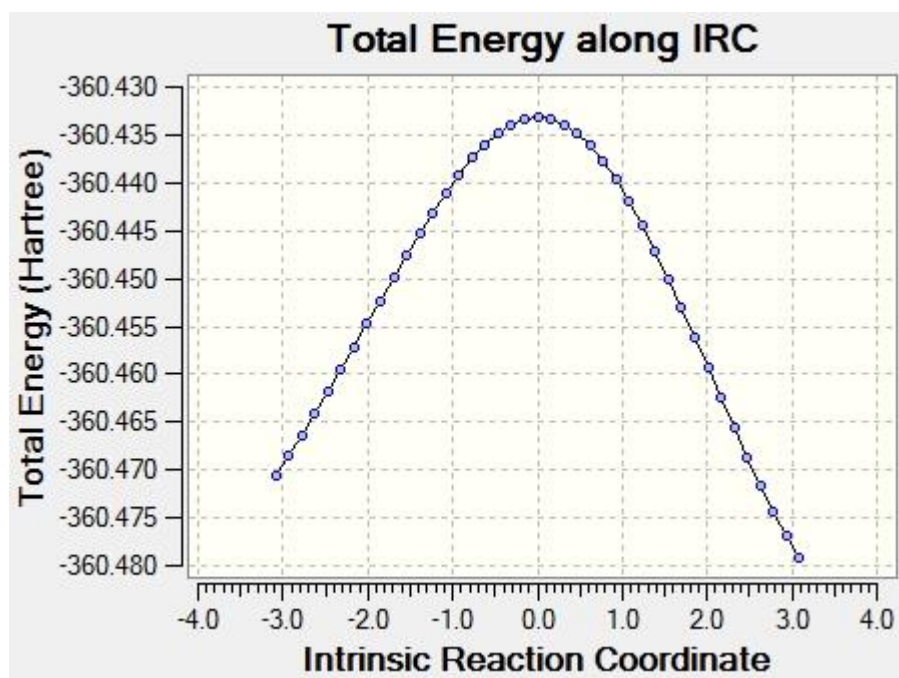

### 7.2.3 2-Substituted butadienes

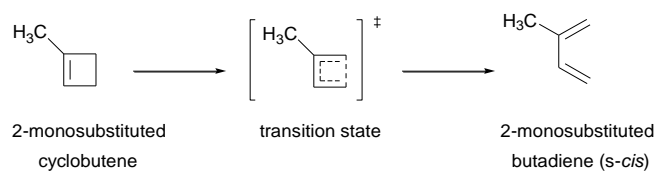

### IRC

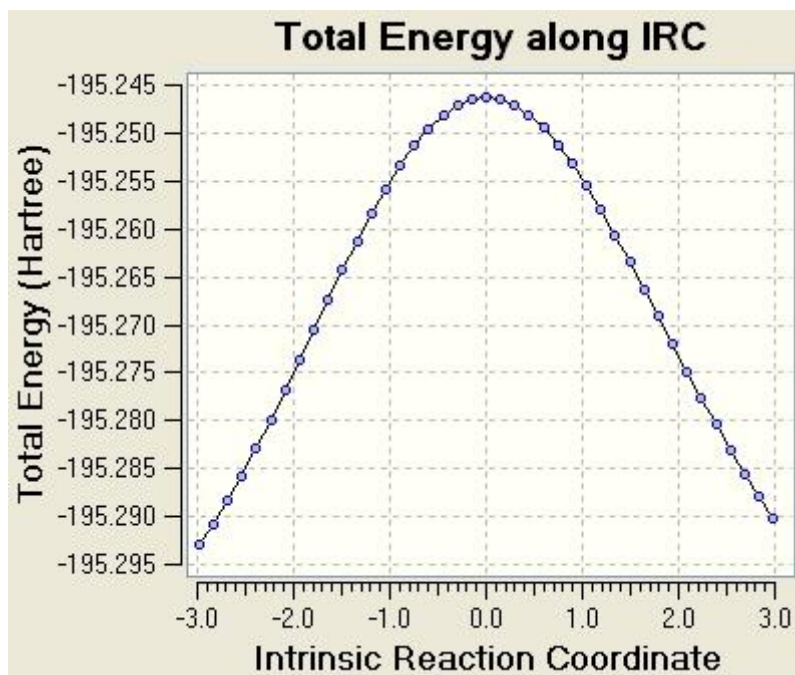

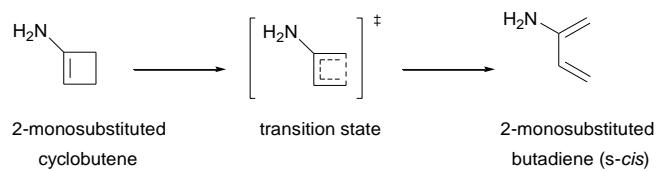

## IRC

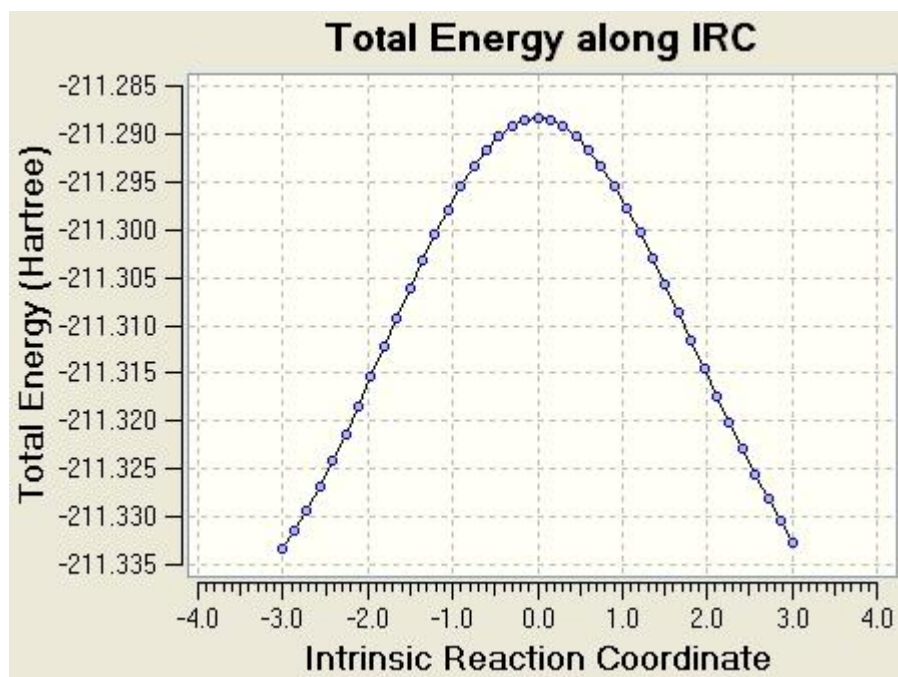



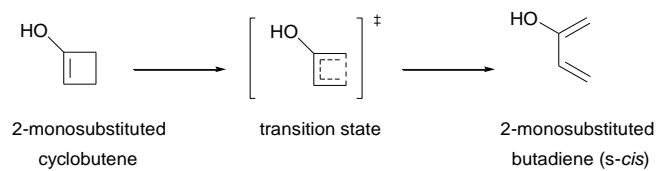

## IRC

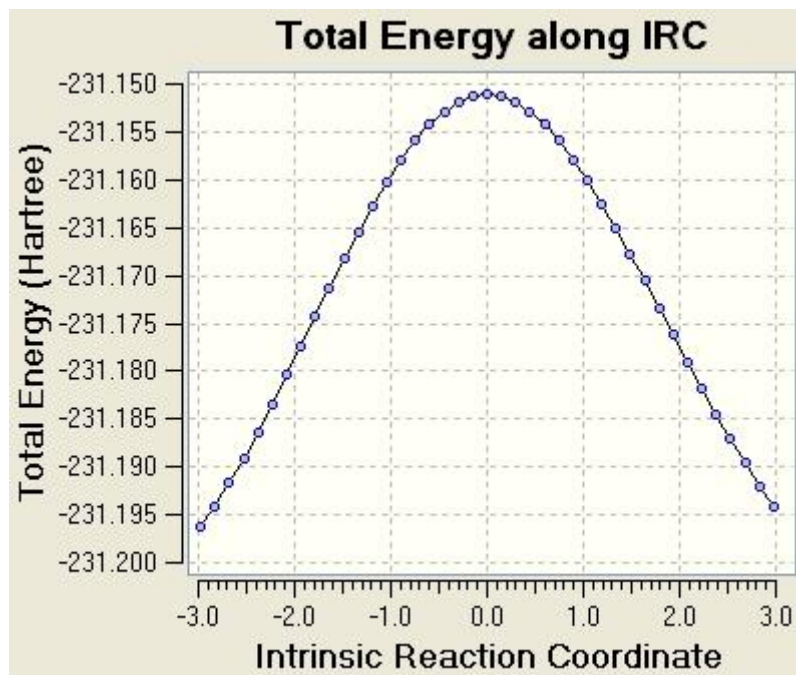

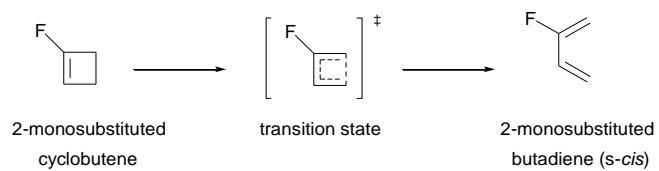**IRC**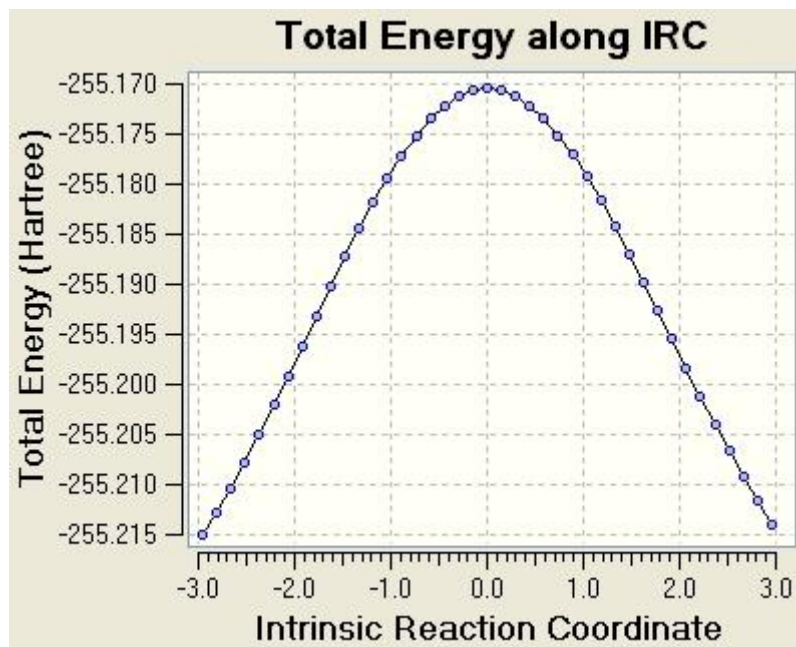

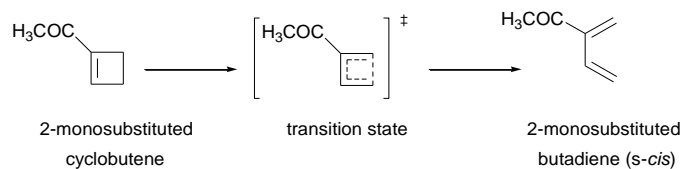

## IRC

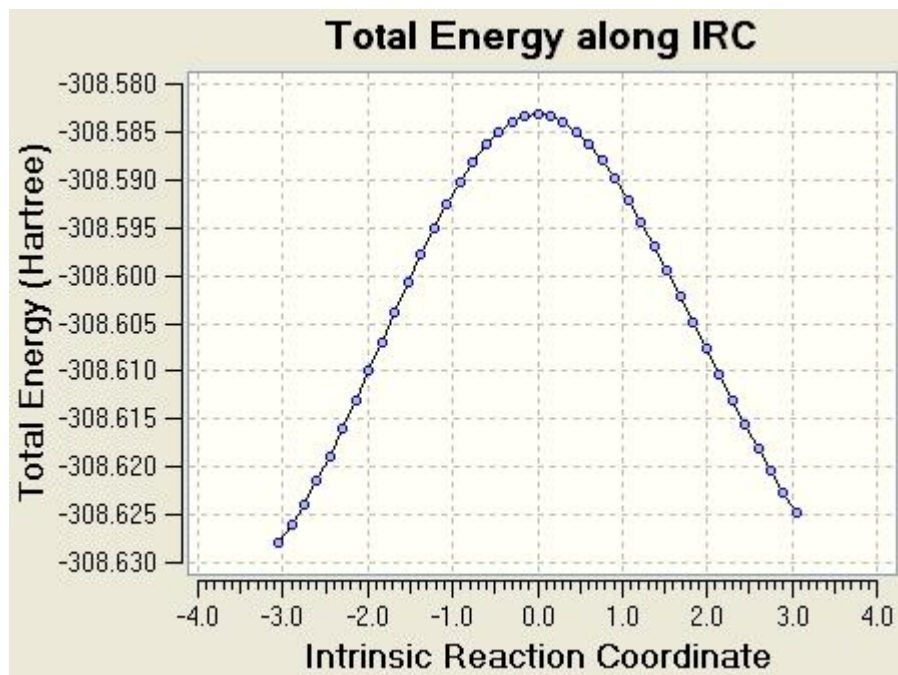

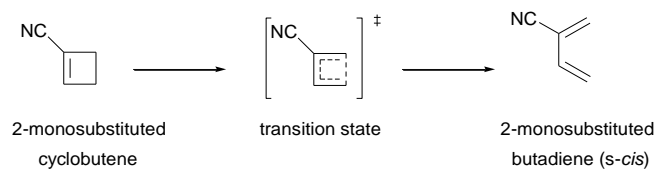

## IRC

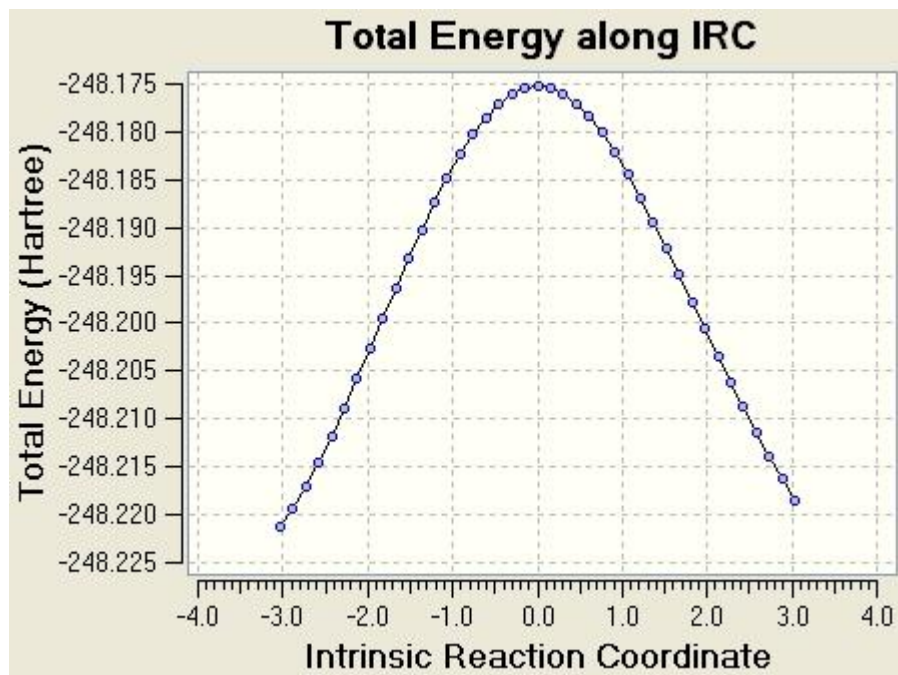

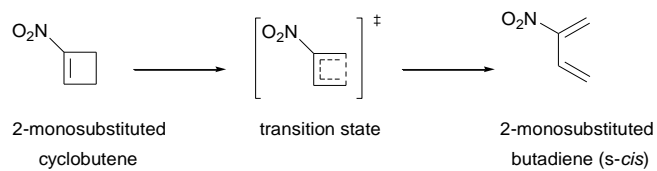

## IRC

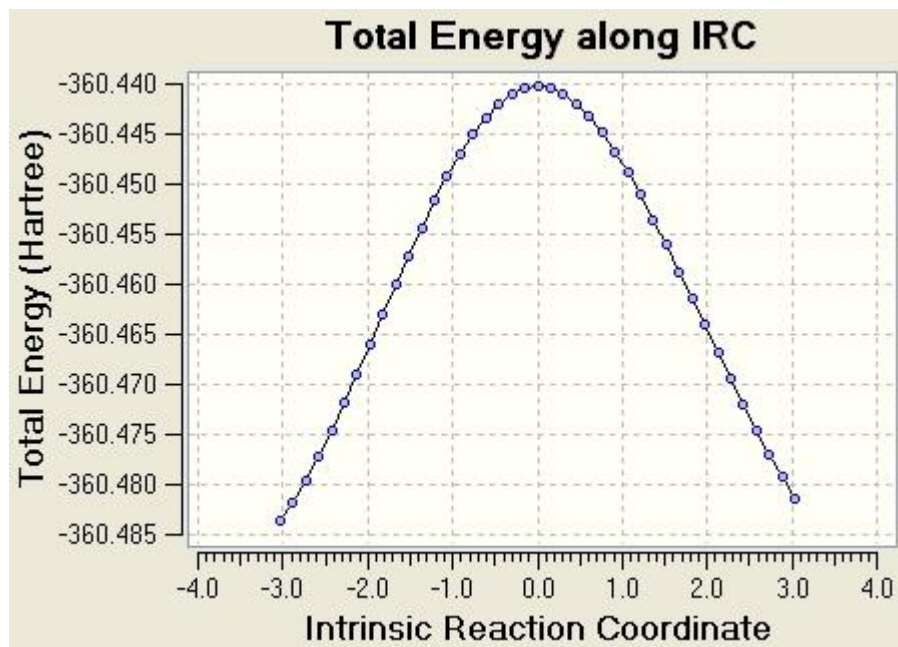

## 7.3 Representative disubstituted butadienes

### 7.3.1 NO<sub>2</sub>-NH<sub>2</sub>-disubstituted butadienes

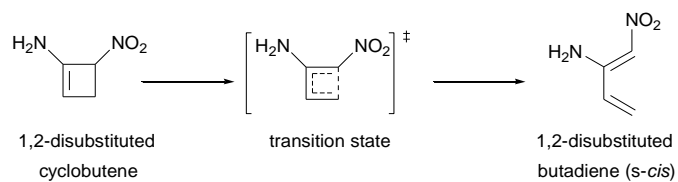

### IRC

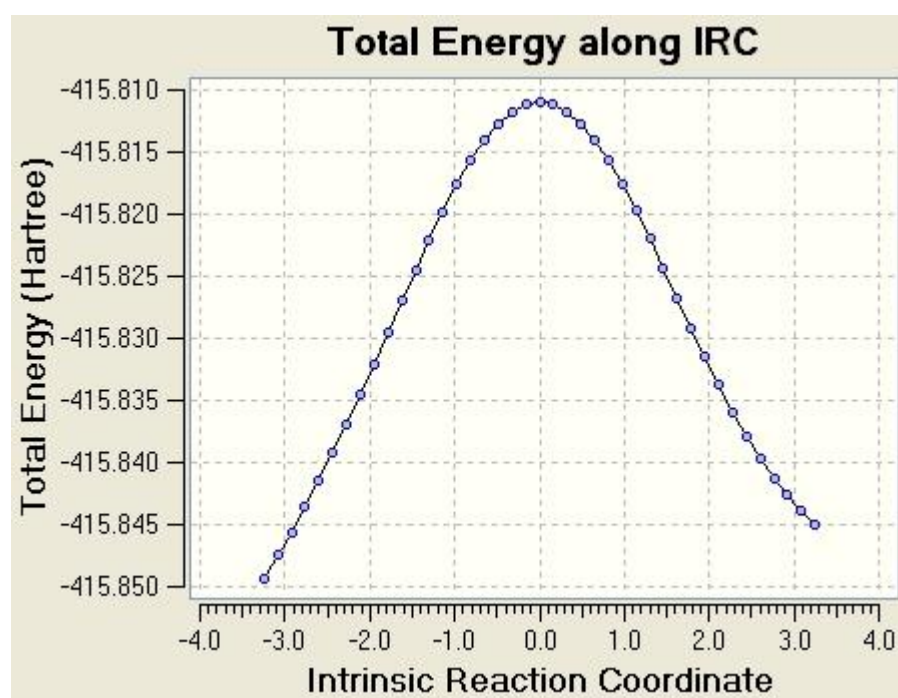

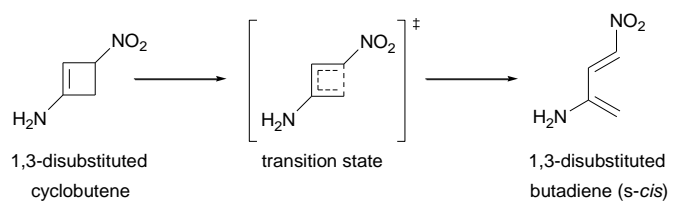

## IRC

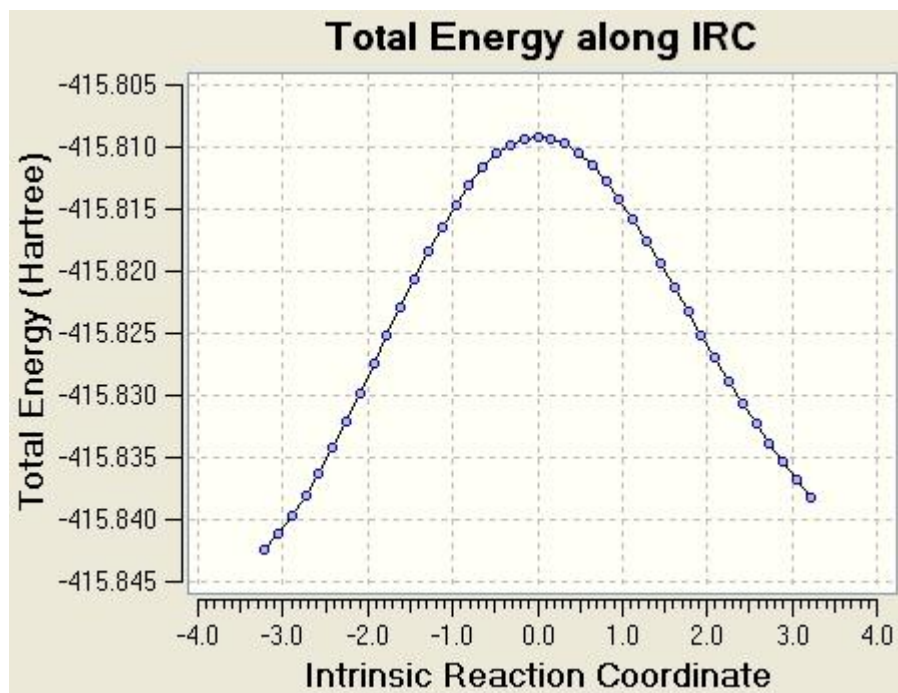

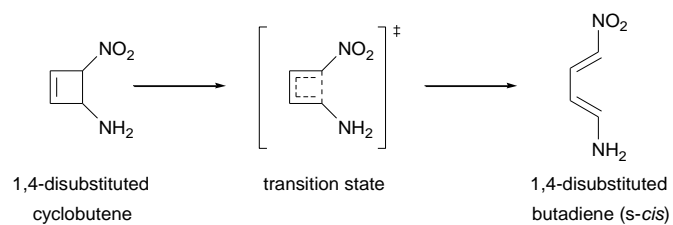

## IRC

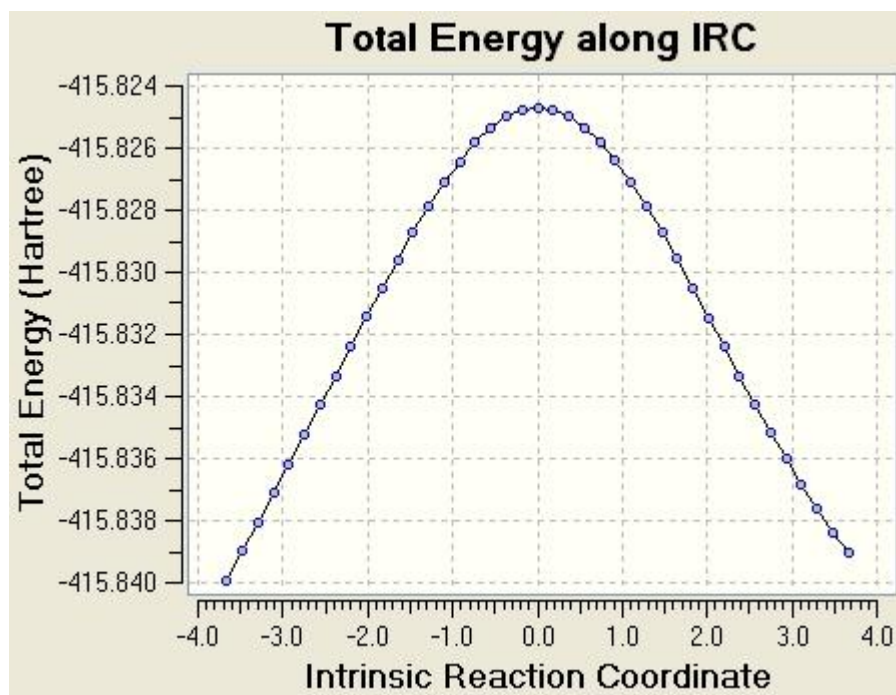



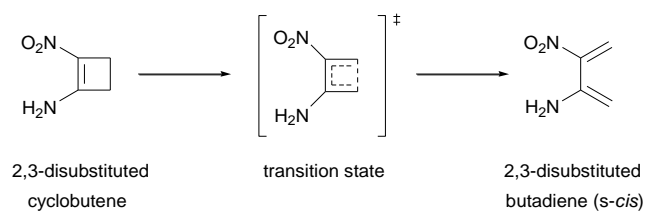

## IRC

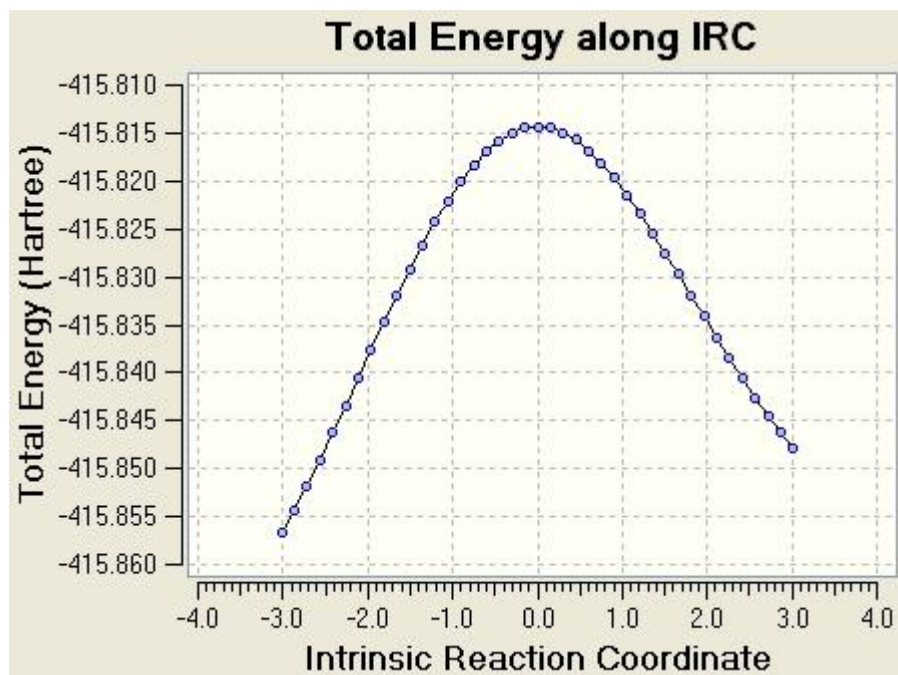

### 7.3.2 NH<sub>2</sub>-NH<sub>2</sub>-Disubstituted butadienes

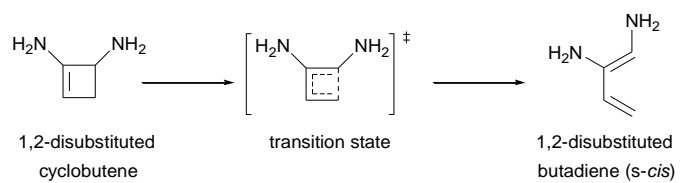

### IRC

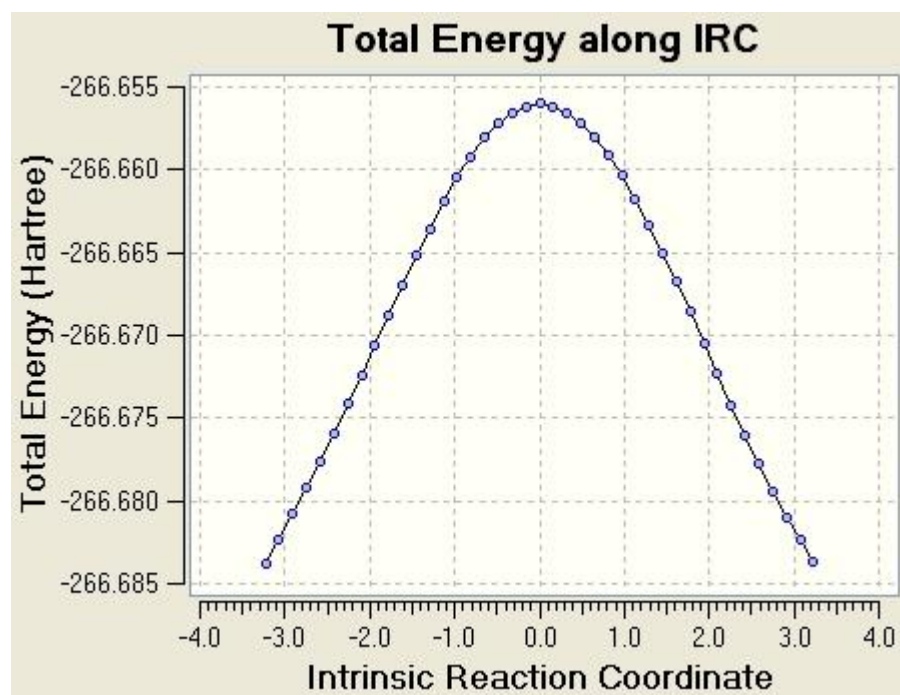

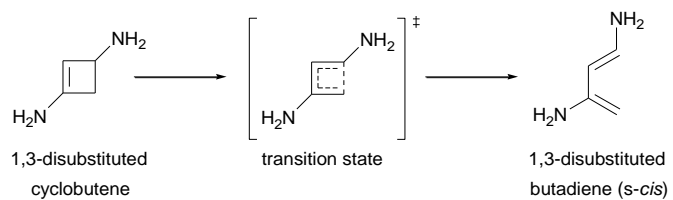

## IRC

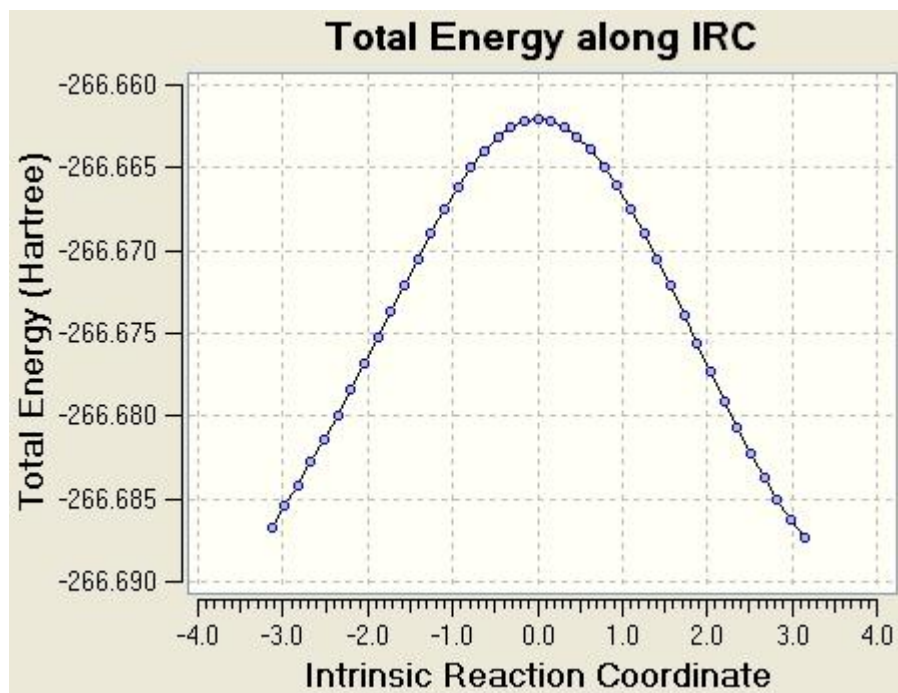

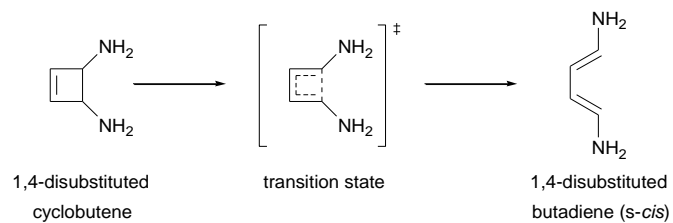

## IRC

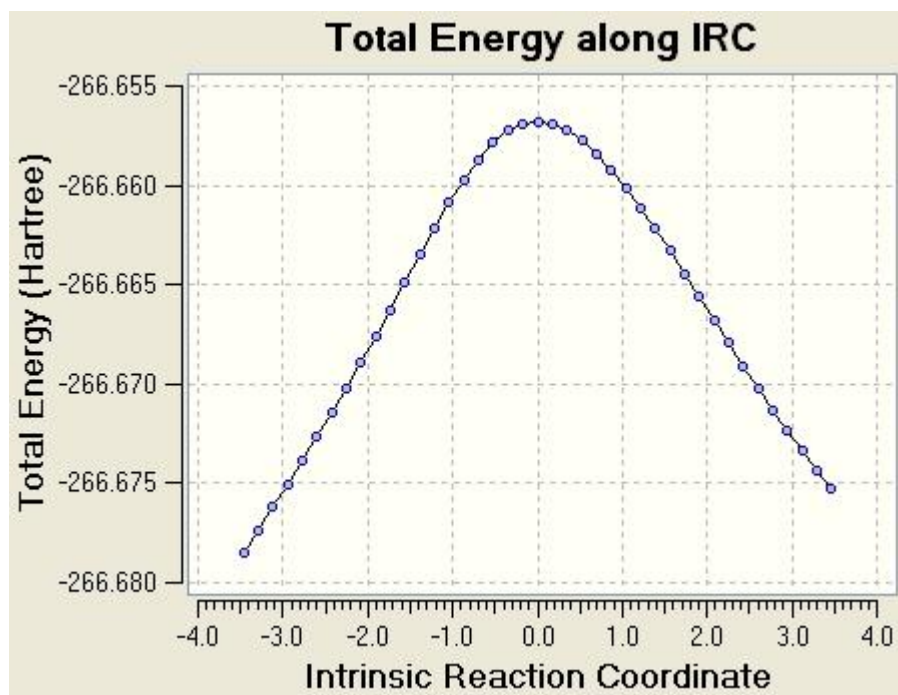



## IRC

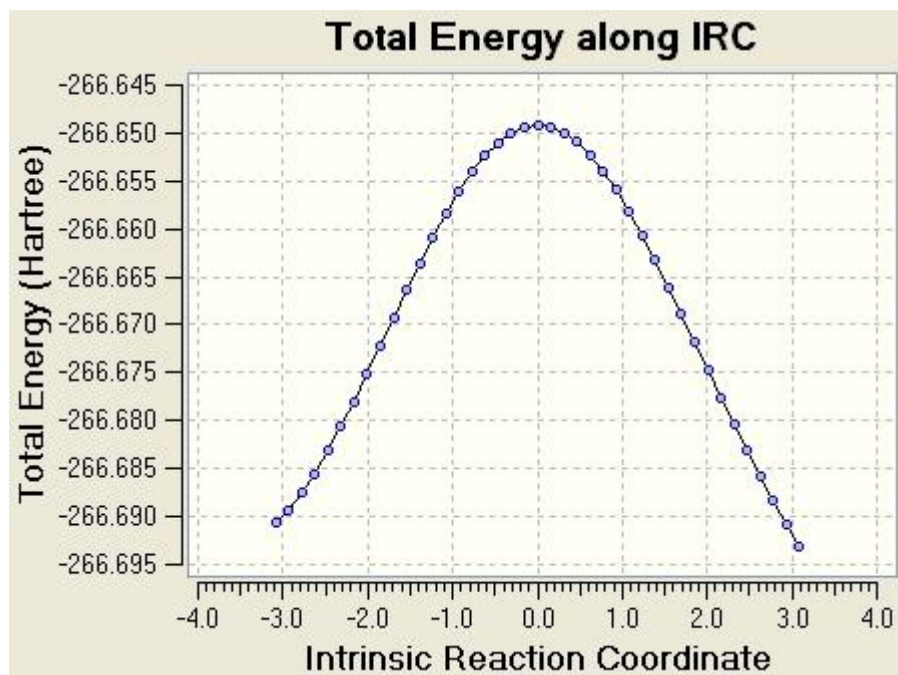

### 7.3.3 NO<sub>2</sub>-NO<sub>2</sub>-Disubstituted Butadienes

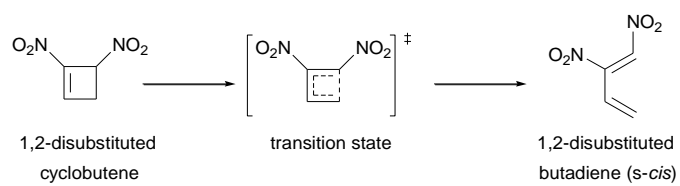

#### IRC

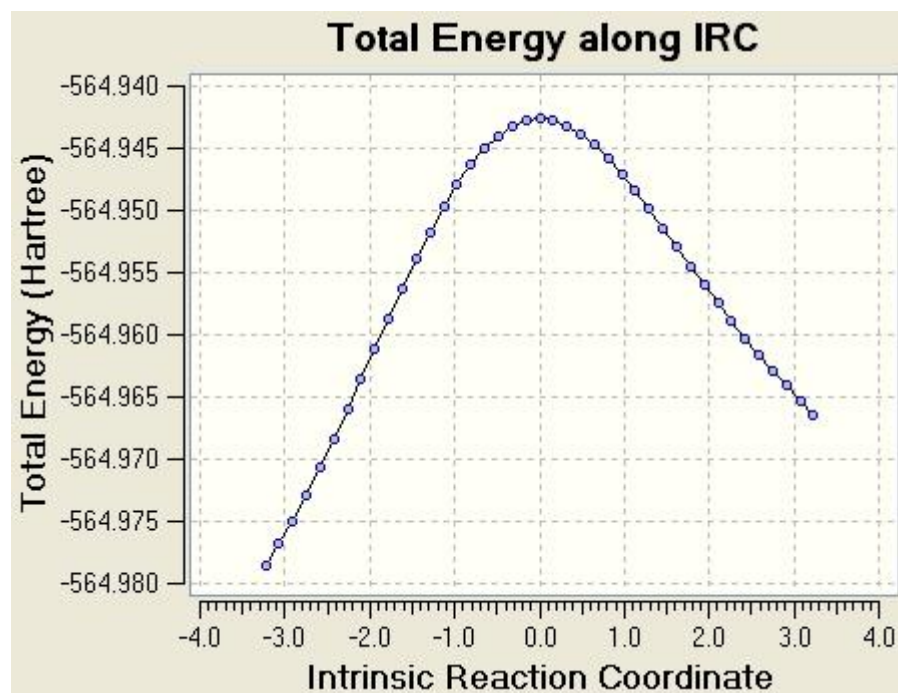

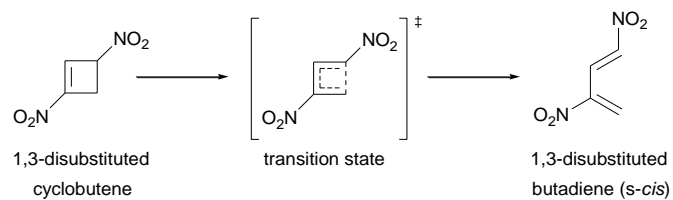**IRC**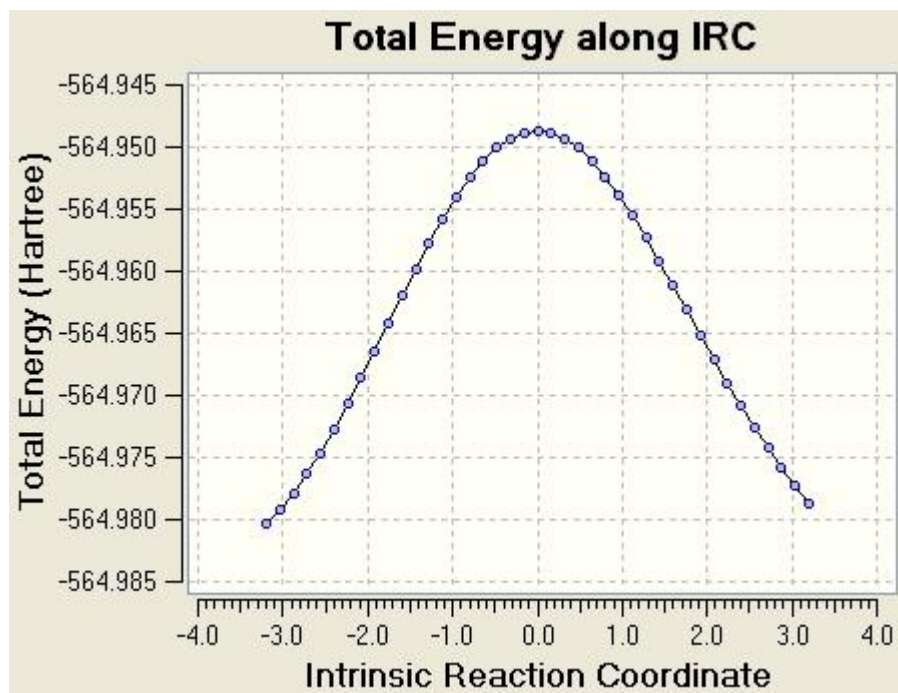

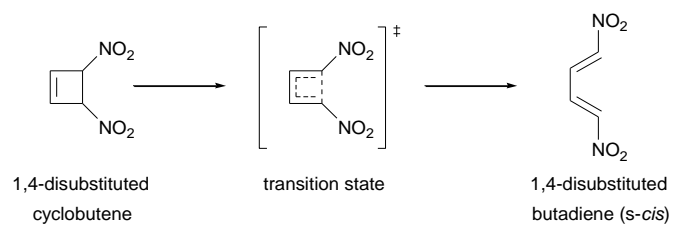

## IRC

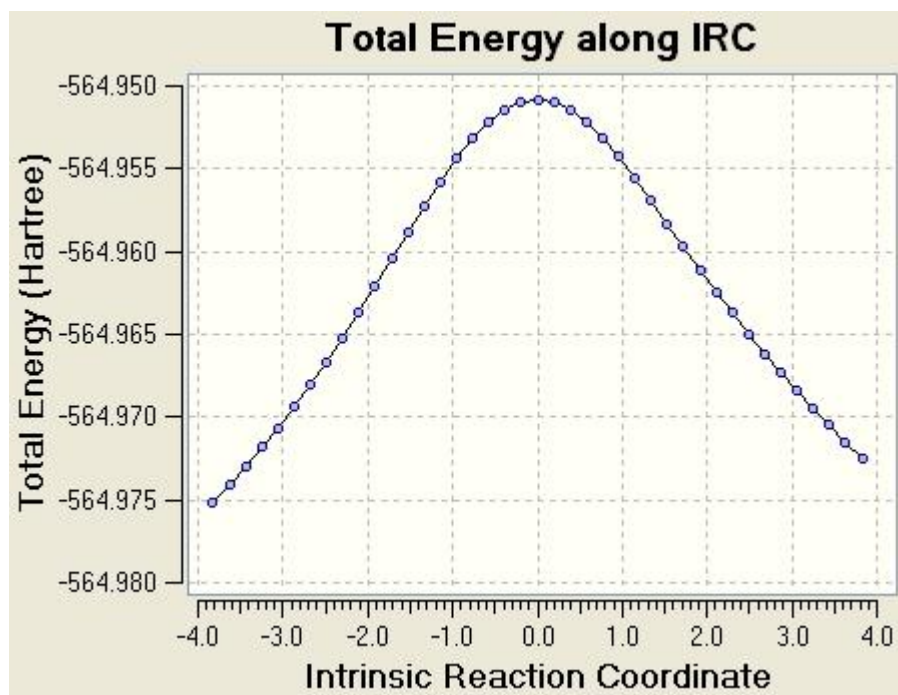



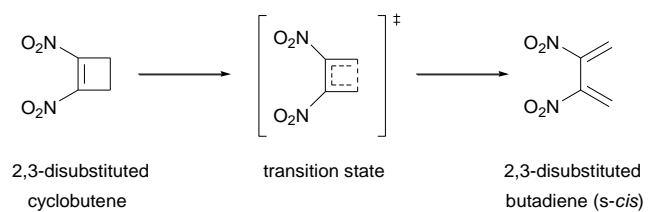

## IRC

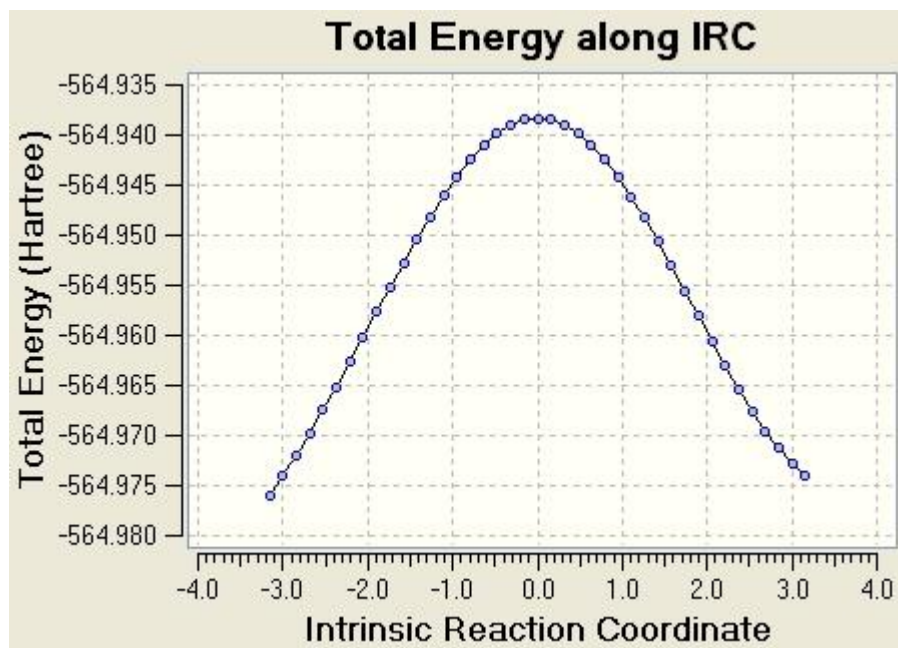

## 8 Reaction exoergonicity values for

### 8.1 Monosubstituted cyclobutenes

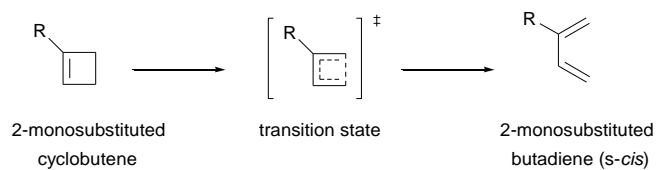

| Entry | R                   | $E_R$ (Kcal mol <sup>-1</sup> ) |
|-------|---------------------|---------------------------------|
| 1     | CH <sub>3</sub>     | -11.4                           |
| 2     | NH <sub>2</sub>     | -8.4                            |
| 3     | OH                  | -8.7                            |
| 4     | F                   | -10.3                           |
| 5     | C(O)CH <sub>3</sub> | -11.1                           |
| 6     | CN                  | -6.5                            |
| 7     | NO <sub>2</sub>     | -7.3                            |

**Note:** Reaction exoergonicity values for unsubstituted cyclobutene and 1-monosubstituted cyclobutenes (for both inward and outward rotations of the substituents) are provided in the Table 1 of the manuscript.

## 8.2 Disubstituted cyclobutenes

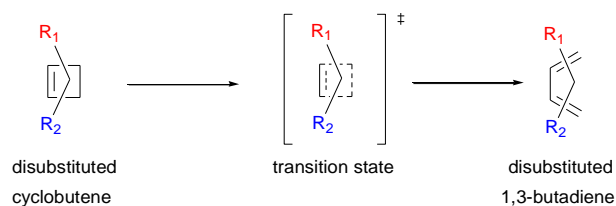

|                                              |                         | $R_2 = \text{CH}_3$ | $R_2 = \text{NH}_2$ | $R_2 = \text{OH}$ | $R_2 = \text{F}$ | $R_2 = \text{C(O)CH}_3$ | $R_2 = \text{CN}$ | $R_2 = \text{NO}_2$ |
|----------------------------------------------|-------------------------|---------------------|---------------------|-------------------|------------------|-------------------------|-------------------|---------------------|
| 1,4-disubstituted cyclobutenes               | $R_1 = \text{CH}_3$     | -8.7                | -8.8                | -11.0             | -12.8            | -3.9                    | -10.2             | -8.9                |
|                                              | $R_1 = \text{NH}_2$     | -14.7               | -13.6               | -12.5             | -17.6            | -13.9                   | -20.7             | -25.0               |
|                                              | $R_1 = \text{OH}$       | -10.6               | -9.2                | -7.9              | -10.5            | -11.2                   | -11.8             | -8.4                |
|                                              | $R_1 = \text{F}$        | -6.3                | -5.2                | -3.8              | -5.7             | -5.8                    | -5.7              | -4.1                |
|                                              | $R_1 = \text{C(O)CH}_3$ | -8.4                | -12.4               | -13.7             | -15.0            | -5.7                    | -9.1              | -6.9                |
|                                              | $R_1 = \text{CN}$       | -12.0               | -16.4               | -13.1             | -14.8            | -8.2                    | -9.5              | -8.7                |
|                                              | $R_1 = \text{NO}_2$     | -6.4                | -16.5               | -6.9              | -7.8             | -4.3                    | -3.5              | -2.5                |
|                                              |                         | $R_2 = \text{CH}_3$ | $R_2 = \text{NH}_2$ | $R_2 = \text{OH}$ | $R_2 = \text{F}$ | $R_2 = \text{C(O)CH}_3$ | $R_2 = \text{CN}$ | $R_2 = \text{NO}_2$ |
| 1,3-disubstituted cyclobutenes               | $R_1 = \text{CH}_3$     | -10.5               | -10.7               | -11.3             | -13.5            | -9.1                    | -10.0             | -11.6               |
|                                              | $R_1 = \text{NH}_2$     | -15.4               | -14.2               | -16.4             | -19.4            | -15.7                   | -17.0             | -19.2               |
|                                              | $R_1 = \text{OH}$       | -10.9               | -9.2                | -11.6             | -14.2            | -10.3                   | -11.6             | -13.8               |
|                                              | $R_1 = \text{F}$        | -5.9                | -3.8                | -5.6              | -8.6             | -6.4                    | -6.9              | -9.4                |
|                                              | $R_1 = \text{C(O)CH}_3$ | -12.5               | -11.6               | -12.1             | -15.4            | -12.4                   | -12.0             | -13.8               |
|                                              | $R_1 = \text{CN}$       | -11.0               | -9.8                | -10.7             | -13.9            | -11.0                   | -11.0             | -13.3               |
|                                              | $R_1 = \text{NO}_2$     | -7.6                | -5.3                | -6.8              | -10.2            | -8.2                    | -7.8              | -10.4               |
|                                              |                         | $R_2 = \text{CH}_3$ | $R_2 = \text{NH}_2$ | $R_2 = \text{OH}$ | $R_2 = \text{F}$ | $R_2 = \text{C(O)CH}_3$ | $R_2 = \text{CN}$ | $R_2 = \text{NO}_2$ |
| <i>trans</i> -3,4-disubstituted cyclobutenes | $R_1 = \text{CH}_3$     | -15.6               | -20.2               | -15.8             | -11.4            | -18.7                   | -17.2             | -14.9               |
|                                              | $R_1 = \text{NH}_2$     |                     | -22.4               | -18.4             | -15.8            | -26.8                   | -24.6             | -24.0               |
|                                              | $R_1 = \text{OH}$       |                     |                     | -16.1             | -11.2            | -20.7                   | -18.4             | -16.2               |
|                                              | $R_1 = \text{F}$        |                     |                     |                   | -7.6             | -15.6                   | -13.8             | -11.1               |
|                                              | $R_1 = \text{C(O)CH}_3$ |                     |                     |                   |                  | -19.4                   | -20.3             | -17.0               |
|                                              | $R_1 = \text{CN}$       |                     |                     |                   |                  |                         | -18.8             | -17.4               |
|                                              | $R_1 = \text{NO}_2$     |                     |                     |                   |                  |                         |                   | -12.5               |
|                                              |                         | $R_2 = \text{CH}_3$ | $R_2 = \text{NH}_2$ | $R_2 = \text{OH}$ | $R_2 = \text{F}$ | $R_2 = \text{C(O)CH}_3$ | $R_2 = \text{CN}$ | $R_2 = \text{NO}_2$ |
| 1,2-disubstituted cyclobutenes               | $R_1 = \text{CH}_3$     | -4.6                | -5.9                | -5.6              | -7.7             | -1.8                    | -2.7              | -1.8                |
|                                              | $R_1 = \text{NH}_2$     |                     | -13.9               | -11.9             | -10.2            | 1.2                     | 1.6               | 6.8                 |
|                                              | $R_1 = \text{OH}$       |                     |                     | -12.3             | -10.1            | -1.1                    | -2.5              | -2.6                |
|                                              | $R_1 = \text{F}$        |                     |                     |                   | -11.4            | -3.7                    | -4.8              | -6.2                |
|                                              | $R_1 = \text{C(O)CH}_3$ |                     |                     |                   |                  | -6.0                    | -1.8              | -5.2                |
|                                              | $R_1 = \text{CN}$       |                     |                     |                   |                  |                         | -3.0              | -4.9                |
|                                              | $R_1 = \text{NO}_2$     |                     |                     |                   |                  |                         |                   | -13.3               |

**Note:** For the highlighted examples described in 1,2-disubstituted cyclobutenes section, computed values indicate endoergic for these systems. It might be due to an effective conjugation of the lone pair of  $\text{NH}_2$  substituents with the  $\pi$  bond of the cyclobutenes, which is clear from the corresponding transition states.

## 8.3 Optimised transition state structures for representative 1,2-disubstituted compounds

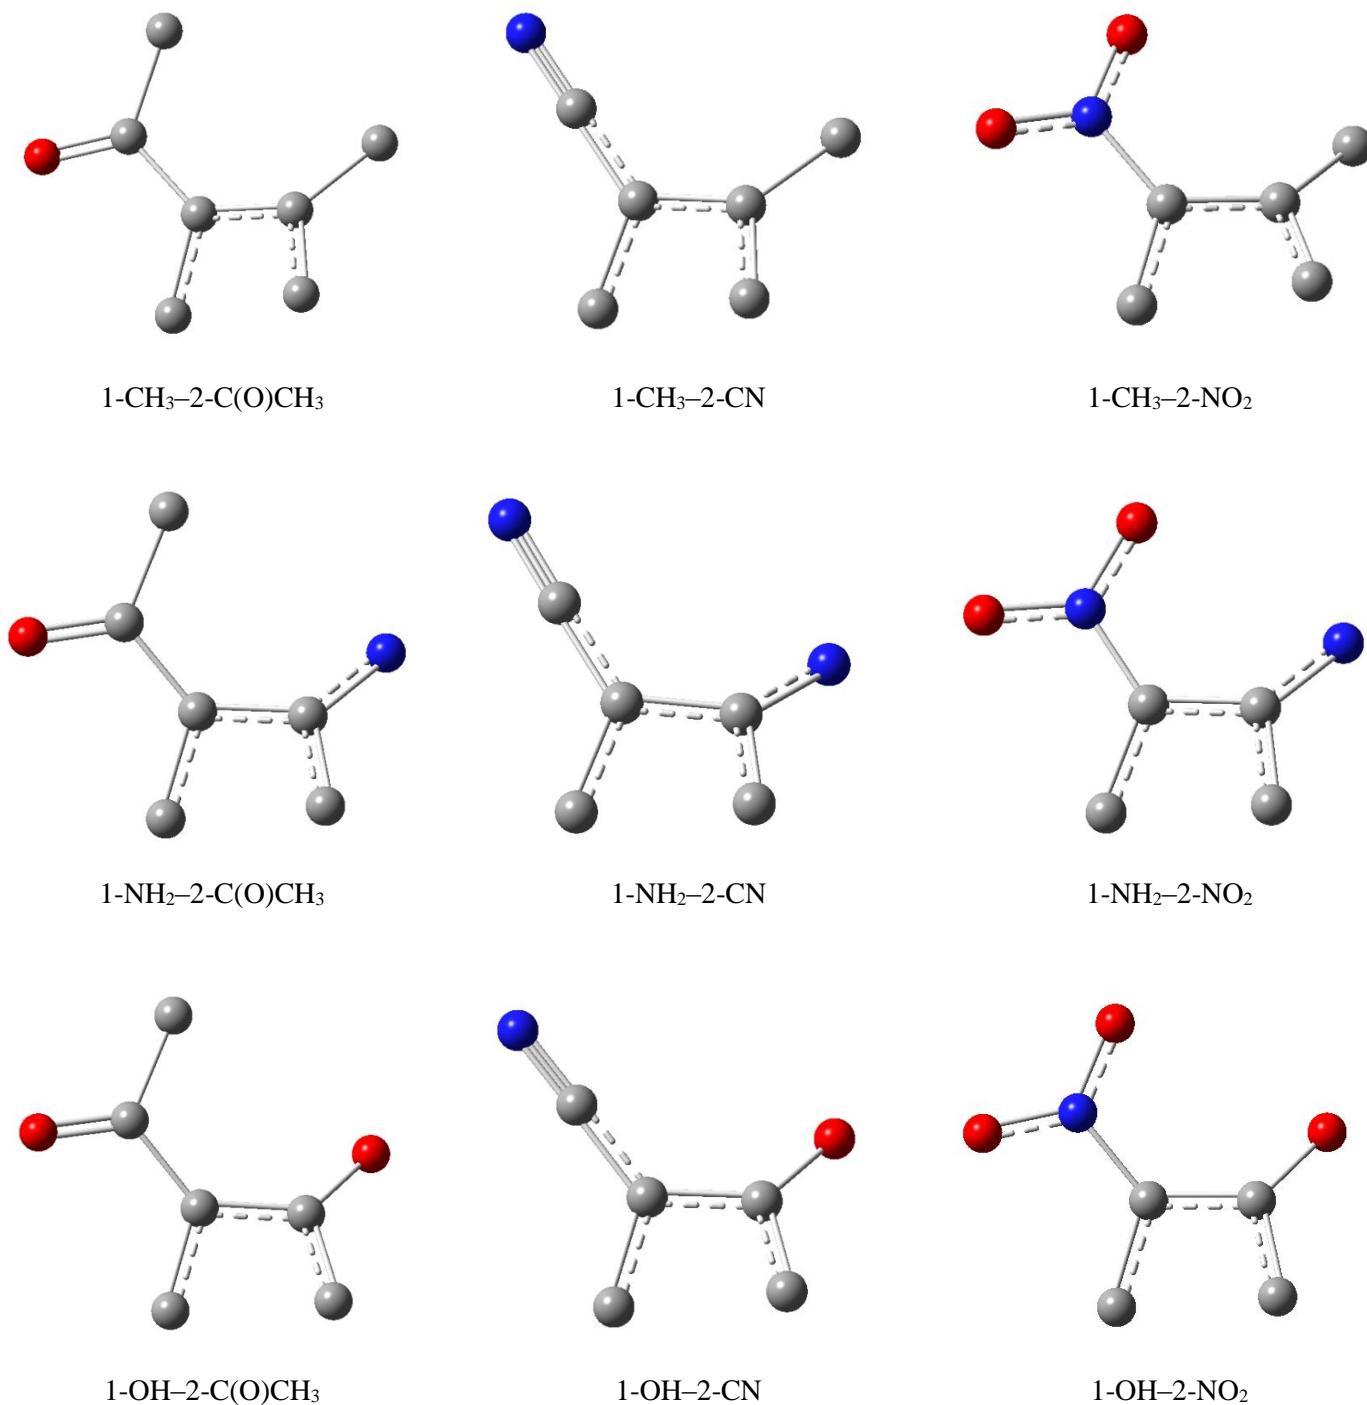

**Note:** For clarity, hydrogen atoms are not shown.

9 *E*<sub>extra</sub> values for disubstituted cyclobutenes

|                                                     |                         | $R_2 = \text{CH}_3$ | $R_2 = \text{NH}_2$ | $R_2 = \text{OH}$ | $R_2 = \text{F}$ | $R_2 = \text{C(O)CH}_3$ | $R_2 = \text{CN}$ | $R_2 = \text{NO}_2$ |
|-----------------------------------------------------|-------------------------|---------------------|---------------------|-------------------|------------------|-------------------------|-------------------|---------------------|
| 1,4-<br>disubstituted<br>cyclobutenes               | $R_1 = \text{CH}_3$     | 0.9                 | 1.3                 | 0.7               | 0.4              | 0.1                     | -0.3              | 0.3                 |
|                                                     | $R_1 = \text{NH}_2$     | 1.2                 | 2.1                 | 5.4               | 1.5              | -0.7                    | -1.7              | -0.9                |
|                                                     | $R_1 = \text{OH}$       | 0.8                 | 3.7                 | 2.7               | 1.5              | -0.9                    | -0.8              | 2.1                 |
|                                                     | $R_1 = \text{F}$        | 0.2                 | 1.4                 | 2.2               | 1.4              | 0.5                     | 0.1               | 1.2                 |
|                                                     | $R_1 = \text{C(O)CH}_3$ | -0.6                | -2.6                | 0.8               | 1.0              | 2.4                     | 0.7               | 1.9                 |
|                                                     | $R_1 = \text{CN}$       | -0.1                | -1.5                | 0.0               | -0.4             | 1.2                     | 0.3               | 1.2                 |
|                                                     | $R_1 = \text{NO}_2$     | 0.4                 | -1.4                | 1.2               | 1.1              | 1.2                     | 1.7               | 3.9                 |
|                                                     |                         | $R_2 = \text{CH}_3$ | $R_2 = \text{NH}_2$ | $R_2 = \text{OH}$ | $R_2 = \text{F}$ | $R_2 = \text{C(O)CH}_3$ | $R_2 = \text{CN}$ | $R_2 = \text{NO}_2$ |
| 1,3-<br>disubstituted<br>cyclobutenes               | $R_1 = \text{CH}_3$     | 0.1                 | 0.2                 | -0.2              | -0.7             | -0.1                    | -0.2              | -0.6                |
|                                                     | $R_1 = \text{NH}_2$     | 0.2                 | -0.1                | -1.1              | -1.9             | -0.2                    | -1.5              | -1.9                |
|                                                     | $R_1 = \text{OH}$       | 0.2                 | 0.3                 | -0.7              | -1.3             | -0.2                    | -1.0              | -1.5                |
|                                                     | $R_1 = \text{F}$        | 0.4                 | 1.4                 | 0.5               | -0.3             | -0.1                    | -0.4              | -0.8                |
|                                                     | $R_1 = \text{C(O)CH}_3$ | -0.7                | 0.4                 | 0.4               | -0.1             | -1.6                    | -0.7              | -0.6                |
|                                                     | $R_1 = \text{CN}$       | 0.3                 | 0.8                 | 0.7               | 0.4              | -0.2                    | 0.0               | -0.1                |
|                                                     | $R_1 = \text{NO}_2$     | 0.6                 | 1.7                 | 1.6               | 1.1              | -0.1                    | 0.6               | 0.5                 |
|                                                     |                         | $R_2 = \text{CH}_3$ | $R_2 = \text{NH}_2$ | $R_2 = \text{OH}$ | $R_2 = \text{F}$ | $R_2 = \text{C(O)CH}_3$ | $R_2 = \text{CN}$ | $R_2 = \text{NO}_2$ |
| <i>trans</i> -3,4-<br>disubstituted<br>cyclobutenes | $R_1 = \text{CH}_3$     | 0.6                 | 1.8                 | 1.4               | 0.9              | -0.7                    | -0.4              | -1.1                |
|                                                     | $R_1 = \text{NH}_2$     |                     | 8.2                 | 6.7               | 2.5              | -4.8                    | -3.0              | -4.9                |
|                                                     | $R_1 = \text{OH}$       |                     |                     | 3.5               | 2.2              | -2.4                    | -1.4              | -2.2                |
|                                                     | $R_1 = \text{F}$        |                     |                     |                   | 1.3              | -0.9                    | -0.6              | -0.6                |
|                                                     | $R_1 = \text{C(O)CH}_3$ |                     |                     |                   |                  | -0.6                    | -0.2              | -1.4                |
|                                                     | $R_1 = \text{CN}$       |                     |                     |                   |                  |                         | -0.5              | -1.5                |
|                                                     | $R_1 = \text{NO}_2$     |                     |                     |                   |                  |                         |                   | 1.2                 |
|                                                     |                         | $R_2 = \text{CH}_3$ | $R_2 = \text{NH}_2$ | $R_2 = \text{OH}$ | $R_2 = \text{F}$ | $R_2 = \text{C(O)CH}_3$ | $R_2 = \text{CN}$ | $R_2 = \text{NO}_2$ |
| 1,2-<br>disubstituted<br>cyclobutenes               | $R_1 = \text{CH}_3$     | -0.4                | -0.9                | -0.1              | -0.5             | -0.3                    | 0.2               | 0.6                 |
|                                                     | $R_1 = \text{NH}_2$     |                     | -6.1                | -3.1              | -2.0             | 1.5                     | 1.9               | 4.2                 |
|                                                     | $R_1 = \text{OH}$       |                     |                     | -2.1              | -0.8             | 0.8                     | 1.1               | 1.5                 |
|                                                     | $R_1 = \text{F}$        |                     |                     |                   | -1.1             | -0.1                    | 0.4               | -0.1                |
|                                                     | $R_1 = \text{C(O)CH}_3$ |                     |                     |                   |                  | -4.2                    | -0.3              | -0.8                |
|                                                     | $R_1 = \text{CN}$       |                     |                     |                   |                  |                         | 0.1               | 0.0                 |
|                                                     | $R_1 = \text{NO}_2$     |                     |                     |                   |                  |                         |                   | -8.6                |
